# Supplementary material for: m6A modification of U6 snRNA modulates usage of two major classes of pre-mRNA 5’ splice site
Source: eLife. 2022 Nov 21;11:e78808. doi: 10.7554/eLife.78808 (PMC9803359; doi:10.7554/eLife.78808)
Supplement: Figure 1—source data 1. [file elife-78808-fig1-data1.xlsx]

## Sheet: ems_snps.high_scoring
Figure 2 source data 1: Mutations identified in early flowering and MAF2 splicing screen
chrom	pos	qual	snp_class	snp_effect	gene	apheno_alt_frac	pheno_alt_frac	g_stat	p_val	fdr	apheno_ref_count	apheno_alt_count	pheno_ref_count	pheno_alt_count
2	6415636	999	MODIFIER	upstream_gene_variant	AT2G14920	0.294118	0.962963	28.9486	7.43227e-08	3.17626e-06	24	10	1	26
2	6772168	999	MODIFIER	upstream_gene_variant	AT2G15530	0.5	0.962264	25.5141	4.39161e-07	1.48494e-05	19	19	2	51
2	7205046	999	MODIFIER	upstream_gene_variant	AT2G16630	0.421053	0.96	19.3241	1.10304e-05	0.00024774	22	16	1	24
2	7279451	999	MODIFIER	5_prime_UTR_variant	AT2G16770	0.305556	1	35.5147	2.53137e-09	1.8114e-07	25	11	0	28
2	7403978	999	LOW	synonymous_variant	AT2G17036	0.462963	0.969697	25.1913	5.1916e-07	1.71769e-05	29	25	1	32
2	7505898	999	MODERATE	missense_variant	AT2G17260	0.311111	0.951613	50.2986	1.32044e-12	4.06299e-10	31	14	3	59
2	7612777	999	MODIFIER	upstream_gene_variant	AT2G17520	0.378378	1	39.6572	3.02691e-10	3.1046e-08	23	14	0	41
2	7625173	999	LOW	synonymous_variant	AT2G17525	0.333333	0.976744	44.4061	2.66855e-11	4.89936e-09	32	16	1	42
2	7691423	999	MODIFIER	upstream_gene_variant	AT2G17700	0.346154	0.975	30.4169	3.48481e-08	1.78713e-06	17	9	1	39
2	7950968	999	MODIFIER	upstream_gene_variant	AT2G18270	0.409091	1	24.3695	7.95158e-07	2.4467e-05	13	9	0	32
2	7965418	999	MODIFIER	upstream_gene_variant	AT2G18330	0.304348	0.969697	27.5053	1.56665e-07	5.95135e-06	16	7	1	32
2	7994464	999	MODIFIER	3_prime_UTR_variant	AT2G18420	0.388889	1	55.3736	9.96683e-14	6.13359e-11	33	21	0	55
2	7996163	999	MODIFIER	downstream_gene_variant	AT2G18410	0.37037	1	50.9914	9.27692e-13	3.56814e-10	34	20	0	46
2	8082238	999	MODERATE	missense_variant	AT2G18630	0.317073	1	45.4389	1.57475e-11	3.23033e-09	28	13	0	38
2	8102600	999	MODIFIER	downstream_gene_variant	AT2G18690	0.297297	0.972222	37.8648	7.58225e-10	6.48072e-08	26	11	1	35
2	8135397	999	MODIFIER	upstream_gene_variant	AT2G18790	0.324324	0.97619	39.8287	2.77244e-10	3.04672e-08	25	12	1	41
2	8212040	999	MODIFIER	downstream_gene_variant	AT2G18950	0.25	0.977273	43.0048	5.46052e-11	8.40101e-09	21	7	1	43
2	8317457	999	MODERATE	missense_variant	AT2G19170	0.4375	1	44.3782	2.70683e-11	4.89936e-09	27	21	0	51
2	8389682	999	MODIFIER	3_prime_UTR_variant	AT2G19390	0.413043	1	42.4698	7.17821e-11	1.05178e-08	27	19	0	45
2	8397897	999	LOW	5_prime_UTR_premature_start_codon_gain_variant	AT2G19390	0.375	0.961538	37.9016	7.4403e-10	6.48072e-08	25	15	2	50
2	8407513	999	MODIFIER	upstream_gene_variant	AT2G19400	0.269231	0.97561	37.5769	8.78779e-10	7.30811e-08	19	7	1	40
2	8417118	999	LOW	synonymous_variant	AT2G19430	0.22	1	59.2787	1.36848e-14	2.93974e-11	39	11	0	36
2	8511666	999	MODIFIER	upstream_gene_variant	AT2G19720	0.238095	0.969697	43.4494	4.35058e-11	7.04566e-09	32	10	1	32
2	8765555	999	MODIFIER	upstream_gene_variant	AT2G20310	0.340909	1	50.5215	1.17865e-12	4.02968e-10	29	15	0	46
2	8794275	999	MODIFIER	3_prime_UTR_variant	AT2G20370	0.478261	1	29.4572	5.71648e-08	2.62531e-06	24	22	0	35
2	8805573	999	MODIFIER	5_prime_UTR_variant	AT2G20420	0.325	0.980392	47.6544	5.08377e-12	1.30356e-09	27	13	1	50
2	8892509	999	MODERATE	missense_variant	AT2G20620	0.37931	1	34.8792	3.50808e-09	2.29667e-07	18	11	0	40
2	8961721	999	MODERATE	missense_variant	AT2G20815	0.326087	1	54.066	1.93863e-13	9.94195e-11	31	15	0	47
2	9041454	999	HIGH	splice_donor_variant&intron_variant	AT2G21070	0.264151	1	56.7652	4.9108e-14	3.77763e-11	39	14	0	38
2	9061575	999	MODERATE	missense_variant	AT2G21140	0.311111	1	57.8242	2.86618e-14	2.93974e-11	31	14	0	50
2	9069021	999	MODERATE	missense_variant	AT2G21160	0.396226	0.977778	40.4853	1.98101e-10	2.39352e-08	32	21	1	44
2	9075180	999	MODERATE	missense_variant	AT2G21180	0.391304	0.977273	38.0543	6.88042e-10	6.22678e-08	28	18	1	43
2	9105442	999	MODIFIER	upstream_gene_variant	AT2G21237	0.387755	1	45.6119	1.44166e-11	3.16857e-09	30	19	0	44
2	9268204	999	MODERATE	missense_variant	AT2G21680	0.475	1	27.6419	1.45985e-07	5.61496e-06	21	19	0	34
2	9355256	999	MODIFIER	upstream_gene_variant	AT2G21950	0.323529	0.980392	44.1326	3.0686e-11	5.2456e-09	23	11	1	50
2	9553577	999	MODIFIER	upstream_gene_variant	AT2G07585	0.382353	0.95122	27.9479	1.24627e-07	4.91636e-06	21	13	2	39
2	9564181	999	MODERATE	missense_variant	AT2G22500	0.4375	1	31.5208	1.9732e-08	1.10392e-06	18	14	0	40
2	9836053	999	MODIFIER	upstream_gene_variant	AT2G23110	0.418182	1	47.728	4.89642e-12	1.30356e-09	32	23	0	49
2	9886338	999	LOW	synonymous_variant	AT2G23220	0.387097	0.956522	39.7495	2.88718e-10	3.0634e-08	38	24	2	44
2	9895787	999	MODIFIER	3_prime_UTR_variant	AT2G23240	0.4375	0.964286	19.1416	1.2137e-05	0.000265487	18	14	1	27
2	9918593	999	LOW	synonymous_variant	AT2G23310	0.428571	0.954545	28.583	8.97679e-08	3.73265e-06	24	18	2	42
2	9996595	999	LOW	synonymous_variant	AT2G23460	0.45098	0.95082	34.9468	3.38836e-09	2.26652e-07	28	23	3	58
2	10282116	999	MODERATE	missense_variant	AT2G24180	0.439024	0.975	29.2059	6.50822e-08	2.90229e-06	23	18	1	39
2	10295080	999	MODERATE	missense_variant	AT2G24210	0.454545	0.952381	25.6581	4.07586e-07	1.39349e-05	24	20	2	40
2	10404697	999	MODERATE	missense_variant&splice_region_variant	AT2G24510	0.467742	0.958333	18.3988	1.79167e-05	0.000375032	33	29	1	23
2	10960133	999	MODIFIER	upstream_gene_variant	AT2G25720	0.4	0.972973	30.2977	3.70557e-08	1.80985e-06	24	16	1	36
