# Supplementary material for: m6A modification of U6 snRNA modulates usage of two major classes of pre-mRNA 5’ splice site
Source: eLife. 2022 Nov 21;11:e78808. doi: 10.7554/eLife.78808 (PMC9803359; doi:10.7554/eLife.78808)
Supplement: Figure 2—source data 1. [file elife-78808-fig2-data1.xlsx]

## Sheet: fio1_lcms
Figure 2 source data 1: LC:MS/MS data for Col-0, fio1-1 and ¬fip37-4 poly(A)+ RNA.
geno	exp	A	m6A	ratio
fio1-1	anya	23358489	225491	0.00965349
fio1-1	anya	30432338	235442	0.00773657
fio1-1	anya	30816801	227513	0.00738276
fio1-1	anya	31527441	240769	0.00763681
fip37-4	anya	26404670	40761	0.0015437
fip37-4	anya	26186657	51890	0.00198154
fip37-4	anya	24970856	39193	0.00156955
fip37-4	anya	27467980	33660	0.00122543
col0	anya	26279463	248345	0.00945016
col0	anya	25399390	233770	0.00920376
col0	anya	25566309	208372	0.00815026
col0	anya	29981220	238343	0.00794974
col0	nisha	2774512	17413	0.00627606
col0	nisha	2331550	15854	0.00679977
