# Supplementary material for: m6A modification of U6 snRNA modulates usage of two major classes of pre-mRNA 5’ splice site
Source: eLife. 2022 Nov 21;11:e78808. doi: 10.7554/eLife.78808 (PMC9803359; doi:10.7554/eLife.78808)
Supplement: Figure 2—source data 3. [file elife-78808-fig2-data3.xlsx]

## Sheet: Sysy_202003
Figure 2 - source data 3: m6A-IP qPCR data for U6 and U2 snRNAs in Col-0, fio1-1, fio1-3 and fio1-4 mutants.
gene_id	genotype	treatment	bio_rep	tech_rep	ct
U6	col0	IP	1	1	11.7
U6	col0	IP	1	2	13.25
U6	col0	IP	1	3	10.9
U6	col0	IP	2	1	9.81
U6	col0	IP	2	2	9.83
U6	col0	IP	2	3	9.73
U6	col0	IP	3	1	9.26
U6	col0	IP	3	2	8.93
U6	col0	IP	3	3	9.32
U6	fio1	IP	1	1	15.11
U6	fio1	IP	1	2	15.3
U6	fio1	IP	1	3	15.34
U6	fio1	IP	2	1	16.37
U6	fio1	IP	2	2	16.09
U6	fio1	IP	2	3	16.4
U6	fio1	IP	3	1	16.44
U6	fio1	IP	3	2	16.53
U6	fio1	IP	3	3	16.55
U2	col0	IP	1	1	23.45
U2	col0	IP	1	2	23.48
U2	col0	IP	1	3	23.62
U2	col0	IP	2	1	23.52
U2	col0	IP	2	2	23.59
U2	col0	IP	2	3	23.65
U2	col0	IP	3	1	23.48
U2	col0	IP	3	2	23.54
U2	col0	IP	3	3	23.57
U2	fio1	IP	1	1	24.28
U2	fio1	IP	1	2	24.37
U2	fio1	IP	1	3	24.38
U2	fio1	IP	2	1	25.11
U2	fio1	IP	2	2	25.13
U2	fio1	IP	2	3	25.27
U2	fio1	IP	3	1	24.94
U2	fio1	IP	3	2	25.09
U2	fio1	IP	3	3	25.01
U6	col0	input	1	1	13.07
U6	col0	input	1	2	12.88
U6	col0	input	1	3	12.83
U6	col0	input	2	1	10.47
U6	col0	input	2	2	10.59
U6	col0	input	2	3	10.7
U6	col0	input	3	1	11
U6	col0	input	3	2	10.96
U6	col0	input	3	3	10.82
U6	fio1	input	1	1	11.78
U6	fio1	input	1	2	11.35
U6	fio1	input	1	3	12.02
U6	fio1	input	2	1	11.35
U6	fio1	input	2	2	10.94
U6	fio1	input	2	3	11.41
U6	fio1	input	3	1	13.01
U6	fio1	input	3	2	11.71
U6	fio1	input	3	3	11.93
U2	col0	input	1	1	25.69
U2	col0	input	1	2	25.45
U2	col0	input	1	3	25.21
U2	col0	input	2	1	25.45
U2	col0	input	2	2	25.4
U2	col0	input	2	3	25.47
U2	col0	input	3	1	25.46
U2	col0	input	3	2	25.49
U2	col0	input	3	3	25.33
U2	fio1	input	1	1	26.34
U2	fio1	input	1	2	26.34
U2	fio1	input	1	3	26.41
U2	fio1	input	2	1	25.79
U2	fio1	input	2	2	25.58
U2	fio1	input	2	3	25.77
U2	fio1	input	3	1	26.56
U2	fio1	input	3	2	26.31
U2	fio1	input	3	3	26.36

## Sheet: ABE572
Figure 2 - source data 3: m6A-IP qPCR data for U6 and U2 snRNAs in Col-0, fio1-1, fio1-3 and fio1-4 mutants.
genotype	bio_rep	tech_rep	gene_id	treatment	ct
col0	1	1	U6	IP	18.33
col0	1	2	U6	IP	18.37
col0	1	3	U6	IP	18.96
col0	1	4	U6	IP	18.63
fio1-1	1	1	U6	IP	21.69
fio1-1	1	2	U6	IP	22.33
fio1-1	1	3	U6	IP	21.64
fio1-1	1	4	U6	IP	22.11
fio1-3	1	1	U6	IP	21.71
fio1-3	1	2	U6	IP	21.33
fio1-3	1	3	U6	IP	21.79
fio1-3	1	4	U6	IP	21.26
fio1-4	1	1	U6	IP	23.08
fio1-4	1	2	U6	IP	22.67
fio1-4	1	3	U6	IP	22.41
fio1-4	1	4	U6	IP	22.46
col0	1	1	U6	IgG	27.31
col0	1	2	U6	IgG	27.64
col0	1	3	U6	IgG	26.99
col0	1	4	U6	IgG	26.89
fio1-1	1	1	U6	IgG	25.28
fio1-1	1	2	U6	IgG	25.46
fio1-1	1	3	U6	IgG	25.48
fio1-1	1	4	U6	IgG	25.12
fio1-3	1	1	U6	IgG	25.65
fio1-3	1	2	U6	IgG	25.93
fio1-3	1	3	U6	IgG	24.79
fio1-3	1	4	U6	IgG	25.1
fio1-4	1	1	U6	IgG	24.89
fio1-4	1	2	U6	IgG	25.72
fio1-4	1	3	U6	IgG	24.55
fio1-4	1	4	U6	IgG	25.24
col0	1	1	U6	input	22.26
col0	1	2	U6	input	22.9
col0	1	3	U6	input	21.49
col0	1	4	U6	input	22.11
fio1-1	1	1	U6	input	17.13
fio1-1	1	2	U6	input	17.59
fio1-1	1	3	U6	input	16.44
fio1-1	1	4	U6	input	16.74
fio1-3	1	1	U6	input	19.02
fio1-3	1	2	U6	input	19.51
fio1-3	1	3	U6	input	19.08
fio1-3	1	4	U6	input	19.37
fio1-4	1	1	U6	input	17.98
fio1-4	1	2	U6	input	18.45
fio1-4	1	3	U6	input	17.32
fio1-4	1	4	U6	input	17.71
col0	1	1	U2	IP	31.71
col0	1	2	U2	IP	31.74
col0	1	3	U2	IP	31.64
col0	1	4	U2	IP	32.03
fio1-1	1	1	U2	IP	31.95
fio1-1	1	2	U2	IP	33.02
fio1-1	1	3	U2	IP	32.47
fio1-1	1	4	U2	IP	31.62
fio1-3	1	1	U2	IP	32.94
fio1-3	1	2	U2	IP	32.72
fio1-3	1	3	U2	IP	32.79
fio1-3	1	4	U2	IP	29.03
fio1-4	1	1	U2	IP	32.11
fio1-4	1	2	U2	IP	35.49
fio1-4	1	3	U2	IP	32.43
fio1-4	1	4	U2	IP	33.3
col0	1	1	U2	IgG	37.02
col0	1	2	U2	IgG	39.96
col0	1	3	U2	IgG	37.74
col0	1	4	U2	IgG	35.18
fio1-1	1	1	U2	IgG	36.99
fio1-1	1	2	U2	IgG	38.5
fio1-1	1	3	U2	IgG	35.24
fio1-1	1	4	U2	IgG	34.48
fio1-3	1	1	U2	IgG	32.81
fio1-3	1	2	U2	IgG	38.92
fio1-3	1	3	U2	IgG
fio1-3	1	4	U2	IgG	39.72
fio1-4	1	1	U2	IgG	36.3
fio1-4	1	2	U2	IgG	36.14
fio1-4	1	3	U2	IgG	36.35
fio1-4	1	4	U2	IgG	28.2
col0	1	1	U2	input	33.29
col0	1	2	U2	input	33.03
col0	1	3	U2	input	31.49
col0	1	4	U2	input	32.12
fio1-1	1	1	U2	input	31.17
fio1-1	1	2	U2	input	32.01
fio1-1	1	3	U2	input	30.6
fio1-1	1	4	U2	input	31.26
fio1-3	1	1	U2	input	33.62
fio1-3	1	2	U2	input	32.71
fio1-3	1	3	U2	input	32.27
fio1-3	1	4	U2	input	33.4
fio1-4	1	1	U2	input	31.66
fio1-4	1	2	U2	input	31.98
fio1-4	1	3	U2	input	31.54
fio1-4	1	4	U2	input	31.17
col0	2	1	U6	IP	20.23
col0	2	2	U6	IP	20.17
col0	2	3	U6	IP	20.45
col0	2	4	U6	IP	19.95
fio1-1	2	1	U6	IP	27.56
fio1-1	2	2	U6	IP	27.36
fio1-1	2	3	U6	IP	27.55
fio1-1	2	4	U6	IP	27.09
fio1-3	2	1	U6	IP	26.23
fio1-3	2	2	U6	IP	25.58
fio1-3	2	3	U6	IP	26.05
fio1-3	2	4	U6	IP	25.72
fio1-4	2	1	U6	IP	25.05
fio1-4	2	2	U6	IP	24.94
fio1-4	2	3	U6	IP	26.64
fio1-4	2	4	U6	IP	26.5
col0	2	1	U6	IgG	27.24
col0	2	2	U6	IgG	27.36
col0	2	3	U6	IgG	27.21
col0	2	4	U6	IgG	27.7
fio1-1	2	1	U6	IgG	21.58
fio1-1	2	2	U6	IgG	21.46
fio1-1	2	3	U6	IgG	22
fio1-1	2	4	U6	IgG	21.71
fio1-3	2	1	U6	IgG	33.29
fio1-3	2	2	U6	IgG	33.03
fio1-3	2	3	U6	IgG	31.49
fio1-3	2	4	U6	IgG	32.12
fio1-4	2	1	U6	IgG	28.07
fio1-4	2	2	U6	IgG	28.13
fio1-4	2	3	U6	IgG	27.84
fio1-4	2	4	U6	IgG	27.75
col0	2	1	U6	input	23.21
col0	2	2	U6	input	23.66
col0	2	3	U6	input	22.74
col0	2	4	U6	input	23.26
fio1-1	2	1	U6	input	16.96
fio1-1	2	2	U6	input	17.07
fio1-1	2	3	U6	input	17.35
fio1-1	2	4	U6	input	17.83
fio1-3	2	1	U6	input	19.46
fio1-3	2	2	U6	input	19.88
fio1-3	2	3	U6	input	19.17
fio1-3	2	4	U6	input	19.5
fio1-4	2	1	U6	input	21.49
fio1-4	2	2	U6	input	22.13
fio1-4	2	3	U6	input	22.43
fio1-4	2	4	U6	input	23.13
col0	2	1	U2	IP
col0	2	2	U2	IP
col0	2	3	U2	IP	40.07
col0	2	4	U2	IP
fio1-1	2	1	U2	IP
fio1-1	2	2	U2	IP
fio1-1	2	3	U2	IP	38.64
fio1-1	2	4	U2	IP
fio1-3	2	1	U2	IP
fio1-3	2	2	U2	IP
fio1-3	2	3	U2	IP	32.66
fio1-3	2	4	U2	IP
fio1-4	2	1	U2	IP
fio1-4	2	2	U2	IP
fio1-4	2	3	U2	IP	34.01
fio1-4	2	4	U2	IP
col0	2	1	U2	IgG	39.73
col0	2	2	U2	IgG
col0	2	3	U2	IgG	33.51
col0	2	4	U2	IgG	37.44
fio1-1	2	1	U2	IgG	38.51
fio1-1	2	2	U2	IgG	40.28
fio1-1	2	3	U2	IgG	38.83
fio1-1	2	4	U2	IgG	39.67
fio1-3	2	1	U2	IgG	33.26
fio1-3	2	2	U2	IgG	38.75
fio1-3	2	3	U2	IgG	40.6
fio1-3	2	4	U2	IgG	34.38
fio1-4	2	1	U2	IgG	40.43
fio1-4	2	2	U2	IgG	32.27
fio1-4	2	3	U2	IgG	37.64
fio1-4	2	4	U2	IgG	38.47
col0	2	1	U2	input	33.66
col0	2	2	U2	input	35.05
col0	2	3	U2	input	38.19
col0	2	4	U2	input	39.68
fio1-1	2	1	U2	input	33.84
fio1-1	2	2	U2	input	38.73
fio1-1	2	3	U2	input	33.9
fio1-1	2	4	U2	input	35.62
fio1-3	2	1	U2	input	32.35
fio1-3	2	2	U2	input
fio1-3	2	3	U2	input	29.56
fio1-3	2	4	U2	input
fio1-4	2	1	U2	input	35.59
fio1-4	2	2	U2	input
fio1-4	2	3	U2	input
fio1-4	2	4	U2	input
