# Supplementary material for: m6A modification of U6 snRNA modulates usage of two major classes of pre-mRNA 5’ splice site
Source: eLife. 2022 Nov 21;11:e78808. doi: 10.7554/eLife.78808 (PMC9803359; doi:10.7554/eLife.78808)
Supplement: Figure 2—source data 4. [file elife-78808-fig2-data4.xlsx]

## Sheet: fip37_vs_col0
Figure 2 source data 4: Differential poly(A) site usage results for fip37-4 and fio1-1 identified using nanopore DRS data
chrom	start	end	gene_id	strand	earth_mover_distance	mean_change_in_tpe	p_val	fdr
1	6787	9130	AT1G01020	-	25.7	-4.4	0.0817	0.196
1	23120	31227	AT1G01040	+	171.8	102.8	0.22	0.365
1	31169	33171	AT1G01050	-	15.2	-7.7	0.00357	0.0219
1	33364	37871	AT1G01060	-	29.6	19	0.375	0.523
1	44969	47059	AT1G01080	-	29	-18.2	0.00271	0.0178
1	47233	49304	AT1G01090	-	31.3	-30.1	0.0813	0.196
1	49908	51210	AT1G01100	-	12.2	-11.3	0.00364	0.0222
1	57163	59215	AT1G01120	-	29.8	27.4	0.148	0.283
1	64165	67774	AT1G01140	-	56.1	-54	0.015	0.0636
1	72338	74096	AT1G01160	+	13.7	-11.7	0.00424	0.025
1	73930	74737	AT1G01170	-	25.9	5.2	1.1e-07	4.23e-06
1	75389	76845	AT1G01180	+	5.1	-3.3	0.863	0.895
1	88621	90502	AT1G01210	+	82.9	70.7	0.0354	0.114
1	91341	95681	AT1G01220	+	28.6	19.3	0.289	0.439
1	97411	99240	AT1G01230	+	8.2	5.8	0.663	0.76
1	99864	101987	AT1G01240	+	14.6	-4.6	0.316	0.466
1	108945	111699	AT1G01260	+	32.1	3.8	0.532	0.658
1	114201	116407	AT1G01290	+	40.2	-30.7	0.69	0.778
1	116783	118845	AT1G01300	+	10.8	-1.3	0.251	0.401
1	121066	130577	AT1G01320	-	113.1	-109.3	0.0281	0.0977
1	136089	138162	AT1G01350	+	84.1	61.8	0.0154	0.0648
1	141869	143261	AT1G01360	+	45.6	44.6	0.232	0.379
1	154366	156178	AT1G01420	-	22.6	21.4	0.217	0.362
1	156476	158823	AT1G01430	-	28.1	-1.1	1.54e-05	0.000299
1	159627	162953	AT1G01440	-	28.9	-26.5	0.12	0.248
1	171524	172948	AT1G01470	-	4.1	1.9	0.216	0.361
1	180016	182749	AT1G01490	-	28.4	-10.2	0.0609	0.163
1	185032	187135	AT1G01500	+	31.8	-24.5	0.135	0.267
1	187144	190472	AT1G01510	+	24	-2.4	0.0203	0.0784
1	195644	198787	AT1G01540	+	107.7	-107.7	0.00348	0.0215
1	199526	201775	AT1G01550	+	4.6	-3.6	0.000211	0.00251
1	221641	224351	AT1G01610	-	13.8	-9.7	0.145	0.279
1	225664	227543	AT1G01620	-	8.7	-7.7	1.51e-08	7.71e-07
1	228798	230979	AT1G01630	+	42.5	-18.2	0.0504	0.144
1	232839	237905	AT1G01650	-	25.9	11.7	0.662	0.76
1	262827	266324	AT1G01710	+	167.6	154	0.00252	0.0168
1	267992	269819	AT1G01720	+	11.1	-9.2	0.279	0.429
1	269791	270859	AT1G01725	-	6.3	-1	0.143	0.276
1	270796	272189	AT1G01730	+	10	-4.2	0.000192	0.00233
1	278599	282891	AT1G01770	+	834.9	752	0.00139	0.0106
1	284349	291203	AT1G01790	+	23.9	6.2	0.146	0.281
1	293245	295086	AT1G01800	+	18	-13.5	2.93e-11	3.61e-09
1	296000	298334	AT1G01820	-	43.3	-39.7	0.0396	0.123
1	304132	306310	AT1G01860	-	13.3	7.5	0.122	0.25
1	313100	316090	AT1G01910	-	64.1	-53.5	0.79	0.848
1	322885	324917	AT1G01940	+	8.2	-2.1	0.0873	0.204
1	325315	330619	AT1G01950	+	30.9	-3.3	0.713	0.795
1	330587	337912	AT1G01960	-	54.3	41.2	0.129	0.26
1	338240	340088	AT1G01970	+	7.7	1.2	0.655	0.754
1	342917	344400	AT1G01990	-	23.9	-17.5	0.101	0.223
1	345515	347603	AT1G02000	+	17.2	16.4	0.534	0.66
1	352611	355124	AT1G02020	-	13.8	-9.3	0.0909	0.209
1	373334	386913	AT1G02080	+	24.3	13.2	0.026	0.093
1	387276	389808	AT1G02090	-	25.5	7	0.627	0.733
1	389811	392816	AT1G02100	+	46.3	-10.3	0.372	0.52
1	395688	400001	AT1G02120	+	78	-70.4	0.177	0.319
1	399982	401919	AT1G02130	-	19.1	-18.1	1.02e-05	0.000211
1	403099	404456	AT1G02140	-	11.6	-6.8	0.00121	0.00958
1	404599	408619	AT1G02145	+	73.8	72.6	0.28	0.429
1	408621	410680	AT1G02150	+	38.1	-33.7	0.0922	0.211
1	410743	411632	AT1G02160	+	19	-17.7	0.066	0.172
1	411663	413554	AT1G02170	+	11	3.9	0.061	0.164
1	418415	422579	AT1G02205	+	37.7	26.6	0.327	0.478
1	443117	446296	AT1G02270	-	30.6	-22.4	1.1e-05	0.000225
1	448422	450426	AT1G02280	-	21.4	-19.3	0.164	0.302
1	450460	452743	AT1G02290	-	25.4	-25.4	0.656	0.755
1	453106	455519	AT1G02300	+	231.1	-164.9	0.0948	0.214
1	455687	458164	AT1G02305	+	14.6	-0.8	0.00132	0.0102
1	461945	463618	AT1G02330	-	10.6	-6.4	0.0373	0.118
1	463753	464981	AT1G02335	-	50	-50	0.0227	0.0848
1	465615	467880	AT1G02340	-	10.6	-10.1	0.0956	0.215
1	469817	470693	AT1G02350	+	133.5	-33.2	0.000187	0.00228
1	474372	476612	AT1G02370	+	9.1	0.4	0.68	0.771
1	486799	489651	AT1G02400	+	130.3	-129.6	0.0218	0.0828
1	490859	492979	AT1G02410	+	26.5	-2.9	0.0013	0.0101
1	513698	515422	AT1G02475	-	47.2	-47	0.00897	0.0439
1	518090	520495	AT1G02500	+	4.1	-2.2	0.0258	0.0926
1	537739	540127	AT1G02560	+	9.1	4	3.07e-05	0.000523
1	553018	556152	AT1G02610	-	10	-8.8	0.679	0.771
1	564017	567771	AT1G02640	+	92.8	-92.8	0.0605	0.163
1	571825	575085	AT1G02660	-	51.1	-51.1	0.00131	0.0101
1	580624	582310	AT1G02680	+	22.1	11.3	0.263	0.413
1	591681	594264	AT1G02720	+	102.2	-102.2	0.0544	0.152
1	602488	604387	AT1G02750	+	32.4	-1.3	0.00204	0.0143
1	607798	609534	AT1G02780	-	11.5	-3.2	0.000145	0.00186
1	621452	623054	AT1G02816	+	11.1	6.9	0.583	0.698
1	623655	624567	AT1G02820	-	3.4	-0.3	0.405	0.551
1	626638	629993	AT1G02840	+	13.4	-0.8	0.0667	0.173
1	630373	633420	AT1G02850	+	14.5	7.7	0.164	0.301
1	635143	637262	AT1G02860	+	30.9	-30.7	0.000641	0.00595
1	637213	638681	AT1G02870	-	7.4	-6.4	0.00282	0.0183
1	642504	644903	AT1G02880	-	22	1.8	0.0321	0.107
1	645083	652001	AT1G02890	-	19.6	1.9	0.457	0.596
1	653603	654457	AT1G02900	-	10.4	-6.1	0.289	0.439
1	655567	658216	AT1G02910	-	27.5	23.5	0.141	0.275
1	658577	659980	AT1G02920	-	8.1	-3.1	0.57	0.687
1	661087	662475	AT1G02930	-	43.1	-26.6	0.0966	0.217
1	666806	669919	AT1G02960	-	8.9	1.4	0.329	0.48
1	681330	687385	AT1G02990	-	47.2	-45.7	0.0175	0.0712
1	687794	692660	AT1G03000	-	24.8	-17.3	0.698	0.784
1	701364	703929	AT1G03030	+	30.6	-11.2	0.0473	0.139
1	703846	706689	AT1G03040	-	16.2	-15.7	0.0952	0.215
1	712439	727553	AT1G03060	-	40.3	39.8	0.00172	0.0125
1	731553	738306	AT1G03080	-	79.2	-67.6	0.347	0.497
1	739543	744184	AT1G03090	+	31.4	30.9	0.0315	0.105
1	748100	749034	AT1G03106	-	5.2	2.6	0.914	0.931
1	749245	751976	AT1G03110	+	24.4	-23.7	0.0179	0.0724
1	753306	754262	AT1G03130	-	3.6	2.3	0.0717	0.181
1	754260	756303	AT1G03140	-	32.2	30.1	0.0155	0.0651
1	756413	758678	AT1G03150	+	12.9	-12.9	0.01	0.0479
1	761260	766194	AT1G03160	+	66.6	-63.3	0.402	0.548
1	786831	788722	AT1G03220	+	10.1	9.3	0.345	0.496
1	789819	791689	AT1G03230	+	9.9	5.9	0.241	0.389
1	793314	795403	AT1G03250	-	14.4	-13.9	0.00437	0.0256
1	795448	798491	AT1G03260	-	8.2	-1.7	0.474	0.609
1	802969	807066	AT1G03280	+	38.9	32.5	0.0821	0.197
1	807360	813216	AT1G03290	+	25.4	10.9	0.00299	0.019
1	813412	816812	AT1G03310	+	12.3	3.5	0.105	0.228
1	817933	819563	AT1G03330	-	2.8	2.6	0.274	0.423
1	822581	824410	AT1G03350	-	14.8	12.4	0.379	0.527
1	824516	826399	AT1G03360	+	28.5	-27.4	2.24e-05	0.000408
1	830549	835411	AT1G03370	+	46.1	-44.1	0.266	0.415
1	835766	841373	AT1G03380	+	40.5	-11.8	0.33	0.48
1	842658	844251	AT1G03400	-	7.2	4.1	0.584	0.699
1	844435	847683	AT1G03410	-	214.1	-208.7	0.0954	0.215
1	845676	847683	AT1G04183	+	14.5	-5.9	0.837	0.878
1	846663	847739	AT1G03420	+	10.2	9.1	0.509	0.639
1	847792	849621	AT1G03430	+	20.2	-17.9	0.000432	0.00433
1	852150	854297	AT1G03440	+	25.1	-13.6	0.68	0.771
1	868852	871308	AT1G03475	-	19.5	11.1	0.343	0.493
1	877860	880259	AT1G03520	-	9	9	0.0787	0.191
1	890154	892492	AT1G03560	-	3.2	2.7	0.885	0.91
1	894237	897718	AT1G03590	-	19.7	-19.5	0.665	0.761
1	898479	899794	AT1G03600	+	8.3	-7.3	0.013	0.0574
1	900731	903070	AT1G03610	+	13.5	-11.7	0.000499	0.00484
1	907522	909650	AT1G03630	+	8.7	-7.1	4.92e-06	0.000113
1	916771	918064	AT1G03680	-	4.3	2.7	0.565	0.683
1	918284	920592	AT1G03687	+	5.7	5.1	0.105	0.228
1	930714	931985	AT1G03730	-	14.2	-14.2	0.119	0.247
1	933425	937152	AT1G03740	+	8.7	5.6	0.614	0.723
1	959789	960916	AT1G03820	-	3.4	-1.3	0.956	0.963
1	975870	977911	AT1G03850	-	30.3	-30.1	0.477	0.612
1	979306	982002	AT1G03860	-	4	-2.2	0.28	0.429
1	982380	983544	AT1G03870	-	2.5	-2.1	0.0454	0.135
1	991105	993126	AT1G03900	+	5.3	5.1	0.0559	0.155
1	996075	1000629	AT1G03910	+	20.3	-3.2	0.00157	0.0116
1	1004687	1008370	AT1G03930	+	16.7	16.3	0.183	0.325
1	1011150	1013365	AT1G03950	-	12.1	6.3	0.648	0.748
1	1018099	1019247	AT1G03970	+	10.4	1.8	0.833	0.876
1	1027852	1029119	AT1G04000	-	164	-163.7	0.0349	0.113
1	1042361	1043887	AT1G04040	-	5.5	-2.8	0.723	0.8
1	1050504	1051194	AT1G04070	-	18.8	-18.6	0.00168	0.0123
1	1051311	1056827	AT1G04080	+	85.3	-38.9	0.312	0.462
1	1064263	1071080	AT1G04120	-	32.5	4.1	0.955	0.962
1	1075542	1080630	AT1G04140	-	11.3	-5.3	0.239	0.387
1	1096881	1099901	AT1G04170	+	30.3	-21.8	1.05e-06	2.93e-05
1	1104492	1106241	AT1G04180	+	27.8	-8.9	0.453	0.593
1	1106353	1108725	AT1G04190	-	19.2	-7.7	0.004	0.0239
1	1109394	1114155	AT1G04200	+	18.6	7.9	0.0872	0.204
1	1114374	1119739	AT1G04210	+	29.5	-26.9	0.645	0.746
1	1128148	1129689	AT1G04240	-	7.9	-4.9	0.00649	0.0346
1	1136077	1138663	AT1G04250	+	9.6	3.1	0.421	0.565
1	1140277	1141564	AT1G04260	-	56.9	55.2	0.337	0.488
1	1141557	1143130	AT1G04270	-	11.1	-8.8	1.05e-12	1.87e-10
1	1143435	1147091	AT1G04280	-	5.4	-4.9	0.548	0.67
1	1147296	1148533	AT1G04290	-	18.4	-16.2	0.000111	0.00151
1	1148563	1154667	AT1G04300	-	47.6	-13.8	0.328	0.479
1	1154739	1157813	AT1G04310	-	57.8	-43.4	0.411	0.556
1	1162904	1164861	AT1G04340	-	9.3	-1.6	0.552	0.674
1	1164909	1167135	AT1G04350	+	11.5	-8.6	0.00168	0.0123
1	1185511	1188696	AT1G04400	-	34.7	32.5	0.0431	0.13
1	1188994	1191458	AT1G04410	-	6.8	1.6	0.731	0.806
1	1191518	1193884	AT1G04420	+	10.3	-7.4	2.72e-08	1.27e-06
1	1197955	1201579	AT1G04430	+	11.8	-4	0.0119	0.0539
1	1202159	1206009	AT1G04440	+	54.8	52.5	0.0409	0.126
1	1215924	1217471	AT1G04480	+	12.9	-12	0.179	0.32
1	1226482	1230947	AT1G04510	+	55.2	-54.7	0.0256	0.0922
1	1234175	1236206	AT1G04530	-	29.6	-21.6	0.0001	0.00139
1	1240293	1242157	AT1G04550	+	2.2	-1.5	0.814	0.864
1	1244946	1246059	AT1G04560	+	3.9	3.9	0.843	0.882
1	1258555	1261470	AT1G04590	-	23.2	23.2	0.00123	0.00966
1	1289733	1291112	AT1G04630	-	22	-21.4	1.23e-09	9.36e-08
1	1292022	1293398	AT1G04640	+	18	-17	2.62e-05	0.000463
1	1303466	1307973	AT1G04680	-	48.2	16.8	0.356	0.505
1	1313442	1315823	AT1G04690	+	31.2	31.1	0.0221	0.0836
1	1321884	1324840	AT1G04710	+	23.9	-9.1	0.157	0.293
1	1331465	1333651	AT1G04750	-	21.8	-20.1	7.52e-07	2.19e-05
1	1336273	1337849	AT1G04770	-	6.7	4.6	0.455	0.594
1	1340552	1343793	AT1G04780	-	28.7	5.1	0.00726	0.0377
1	1344988	1348868	AT1G04790	+	12.4	-6.8	0.623	0.729
1	1348451	1349478	AT1G04800	-	5.3	-2.5	0.987	0.988
1	1350079	1355466	AT1G04810	+	19.6	-2.2	0.00248	0.0166
1	1356083	1358547	AT1G04820	-	18	-8.6	0.0503	0.144
1	1358573	1362019	AT1G04830	-	13.3	4.8	0.911	0.929
1	1365106	1368940	AT1G04850	-	17.3	-10.4	0.266	0.416
1	1369035	1373103	AT1G04860	-	51.4	-48.2	0.0514	0.146
1	1373233	1375821	AT1G04870	-	8.2	0.8	0.923	0.938
1	1387870	1391381	AT1G04910	-	19.5	3.7	0.586	0.7
1	1399173	1403112	AT1G04945	+	69.9	-69	0.242	0.389
1	1399181	1400830	AT1G04940	+	10	-8.6	0.0893	0.206
1	1403084	1407531	AT1G04950	-	46.1	-7.9	0.572	0.689
1	1407771	1410933	AT1G04960	-	8.7	5.9	0.0878	0.205
1	1411087	1413627	AT1G04970	+	11.4	4.3	0.136	0.269
1	1413643	1416218	AT1G04980	-	53.8	-52.7	0.0634	0.168
1	1416341	1419027	AT1G04985	-	40.3	-13	0.421	0.565
1	1418611	1421863	AT1G04990	-	63.2	-17.3	0.696	0.782
1	1425538	1428869	AT1G05000	+	97.3	73.7	0.0807	0.195
1	1431176	1433010	AT1G05010	-	15.8	12.3	0.244	0.392
1	1448630	1450901	AT1G05055	-	42.6	-41.3	0.00105	0.00859
1	1451001	1452872	AT1G05060	-	4.2	-1.2	0.21	0.354
1	1457006	1458802	AT1G05070	-	17.7	-17.3	0.0698	0.178
1	1463107	1464173	AT1G05087	+	62.6	-60.2	0.0245	0.0893
1	1464238	1465875	AT1G05090	+	35.5	-33.9	4.65e-05	0.000749
1	1471322	1476289	AT1G05120	-	15.8	-15.6	0.689	0.777
1	1482545	1484059	AT1G05140	+	47.7	-44.6	0.58	0.695
1	1484066	1486960	AT1G05150	-	27	-23.7	0.2	0.343
1	1487377	1491005	AT1G05160	-	79.5	51.2	0.081	0.195
1	1490973	1494248	AT1G05170	-	36.8	-36.7	0.355	0.505
1	1498113	1501953	AT1G05180	-	19.2	-9.8	0.183	0.325
1	1502250	1503853	AT1G05190	-	27.5	-20.1	1.52e-08	7.73e-07
1	1504940	1509152	AT1G05200	+	30.9	17.2	0.559	0.679
1	1509102	1510341	AT1G05205	-	3.1	0.6	0.18	0.321
1	1531640	1534767	AT1G05270	-	4.3	1.5	0.759	0.826
1	1553567	1557848	AT1G05320	+	18.7	10	0.94	0.951
1	1558777	1559917	AT1G05340	-	4.8	0.5	0.103	0.225
1	1560677	1564409	AT1G05350	-	27.8	0.4	0.0126	0.0562
1	1564490	1567508	AT1G05360	+	126.9	60.4	4.31e-05	0.000703
1	1576821	1582672	AT1G05380	+	57.3	56.6	0.112	0.237
1	1582670	1583760	AT1G05385	-	32.7	-32.3	0.00069	0.0063
1	1594052	1595923	AT1G05430	-	21.8	1.8	0.00431	0.0254
1	1624918	1629289	AT1G05500	+	6.9	2.1	0.68	0.771
1	1630848	1636018	AT1G05520	-	42.6	39.2	0.13	0.262
1	1645299	1647435	AT1G05562	+	59.7	50.8	0.103	0.226
1	1645299	1647435	AT1G05560	-	89.2	-62.8	0.251	0.4
1	1647574	1659611	AT1G05570	-	13.1	-9.8	0.03	0.102
1	1671915	1673923	AT1G05600	+	7.8	-6.4	0.671	0.765
1	1678880	1681710	AT1G05620	+	24.1	23	0.717	0.797
1	1703001	1704838	AT1G05680	-	34.3	-7	0.731	0.806
1	1717388	1718909	AT1G05720	-	15.2	7.9	0.0221	0.0836
1	1730241	1732657	AT1G05785	+	127.5	112.9	0.215	0.36
1	1732801	1737583	AT1G05790	+	44.7	-42.2	0.151	0.287
1	1744443	1747734	AT1G05805	+	145.7	141.6	0.0766	0.188
1	1748258	1749526	AT1G05810	+	181.4	150.2	0.849	0.885
1	1754129	1761909	AT1G05830	+	233.6	232.6	0.162	0.299
1	1762144	1762814	AT1G05835	+	7.8	1.9	0.848	0.885
1	1762733	1766283	AT1G05840	-	24.2	20.7	0.487	0.62
1	1766502	1768837	AT1G05850	-	11.1	-1.9	5.49e-13	1.11e-10
1	1768985	1771286	AT1G05860	+	105.9	-77.8	0.03	0.102
1	1771384	1773385	AT1G05870	-	43.7	-43.7	0.159	0.296
1	1779255	1784675	AT1G05890	+	101.6	80	0.00503	0.0286
1	1786848	1789737	AT1G05900	+	8	4.6	0.823	0.869
1	1790215	1796715	AT1G05910	+	79.3	71.5	0.186	0.329
1	1801109	1804000	AT1G05940	-	15	-10.4	0.778	0.841
1	1807959	1815568	AT1G05960	-	61	49.6	0.0108	0.0505
1	1815824	1817336	AT1G05970	-	16.9	13.9	0.221	0.367
1	1820307	1821894	AT1G06000	-	18.2	15.6	0.0517	0.147
1	1822582	1824236	AT1G06010	+	25.9	5.7	0.297	0.447
1	1828339	1829983	AT1G06040	-	7.2	-7.1	7.35e-08	2.94e-06
1	1832940	1834861	AT1G06060	+	13.8	-13	2.37e-07	8.08e-06
1	1834828	1837758	AT1G06070	-	15	4.8	0.639	0.742
1	1843462	1846311	AT1G06080	+	19.3	10.2	0.233	0.38
1	1853058	1855378	AT1G06110	-	20.8	-3.1	0.0127	0.0567
1	1857756	1860938	AT1G06130	-	34.8	33.7	0.025	0.0906
1	1868988	1873730	AT1G06150	-	14.1	1.3	0.28	0.429
1	1889361	1891276	AT1G06180	+	24.3	-22	0.349	0.499
1	1892230	1894194	AT1G06190	-	13.4	-3.2	0.396	0.543
1	1894288	1897027	AT1G06200	-	10.9	0	0.0364	0.116
1	1897128	1899237	AT1G06210	+	9.5	0.5	0.884	0.91
1	1899950	1904897	AT1G06220	+	54.2	-52.6	0.665	0.761
1	1906962	1911056	AT1G06230	+	29.1	-0.9	0.731	0.806
1	1911094	1913295	AT1G06240	+	199.3	185.2	0.0668	0.173
1	1922207	1926278	AT1G06290	+	9.2	3.4	0.809	0.861
1	1938861	1940496	AT1G06360	-	18.2	-16.3	0.197	0.34
1	1944992	1946303	AT1G06380	+	53.3	-48.6	0.464	0.601
1	1946745	1950860	AT1G06390	+	24.1	-6.7	0.0296	0.102
1	1950595	1952880	AT1G06400	-	25.4	-18	2.1e-06	5.47e-05
1	1954673	1958866	AT1G06410	+	53.8	18.1	0.151	0.287
1	1960030	1963189	AT1G06430	-	5.6	-1.4	0.133	0.265
1	1967086	1969656	AT1G06460	-	29	-2.7	0.0317	0.106
1	1969657	1974526	AT1G06470	+	50.1	-28.2	0.453	0.593
1	1989478	1990730	AT1G06500	+	24.2	-22.9	0.123	0.252
1	1990633	1992228	AT1G06515	-	24.7	-24.7	0.000918	0.00777
1	1992228	1993841	AT1G06510	+	12.8	-9.2	0.0448	0.134
1	2001381	2002802	AT1G06530	+	97.8	-92	0.203	0.347
1	2003626	2007212	AT1G06550	-	24.1	17.6	0.6	0.713
1	2007614	2012006	AT1G06560	+	241.9	-240.2	0.138	0.271
1	2011884	2013545	AT1G06570	-	20.3	-19.1	0.071	0.18
1	2027605	2031388	AT1G06630	+	360.5	360.4	0.0401	0.124
1	2031625	2034112	AT1G06640	+	13.3	-0.4	0.372	0.521
1	2034155	2035824	AT1G06645	+	164.7	-164.1	0.0744	0.185
1	2035717	2037366	AT1G06650	+	47.4	6.7	4.72e-06	0.000109
1	2040409	2047655	AT1G06670	+	49.9	6.2	0.829	0.873
1	2047633	2049439	AT1G06680	+	13.6	-13.2	8.78e-11	9.68e-09
1	2049399	2052170	AT1G06690	-	9.6	2.9	0.137	0.269
1	2052369	2055548	AT1G06700	-	17.4	-11.2	0.00281	0.0182
1	2076503	2077767	AT1G06760	-	4.8	-3.2	0.00721	0.0375
1	2078879	2082097	AT1G06770	-	38.2	36.6	0.0371	0.118
1	2087181	2089786	AT1G06790	+	59.7	-59.7	0.000867	0.00743
1	2092945	2096784	AT1G06820	-	28.8	-28.2	0.326	0.476
1	2097746	2103507	AT1G06840	-	103.9	-103.3	0.141	0.274
1	2108511	2110986	AT1G06870	+	11.6	-10.4	0.0229	0.0854
1	2111322	2114686	AT1G06890	-	20.2	17.2	0.181	0.323
1	2114764	2120745	AT1G06900	-	36.6	-30.3	0.83	0.874
1	2130052	2135703	AT1G06950	-	29.5	-29.5	2.18e-05	0.0004
1	2135809	2137838	AT1G06960	+	45.3	41.4	0.17	0.308
1	2150157	2152541	AT1G07000	-	33	0.5	0.65	0.75
1	2152797	2155269	AT1G07010	+	32.6	8.4	0.65	0.75
1	2155212	2156153	AT1G07020	-	4.6	-3	0.533	0.659
1	2158412	2160818	AT1G07030	-	26.1	-7.6	0.14	0.274
1	2160918	2163387	AT1G07040	-	10	-9.8	0.00879	0.0433
1	2168560	2169957	AT1G07070	+	52.5	30.6	0.111	0.236
1	2169976	2172194	AT1G07080	+	21.9	-20.1	0.56	0.68
1	2173951	2174894	AT1G07090	-	14.8	10.4	0.115	0.241
1	2178021	2184193	AT1G07110	-	14.9	0.8	0.233	0.38
1	2189876	2190784	AT1G07135	-	23.2	22.7	0.17	0.308
1	2191678	2193836	AT1G07140	-	16.5	7	0.00111	0.00897
1	2199996	2201272	AT1G07170	+	7.2	-1.7	0.0483	0.14
1	2204103	2207099	AT1G07180	+	5	-4.7	0.261	0.411
1	2208476	2212718	AT1G07200	-	19.3	3.1	0.138	0.271
1	2215215	2216982	AT1G07210	+	7	2.2	0.793	0.85
1	2220180	2223018	AT1G07230	-	33.4	32	0.00649	0.0346
1	2223624	2225524	AT1G07240	+	10.9	-2.3	0.0522	0.148
1	2225758	2227608	AT1G07250	+	9.3	-2.6	0.563	0.682
1	2238016	2241471	AT1G07280	+	9.4	-0.7	0.789	0.848
1	2247111	2248961	AT1G07310	-	62	41	0.579	0.695
1	2248966	2250529	AT1G07320	+	23	-21.5	3.38e-09	2.18e-07
1	2257383	2260187	AT1G07350	-	13.1	2.6	0.706	0.789
1	2260316	2262923	AT1G07360	-	11.1	-6.6	0.00519	0.0292
1	2263036	2264553	AT1G07370	+	19.1	-4.8	0.0851	0.201
1	2264633	2269121	AT1G07380	-	38.4	33.6	0.0377	0.119
1	2277554	2280502	AT1G07420	+	6.3	6	0.116	0.243
1	2286184	2287791	AT1G07440	-	12.1	-0.8	0.613	0.722
1	2291368	2294558	AT1G07470	+	20.5	-11.9	0.595	0.708
1	2296022	2299544	AT1G07480	-	30.2	-24.1	0.302	0.452
1	2304434	2312399	AT1G07510	+	110.7	105.9	0.106	0.23
1	2309533	2312385	AT1G07520	-	40.7	-40.4	0.154	0.29
1	2313580	2316507	AT1G07530	-	4.8	2.3	0.952	0.96
1	2331135	2333767	AT1G07570	-	201.2	168	0.0974	0.218
1	2336476	2339391	AT1G07590	-	4	-3.4	0.00227	0.0155
1	2338903	2339321	AT1G07600	-	2	-1.4	0.146	0.281
1	2341446	2342148	AT1G07610	+	9.3	9.2	0.749	0.819
1	2348914	2351799	AT1G07630	+	11.7	-11.6	0.254	0.404
1	2353030	2356413	AT1G07640	-	74.3	73.8	0.977	0.98
1	2359110	2366736	AT1G07650	-	251	203.4	0.00791	0.0402
1	2368832	2369735	AT1G07660	+	2.4	1.7	0.44	0.582
1	2370019	2374607	AT1G07670	-	146.9	138.9	0.0907	0.209
1	2379594	2381390	AT1G07700	+	24.9	-24.6	8.59e-08	3.37e-06
1	2381554	2386157	AT1G07705	+	44	8.1	0.418	0.562
1	2390530	2392628	AT1G07720	-	10.3	7.7	0.771	0.835
1	2394984	2397399	AT1G07728	+	25.8	-25.7	0.00753	0.0388
1	2403991	2406049	AT1G07750	-	96.5	-95.2	0.859	0.893
1	2407410	2409697	AT1G07770	-	10.7	-1.1	0.113	0.238
1	2409864	2412777	AT1G07780	-	49.6	-49.6	1.65e-06	4.36e-05
1	2412937	2413790	AT1G07790	+	4.5	-2.3	0.486	0.619
1	2416177	2420829	AT1G07810	+	22.2	-17.9	0.00656	0.0349
1	2421088	2422066	AT1G07820	-	15.3	-14.1	0.255	0.404
1	2422125	2423803	AT1G07830	+	9	-6.8	0.0307	0.104
1	2424044	2426728	AT1G07840	+	105.9	-89.4	0.544	0.667
1	2428772	2432091	AT1G07870	-	43.6	-43.6	0.0311	0.105
1	2437280	2439665	AT1G07890	+	2.5	-0.1	0.68	0.771
1	2443917	2445140	AT1G07902	+	77.4	76.4	0.165	0.302
1	2454770	2457321	AT1G07920	+	13.6	7.6	7.84e-05	0.00114
1	2458183	2460817	AT1G07930	+	12.1	-10.6	0.0875	0.204
1	2462948	2465545	AT1G07940	-	8	2	0.197	0.34
1	2465728	2467165	AT1G07950	-	14.1	-1.2	0.000664	0.00612
1	2467144	2469316	AT1G07960	+	16.5	-12.2	0.204	0.348
1	2469217	2472806	AT1G07970	-	86.2	-84.3	0.431	0.574
1	2473164	2475128	AT1G07980	-	8.7	-0.6	0.46	0.598
1	2476952	2483196	AT1G07990	+	48.5	-21.3	0.0711	0.18
1	2485847	2488085	AT1G08010	-	12.1	12	0.0378	0.119
1	2489408	2493327	AT1G08030	-	7.7	6.8	0.753	0.823
1	2495308	2498764	AT1G08040	-	18.8	13.4	0.388	0.536
1	2535250	2537932	AT1G08110	+	40	6.1	0.000857	0.00736
1	2538073	2538238	AT1G08115	-	2.1	0.6	0.525	0.653
1	2539613	2542362	AT1G08125	-	13.3	-6.5	0.627	0.733
1	2542662	2547946	AT1G08130	-	45.8	43.9	0.394	0.541
1	2564360	2565318	AT1G08180	-	10.9	4.9	0.383	0.531
1	2567419	2573448	AT1G08190	+	30.9	-25	0.0128	0.057
1	2573817	2576844	AT1G08200	-	13.4	-2.8	0.0481	0.14
1	2576983	2580754	AT1G08210	-	31.5	30.5	0.341	0.492
1	2581021	2583390	AT1G08220	-	26.2	-25.3	0.136	0.268
1	2583593	2586969	AT1G08230	-	503.8	-503.8	0.00142	0.0107
1	2588775	2590609	AT1G08250	-	10.7	-2.6	0.145	0.278
1	2607876	2609971	AT1G08280	+	55.8	-46	0.055	0.153
1	2620334	2621545	AT1G08315	-	11.7	-1.2	0.628	0.734
1	2635938	2638004	AT1G08360	+	5.1	-1.2	5.06e-08	2.16e-06
1	2638036	2640663	AT1G08370	+	20.9	8.6	0.000569	0.00541
1	2640802	2641934	AT1G08380	-	7.1	-6	2.51e-05	0.000447
1	2642071	2643285	AT1G08390	+	11.9	9.3	0.473	0.608
1	2649458	2657120	AT1G08420	+	71.1	70.9	0.537	0.662
1	2667797	2671957	AT1G08450	-	18.7	-9.1	0.249	0.398
1	2672197	2674721	AT1G08460	+	8.8	-3.9	0.697	0.783
1	2675812	2679824	AT1G08465	+	16.1	-10.8	0.917	0.933
1	2682057	2684171	AT1G08470	-	23.4	-21.9	0.00257	0.017
1	2684175	2685702	AT1G08480	+	14.4	-14.3	1.22e-07	4.57e-06
1	2685658	2688658	AT1G08490	-	37.2	-37.2	2.53e-07	8.48e-06
1	2691061	2694547	AT1G08510	-	48	-46.8	0.0762	0.188
1	2696380	2701022	AT1G08520	+	19.8	15.3	0.0518	0.147
1	2700980	2703162	AT1G08530	+	56.5	-43.9	0.901	0.921
1	2703294	2706860	AT1G08540	+	39.7	-9.5	0.36	0.509
1	2706867	2709988	AT1G08550	+	23.1	14.2	0.117	0.243
1	2712693	2714833	AT1G08570	+	5.7	-2.2	0.0419	0.128
1	2714993	2716532	AT1G08580	-	11.9	-8.4	0.0201	0.0778
1	2723676	2733613	AT1G08600	+	116.3	115.7	0.773	0.837
1	2736655	2743881	AT1G08620	+	397	-373.2	0.0851	0.201
1	2743760	2747967	AT1G08630	-	43.4	43.1	0.194	0.337
1	2748360	2751620	AT1G08640	-	21	-21	0.0048	0.0276
1	2752123	2753809	AT1G08650	+	11.8	1.1	0.888	0.913
1	2756903	2759889	AT1G08660	-	34.8	-5.3	0.0744	0.185
1	2762583	2768967	AT1G08680	+	31.4	-28.1	0.867	0.898
1	2769614	2771477	AT1G08700	-	60.2	48.7	0.924	0.939
1	2773940	2779308	AT1G08720	+	32.1	-21	0.723	0.8
1	2801041	2804711	AT1G08750	+	28.3	-25.7	0.223	0.368
1	2808759	2809775	AT1G08770	+	9.4	-4.2	0.000166	0.00209
1	2809777	2811313	AT1G08780	-	6.2	-3.3	0.0983	0.219
1	2819064	2820478	AT1G08810	-	20.4	-19.8	0.46	0.598
1	2821353	2825481	AT1G08820	-	68	67.9	0.0737	0.184
1	2827059	2829315	AT1G08830	+	4.6	3.4	0.2	0.343
1	2839051	2841134	AT1G08845	+	18.4	-4.6	0.022	0.0833
1	2846893	2848100	AT1G08880	-	19	-18.1	0.46	0.599
1	2848148	2852270	AT1G08890	+	44.5	29.6	0.524	0.652
1	2852362	2855941	AT1G08900	+	97	-96.7	0.0843	0.2
1	2856161	2861170	AT1G08910	+	105.7	-30.6	0.253	0.403
1	2867202	2870745	AT1G08920	+	10.4	-6.5	0.895	0.917
1	2873299	2877261	AT1G08930	+	10.3	-4.1	0.0303	0.103
1	2877429	2879169	AT1G08940	+	35.5	-35.5	0.0675	0.174
1	2882490	2884342	AT1G08970	+	21.2	14	0.0943	0.213
1	2884350	2886621	AT1G08980	+	17.3	17.2	7.97e-05	0.00116
1	2895165	2899446	AT1G09010	-	30.8	4	0.267	0.417
1	2899775	2904862	AT1G09020	-	44.1	-43.9	0.223	0.368
1	2921063	2925826	AT1G09060	-	21	-4.7	0.379	0.527
1	2927501	2929107	AT1G09070	+	6.8	-6.8	0.0289	0.0997
1	2936527	2939363	AT1G09100	-	7.9	-6.3	0.692	0.779
1	2939567	2942345	AT1G09130	-	20.6	-1.5	1.45e-05	0.000285
1	2942537	2945976	AT1G09140	-	47.9	-15.6	0.275	0.424
1	2946029	2949159	AT1G09150	+	10.2	-2.7	0.24	0.388
1	2952596	2955745	AT1G09160	-	21.8	-7.7	0.762	0.828
1	2971570	2972334	AT1G09200	-	1.2	-0.3	0.754	0.823
1	2972637	2977002	AT1G09210	-	8.7	6.6	0.498	0.63
1	2979510	2982713	AT1G09230	-	22.6	-7.1	0.234	0.382
1	2984828	2986231	AT1G09240	+	22.5	-17.3	0.141	0.275
1	2989140	2990427	AT1G09250	+	7.3	-4.6	0.0982	0.218
1	2994330	2998222	AT1G09270	+	8.8	-2	0.694	0.781
1	3001438	3003762	AT1G09290	-	14.5	-4.5	0.000188	0.00229
1	3008909	3009898	AT1G09310	+	5.3	5.2	0.0467	0.138
1	3012738	3015255	AT1G09330	-	15.9	-12.5	0.182	0.324
1	3015236	3018542	AT1G09340	+	21.6	-10.6	5.62e-18	2.72e-15
1	3031045	3033582	AT1G09390	+	41.8	-34.8	0.761	0.828
1	3037753	3038408	AT1G09415	-	4.6	2.3	0.564	0.683
1	3041995	3045541	AT1G09430	+	16.2	-11	0.00632	0.034
1	3063935	3065949	AT1G09490	+	11.2	-10.4	0.0271	0.0956
1	3066673	3068796	AT1G09500	+	15.8	8.3	0.0009	0.00765
1	3070914	3072074	AT1G09520	-	19.2	18.5	0.0087	0.043
1	3075767	3079654	AT1G09530	+	40.2	-35.2	0.522	0.65
1	3093643	3094954	AT1G09560	+	27.2	19.6	0.436	0.579
1	3095159	3100819	AT1G09570	-	19.1	0.6	0.000262	0.00299
1	3101148	3103677	AT1G09575	-	3.8	1.4	0.894	0.916
1	3104491	3106366	AT1G09580	+	7.9	-1.5	0.531	0.657
1	3106366	3107801	AT1G09590	+	15.1	-10.1	0.207	0.352
1	3112777	3116699	AT1G09620	-	54.3	27.4	0.00219	0.0151
1	3118154	3119815	AT1G09630	-	12.1	-9.1	0.00163	0.012
1	3119738	3122542	AT1G09640	+	10.3	1.7	0.0163	0.0678
1	3122925	3124667	AT1G09645	+	24.3	-21.2	0.00694	0.0364
1	3127761	3131094	AT1G09660	-	7.9	5.6	0.0438	0.132
1	3136187	3137684	AT1G09690	-	11.1	-0.6	0.175	0.315
1	3147636	3154404	AT1G09730	-	98.6	77.6	0.0749	0.186
1	3154414	3156376	AT1G09740	+	17.9	-1.4	0.0373	0.118
1	3157500	3159148	AT1G09750	+	13	10.1	0.000227	0.00267
1	3159124	3161692	AT1G09760	-	17.7	-14.1	0.0671	0.174
1	3161831	3165616	AT1G09770	+	23.8	3.3	0.0204	0.0788
1	3165369	3167924	AT1G09780	-	67.1	63.9	0.0789	0.192
1	3173533	3176910	AT1G09795	+	15.3	-3	0.334	0.484
1	3176882	3180734	AT1G09800	-	65.1	-65.1	0.0847	0.2
1	3180547	3180736	AT1G04733	-	31.2	-31.1	0.14	0.273
1	3180925	3184224	AT1G09810	-	48.5	-48.5	0.147	0.281
1	3189300	3190242	AT1G09815	+	4.7	-3.9	0.00467	0.027
1	3192567	3195044	AT1G09830	-	7.5	5	0.888	0.913
1	3195718	3200403	AT1G09840	-	46.9	2.4	0.136	0.268
1	3201684	3204150	AT1G09850	+	76.3	71.8	0.0668	0.173
1	3205578	3208714	AT1G09870	+	20.3	-20.2	0.528	0.655
1	3218132	3219929	AT1G09900	+	4.8	-3.5	0.0108	0.0505
1	3220034	3224541	AT1G09910	-	243.5	-243.3	0.176	0.317
1	3224683	3227083	AT1G09920	-	7.3	-6.8	0.00589	0.0323
1	3236907	3239554	AT1G09940	-	24.3	13.4	0.227	0.373
1	3252097	3255782	AT1G09970	+	8.6	-8.2	0.309	0.46
1	3256188	3261741	AT1G09980	-	45.3	41.6	0.196	0.339
1	3262221	3263642	AT1G09995	-	59.7	35.8	0.0359	0.115
1	3269538	3272110	AT1G10020	-	18.8	-16.6	0.256	0.406
1	3273752	3275953	AT1G10030	+	35	-22.4	0.01	0.0478
1	3284072	3287292	AT1G10060	+	29.4	-27.5	0.683	0.773
1	3290310	3296198	AT1G10090	-	73.6	39.6	0.36	0.509
1	3304038	3306956	AT1G10120	-	49.9	8.3	0.381	0.529
1	3310929	3322269	AT1G10130	+	71.6	-40.2	0.739	0.812
1	3322553	3323735	AT1G10140	-	10.4	-10.1	0.0905	0.208
1	3325798	3327614	AT1G10150	+	4.4	-1.1	0.268	0.417
1	3333503	3338188	AT1G10170	-	23.1	-3.7	0.00241	0.0162
1	3338184	3341628	AT1G10180	-	56.3	-56.1	0.0784	0.191
1	3346382	3348139	AT1G10200	-	5.2	5.2	0.0575	0.158
1	3349081	3351180	AT1G10210	+	22.2	-18.1	0.0913	0.209
1	3355674	3356151	AT1G10230	+	17.5	-7.9	0.035	0.113
1	3370401	3377463	AT1G10290	+	43.7	-13.6	0.0374	0.118
1	3381446	3384003	AT1G10310	-	23.8	-5.6	0.0867	0.203
1	3392942	3395181	AT1G10350	-	25.7	-5.5	0.647	0.748
1	3395550	3396953	AT1G10360	-	12.6	-11.3	0.393	0.54
1	3396882	3398358	AT1G10370	-	26.4	-25.8	0.257	0.407
1	3400553	3402420	AT1G10380	+	9.6	3.1	0.989	0.99
1	3406955	3412874	AT1G10390	-	6.6	-6.6	0.111	0.235
1	3416429	3419691	AT1G10410	-	24.5	-15.3	0.0228	0.0853
1	3428477	3430636	AT1G10430	-	5.6	4.3	0.265	0.414
1	3431763	3438370	AT1G10450	+	89	87.2	0.269	0.418
1	3441987	3444360	AT1G10470	-	10.4	6.6	0.0267	0.0946
1	3453190	3460620	AT1G10490	+	144.2	-140	0.118	0.245
1	3459999	3461485	AT1G10500	-	5.7	5.6	0.0521	0.148
1	3461634	3465786	AT1G10510	+	54.4	-54.3	0.167	0.306
1	3469511	3471488	AT1G10522	+	523.6	-523.5	4.58e-08	1.98e-06
1	3487385	3491277	AT1G10570	+	177.4	-177.4	0.0355	0.114
1	3491257	3493834	AT1G10580	-	29.7	7.5	0.0415	0.127
1	3501987	3503544	AT1G10590	-	14.4	-14.2	4.94e-08	2.12e-06
1	3503639	3506159	AT1G10600	+	990.2	913.9	0.000116	0.00155
1	3512738	3514824	AT1G10630	-	9.5	9.3	0.0277	0.0969
1	3515181	3518035	AT1G10640	-	41.8	32.7	0.0263	0.0936
1	3523985	3526531	AT1G10650	-	16.9	-5.8	0.0444	0.133
1	3530352	3532017	AT1G10657	+	26.2	14.6	0.0326	0.108
1	3532228	3535137	AT1G10660	+	5.1	-2.2	0.88	0.907
1	3535287	3538309	AT1G10670	+	13.4	12.4	0.0165	0.0683
1	3544912	3545614	AT1G10682	-	3.8	-2.2	0.0195	0.0763
1	3549919	3550848	AT1G10690	-	8.5	4.8	0.628	0.734
1	3554103	3556544	AT1G10700	+	21.9	-10.8	0.000436	0.00435
1	3562840	3564850	AT1G10720	+	21.8	-9	0.0442	0.133
1	3565256	3568106	AT1G10730	+	54.4	-54.3	0.47	0.606
1	3567904	3571053	AT1G10740	-	7.5	-6.9	0.167	0.305
1	3580829	3590928	AT1G10760	-	42.5	-5.7	0.65	0.75
1	3600909	3605076	AT1G10820	-	37.4	2.1	0.666	0.762
1	3605511	3607580	AT1G10830	-	9.3	2.6	0.131	0.263
1	3607630	3610616	AT1G10840	-	10.8	-6.1	4.05e-06	9.61e-05
1	3611489	3614613	AT1G10850	+	33.2	8.2	0.293	0.443
1	3614512	3616308	AT1G10865	-	4.8	-4.2	0.0402	0.124
1	3616609	3623806	AT1G10870	-	12.1	-6.4	0.2	0.343
1	3627645	3630808	AT1G10890	+	239.7	235	0.0435	0.131
1	3632131	3637250	AT1G10900	-	12.1	1.8	0.0277	0.0969
1	3639834	3644187	AT1G10910	+	46.8	6.9	0.00584	0.0321
1	3644179	3647784	AT1G10920	-	68.2	-38	0.978	0.981
1	3655672	3658612	AT1G10940	-	70.4	-58.3	0.00175	0.0127
1	3659203	3664264	AT1G10950	+	86.6	72.9	0.0214	0.0818
1	3664186	3665040	AT1G10960	+	7.9	5.8	0.142	0.275
1	3676690	3678567	AT1G11020	+	10	-3.2	0.00207	0.0145
1	3681887	3684169	AT1G11050	+	57.7	15.7	0.0606	0.163
1	3694327	3698013	AT1G11080	-	9.3	-9.2	0.446	0.587
1	3702607	3703779	AT1G11090	+	8.1	-7.6	0.143	0.277
1	3722707	3727450	AT1G11130	+	22.5	-22.5	0.00691	0.0363
1	3744857	3745655	AT1G11175	+	58.5	-58	0.404	0.55
1	3745773	3748557	AT1G11180	+	32.9	9.4	0.63	0.735
1	3753212	3755658	AT1G11200	+	4.5	3.2	0.514	0.643
1	3766753	3769799	AT1G11240	-	22.3	-18.3	0.254	0.403
1	3777235	3780823	AT1G11260	+	16.8	-10.5	0.00352	0.0217
1	3780385	3787099	AT1G11270	-	963	960.9	0.0331	0.109
1	3787317	3790935	AT1G11280	-	20.4	-17.3	0.463	0.601
1	3800499	3804233	AT1G11310	-	4.4	-4	0.645	0.747
1	3809794	3813809	AT1G11330	+	39.3	-13.7	0.501	0.633
1	3817423	3820887	AT1G11350	-	14.7	-6.8	0.0127	0.0567
1	3821105	3823088	AT1G11360	-	61.7	-9.9	0.145	0.28
1	3832562	3834462	AT1G11380	+	15.2	-5.3	0.368	0.516
1	3834431	3837676	AT1G11390	-	21.6	4.1	0.958	0.964
1	3837693	3841218	AT1G11400	+	32.2	-18	1.26e-08	6.64e-07
1	3840876	3844479	AT1G11410	+	45	-44.4	0.544	0.668
1	3847219	3849224	AT1G11430	+	21.1	-18.1	0.319	0.469
1	3849200	3850735	AT1G11440	+	16	-11.7	0.535	0.66
1	3862398	3864074	AT1G11475	+	6.1	-2.4	0.0028	0.0182
1	3864042	3867000	AT1G11480	-	11.1	1.3	0.115	0.241
1	3874395	3875484	AT1G11530	+	5.8	2.4	0.111	0.236
1	3878494	3880391	AT1G11545	-	67.4	-65.5	0.06	0.162
1	3888609	3890824	AT1G11580	+	6.3	-5.1	0.191	0.333
1	3895178	3896934	AT1G11592	-	33.8	-6.1	0.0665	0.173
1	3901949	3903895	AT1G11600	+	3	0.3	0.966	0.971
1	3912753	3914465	AT1G11630	-	32.2	-32.2	0.00848	0.0423
1	3914773	3918243	AT1G11650	+	17.6	-6	0.14	0.273
1	3920477	3924566	AT1G11660	+	25	-24.5	0.0745	0.185
1	3938421	3940871	AT1G11680	+	8.7	-5.7	0.00178	0.0129
1	3945583	3946757	AT1G11700	+	18	-2.1	0.731	0.806
1	3951365	3957044	AT1G11720	+	202.4	-129.9	0.0734	0.184
1	3967475	3969877	AT1G11750	+	23	-18.4	0.309	0.459
1	3969680	3971911	AT1G11755	-	12.1	5.4	0.492	0.624
1	3971985	3973294	AT1G11760	-	20.2	-17.1	0.019	0.075
1	3981152	3985219	AT1G11790	+	12.1	11.4	0.154	0.29
1	3991026	3993707	AT1G11820	-	5.4	-2.4	0.582	0.697
1	3995157	3997965	AT1G11840	+	15.5	-15.2	1.73e-07	6.22e-06
1	3999156	4000024	AT1G11850	+	14.4	-10.8	0.196	0.339
1	4001112	4003748	AT1G11860	+	12	8.7	0.0191	0.075
1	4003756	4007015	AT1G11870	+	19	-18.8	0.000522	0.00501
1	4010756	4013104	AT1G11890	+	49.3	36	0.0403	0.124
1	4014781	4016544	AT1G11905	+	21.3	-18.9	0.000602	0.00566
1	4016711	4021043	AT1G11910	-	9.1	-8.1	0.145	0.279
1	4028594	4030656	AT1G11930	+	19.3	10.6	0.11	0.234
1	4039565	4044046	AT1G11960	-	18.1	9.9	0.00167	0.0122
1	4049895	4053871	AT1G12000	-	15.3	-2.5	0.0743	0.185
1	4061362	4063549	AT1G12020	-	47	-29.3	0.543	0.667
1	4072740	4076207	AT1G12050	+	14	-11.7	0.0135	0.0589
1	4089663	4090857	AT1G12090	-	3.5	-2.2	0.174	0.315
1	4105222	4109601	AT1G12110	+	69.6	-21	0.113	0.238
1	4114673	4117614	AT1G12120	-	17.4	-14.4	0.0603	0.163
1	4121284	4124595	AT1G12140	+	55.3	-54.5	0.306	0.457
1	4137510	4140158	AT1G12200	+	8.2	3.8	0.192	0.334
1	4147961	4151056	AT1G12230	+	32.9	16.4	0.00016	0.00203
1	4153640	4157653	AT1G12240	+	37	-3.3	0.152	0.288
1	4157653	4159046	AT1G12244	+	39.6	2.8	0.881	0.907
1	4159226	4161506	AT1G12250	+	17.2	-15.2	9.78e-09	5.37e-07
1	4172034	4174730	AT1G12270	+	7	-3	0.516	0.645
1	4186623	4190342	AT1G12320	+	477.2	-476.2	0.267	0.417
1	4186652	4188233	AT1G12310	-	4.9	-2.9	0.403	0.549
1	4194419	4196749	AT1G12330	+	16.3	7.2	0.17	0.308
1	4198336	4200849	AT1G12350	+	20.3	-16.4	0.00253	0.0168
1	4200863	4206486	AT1G12360	+	40.7	8.3	0.148	0.283
1	4220043	4221803	AT1G12390	+	30.4	-26.9	1.77e-07	6.32e-06
1	4221778	4222875	AT1G12400	+	19	-18.6	0.00847	0.0423
1	4223029	4225254	AT1G12410	+	20.8	-12.1	1.29e-12	2.2e-10
1	4233716	4238795	AT1G12430	-	44.4	-24.3	0.907	0.925
1	4241420	4243229	AT1G12440	-	5.6	-1.1	0.0131	0.0577
1	4243903	4245993	AT1G12450	+	11	-3.4	0.797	0.853
1	4247217	4250758	AT1G12460	+	65.7	36.3	0.15	0.285
1	4250944	4257392	AT1G12470	+	23.1	-10.5	0.00861	0.0428
1	4263149	4265156	AT1G12500	-	35.4	-35.4	0.00192	0.0136
1	4267073	4268982	AT1G12520	-	5.4	0.4	0.308	0.458
1	4268985	4270907	AT1G12530	-	42.2	-38.1	0.00267	0.0176
1	4282793	4285876	AT1G12580	+	22.2	-22.2	1.65e-10	1.69e-08
1	4303279	4305907	AT1G12640	-	14.7	8.2	0.785	0.845
1	4305790	4308007	AT1G12650	+	26.1	20.7	0.0246	0.0897
1	4319876	4323265	AT1G12680	-	32.6	6.6	0.0303	0.103
1	4344942	4348390	AT1G12750	-	148.5	-143	0.135	0.267
1	4348497	4350993	AT1G12760	+	57	24.6	0.0356	0.114
1	4351018	4353797	AT1G12770	+	21.5	-20.7	0.219	0.365
1	4355925	4358894	AT1G12780	-	18.4	17.3	0.801	0.856
1	4361550	4365414	AT1G12800	-	17.9	0.3	0.603	0.715
1	4367255	4368822	AT1G12810	+	7	-1.4	0.304	0.455
1	4368759	4371298	AT1G12820	-	9.6	-6.8	0.0507	0.145
1	4374204	4378514	AT1G12840	+	4.1	1.4	0.853	0.888
1	4374248	4375247	AT1G12830	-	19.8	-19.7	0.515	0.645
1	4378831	4379607	AT1G12845	-	7	-1.3	0.302	0.452
1	4379693	4381764	AT1G12850	-	7.6	-0.9	0.224	0.37
1	4384303	4386651	AT1G12860	+	15.8	-6.3	0.0955	0.215
1	4392437	4394454	AT1G12900	-	8.5	-5.2	0.00138	0.0105
1	4394896	4396291	AT1G12910	-	3.2	0.6	0.405	0.551
1	4396347	4398193	AT1G12920	-	9.3	1.6	0.613	0.722
1	4398321	4405669	AT1G12930	-	89.8	-58.7	0.565	0.683
1	4423539	4425936	AT1G12970	+	33.9	31.8	0.842	0.882
1	4433604	4436102	AT1G12990	+	22.3	-21.1	0.0588	0.16
1	4436100	4439639	AT1G13000	-	25.5	-8.2	0.727	0.804
1	4440403	4443954	AT1G13020	-	67.1	-48.2	0.0208	0.0798
1	4452189	4454900	AT1G13060	+	6.9	0.3	0.29	0.44
1	4459001	4460996	AT1G13080	+	18.6	-18.6	0.000454	0.00449
1	4461737	4463469	AT1G13090	+	7.9	-6.6	0.00356	0.0218
1	4467093	4469033	AT1G13110	+	4.9	0.5	0.0708	0.179
1	4469143	4473319	AT1G13120	-	88.8	88.5	0.269	0.418
1	4480859	4481334	AT1G13145	+	25.9	-23	0.621	0.727
1	4498763	4501624	AT1G13190	+	131	-123.3	0.0801	0.194
1	4501580	4503676	AT1G13195	-	46.7	45.6	1.34e-05	0.000267
1	4508905	4514010	AT1G13210	-	92	85.2	0.164	0.302
1	4525413	4526204	AT1G13245	-	8.6	-1.6	0.0212	0.0813
1	4528484	4530222	AT1G13250	-	6.8	-3.4	0.663	0.76
1	4542167	4543970	AT1G13260	+	5	0	0.803	0.857
1	4544888	4547373	AT1G13270	+	53.9	17.7	0.064	0.168
1	4547387	4548894	AT1G13280	+	11.6	-11.4	0.0321	0.107
1	4563427	4567849	AT1G13320	-	44.4	42.6	0.012	0.0542
1	4572303	4576711	AT1G13350	-	18.5	15.4	0.417	0.562
1	4576872	4578369	AT1G13360	-	3	-1	0.877	0.905
1	4588993	4590501	AT1G13380	-	13.1	3.1	7.43e-05	0.00109
1	4592303	4594468	AT1G13390	-	20.2	-20.1	0.018	0.0726
1	4608076	4610878	AT1G13440	-	9.9	-9.6	0.147	0.281
1	4612730	4615353	AT1G13450	-	131.1	-113.8	0.471	0.607
1	4615766	4618449	AT1G13460	+	42.2	-40.5	0.282	0.432
1	4638467	4642190	AT1G13560	-	29.6	17.6	0.00325	0.0204
1	4642123	4644422	AT1G13570	-	58.7	-57.9	0.758	0.826
1	4644520	4647142	AT1G13580	-	51.2	-47.1	0.246	0.395
1	4677003	4679862	AT1G13640	-	16.2	-14.1	0.873	0.902
1	4680289	4682382	AT1G13650	-	42.4	-35.8	0.0309	0.104
1	4688017	4689265	AT1G13670	+	5	0.2	0.852	0.888
1	4693281	4694410	AT1G13690	+	77.2	-74.1	0.449	0.589
1	4694371	4696023	AT1G13700	-	19.5	-18	0.182	0.324
1	4709756	4712672	AT1G13730	+	18.8	-13.8	0.347	0.497
1	4713432	4715407	AT1G13740	+	17.1	-15.7	0.794	0.851
1	4721573	4724520	AT1G13770	+	1.8	-0.7	0.729	0.805
1	4735473	4737910	AT1G13820	+	59.8	-58.2	8.9e-05	0.00127
1	4743203	4746956	AT1G13860	-	122.6	-122.5	0.000802	0.00701
1	4747185	4748666	AT1G13870	-	8.4	-7.7	0.419	0.563
1	4748830	4751234	AT1G13880	+	10.9	-10.4	0.2	0.343
1	4753098	4755656	AT1G13900	-	39.2	-3.1	0.164	0.302
1	4755776	4758076	AT1G13910	+	6	3.9	0.374	0.522
1	4760956	4762666	AT1G13930	+	1.9	0.8	0.192	0.334
1	4762478	4766852	AT1G13940	-	15.1	12.4	0.609	0.72
1	4773433	4774935	AT1G13950	+	9.6	2.9	0.122	0.251
1	4776282	4779420	AT1G13960	+	23.4	17.5	0.00406	0.0242
1	4788462	4794654	AT1G13980	+	24.7	-21.1	0.931	0.944
1	4794663	4796599	AT1G13990	+	3.9	1.4	0.82	0.868
1	4797357	4800283	AT1G14000	+	30.3	-3.6	0.0181	0.0726
1	4800168	4801850	AT1G14010	-	14	-10.8	0.000745	0.00662
1	4805305	4807517	AT1G14030	-	8.9	5.6	0.36	0.509
1	4816927	4818112	AT1G14060	-	10	-1.6	0.791	0.849
1	4833395	4835089	AT1G14120	-	4.8	-0.9	0.986	0.987
1	4835723	4837771	AT1G14130	-	9.8	-4.2	0.654	0.753
1	4837926	4839633	AT1G14140	-	8.1	-7.9	0.0468	0.138
1	4839800	4840823	AT1G14150	+	13.4	-13.4	1.57e-05	0.000302
1	4842274	4842469	AT1G05057	+	5.6	-5	0.0789	0.192
1	4843183	4845913	AT1G14170	-	40	-40	0.00169	0.0123
1	4855532	4856762	AT1G14205	+	39.5	-39.3	0.0301	0.102
1	4856777	4857975	AT1G14210	-	6.1	2.3	0.858	0.891
1	4861167	4864094	AT1G14230	+	28.4	-19.6	0.25	0.4
1	4868345	4871488	AT1G14250	+	25.4	-22.9	0.877	0.905
1	4874874	4877256	AT1G14270	-	30	-29.8	0.00242	0.0163
1	4877505	4879307	AT1G14280	+	20.7	-20.6	0.00435	0.0256
1	4880029	4882265	AT1G14290	-	18.4	-14.8	0.0116	0.0531
1	4882335	4884818	AT1G14300	-	28.6	26.5	0.0298	0.102
1	4884950	4886793	AT1G14310	+	20.1	-15.1	0.0566	0.156
1	4888113	4889704	AT1G14320	+	9.2	-2.8	0.0959	0.216
1	4890068	4892332	AT1G14330	-	35.9	2	0.571	0.688
1	4897345	4899035	AT1G14340	+	10.6	5.5	0.306	0.457
1	4899044	4900054	AT1G14345	+	28.5	3.5	4.62e-06	0.000107
1	4911092	4913167	AT1G14360	-	16.4	-16.4	0.000231	0.00271
1	4915490	4918138	AT1G14370	+	8.9	-8.7	0.00541	0.0301
1	4918009	4921682	AT1G14380	-	20	3.3	0.0909	0.209
1	4926485	4928812	AT1G14400	-	12.4	-10	8.15e-12	1.16e-09
1	4928920	4931080	AT1G14410	-	4.7	1.6	0.559	0.679
1	4938753	4941332	AT1G14440	-	11.5	-4.9	0.569	0.686
1	4946191	4947670	AT1G14450	-	11.6	-10.7	0.00397	0.0238
1	4961593	4964515	AT1G14510	-	22.9	2.5	0.307	0.458
1	4980623	4983367	AT1G14560	+	8.7	0.6	0.0271	0.0955
1	4983488	4987375	AT1G14570	+	6.7	-5.5	0.123	0.251
1	4989561	4992805	AT1G14580	+	82.7	-52.8	0.191	0.334
1	5008152	5014533	AT1G14610	-	43.9	11.3	0.0267	0.0945
1	5014674	5016708	AT1G14620	-	9.4	-7.3	0.00124	0.00969
1	5027315	5031883	AT1G14650	+	57.5	46.3	0.149	0.284
1	5037575	5040597	AT1G14670	+	8.4	-1.4	0.0323	0.107
1	5042239	5045556	AT1G14685	+	31.9	18.4	0.0191	0.075
1	5051655	5055299	AT1G14690	-	27.4	27.3	0.037	0.117
1	5058582	5061140	AT1G14700	+	16.2	0.6	0.00942	0.0457
1	5061693	5065303	AT1G14710	-	44.8	-38.8	0.0222	0.0838
1	5066524	5068677	AT1G14720	-	45	35.5	0.763	0.829
1	5073030	5074798	AT1G14730	+	9.4	-7.9	0.223	0.369
1	5075178	5077981	AT1G14740	-	34.1	-23.9	0.639	0.742
1	5093960	5098270	AT1G14790	-	90.5	-76.1	0.384	0.532
1	5102423	5104850	AT1G14810	-	14.8	-11.8	2.16e-07	7.51e-06
1	5104974	5107107	AT1G14820	-	7.8	-2.5	0.791	0.849
1	5107415	5111746	AT1G14830	-	30.6	-27.8	0.0106	0.0498
1	5111700	5115514	AT1G14840	-	95.5	53.1	0.226	0.372
1	5116522	5123559	AT1G14850	-	23.6	-21.3	0.744	0.816
1	5128343	5129731	AT1G14870	-	8.8	-6.9	0.293	0.443
1	5136873	5137982	AT1G14890	+	10.5	-10	0.0214	0.0818
1	5138115	5139467	AT1G14900	-	6.3	-3.9	0.00336	0.0209
1	5139711	5143735	AT1G14910	-	24.8	-24.7	3.01e-05	0.000516
1	5148981	5151415	AT1G14920	+	10.5	-4.5	0.0745	0.185
1	5165488	5166939	AT1G14980	-	25.8	6.7	0.00924	0.0449
1	5166912	5168336	AT1G14990	-	7.3	1.9	0.829	0.873
1	5168595	5170066	AT1G15000	+	40.2	-39.2	0.0841	0.2
1	5172231	5176479	AT1G15020	-	61.8	59.1	0.00396	0.0237
1	5177479	5180049	AT1G15030	+	90.5	88.7	0.0456	0.135
1	5183257	5187106	AT1G15060	-	57.7	-56.1	0.173	0.313
1	5193283	5194214	AT1G15100	-	8.7	-7.7	0.163	0.301
1	5198939	5202315	AT1G15110	+	10.4	2.9	0.597	0.71
1	5202592	5204494	AT1G15120	+	16.5	-15.4	5.05e-15	1.76e-12
1	5206001	5209979	AT1G15130	-	33.9	-14.1	7.48e-08	2.98e-06
1	5210180	5212349	AT1G15140	-	8.4	-7.2	0.476	0.61
1	5220402	5222973	AT1G15170	+	9.5	6.1	0.745	0.817
1	5222728	5224143	AT1G15175	-	166.8	4.9	0.14	0.273
1	5224293	5226778	AT1G15180	+	9.1	-7.4	0.386	0.534
1	5228299	5231184	AT1G15200	-	179.3	146.7	0.784	0.844
1	5238043	5240051	AT1G15215	+	27.2	16.1	0.374	0.522
1	5240028	5241541	AT1G15220	-	17.8	-3.6	0.0299	0.102
1	5242072	5243262	AT1G15230	-	9.5	-5.8	0.878	0.905
1	5243382	5248693	AT1G15240	+	42.8	40.3	0.539	0.663
1	5248663	5249563	AT1G15250	-	4.4	-2.4	0.15	0.285
1	5249759	5250573	AT1G15260	+	6.1	-5.5	0.395	0.542
1	5250649	5252121	AT1G15270	-	9.3	-7.6	1.9e-05	0.000356
1	5252284	5256863	AT1G15280	+	25.4	-25.1	0.114	0.24
1	5256869	5265155	AT1G15290	-	63.6	-19	0.358	0.507
1	5275615	5277869	AT1G15340	-	23.4	-10.6	0.387	0.535
1	5278026	5279988	AT1G15350	-	22	22	0.0139	0.0603
1	5286865	5288640	AT1G15370	+	15	-14.2	2.66e-05	0.000469
1	5290581	5292582	AT1G15380	+	15.3	0.5	0.0829	0.198
1	5294628	5295931	AT1G15390	+	8.5	0	0.0232	0.0862
1	5295755	5297075	AT1G15400	-	45.9	-45.2	9.33e-05	0.00131
1	5297846	5298571	AT1G05163	-	17.8	15.5	0.594	0.707
1	5297874	5298166	AT1G15405	-	16.8	13.7	0.61	0.72
1	5298323	5300927	AT1G15410	+	101.1	-38.8	0.464	0.601
1	5301515	5303522	AT1G15420	-	18	-17.7	1.99e-08	9.72e-07
1	5304097	5306087	AT1G15430	+	8.1	-5.8	0.809	0.861
1	5306026	5309558	AT1G15440	-	10.2	-10	0.00169	0.0123
1	5317972	5320630	AT1G15480	+	33.5	30.7	0.396	0.543
1	5326289	5328875	AT1G15500	+	20.5	-16.4	0.425	0.569
1	5329063	5331711	AT1G15510	+	9.7	6.6	0.496	0.628
1	5361864	5365559	AT1G15570	+	17.7	-17.5	0.0791	0.192
1	5389951	5391672	AT1G15670	+	7.2	1.4	0.497	0.629
1	5398925	5402733	AT1G15690	+	17.6	-17.6	0.000176	0.00218
1	5404129	5405910	AT1G15710	+	13.3	-11.8	0.158	0.295
1	5407400	5410043	AT1G15730	-	43.2	-32.1	0.274	0.423
1	5410907	5414919	AT1G15740	+	21.8	-18.9	0.074	0.185
1	5414816	5421033	AT1G15750	-	8.3	-1.6	0.236	0.383
1	5430039	5436618	AT1G15780	-	71.7	-71.7	0.0542	0.151
1	5441071	5443911	AT1G15800	-	53.2	-2	0.205	0.349
1	5444219	5446564	AT1G15810	+	12.1	-0.9	0.815	0.865
1	5446461	5447880	AT1G15820	-	4.1	-2.2	0.018	0.0725
1	5454765	5457022	AT1G15860	+	8.2	4.1	0.188	0.331
1	5458397	5460359	AT1G15880	-	26.2	-22.6	8.78e-09	4.9e-07
1	5460476	5461297	AT1G15885	+	17.5	-17.3	0.00559	0.031
1	5465250	5469180	AT1G15910	+	63.2	56.3	0.116	0.243
1	5469254	5471149	AT1G15920	+	22.4	-21.8	0.0982	0.218
1	5471315	5473048	AT1G15930	+	15.7	-8.4	0.00946	0.0458
1	5473358	5478405	AT1G15940	+	65.1	37.3	0.748	0.819
1	5478702	5482180	AT1G15950	+	24.8	1.6	0.0445	0.133
1	5486272	5489132	AT1G15970	-	35.4	-35	8.25e-06	0.000175
1	5489144	5491363	AT1G15980	+	19.4	-4.5	0.0199	0.0775
1	5494532	5495359	AT1G16000	+	9.7	0.4	0.026	0.093
1	5495372	5497723	AT1G16010	-	18.3	-15.8	0.0177	0.0717
1	5498011	5501358	AT1G16020	+	10.3	-0.4	0.671	0.765
1	5501965	5504535	AT1G16030	-	3.6	2.6	0.111	0.236
1	5504607	5507059	AT1G16040	+	24.2	-23.4	0.0231	0.0861
1	5514261	5516027	AT1G16080	+	24.4	-16.4	0.0302	0.103
1	5538665	5540002	AT1G16170	-	14.5	2.7	0.457	0.596
1	5540049	5542902	AT1G16180	+	10.8	10.1	0.0294	0.101
1	5543118	5546103	AT1G16190	+	15.8	-15.1	0.0106	0.0499
1	5546098	5547753	AT1G16210	-	36.4	-29.3	0.134	0.266
1	5554842	5556844	AT1G16240	-	6.4	4.5	0.19	0.333
1	5556963	5559520	AT1G16250	+	14.3	1.5	0.918	0.933
1	5559497	5562192	AT1G16260	-	68.2	-19.1	0.335	0.486
1	5562860	5568368	AT1G16270	+	33.5	-32.4	0.303	0.453
1	5580820	5582154	AT1G16320	+	27.1	22.2	0.165	0.302
1	5587721	5590761	AT1G16340	-	9.5	-6.7	0.0979	0.218
1	5590755	5593098	AT1G16350	+	16.9	-15.1	0.081	0.195
1	5602785	5604770	AT1G16390	+	27.1	26.1	0.19	0.333
1	5608681	5612064	AT1G16410	+	12.1	7.6	0.273	0.423
1	5619544	5622674	AT1G16460	-	10.7	10.1	0.427	0.571
1	5622745	5625683	AT1G16470	+	6.9	1.3	0.36	0.509
1	5638778	5640202	AT1G16500	+	6.5	0.6	0.782	0.843
1	5648635	5651167	AT1G16520	+	23.5	-19.2	0.0164	0.0679
1	5668383	5670708	AT1G16560	+	14.9	-3.7	0.0319	0.106
1	5675494	5678873	AT1G16610	-	14.8	2.2	0.136	0.269
1	5697215	5699870	AT1G16670	+	34.8	-34.3	0.0274	0.0961
1	5702152	5705892	AT1G16680	+	61.3	-44.6	0.563	0.682
1	5709623	5712043	AT1G16700	+	13	5.3	0.0969	0.217
1	5713793	5722614	AT1G16710	+	229.5	203	0.0693	0.177
1	5722890	5726478	AT1G16720	+	15.7	-14.3	0.0154	0.0651
1	5726367	5727406	AT1G16730	-	20.8	-20.8	0.00509	0.0288
1	5727621	5729115	AT1G16740	+	3.1	0	0.277	0.427
1	5729056	5731934	AT1G16750	-	12.9	-10.9	0.146	0.281
1	5744334	5745259	AT1G16790	+	9.7	-9.7	0.00103	0.00852
1	5755587	5756895	AT1G16810	+	2.6	-0.3	0.465	0.602
1	5758381	5758575	AT1G05273	+	3.6	-2.9	0.843	0.882
1	5758854	5760509	AT1G16825	+	6.5	-2	0.353	0.503
1	5762693	5764184	AT1G16840	-	11.2	-0.5	0.0947	0.214
1	5767299	5770602	AT1G16860	+	26.5	-16.3	0.0497	0.143
1	5770731	5773322	AT1G16870	-	13.2	-4.2	0.509	0.64
1	5773511	5776308	AT1G16880	+	8	0.6	0.674	0.767
1	5776176	5778529	AT1G16890	-	5.9	1.7	0.249	0.399
1	5779007	5782433	AT1G16900	-	53	-50.6	0.078	0.191
1	5786556	5787329	AT1G16916	-	21.4	-21.4	3.83e-05	0.000634
1	5787149	5789312	AT1G16920	-	5.7	-0.3	0.69	0.778
1	5799740	5800887	AT1G16960	+	5.5	0.6	0.856	0.89
1	5820079	5822013	AT1G17020	+	26	-25.4	0.0325	0.107
1	5828914	5831383	AT1G17050	+	14.8	-11.4	0.0126	0.0563
1	5840268	5841745	AT1G17080	-	22.3	-18.9	0.162	0.299
1	5844645	5845661	AT1G17100	+	12	-7	0.027	0.0952
1	5845674	5850934	AT1G17110	-	85.7	85.4	0.0152	0.0642
1	5851859	5853987	AT1G17120	+	34.1	-32	0.00205	0.0144
1	5854092	5856697	AT1G17130	+	4.1	-3.7	0.272	0.421
1	5856572	5858550	AT1G17140	-	12.9	-0.4	0.897	0.919
1	5860077	5862890	AT1G17145	-	4.9	-2.4	0.717	0.797
1	5863108	5864059	AT1G17147	-	15.2	-14.9	0.414	0.559
1	5867534	5869436	AT1G17160	+	9.4	-0.2	0.696	0.782
1	5869542	5870883	AT1G17170	+	3.5	2.1	0.731	0.807
1	5875294	5876620	AT1G17190	+	99	-98.1	0.502	0.633
1	5878389	5880073	AT1G17200	+	5.7	-2.1	0.00871	0.043
1	5879995	5884773	AT1G17210	-	58	23.4	4.65e-05	0.000749
1	5885006	5890500	AT1G17220	+	15.5	-10.3	0.0134	0.0589
1	5909164	5911708	AT1G17270	-	48.4	-27.8	0.0999	0.221
1	5916831	5920342	AT1G17280	-	7.8	-7.4	0.000345	0.00367
1	5922331	5926400	AT1G17290	+	13.7	-4.6	0.0011	0.00897
1	5929825	5931926	AT1G17330	+	26.1	-19.1	0.396	0.543
1	5946447	5951561	AT1G17360	+	12.9	-11.3	0.0236	0.0874
1	5951541	5955143	AT1G17370	-	44.9	-43.7	0.331	0.482
1	5968409	5969995	AT1G17410	-	35.4	-2.5	0.00281	0.0182
1	5983983	5987934	AT1G17440	-	9	-1.2	0.664	0.761
1	5997056	5998599	AT1G17455	+	10.7	-9.8	0.0145	0.0622
1	6002887	6006410	AT1G17470	+	13	-2.1	0.191	0.334
1	6008436	6009420	AT1G17490	+	1.9	0.8	0.781	0.842
1	6023503	6024309	AT1G17510	-	6.3	-0.5	0.325	0.475
1	6027486	6029115	AT1G17530	+	8.9	-6.8	0.797	0.853
1	6034269	6037398	AT1G17550	+	11.4	-8.5	0.795	0.852
1	6039249	6049685	AT1G17580	+	39.7	-34.5	0.947	0.956
1	6061894	6063362	AT1G17620	+	7.5	-5.8	0.384	0.532
1	6069423	6072140	AT1G17650	-	16.2	-6.6	0.0861	0.202
1	6076070	6082395	AT1G17680	+	20.4	-10.4	0.0279	0.0975
1	6082721	6088381	AT1G17690	-	26.7	10.2	0.806	0.859
1	6089459	6090339	AT1G17700	+	7.9	-0.4	0.52	0.649
1	6093184	6098443	AT1G17720	-	148.8	148.8	0.0234	0.0869
1	6099038	6100397	AT1G17730	+	5.8	-5	0.0226	0.0848
1	6100963	6105347	AT1G17745	+	23.4	-0.6	0.018	0.0726
1	6110106	6116617	AT1G17760	-	223.3	150.3	0.0404	0.124
1	6123566	6125339	AT1G17780	+	103.3	97.1	0.881	0.907
1	6125277	6127567	AT1G17790	-	50.1	11.6	0.211	0.355
1	6142401	6146521	AT1G17840	+	13.4	-9.8	0.0716	0.181
1	6145925	6148940	AT1G17850	-	63.2	37	0.0842	0.2
1	6149300	6150038	AT1G17860	+	1.1	0.3	0.858	0.891
1	6149938	6152222	AT1G17870	-	40.3	-32.9	0.0861	0.202
1	6152383	6153982	AT1G17880	-	18.2	10.1	0.0322	0.107
1	6154263	6155804	AT1G17890	-	15	6.5	0.0742	0.185
1	6184716	6187499	AT1G17970	+	23.6	13.7	0.722	0.8
1	6187464	6191708	AT1G17980	-	31.3	-15.1	0.77	0.834
1	6192032	6194093	AT1G17990	-	15.9	-5.5	0.141	0.274
1	6194425	6196343	AT1G18000	-	37.5	-37.5	0.0836	0.199
1	6199689	6201759	AT1G18010	+	37.5	-37.5	0.0905	0.208
1	6202234	6204234	AT1G18020	+	16.9	-7.5	0.415	0.56
1	6204258	6206988	AT1G18030	+	8.8	-2.4	0.491	0.623
1	6211831	6213591	AT1G18060	-	4.3	2.9	0.0303	0.103
1	6213650	6218384	AT1G18070	-	25.7	3.6	0.0175	0.0712
1	6222200	6224242	AT1G18080	+	20.9	-2.6	0.0546	0.152
1	6244297	6247830	AT1G18150	-	17.9	-9	0.0152	0.0642
1	6248618	6254080	AT1G18160	+	60.5	-54.9	0.165	0.303
1	6254093	6255734	AT1G18170	+	39.8	-29.4	0.011	0.0512
1	6257850	6261501	AT1G18190	-	6.3	4.6	0.916	0.932
1	6266608	6268939	AT1G18210	-	15.2	-14.3	0.265	0.415
1	6276776	6278258	AT1G18250	-	7.7	-4.9	0.372	0.52
1	6278787	6282144	AT1G18260	-	19.4	13.9	0.368	0.516
1	6283369	6293993	AT1G18270	-	55.6	-48.2	0.877	0.905
1	6305813	6308243	AT1G18330	-	20.9	-20.7	0.0153	0.0646
1	6311442	6313931	AT1G18340	-	140.1	138.9	0.14	0.274
1	6316694	6319427	AT1G18360	-	43.9	43.1	0.189	0.331
1	6325535	6330179	AT1G18390	+	216.9	-209.2	0.127	0.257
1	6331397	6333856	AT1G18400	+	17.8	9	0.495	0.627
1	6345973	6347918	AT1G18440	+	8.5	3	0.507	0.637
1	6348047	6352010	AT1G18450	+	40.1	-40	0.0161	0.0672
1	6352324	6356113	AT1G18460	+	32.8	-11.9	1.19e-05	0.000242
1	6355694	6360344	AT1G18470	-	10.1	-4	0.51	0.64
1	6361585	6363061	AT1G18480	+	12.1	-12	0.303	0.453
1	6366519	6368879	AT1G18490	+	4.5	-0.9	0.137	0.269
1	6368965	6373080	AT1G18500	+	18.9	-16.4	0.151	0.287
1	6376638	6378580	AT1G18540	-	23.9	-20.9	0.0461	0.136
1	6389398	6391386	AT1G18570	+	21	0.5	0.129	0.26
1	6395768	6398274	AT1G18580	+	33.3	-33.3	0.268	0.417
1	6398530	6400029	AT1G18590	+	74.6	72.5	0.861	0.894
1	6400281	6402794	AT1G18600	+	19.3	-1.4	0.355	0.505
1	6405606	6409532	AT1G18610	+	305.8	266	0.0756	0.187
1	6409654	6414569	AT1G18620	+	30.8	2.9	0.0537	0.151
1	6414608	6416459	AT1G18630	+	16.4	-6.3	0.603	0.715
1	6416168	6418693	AT1G18640	-	12.5	2.1	0.0217	0.0824
1	6418837	6421188	AT1G18650	-	10.9	-10.5	0.0389	0.121
1	6420855	6425898	AT1G18660	+	22.1	-22.1	0.0067	0.0354
1	6426708	6431093	AT1G18670	-	38.7	8.3	0.399	0.545
1	6431937	6433552	AT1G18680	-	4.7	0.7	0.21	0.354
1	6433516	6437236	AT1G18690	+	231.5	225.5	0.42	0.564
1	6437473	6444076	AT1G18700	+	82.4	-6.8	0.193	0.336
1	6450584	6453263	AT1G18710	+	37.9	28	0.623	0.729
1	6457774	6460405	AT1G18720	-	16.2	-15.8	0.203	0.347
1	6460402	6462344	AT1G18730	+	31.4	30.4	2.29e-07	7.92e-06
1	6463921	6465476	AT1G18740	+	6.8	3.4	0.617	0.724
1	6465486	6466454	AT1G18745	-	22.6	-17.6	0.398	0.545
1	6466666	6469984	AT1G18750	+	4.6	-3.1	0.661	0.759
1	6474801	6475979	AT1G18773	+	12.2	7.7	0.201	0.344
1	6481112	6483646	AT1G18800	-	57.7	-25.3	0.0621	0.165
1	6485514	6487153	AT1G18810	-	7.8	-5.2	0.55	0.672
1	6500802	6504567	AT1G18840	-	43.7	-43.2	0.0624	0.166
1	6520720	6523368	AT1G18880	+	32.8	-31.4	0.000135	0.00176
1	6522763	6526075	AT1G18890	-	13.7	-10.5	0.826	0.871
1	6546176	6552108	AT1G18950	+	451.2	451.2	0.000378	0.00394
1	6557180	6558115	AT1G18980	-	13.4	12.5	0.113	0.238
1	6560490	6562791	AT1G19000	-	8.2	5.9	0.041	0.126
1	6568001	6568705	AT1G19020	+	7.1	-6.1	0.307	0.457
1	6577832	6579314	AT1G19050	-	12.7	-10.4	0.0891	0.206
1	6584240	6586517	AT1G19080	+	21.2	-1.5	0.376	0.524
1	6602104	6606028	AT1G19110	+	22.5	-21.3	0.0217	0.0825
1	6608114	6609369	AT1G19120	+	5.2	-3.1	0.628	0.734
1	6609324	6610613	AT1G19130	-	5.1	-4.9	0.288	0.437
1	6610651	6612609	AT1G19140	-	36.7	-22	0.00248	0.0166
1	6612629	6613972	AT1G19150	+	5.8	-2.3	0.0548	0.153
1	6616601	6619006	AT1G19170	+	29.2	24.9	0.000907	0.0077
1	6621776	6623668	AT1G19180	+	21.1	-16.4	0.0257	0.0923
1	6627682	6633133	AT1G19220	-	19.9	18.4	0.0436	0.131
1	6649242	6650446	AT1G19240	-	12.5	-11.5	0.0291	0.1
1	6662416	6666032	AT1G19270	+	11.1	9.2	0.032	0.107
1	6671094	6672777	AT1G19300	-	6.9	-5.6	0.824	0.87
1	6676209	6677680	AT1G19310	-	11.1	-10.4	0.106	0.23
1	6680422	6683559	AT1G19330	-	26.9	15.7	0.608	0.718
1	6688462	6691216	AT1G19350	+	34.3	15.2	0.00286	0.0184
1	6690398	6692566	AT1G19360	-	9.5	7.7	0.0867	0.203
1	6697873	6698858	AT1G19380	+	4.5	-3.5	0.102	0.224
1	6709777	6711788	AT1G19396	+	14.2	-9.4	0.985	0.986
1	6710850	6711787	AT1G19397	+	11.8	-11.5	0.757	0.825
1	6712021	6714483	AT1G19400	-	31.7	-31.7	0.264	0.414
1	6724412	6728075	AT1G19430	-	10.9	2.1	0.752	0.822
1	6728746	6730931	AT1G19440	+	23.3	22.5	0.187	0.329
1	6731410	6735024	AT1G19450	-	25.6	-25.5	0.0763	0.188
1	6746777	6751609	AT1G19485	+	7.9	4.4	0.85	0.886
1	6759858	6762847	AT1G19520	+	16.4	-12.8	0.106	0.23
1	6763764	6765049	AT1G19530	+	3.4	-1.4	0.831	0.874
1	6773301	6774523	AT1G19570	-	11.5	11.5	0.276	0.425
1	6774682	6777568	AT1G19580	+	4.7	-0.2	0.783	0.843
1	6778886	6781222	AT1G19600	+	6.4	-5.9	0.561	0.68
1	6796136	6799764	AT1G19650	-	46.4	-43	0.151	0.287
1	6799968	6802906	AT1G19660	-	6.5	-2.3	0.0725	0.182
1	6803485	6805092	AT1G19670	-	7.1	-7	0.0572	0.157
1	6805429	6807862	AT1G19680	+	159.9	-157.4	0.0953	0.215
1	6807714	6809642	AT1G19690	-	12.8	-10.6	0.157	0.294
1	6809584	6813063	AT1G19700	-	16.9	13.2	0.113	0.238
1	6816701	6819542	AT1G19715	-	9.5	-1.2	0.312	0.462
1	6819563	6822711	AT1G19720	-	420.4	-419.1	0.0124	0.0557
1	6822846	6824071	AT1G19730	-	19.1	17.2	0.00319	0.0201
1	6824321	6825459	AT1G19740	+	28.8	26.7	0.339	0.489
1	6832324	6833837	AT1G19770	+	5.8	-5.8	0.0758	0.187
1	6846337	6848128	AT1G19800	+	28.3	-22.3	1.21e-06	3.34e-05
1	6855898	6860563	AT1G19835	-	10.9	10	0.652	0.752
1	6886668	6891404	AT1G19850	+	192.7	-192.2	0.0842	0.2
1	6891381	6894752	AT1G19860	-	69.5	-5.2	0.354	0.503
1	6895008	6898818	AT1G19870	-	24.3	-21.5	1.51e-05	0.000294
1	6900336	6904155	AT1G19880	-	29.5	-6	0.464	0.601
1	6913000	6914634	AT1G19910	+	6.9	1	0.00275	0.018
1	6914517	6916823	AT1G19920	-	11.1	1.7	0.338	0.488
1	6927735	6928656	AT1G19960	+	8.6	8.4	0.0852	0.201
1	6931011	6932826	AT1G19970	-	18.2	-17.5	0.0124	0.0557
1	6935217	6936928	AT1G19990	+	29.3	29.1	0.325	0.476
1	6937718	6940832	AT1G20010	-	16.3	-13.3	0.0282	0.0979
1	6942624	6945091	AT1G20020	+	6.2	-5.8	0.00609	0.0331
1	6949042	6950509	AT1G20050	+	7.8	-4.7	0.0103	0.0487
1	6966841	6969009	AT1G20090	+	5.1	0.9	0.383	0.531
1	6969024	6971036	AT1G20100	-	56	-53.7	0.00665	0.0353
1	6971423	6975130	AT1G20110	+	17.4	13.6	0.195	0.337
1	6986311	6987863	AT1G20140	+	8.8	0.9	0.139	0.272
1	6998334	6999839	AT1G20190	-	17.4	-17.1	0.00229	0.0156
1	7001086	7004432	AT1G20200	-	8.6	-5.9	0.14	0.273
1	7004823	7007717	AT1G20220	-	45.9	7.6	0.553	0.674
1	7007755	7009380	AT1G20225	-	21.9	-20.9	4.21e-05	0.000689
1	7016598	7020690	AT1G20260	+	16.9	14	5.16e-05	0.000817
1	7020663	7023162	AT1G20270	-	14.2	0.4	0.433	0.575
1	7038526	7040231	AT1G20330	-	8.1	-4.9	0.16	0.297
1	7042045	7043392	AT1G20340	-	5.2	-2.3	0.00018	0.00221
1	7083011	7083910	AT1G20430	-	12.7	-8.6	0.000376	0.00392
1	7084408	7086873	AT1G20440	-	6	4	0.0905	0.208
1	7087902	7089606	AT1G20450	-	11.3	-10	0.673	0.766
1	7090940	7093442	AT1G20460	+	22.7	18.1	0.0102	0.0486
1	7094259	7094869	AT1G20470	+	10.5	0.3	0.514	0.643
1	7103361	7106121	AT1G20510	-	29	-20	0.0288	0.0994
1	7112610	7115362	AT1G20540	+	12	10.7	0.394	0.541
1	7119670	7121871	AT1G20560	-	26.8	-26.2	0.000744	0.00662
1	7126746	7128762	AT1G20575	-	4.8	-2.6	0.765	0.831
1	7128866	7130799	AT1G20580	+	21.7	-18.1	0.14	0.274
1	7142971	7146540	AT1G20620	+	5.7	-0.9	0.0848	0.2
1	7146635	7150180	AT1G20630	+	39.2	-35.9	0.0259	0.0928
1	7154409	7158287	AT1G20640	+	10.2	3.2	0.375	0.523
1	7157825	7160590	AT1G20650	-	13.5	-3.5	0.00398	0.0238
1	7164081	7168041	AT1G20670	-	79.9	-37.6	0.0879	0.205
1	7174335	7176647	AT1G20691	-	119	117.6	0.0835	0.199
1	7176746	7178895	AT1G20693	+	9.7	-9.7	0.00346	0.0214
1	7179272	7181574	AT1G20696	+	8.9	1.2	0.801	0.856
1	7209297	7214993	AT1G20760	+	13	8.4	0.878	0.905
1	7215009	7216897	AT1G20770	-	20.1	-15.6	0.175	0.315
1	7231980	7233657	AT1G20810	+	28.9	2.1	4.91e-05	0.000782
1	7233653	7235128	AT1G20816	+	3.3	-1.1	0.622	0.729
1	7242895	7244978	AT1G20830	+	11	-8.8	0.0363	0.115
1	7252110	7253747	AT1G20850	+	6.2	-2.8	0.655	0.755
1	7262008	7265555	AT1G20880	-	39.4	-15.5	0.683	0.773
1	7265793	7267377	AT1G20890	-	116.3	73	0.307	0.457
1	7276942	7281236	AT1G20910	-	36.2	-19.9	0.328	0.479
1	7285041	7289943	AT1G20920	+	113.8	100.3	0.0038	0.0229
1	7297238	7301633	AT1G20950	-	10.3	3.5	0.601	0.713
1	7301598	7310271	AT1G20960	-	87.2	49.1	0.37	0.518
1	7313900	7319921	AT1G20970	+	52.5	-34.6	5.9e-08	2.47e-06
1	7324470	7329441	AT1G20980	+	20.5	19.1	0.598	0.71
1	7337604	7339452	AT1G21000	+	12.2	-11.9	0.018	0.0725
1	7346155	7347283	AT1G21010	+	4	0	0.963	0.969
1	7366589	7368203	AT1G21050	+	2.7	-2.3	0.522	0.65
1	7371656	7374114	AT1G21060	+	84.3	80.6	0.251	0.4
1	7374114	7375789	AT1G21065	+	16.7	5.8	0.0104	0.049
1	7378537	7382661	AT1G21080	-	23.8	15	0.0841	0.2
1	7384559	7386580	AT1G21090	+	57.7	57.4	0.00484	0.0277
1	7386761	7388512	AT1G21100	-	5.1	5	0.254	0.404
1	7389980	7391603	AT1G21110	-	51.3	38.5	0.87	0.9
1	7398813	7400736	AT1G21130	-	7.4	3.2	0.776	0.839
1	7419663	7420957	AT1G21190	-	10.5	7.6	0.0263	0.0936
1	7442217	7442979	AT1G21260	-	26.6	-26.1	0.0384	0.12
1	7444748	7448483	AT1G21270	+	38.7	-24.1	0.0173	0.0706
1	7447489	7448483	AT1G21280	-	5.1	2.4	0.534	0.659
1	7453244	7455009	AT1G21310	-	4.9	-3.6	0.257	0.407
1	7476901	7479258	AT1G21350	-	8.5	0.5	0.0542	0.151
1	7483780	7485666	AT1G21370	+	21.2	5.5	0.639	0.742
1	7485635	7488780	AT1G21380	-	11.7	-7.9	0.0119	0.054
1	7493212	7496741	AT1G21400	+	11.3	-1.9	0.222	0.367
1	7496997	7499616	AT1G21410	+	42.9	-33.4	0.789	0.848
1	7502081	7504275	AT1G21440	-	11.6	-11.6	0.197	0.34
1	7508700	7511801	AT1G21450	+	102.7	52.5	2.92e-07	9.7e-06
1	7511749	7513481	AT1G21460	-	6.7	-3.4	0.358	0.507
1	7518945	7521552	AT1G21480	-	25.5	-23.1	0.000592	0.00559
1	7529704	7531108	AT1G21500	-	13.3	0.3	0.00084	0.00726
1	7554670	7557112	AT1G21560	+	18	-10.7	0.00126	0.00982
1	7557139	7565914	AT1G21580	-	210.4	-209.7	0.339	0.49
1	7566228	7570014	AT1G21590	-	16.8	-9.3	0.175	0.315
1	7570844	7573847	AT1G21600	-	15.4	-9.3	0.00998	0.0477
1	7573829	7578963	AT1G21610	+	68	-67.8	0.00451	0.0263
1	7581007	7588153	AT1G21630	+	66.4	-2.4	0.15	0.285
1	7588413	7592890	AT1G21640	+	20.7	16.3	0.416	0.561
1	7592663	7604229	AT1G21650	-	697.1	-696.9	0.284	0.434
1	7605619	7609223	AT1G21660	+	253.9	253.9	0.107	0.23
1	7610240	7612721	AT1G21670	+	35.1	23	0.8	0.855
1	7612833	7615374	AT1G21680	+	19.4	-14.6	0.228	0.375
1	7615504	7618628	AT1G21690	+	13.4	-2.5	0.0382	0.12
1	7620000	7624166	AT1G21700	-	32.3	-7.5	0.00303	0.0193
1	7624319	7626138	AT1G21710	+	13.8	7.4	0.503	0.634
1	7626181	7628290	AT1G21720	+	53	-19.7	0.375	0.523
1	7630106	7636658	AT1G21730	+	71.4	47.4	0.526	0.653
1	7645609	7648855	AT1G21750	+	5.6	0.6	0.332	0.482
1	7649193	7651816	AT1G21760	+	21.2	-19.4	0.0314	0.105
1	7651645	7652288	AT1G21770	-	7.7	3.1	0.028	0.0977
1	7651881	7654014	AT1G21780	+	21.7	-4.7	0.168	0.306
1	7654087	7655981	AT1G21790	+	9.4	-8.9	0.243	0.392
1	7660946	7662725	AT1G21830	-	30.1	-25.9	0.0755	0.187
1	7666413	7667794	AT1G21840	+	24.4	-20.3	0.0712	0.18
1	7680389	7682641	AT1G21880	+	42.2	-12.9	0.354	0.504
1	7690801	7692459	AT1G21900	-	20.7	-1.9	0.00423	0.025
1	7696426	7697831	AT1G21910	+	16.1	13.2	0.253	0.403
1	7704172	7706254	AT1G21920	-	5.6	2.7	0.191	0.333
1	7712818	7714459	AT1G21930	+	2.6	-1.1	0.678	0.77
1	7734660	7738772	AT1G21980	+	22	-18.4	0.0185	0.0736
1	7754280	7758029	AT1G22020	+	115.2	111.7	0.000591	0.00559
1	7767923	7770216	AT1G22040	+	45.9	-17.9	0.0119	0.0541
1	7771658	7773154	AT1G22050	+	4.4	-0.9	0.529	0.656
1	7773062	7781539	AT1G22060	-	90.5	-90.5	0.0478	0.14
1	7789132	7792139	AT1G22070	+	11.5	-11.5	0.000483	0.00471
1	7814662	7815722	AT1G22140	-	47.1	-43.5	0.389	0.536
1	7823065	7823971	AT1G22160	+	20.6	-12.5	2.29e-05	0.000414
1	7828325	7830424	AT1G22180	-	58.5	-57.9	0.213	0.357
1	7835780	7837411	AT1G22190	+	20	-20	0.036	0.115
1	7837562	7840898	AT1G22200	-	4.7	-1.9	0.718	0.798
1	7865434	7866176	AT1G22270	+	4	2.6	0.209	0.353
1	7873866	7876018	AT1G22280	+	24.5	13.8	0.0686	0.176
1	7878758	7881395	AT1G22300	-	25.9	2.3	6.11e-06	0.000135
1	7886322	7889534	AT1G22330	+	47.6	31.7	0.679	0.77
1	7894806	7897761	AT1G22360	-	70.7	-15.8	0.539	0.664
1	7903659	7906969	AT1G22400	-	53.8	-45.4	0.842	0.881
1	7911842	7915004	AT1G22410	+	21.5	-16	0.0387	0.121
1	7919076	7921893	AT1G22430	+	18.2	-9.4	0.693	0.78
1	7925120	7927345	AT1G22450	+	43.3	-41	0.134	0.266
1	7949475	7950900	AT1G22500	+	10.2	-9.6	0.123	0.252
1	7950817	7952832	AT1G22510	-	251.7	150.6	0.0298	0.102
1	7952973	7954546	AT1G22520	-	90.7	86.6	0.00877	0.0432
1	7955444	7958564	AT1G22530	-	9.1	-7.8	0.000388	0.004
1	7963812	7966436	AT1G22540	+	17.2	3.4	0.317	0.467
1	7966499	7968692	AT1G22550	-	49.2	41.5	0.094	0.213
1	7981721	7984334	AT1G22590	+	17.3	-13.3	0.815	0.865
1	7994165	8002989	AT1G22620	-	19.9	14.7	0.736	0.81
1	7994261	7997588	AT1G22610	+	9.5	-1.6	0.0923	0.211
1	8003222	8004304	AT1G22630	+	2.4	-0.1	0.205	0.349
1	8006063	8007465	AT1G22640	+	12.9	-5.8	0.000637	0.00592
1	8013352	8016150	AT1G22650	-	41.6	-35.5	0.0223	0.0841
1	8027125	8028168	AT1G22690	+	10.8	-10.3	0.853	0.888
1	8028157	8030136	AT1G22700	-	7.1	-3.7	0.0555	0.154
1	8030586	8033156	AT1G22710	-	5.2	3.8	0.641	0.743
1	8046072	8049039	AT1G22730	+	14.8	-8.9	0.73	0.805
1	8049089	8050784	AT1G22740	+	57.9	19.3	0.0923	0.211
1	8050769	8052930	AT1G22750	+	38.1	-19	0.612	0.722
1	8061750	8067790	AT1G22770	+	10.3	6.9	0.427	0.571
1	8067863	8069356	AT1G22780	+	19.5	-14	0.101	0.222
1	8069376	8071593	AT1G22790	+	15	-4.4	0.143	0.276
1	8071788	8074357	AT1G22800	+	8.7	-4.7	0.109	0.234
1	8071788	8075020	AT1G05767	+	8.7	-4.7	0.0914	0.21
1	8079286	8080574	AT1G22840	+	3.4	3	0.106	0.229
1	8080481	8082882	AT1G22850	-	11.7	5	0.0252	0.091
1	8083183	8089273	AT1G22860	+	14.4	-13.6	0.0299	0.102
1	8089266	8094505	AT1G22870	+	23.2	9.7	0.854	0.889
1	8101423	8102500	AT1G22885	+	5.7	2.8	0.656	0.755
1	8102727	8103588	AT1G22890	+	2.1	-0.7	0.395	0.542
1	8104992	8108361	AT1G22910	+	23.2	-22.5	0.527	0.654
1	8109573	8112061	AT1G22920	-	14.2	3.9	0.489	0.622
1	8117285	8122151	AT1G22930	+	26.3	-24.6	0.637	0.74
1	8122338	8125068	AT1G22940	+	24.2	-24.2	0.000894	0.00762
1	8125022	8127286	AT1G22950	-	21.6	-20.2	0.477	0.612
1	8130597	8132435	AT1G22970	-	4.7	2	0.995	0.996
1	8143226	8145174	AT1G23000	+	11.7	-10.5	0.537	0.662
1	8149867	8153796	AT1G23020	-	40.9	23.2	0.182	0.324
1	8156503	8159185	AT1G23030	+	9.7	-0.9	0.755	0.824
1	8164781	8166716	AT1G23040	+	28.8	26	0.000382	0.00395
1	8168442	8169267	AT1G23050	+	6.1	5.8	0.476	0.611
1	8168442	8169267	AT1G23052	-	11.4	-6.1	0.239	0.386
1	8180188	8183650	AT1G23080	-	28.6	-27.2	0.00279	0.0181
1	8184924	8189234	AT1G23090	-	87.2	-87.2	0.226	0.372
1	8195775	8196475	AT1G23100	+	3	2.1	0.426	0.57
1	8198585	8199616	AT1G23120	+	12.7	-12.7	0.0115	0.0526
1	8200320	8201246	AT1G23130	+	6.1	-6.1	1.06e-13	2.52e-11
1	8215720	8219641	AT1G23180	+	129.7	-129.7	0.108	0.231
1	8219807	8224547	AT1G23190	+	11.4	-1.2	0.674	0.767
1	8233952	8235019	AT1G23205	-	9.1	4.4	0.777	0.84
1	8242368	8244403	AT1G23220	+	11.5	2.5	0.529	0.656
1	8244417	8251937	AT1G23230	+	18.2	-11.3	0.0114	0.0524
1	8256853	8258725	AT1G23260	-	5.2	4.4	0.325	0.475
1	8260607	8262795	AT1G23280	-	27.8	-26.5	0.384	0.532
1	8262924	8263739	AT1G23290	+	4.1	1.6	7.18e-07	2.11e-05
1	8268384	8272021	AT1G23310	-	13	12.2	1.22e-07	4.57e-06
1	8279553	8282421	AT1G23330	-	19.9	-10.1	0.0472	0.138
1	8295077	8296941	AT1G23360	-	28.7	19.1	0.568	0.685
1	8308964	8310916	AT1G23390	-	20.1	-20	0.00015	0.00192
1	8311983	8315876	AT1G23400	-	27.2	-27	0.000713	0.00645
1	8321610	8324497	AT1G23440	+	18.7	-14	0.553	0.674
1	8326746	8329782	AT1G23460	+	15.7	-10	0.0783	0.191
1	8332861	8336414	AT1G23480	+	25.2	-15.6	0.592	0.706
1	8336592	8338827	AT1G23490	+	4.2	-1.7	0.101	0.222
1	8385187	8386522	AT1G23710	+	153.2	-150.6	0.24	0.388
1	8398114	8399836	AT1G23740	-	12	-10.8	0.123	0.252
1	8406662	8408530	AT1G23780	-	20.1	7.5	0.149	0.283
1	8420264	8422985	AT1G23820	+	17.4	-17.3	0.000369	0.00387
1	8427256	8429498	AT1G23860	-	46.6	-37.6	0.00113	0.00909
1	8432178	8435656	AT1G23870	+	83.4	-33.3	0.0632	0.167
1	8435656	8438811	AT1G23880	+	742.6	-739.7	0.0245	0.0893
1	8438765	8440866	AT1G23890	-	51.4	-33.3	0.157	0.293
1	8441072	8447681	AT1G23900	+	56.3	-53.9	0.0237	0.0876
1	8469532	8471417	AT1G23950	-	7.6	-6.6	0.472	0.607
1	8478390	8480356	AT1G23960	-	10.3	5.1	0.00829	0.0416
1	8481996	8483875	AT1G23970	-	175.1	102.8	0.386	0.534
1	8500118	8502065	AT1G24020	-	70.6	-65.3	0.879	0.906
1	8503776	8506813	AT1G24040	-	142	-139.7	0.984	0.985
1	8506967	8508909	AT1G24050	+	17.2	-13.2	0.00014	0.00181
1	8525333	8527087	AT1G24100	-	29	-27.5	0.195	0.338
1	8529063	8532262	AT1G24120	-	22.2	-20.9	0.07	0.178
1	8540837	8542053	AT1G24145	+	8.4	-5.3	0.138	0.271
1	8542211	8543545	AT1G24147	+	18.6	15.1	0.713	0.795
1	8544247	8545590	AT1G24148	+	22.2	-21.4	0.00496	0.0283
1	8553312	8556750	AT1G24160	-	7.5	-6.8	0.175	0.316
1	8557214	8559066	AT1G24170	-	15.9	-10.3	0.00377	0.0228
1	8560419	8563502	AT1G24180	-	29	-3.6	0.000251	0.00289
1	8563509	8570580	AT1G24190	-	14.3	8.7	0.041	0.126
1	8586334	8588180	AT1G24240	+	20.4	15.5	0.317	0.467
1	8604021	8607484	AT1G24267	-	17.3	-3.4	0.249	0.399
1	8612504	8614277	AT1G24290	-	14.7	14.2	0.0104	0.0492
1	8614362	8620664	AT1G24300	-	68.6	22.1	0.831	0.875
1	8624013	8626405	AT1G24310	+	72.5	44.1	0.0684	0.176
1	8635186	8638986	AT1G24340	+	208.5	190.2	0.192	0.334
1	8638519	8640825	AT1G24350	-	20.3	-18.5	0.0227	0.0849
1	8640581	8643503	AT1G24360	+	55.5	-43.9	0.0784	0.191
1	8661837	8664007	AT1G24440	+	10.2	10.2	0.00823	0.0414
1	8664096	8665569	AT1G24450	+	9.1	-0.6	0.346	0.496
1	8665873	8672651	AT1G24460	+	28.1	22.5	0.2	0.343
1	8682194	8685271	AT1G24490	+	14.5	-14.5	0.000123	0.00163
1	8685270	8688247	AT1G24510	-	18.2	-11.4	0.859	0.893
1	8693226	8694705	AT1G24530	+	12.1	4.6	0.158	0.295
1	8702360	8705879	AT1G24560	+	11.1	6.2	0.903	0.923
1	8710846	8711578	AT1G24575	-	5.2	0.9	0.113	0.238
1	8712477	8713225	AT1G24577	-	3.5	-0.8	0.864	0.896
1	8720650	8722825	AT1G24610	-	72.1	51.9	0.00944	0.0457
1	8725788	8727212	AT1G24625	-	5.4	4.2	0.644	0.746
1	8741835	8755604	AT1G24706	+	587.4	534.7	0.0578	0.158
1	8759532	8763469	AT1G24764	-	105.1	-99.8	0.0889	0.206
1	8767561	8769571	AT1G24793	+	23.3	-15.8	0.146	0.28
1	8769510	8771553	AT1G24800	+	18.2	13	6.91e-08	2.79e-06
1	8771369	8773535	AT1G24807	-	106.9	-80.7	0.0926	0.211
1	8775900	8778072	AT1G24880	+	107.6	103.1	1.32e-14	4.26e-12
1	8784035	8785634	AT1G24881	+	27	3.5	5.73e-07	1.74e-05
1	8785784	8787914	AT1G24909	-	106.9	-80.7	0.0876	0.204
1	8804488	8806361	AT1G25054	+	27.8	-8.6	0.00674	0.0355
1	8806606	8808156	AT1G25055	+	18.2	13	3.69e-07	1.17e-05
1	8812694	8815264	AT1G25098	+	109.7	108.1	5.26e-16	2e-13
1	8818866	8820736	AT1G25145	+	27.8	-8.6	0.00626	0.0338
1	8821007	8822843	AT1G25150	+	34.5	29.5	1.78e-07	6.32e-06
1	8822691	8824821	AT1G25155	-	107.5	-82.3	0.0737	0.184
1	8826982	8829682	AT1G25175	+	107.5	102.8	1.54e-16	6.05e-14
1	8833244	8835235	AT1G25210	+	23	-15.8	0.146	0.28
1	8835385	8837007	AT1G25211	+	18.4	13.2	1.37e-07	5.06e-06
1	8836834	8839609	AT1G25220	-	67.8	-3.2	0.351	0.501
1	8840202	8842445	AT1G25230	-	6	-2	0.815	0.865
1	8853533	8855874	AT1G25260	-	17.2	-12.9	1.59e-05	0.000306
1	8860526	8861522	AT1G25275	+	6.5	-5.6	0.285	0.435
1	8863767	8866894	AT1G25280	+	30.6	-30.6	0.000347	0.00369
1	8867023	8869289	AT1G25290	+	13.3	-11	0.703	0.787
1	8889017	8894306	AT1G25350	-	31.8	0.4	0.293	0.443
1	8903404	8906455	AT1G25380	+	15.9	-11.9	0.227	0.373
1	8906028	8909334	AT1G25390	-	99.9	-98.2	0.142	0.276
1	8915914	8918267	AT1G25420	+	35.2	-30.9	5.36e-05	0.000844
1	8922415	8923879	AT1G25425	+	24	-18.2	0.338	0.489
1	8933715	8935544	AT1G25440	-	6.8	-3	0.601	0.713
1	8938386	8940613	AT1G25450	-	92.4	84.2	0.927	0.941
1	8944608	8946322	AT1G25470	-	29.5	-14.2	0.0645	0.169
1	8951161	8955160	AT1G25490	+	12.4	-3.8	0.42	0.564
1	8962086	8964564	AT1G25520	+	10.7	7	0.0238	0.0878
1	8964543	8967562	AT1G25530	-	119.8	100.9	0.399	0.545
1	8969064	8974815	AT1G25540	-	36.4	-35.6	0.835	0.878
1	8976325	8978305	AT1G25550	+	3.9	-3.2	0.433	0.575
1	8981555	8983314	AT1G25560	-	10.7	-10.4	0.0114	0.0524
1	8991707	8995617	AT1G25570	-	7.3	3.6	0.667	0.763
1	8996713	8999917	AT1G25580	-	8.9	0.6	0.877	0.905
1	9002284	9004762	AT1G25682	-	7	-3	0.136	0.268
1	9020379	9022769	AT1G26090	+	45.2	-32.1	0.107	0.23
1	9024340	9027955	AT1G26110	-	26.1	-25.4	0.506	0.637
1	9028375	9032327	AT1G26120	-	34.3	11.6	0.0542	0.151
1	9039627	9043855	AT1G26150	-	33.5	-11.6	0.00446	0.0261
1	9044421	9047049	AT1G26160	-	42.3	-26.3	0.84	0.88
1	9047291	9054703	AT1G26170	-	79.4	-75.6	0.216	0.361
1	9054672	9056941	AT1G26180	+	11.4	4.2	0.0468	0.138
1	9065954	9071468	AT1G26208	-	111	50.7	0.656	0.755
1	9067038	9068207	AT1G26210	+	3.7	3	0.499	0.631
1	9071057	9072273	AT1G26218	-	205.5	170.6	0.41	0.555
1	9071139	9071861	AT1G26220	+	8.5	-7.6	0.154	0.29
1	9072255	9075350	AT1G26230	-	28.9	-6	0.323	0.473
1	9089468	9092560	AT1G26270	-	9.6	-0.1	0.175	0.316
1	9095767	9099766	AT1G26300	-	20.6	-9.6	0.746	0.817
1	9113863	9114977	AT1G26340	+	6.3	-6.2	0.35	0.5
1	9121442	9125578	AT1G26370	-	10.8	-10.3	0.267	0.417
1	9143936	9146106	AT1G26440	-	26.5	-24.9	0.262	0.412
1	9148635	9150250	AT1G26450	-	11.2	10.8	0.849	0.886
1	9151627	9154762	AT1G26460	+	11.7	-1.4	0.333	0.483
1	9155090	9156370	AT1G26470	+	10	-7.6	0.000395	0.00405
1	9171117	9173033	AT1G26550	+	36.3	-35.3	0.00106	0.00869
1	9178211	9181967	AT1G26560	+	17.2	3.5	0.44	0.582
1	9184566	9187578	AT1G26580	+	41.5	12.6	0.538	0.663
1	9195511	9199671	AT1G26620	-	6.7	6.7	0.438	0.58
1	9205799	9207417	AT1G26630	+	4.3	2	0.548	0.67
1	9207382	9209902	AT1G26640	-	15.3	-14.4	0.122	0.251
1	9210050	9211588	AT1G26650	+	2.4	-1.9	0.895	0.917
1	9211598	9214004	AT1G26660	+	239.5	216.8	0.0197	0.0768
1	9214071	9215557	AT1G26665	+	4.1	2.2	0.64	0.743
1	9215769	9218010	AT1G26670	+	11.1	10.4	0.0235	0.0872
1	9224058	9225792	AT1G26690	-	2.3	1.3	0.841	0.881
1	9244980	9246652	AT1G26740	-	12.5	-10.1	0.0184	0.0733
1	9246856	9248274	AT1G26750	+	21.4	-11.4	0.000715	0.00646
1	9250040	9251659	AT1G26761	-	32.1	25.6	0.246	0.395
1	9259431	9261313	AT1G26770	+	7.9	-2.4	0.29	0.439
1	9285024	9286395	AT1G26800	-	14.1	-2.5	0.713	0.795
1	9295564	9298629	AT1G26830	+	6.9	0.8	0.149	0.284
1	9300805	9304328	AT1G26850	-	11.1	-10.8	0.162	0.299
1	9315304	9318277	AT1G26880	-	36.5	-22.6	0.000178	0.0022
1	9316014	9316161	AT1G06033	-	1.5	0	0.923	0.938
1	9321649	9323028	AT1G26910	+	11.4	-9.6	0.133	0.265
1	9329492	9330612	AT1G26920	+	35.2	-30.9	0.00783	0.0399
1	9336056	9337938	AT1G26930	-	35.6	-16.2	0.371	0.519
1	9343111	9345323	AT1G26940	+	5.3	4	0.166	0.303
1	9351159	9352833	AT1G26945	+	20.1	19.1	0.0444	0.133
1	9373884	9376828	AT1G27000	+	32	23.3	0.0038	0.0229
1	9381526	9384060	AT1G27030	+	30.1	-15.2	0.254	0.404
1	9393652	9394716	AT1G27050	+	125	-121.1	0.855	0.889
1	9396657	9399500	AT1G27070	-	33.1	28.4	0.755	0.824
1	9403752	9406369	AT1G27090	-	15	1.6	0.596	0.709
1	9407084	9411368	AT1G27100	-	39.3	-39.3	0.0351	0.113
1	9421008	9424084	AT1G27120	+	29.6	-22.3	0.0576	0.158
1	9425279	9426897	AT1G27130	+	9.9	-9.9	0.000413	0.0042
1	9429007	9432310	AT1G27150	+	14.9	3	0.403	0.549
1	9446596	9449046	AT1G27190	-	8.6	8.2	0.575	0.691
1	9449337	9451768	AT1G27200	-	30.8	-17	0.174	0.315
1	9455276	9458176	AT1G27210	-	20.3	-13.7	0.00182	0.013
1	9481404	9482992	AT1G27290	+	4.8	1.6	0.243	0.391
1	9483156	9484368	AT1G27300	+	8	-6.1	0.054	0.151
1	9484315	9486002	AT1G27310	-	69.8	-69.7	0.00667	0.0354
1	9486888	9492632	AT1G27320	+	35.6	-29.5	0.000439	0.00437
1	9492848	9494382	AT1G27330	+	5.2	-4.1	0.287	0.437
1	9495343	9498085	AT1G27340	+	9.5	-8.4	0.281	0.431
1	9497999	9499639	AT1G27350	-	8.1	-2.7	0.00356	0.0218
1	9505111	9508542	AT1G27370	-	21.2	8	0.237	0.385
1	9510474	9512971	AT1G27385	-	36.9	-36.9	1.02e-05	0.000211
1	9513080	9515050	AT1G27390	-	14.1	12.5	0.552	0.674
1	9515113	9517070	AT1G27400	+	22.5	-22	0.0253	0.0913
1	9520824	9527280	AT1G27430	-	35.3	-32.8	0.587	0.702
1	9527500	9528878	AT1G27435	-	16	0.2	0.0197	0.0769
1	9528966	9531489	AT1G27440	-	16.4	7.8	0.0282	0.0979
1	9531808	9534141	AT1G27450	+	10	7.4	0.00503	0.0286
1	9534487	9537614	AT1G27460	+	13.5	-5.9	0.00805	0.0407
1	9544409	9546285	AT1G27480	+	11.4	-10.9	0.386	0.534
1	9554709	9558461	AT1G27510	-	60.2	-9.3	0.00295	0.0188
1	9558561	9562485	AT1G27520	+	57.1	56.6	0.29	0.44
1	9562486	9564031	AT1G27530	-	24.6	5.5	0.724	0.802
1	9565912	9567906	AT1G27540	-	59.6	44	0.352	0.501
1	9574549	9575189	AT1G27565	+	13.8	-13.3	2.57e-06	6.42e-05
1	9592087	9602917	AT1G27595	+	1884.9	1881.5	0.000252	0.0029
1	9603550	9606247	AT1G27600	-	12.9	4.2	0.69	0.778
1	9611052	9614336	AT1G27630	+	44.1	-38.9	0.331	0.482
1	9614550	9616357	AT1G27650	+	17.8	-11.9	0.587	0.701
1	9636587	9638901	AT1G27690	+	56.9	-56.7	0.111	0.236
1	9639023	9640204	AT1G27695	+	6	5.9	0.0104	0.049
1	9648020	9649323	AT1G27730	-	4.9	-2	0.79	0.848
1	9657172	9661994	AT1G27750	+	91.1	74.1	0.422	0.566
1	9662020	9667550	AT1G27752	+	55.8	2.9	0.94	0.95
1	9668507	9671657	AT1G27760	+	21.6	-15	6.65e-05	0.00101
1	9671631	9676307	AT1G27770	-	94.7	-87.8	0.422	0.566
1	9693007	9696546	AT1G27840	-	30.1	-28.3	0.535	0.66
1	9698297	9703944	AT1G27850	+	28.6	12.3	0.556	0.676
1	9715341	9720629	AT1G27900	-	45.4	32.3	0.481	0.615
1	9720732	9724800	AT1G27910	-	81.1	-80.8	0.404	0.55
1	9726606	9730424	AT1G27921	-	58.1	22.6	0.0489	0.142
1	9730958	9733000	AT1G27930	-	17.8	-10	0.49	0.622
1	9740507	9742159	AT1G27950	+	2.6	-1.2	0.433	0.575
1	9746708	9748467	AT1G27970	+	6.4	-4.2	0.01	0.0478
1	9748505	9752769	AT1G27980	+	6.8	-1.7	0.806	0.859
1	9778850	9782907	AT1G28060	+	223	214.8	0.00419	0.0249
1	9782846	9784091	AT1G28070	+	25.7	8.4	0.293	0.442
1	9795717	9799116	AT1G28090	+	67.3	-60.8	0.192	0.334
1	9801081	9804394	AT1G28100	+	114.6	97.3	0.00431	0.0254
1	9803640	9806899	AT1G28110	-	39.3	0.1	0.207	0.351
1	9812929	9815560	AT1G28120	-	6.3	-0.9	0.294	0.443
1	9825168	9828118	AT1G28130	+	14.5	-13.9	0.368	0.516
1	9831875	9834510	AT1G28140	-	142.1	124	0.00148	0.0111
1	9834641	9836210	AT1G28150	-	8.5	-4.2	8.34e-05	0.0012
1	9846746	9848015	AT1G28190	-	48.8	-47.7	0.233	0.38
1	9849843	9852449	AT1G28200	-	14.1	6.6	0.198	0.34
1	9862040	9864779	AT1G28230	-	17.7	1.4	0.596	0.709
1	9868256	9872278	AT1G28240	-	42.4	31.2	0.349	0.499
1	9874246	9875579	AT1G28250	+	17.4	-17.4	0.000253	0.00291
1	9875526	9879433	AT1G28260	-	20.5	-13.6	0.0106	0.0499
1	9885399	9887478	AT1G28280	-	26.3	19.9	0.0159	0.0666
1	9889100	9891015	AT1G28290	-	3.3	0.7	0.621	0.727
1	9912202	9913837	AT1G28310	-	35.2	-19.7	0.498	0.63
1	9920218	9924488	AT1G28320	-	16.6	-11.1	0.739	0.812
1	9933785	9935440	AT1G28330	-	2.8	-0.2	0.319	0.469
1	9939960	9943616	AT1G28340	+	23.1	-22.2	0.0149	0.0633
1	9943736	9949835	AT1G28350	+	298.4	-292.7	0.681	0.772
1	9963447	9966320	AT1G28380	+	19.5	-17.4	0.000476	0.00465
1	9969245	9971681	AT1G28395	-	21.5	18	0.596	0.709
1	9972184	9973942	AT1G28400	-	13	-12.7	0.0368	0.117
1	9976181	9979793	AT1G28410	-	39.5	39.4	0.00507	0.0287
1	9996712	10000455	AT1G28440	+	17.7	-15.1	0.000823	0.00715
1	10015855	10018047	AT1G28490	+	38.2	19.4	0.168	0.306
1	10023816	10026311	AT1G28510	+	46.7	-44.2	0.000261	0.00297
1	10029082	10031990	AT1G28520	+	23.8	2.8	0.203	0.347
1	10035616	10037403	AT1G28540	+	5.1	-1.4	0.0954	0.215
1	10044336	10046552	AT1G28580	-	9.6	5.8	0.236	0.383
1	10050956	10053218	AT1G28600	-	22.8	-22.8	0.132	0.264
1	10053442	10055881	AT1G28610	-	53.6	-10.9	0.0471	0.138
1	10071608	10073549	AT1G28660	-	152.4	-142.3	0.0836	0.199
1	10074358	10076457	AT1G28670	-	18.8	-17	0.00444	0.026
1	10078188	10079909	AT1G28680	+	7.7	4.1	0.43	0.573
1	10109499	10111738	AT1G28960	-	79.7	73	0.21	0.355
1	10133982	10136124	AT1G29040	+	13.8	0	0.706	0.789
1	10136245	10139228	AT1G29050	-	28.8	0.2	0.0745	0.185
1	10147604	10149780	AT1G29060	+	129.4	127.6	0.0237	0.0875
1	10149790	10151407	AT1G29070	+	36.3	-36.2	0.000715	0.00646
1	10174161	10178521	AT1G29120	+	11.7	-5.1	0.113	0.239
1	10180301	10182808	AT1G29150	+	31.7	-4.4	0.0376	0.119
1	10190136	10195213	AT1G29170	-	30.6	-1.4	0.0352	0.114
1	10223265	10224799	AT1G29250	-	13.3	-9.4	2.06e-05	0.000382
1	10224814	10226322	AT1G29260	+	18.3	-14.4	0.0186	0.0737
1	10236336	10237990	AT1G29280	+	298	-265.3	0.101	0.223
1	10252240	10254792	AT1G29310	+	93.2	85.6	0.0953	0.215
1	10258247	10261232	AT1G29330	-	10.3	4.5	0.674	0.767
1	10264042	10266917	AT1G29340	+	27	-10	0.169	0.308
1	10268420	10273821	AT1G29350	-	6.8	5.2	0.368	0.516
1	10273930	10275765	AT1G29357	-	15.5	5	0.462	0.6
1	10277747	10283225	AT1G29370	-	25.8	23	0.574	0.691
1	10286066	10288103	AT1G29390	-	68.4	66.1	0.117	0.244
1	10288128	10289666	AT1G29395	-	8.3	-5.5	0.509	0.639
1	10289997	10294630	AT1G29400	-	6.8	0.5	0.92	0.936
1	10300350	10300453	AT1G06233	+	14.3	-11.3	0.0609	0.163
1	10300488	10300565	AT1G06237	+	8.8	8.8	0.41	0.555
1	10300877	10301302	AT1G29418	+	1.5	0.1	0.739	0.812
1	10300881	10301021	AT1G06253	+	2.1	0.4	0.665	0.761
1	10301376	10302099	AT1G29420	-	4.8	3.2	0.72	0.799
1	10302584	10303418	AT1G29430	-	8.6	8	0.535	0.66
1	10304506	10305108	AT1G29440	-	36.5	-33.2	0.143	0.276
1	10305552	10306595	AT1G29450	-	35.3	30.3	0.495	0.627
1	10307351	10308246	AT1G29460	-	12	-6.4	0.331	0.482
1	10308519	10309896	AT1G29465	+	31.2	-30.6	0.00629	0.0339
1	10309264	10309404	AT1G06283	+	23	-22.9	0.0131	0.0577
1	10310130	10314147	AT1G29470	-	31.3	-31	0.215	0.36
1	10321010	10321978	AT1G29500	+	2.9	2.2	0.188	0.33
1	10322422	10323239	AT1G29510	+	3.6	2	0.32	0.47
1	10323635	10324826	AT1G29520	+	3.9	-2.8	0.299	0.449
1	10324744	10326848	AT1G29530	-	39.4	8.6	0.273	0.422
1	10371674	10374005	AT1G29660	+	11.9	6.6	0.249	0.398
1	10375598	10377871	AT1G29670	+	17	-16.8	0.648	0.748
1	10379019	10382153	AT1G29690	-	10.4	-8.3	0.43	0.573
1	10384944	10387441	AT1G29700	-	53.1	-36.4	0.208	0.352
1	10387513	10389286	AT1G29710	+	42.9	-42.9	0.112	0.237
1	10422291	10424513	AT1G29760	+	24.7	1.4	0.255	0.405
1	10426778	10429143	AT1G29785	-	17.2	15.3	0.915	0.931
1	10429717	10432123	AT1G29790	+	22.6	-8.3	0.366	0.515
1	10432598	10435441	AT1G29800	+	36.8	18.1	0.0611	0.164
1	10435373	10437558	AT1G29810	-	50.6	35.4	0.0823	0.197
1	10447346	10449969	AT1G29850	+	34.6	27.4	0.00331	0.0207
1	10459456	10462967	AT1G29880	-	26	4.4	0.0478	0.14
1	10463028	10467452	AT1G29890	+	111.4	7.4	0.574	0.691
1	10467955	10472211	AT1G29900	+	27.9	-15.8	0.682	0.772
1	10472279	10473502	AT1G29910	-	5.7	2.4	0.000254	0.00291
1	10474655	10475969	AT1G29920	-	3	2.3	0.361	0.51
1	10477884	10479114	AT1G29930	+	2.1	1.7	0.0114	0.0525
1	10479006	10486824	AT1G29940	-	61	-50.6	0.656	0.755
1	10491697	10494598	AT1G29950	+	26.6	-13.1	0.115	0.241
1	10498309	10499462	AT1G29965	-	11.2	0.6	0.109	0.233
1	10498350	10501498	AT1G29970	-	224.3	-219.5	0.000231	0.00271
1	10503238	10506189	AT1G29980	-	8.5	-2.6	0.0781	0.191
1	10507532	10509151	AT1G29990	+	75.1	72.4	0.104	0.226
1	10509155	10512558	AT1G30000	-	22.1	-12.9	0.0244	0.089
1	10546510	10548236	AT1G30070	-	22.4	-21.3	1.18e-05	0.00024
1	10559495	10561545	AT1G30090	-	15.2	14.8	0.297	0.447
1	10584104	10586680	AT1G30120	-	15.3	-12	0.784	0.843
1	10587470	10590209	AT1G30130	+	75.9	61.1	0.0321	0.107
1	10624999	10627135	AT1G30200	+	13.7	-11.9	0.103	0.225
1	10627184	10630630	AT1G30210	-	17.4	6.6	0.712	0.794
1	10638877	10640941	AT1G30230	+	7.4	5.6	0.194	0.336
1	10650913	10651829	AT1G30260	+	8.7	-6.5	0.39	0.537
1	10654799	10658924	AT1G30270	+	46.4	-46.4	0.0208	0.08
1	10672972	10675455	AT1G30300	+	31.7	-27.4	0.00225	0.0154
1	10685821	10690988	AT1G30330	-	131.7	-130.3	0.269	0.418
1	10715481	10718997	AT1G30360	+	16.5	-12.8	0.565	0.684
1	10722182	10723247	AT1G30380	+	5.2	-2	0.000142	0.00183
1	10727316	10738092	AT1G30400	+	135.9	-111.6	0.0264	0.0939
1	10738682	10747563	AT1G30410	+	194.5	-83.2	0.163	0.301
1	10758742	10762429	AT1G30440	+	61.4	-60.8	0.0202	0.0782
1	10762707	10769616	AT1G30450	+	72	34.5	0.077	0.189
1	10770812	10775428	AT1G30460	-	497.3	480.9	0.0381	0.12
1	10779110	10786697	AT1G30470	+	64.1	52.9	0.423	0.567
1	10788225	10790241	AT1G30475	-	41.5	-41.5	0.00153	0.0114
1	10790021	10792725	AT1G30480	+	34.9	28.3	0.786	0.845
1	10796123	10801093	AT1G30490	-	27.2	-11.3	0.821	0.868
1	10804449	10806428	AT1G30500	-	39	-38.6	0.00192	0.0137
1	10806929	10809188	AT1G30510	-	27.2	-26.7	0.00117	0.00933
1	10810396	10813779	AT1G30520	+	13.3	-6.7	0.145	0.28
1	10814611	10816615	AT1G30530	+	19.3	-5.1	0.607	0.718
1	10816615	10819419	AT1G30540	-	17.5	-10.8	0.0541	0.151
1	10828372	10831656	AT1G30570	+	14	-0.4	0.273	0.423
1	10831672	10835635	AT1G30580	-	11.4	-3.7	0.111	0.236
1	10835734	10840872	AT1G30590	-	23	18.7	0.884	0.91
1	10846512	10850724	AT1G30610	+	25.5	-23.1	0.661	0.759
1	10858231	10860322	AT1G30630	-	26.3	-24.9	0.103	0.225
1	10860618	10865074	AT1G30640	+	13.9	1.9	0.225	0.37
1	10881478	10886472	AT1G30680	+	12.1	11.3	0.268	0.417
1	10887606	10890407	AT1G30690	+	61.4	-47.3	0.763	0.83
1	10944907	10949482	AT1G30820	-	10.9	-1.3	0.555	0.675
1	10960907	10963231	AT1G30825	+	21.1	1.6	0.126	0.256
1	10966906	10968878	AT1G30835	+	72.6	72.4	0.173	0.313
1	10979645	10980725	AT1G30845	+	28.2	-13.3	0.0256	0.0922
1	10993001	10994152	AT1G30880	-	21.1	8.2	0.00504	0.0286
1	10994242	10996223	AT1G30890	+	11.8	-10.2	0.0527	0.149
1	11000861	11003226	AT1G30910	+	26.5	-1.2	0.00636	0.0342
1	11040249	11043773	AT1G30970	-	15.4	9.3	0.00406	0.0242
1	11057104	11059037	AT1G31020	+	12.9	12.4	0.0088	0.0433
1	11084665	11088589	AT1G31070	+	4.9	-4.5	0.281	0.431
1	11104236	11108095	AT1G31120	-	40.5	17.4	0.645	0.746
1	11114692	11116195	AT1G31130	-	60.3	38.8	0.132	0.263
1	11122603	11124220	AT1G31160	-	93.9	77.5	0.0359	0.115
1	11133409	11135189	AT1G31170	+	19.6	2.8	0.012	0.0544
1	11140470	11142716	AT1G31175	+	25.8	16.3	0.93	0.944
1	11142460	11144717	AT1G31180	-	83.9	71.6	0.0811	0.195
1	11144771	11146930	AT1G31190	+	31.5	3.2	0.0116	0.0531
1	11156697	11158683	AT1G31220	+	57	32.6	0.139	0.272
1	11158617	11163274	AT1G31230	-	38	-36.5	0.102	0.223
1	11171224	11171835	AT1G31258	+	13.2	-11.3	0.00311	0.0197
1	11193624	11196397	AT1G31300	+	64	49.8	0.000986	0.00822
1	11214675	11216141	AT1G31330	-	5	-3.5	2.6e-05	0.000461
1	11216809	11217546	AT1G31335	-	8.1	-6.9	0.74	0.812
1	11217694	11219618	AT1G31340	-	30.2	-6.9	0.191	0.334
1	11246816	11249587	AT1G31410	-	29.8	-20.9	0.169	0.307
1	11249599	11253915	AT1G31420	+	18.5	-13.6	0.0159	0.0666
1	11255835	11258814	AT1G31440	-	10.6	7.5	0.753	0.822
1	11261442	11263364	AT1G31460	-	106.3	-103.2	0.393	0.54
1	11273572	11276636	AT1G31500	-	25.2	3.5	0.129	0.26
1	11288377	11293799	AT1G31540	-	211	145.2	0.359	0.508
1	11295445	11297379	AT1G31550	-	20.4	14.2	0.0188	0.0743
1	11310996	11311989	AT1G31580	+	12.5	-12.3	0.00201	0.0141
1	11312960	11316582	AT1G31600	-	84.9	62.1	0.409	0.555
1	11326250	11330791	AT1G31650	-	93.5	2.7	0.0349	0.113
1	11330923	11333540	AT1G31660	-	11	-10.8	0.538	0.663
1	11349696	11355587	AT1G31710	+	30.8	14	0.795	0.852
1	11359511	11364288	AT1G31730	+	29.5	-21.9	0.138	0.271
1	11372393	11374301	AT1G31760	-	12.6	-3.1	0.181	0.323
1	11374759	11377885	AT1G31770	-	10.2	-9.6	0.348	0.498
1	11391198	11394748	AT1G31780	+	21.3	5.9	0.0887	0.206
1	11396401	11399714	AT1G31800	+	32	-6.3	0.578	0.694
1	11399606	11406809	AT1G31810	-	29.9	-22.9	0.761	0.828
1	11410765	11412233	AT1G31812	-	14.9	-14.2	7.67e-30	1.38e-26
1	11414694	11416444	AT1G31817	-	7.1	-3.6	0.374	0.523
1	11416450	11418464	AT1G31820	-	98.3	-98.1	0.000832	0.0072
1	11418588	11420961	AT1G31830	-	41.7	-41.6	0.119	0.247
1	11422635	11423684	AT1G31835	-	41	-37.7	0.0403	0.124
1	11430099	11434115	AT1G31850	+	7.7	-0.1	0.623	0.73
1	11434059	11436607	AT1G31860	-	623.1	-619.6	2.33e-07	8e-06
1	11456801	11463896	AT1G31910	+	14.8	8.3	0.736	0.81
1	11461854	11463857	AT1G31920	-	26.9	-26.9	0.0659	0.172
1	11464933	11469207	AT1G31930	+	5.5	1.3	0.57	0.688
1	11469481	11470010	AT1G31935	+	9.1	-1.3	0.11	0.234
1	11470055	11471481	AT1G31940	-	14.5	3.9	0.0144	0.0617
1	11479762	11482890	AT1G31970	+	12	1	0.0937	0.213
1	11528384	11531350	AT1G32050	+	16.4	-3	0.000732	0.00655
1	11532198	11534639	AT1G32060	+	6.4	-6.3	0.0544	0.152
1	11534606	11536437	AT1G32070	-	9.4	-5.5	0.0149	0.0636
1	11537241	11539896	AT1G32080	-	15.6	-8.6	1.65e-07	5.96e-06
1	11539992	11544166	AT1G32090	-	17.1	9.3	0.347	0.497
1	11546159	11548016	AT1G32100	-	8.4	-7.6	0.253	0.402
1	11558754	11561920	AT1G32130	-	10.7	3.9	0.643	0.746
1	11565493	11568645	AT1G32150	+	8.6	-7.1	0.401	0.548
1	11568653	11570438	AT1G32160	+	23.5	-22.7	7.92e-14	1.99e-11
1	11575319	11578030	AT1G32170	+	154.7	-154.7	0.0983	0.219
1	11592926	11596056	AT1G32190	-	85.4	-8.3	0.302	0.451
1	11601670	11605174	AT1G32200	-	97.4	97.1	1.89e-11	2.45e-09
1	11605605	11607866	AT1G32210	-	18.8	-14.4	4.55e-07	1.42e-05
1	11607853	11609968	AT1G32220	+	17.2	-13.7	0.14	0.274
1	11611890	11617419	AT1G32230	+	67.5	-44.1	0.000455	0.00449
1	11640557	11641889	AT1G32260	-	151	149.2	0.127	0.257
1	11653499	11654833	AT1G32310	+	9.3	2.3	0.305	0.455
1	11656963	11660471	AT1G32330	-	95.1	-94.9	0.268	0.417
1	11663007	11666120	AT1G32340	-	26.5	-26	0.281	0.431
1	11672765	11675387	AT1G32360	+	55.5	-52.1	0.258	0.408
1	11676924	11678692	AT1G32370	+	65.2	-29.2	0.0635	0.168
1	11681733	11684520	AT1G32380	+	38.9	38.9	0.103	0.226
1	11689063	11691588	AT1G32400	-	21.9	20.9	0.0657	0.171
1	11693798	11695575	AT1G32410	+	3.1	1	0.452	0.592
1	11711943	11715162	AT1G32440	+	12.9	6.2	0.385	0.533
1	11715146	11719988	AT1G32450	-	34.6	-34.1	0.289	0.439
1	11738117	11739326	AT1G32460	+	2.3	0.1	0.563	0.682
1	11739303	11740399	AT1G32470	-	12.1	3.8	0.123	0.251
1	11742005	11749788	AT1G32490	-	113	-106.5	0.212	0.357
1	11749797	11752190	AT1G32500	-	26	-13.3	0.0129	0.0573
1	11758210	11759324	AT1G32520	-	16.3	-15.7	0.000633	0.0059
1	11759426	11762635	AT1G32530	-	112.4	111.6	0.0975	0.218
1	11767484	11770049	AT1G32540	+	58.1	53.8	0.00208	0.0145
1	11771620	11774294	AT1G32550	-	35.4	-25.5	1.91e-07	6.78e-06
1	11774483	11775442	AT1G32560	+	25.5	-25.5	0.0259	0.0928
1	11783542	11785704	AT1G32580	+	43	20.9	0.00196	0.0139
1	11798118	11801407	AT1G32640	-	9.8	3.7	0.154	0.29
1	11820871	11821824	AT1G32690	-	5.7	0.1	0.925	0.939
1	11827358	11829933	AT1G32700	+	15.2	-11	0.00374	0.0227
1	11846246	11856765	AT1G32750	-	72.7	-68.2	0.84	0.88
1	11874507	11877549	AT1G32790	-	14.7	-7.4	0.0932	0.212
1	11881310	11886015	AT1G32810	+	41.9	-35	0.226	0.372
1	11920389	11923866	AT1G32900	-	38.7	-21.3	0.41	0.555
1	11928756	11929993	AT1G32920	+	7	-3.4	0.734	0.809
1	11931148	11931801	AT1G32928	+	8.5	7.4	0.318	0.468
1	11937182	11941116	AT1G32940	+	278.4	269.4	0.111	0.236
1	11955655	11957402	AT1G32990	+	12.9	-10.9	0.00177	0.0128
1	11966422	11967843	AT1G33040	+	11.6	-11.3	1.31e-06	3.55e-05
1	11967782	11971532	AT1G33050	-	48.1	27.5	0.00315	0.0199
1	11971307	11972580	AT1G33055	-	109.2	-108.8	0.0709	0.179
1	11975306	11978622	AT1G33060	-	18.8	-18.5	0.139	0.272
1	11985649	11990520	AT1G33080	+	199.1	-181.8	0.719	0.799
1	12002237	12003005	AT1G33102	-	16.2	-13.9	0.000464	0.00456
1	12004853	12008852	AT1G33110	+	25.4	-22.1	0.0994	0.22
1	12010878	12012547	AT1G33120	+	24.6	19.5	0.0936	0.213
1	12023224	12024783	AT1G33140	+	8.9	-6.1	5.62e-07	1.71e-05
1	12026935	12030539	AT1G33170	+	29.1	23.5	0.605	0.716
1	12046378	12050095	AT1G33230	+	12.7	-11.8	0.271	0.42
1	12051360	12054753	AT1G33240	-	27.5	-14.8	0.592	0.706
1	12057197	12059792	AT1G33250	-	29.2	17.9	0.0621	0.165
1	12066594	12068101	AT1G33265	+	22.6	-21.6	0.00172	0.0125
1	12068062	12070455	AT1G33270	-	16.4	-4.2	0.343	0.493
1	12074098	12076289	AT1G33290	+	14.7	-2.8	0.0187	0.0741
1	12109560	12118861	AT1G33410	-	27.6	26.8	0.864	0.896
1	12118989	12126651	AT1G33415	+	1538.8	844.1	0.0106	0.0497
1	12144439	12147208	AT1G33470	+	9.9	-9.7	0.514	0.644
1	12150673	12152460	AT1G33490	-	7.2	4.6	0.214	0.359
1	12157053	12159125	AT1G33520	-	32.5	2	0.45	0.59
1	12168767	12172119	AT1G33560	+	34	16.5	0.493	0.625
1	12177672	12179628	AT1G33590	+	7.7	-7.5	0.0303	0.103
1	12180482	12184528	AT1G33600	+	7.7	-5.4	0.546	0.668
1	12188677	12190461	AT1G33610	+	19.7	-15.3	0.0522	0.148
1	12203944	12208698	AT1G33680	+	66.7	-61	0.429	0.572
1	12244559	12246231	AT1G33780	-	3.4	-1.5	0.418	0.562
1	12256473	12260638	AT1G33790	+	21.7	-19.5	0.826	0.871
1	12264941	12266920	AT1G33810	+	6.2	-3.8	0.311	0.461
1	12267807	12269913	AT1G33811	+	11.9	-11.9	0.429	0.572
1	12349303	12351318	AT1G33970	-	29.2	15.2	0.0636	0.168
1	12351565	12355173	AT1G33980	+	9.3	-5.2	0.186	0.329
1	12355556	12358031	AT1G33990	+	10.4	-5.5	0.0135	0.059
1	12357909	12358966	AT1G34000	-	15.4	-4.4	5.45e-07	1.67e-05
1	12359453	12361313	AT1G34010	-	28.9	-27.7	0.025	0.0905
1	12366809	12370014	AT1G34020	+	37	-36.2	0.354	0.503
1	12370064	12371554	AT1G34030	-	13.6	-11.5	0.322	0.473
1	12417011	12421792	AT1G34110	-	86.1	73.1	0.0644	0.169
1	12429845	12433236	AT1G34130	+	81.2	-51.4	0.593	0.707
1	12435881	12439499	AT1G34150	+	26.3	-1.7	0.869	0.899
1	12451404	12454542	AT1G34190	+	16.9	-0.5	0.0843	0.2
1	12455652	12457547	AT1G34200	+	46.6	46.6	0.0685	0.176
1	12458563	12462905	AT1G34210	+	5.9	-3	0.405	0.551
1	12462848	12466089	AT1G34220	-	9.6	-9.6	0.0109	0.0507
1	12485317	12492207	AT1G34260	+	88.7	13.2	0.617	0.725
1	12503359	12506172	AT1G34300	+	11.3	-7.8	0.222	0.367
1	12520058	12524377	AT1G34320	+	8.4	-7.4	0.353	0.503
1	12530814	12534306	AT1G34340	+	77.2	-76.5	0.0765	0.188
1	12534425	12536162	AT1G34350	+	36.4	-36	2.42e-06	6.17e-05
1	12542795	12546244	AT1G34360	+	49.9	-49.8	0.014	0.0603
1	12550338	12552629	AT1G34370	+	4.9	-4.4	0.144	0.278
1	12582121	12582721	AT1G34418	+	2.1	2.1	0.222	0.368
1	12587725	12590223	AT1G34430	-	46.6	-37.1	0.272	0.421
1	12604160	12607033	AT1G34470	+	13.4	-0.9	0.00623	0.0337
1	12646673	12652646	AT1G34550	-	46.7	-46.6	0.0166	0.0685
1	12654926	12656605	AT1G34570	-	69.4	-66.2	0.00715	0.0373
1	12685175	12687641	AT1G34630	+	53.4	-50.6	0.423	0.567
1	12687551	12688543	AT1G34640	-	14	2.2	0.637	0.741
1	12735999	12738196	AT1G34750	-	11.2	1.1	0.263	0.413
1	12743721	12745748	AT1G34760	-	25	-18.5	0.162	0.3
1	12746404	12748617	AT1G34770	+	17.7	-17.7	0.00276	0.018
1	12748570	12750506	AT1G34780	-	9.1	5.4	0.0891	0.206
1	12751155	12752905	AT1G34844	+	40	-39.9	0.115	0.242
1	12842157	12845455	AT1G35115	+	26.2	-20.8	0.186	0.328
1	12867080	12868890	AT1G35160	+	15.5	-10.9	0.0012	0.00948
1	12877106	12878835	AT1G35180	-	36.3	-36.3	0.00479	0.0275
1	12890403	12892955	AT1G35190	+	4.7	-1.2	0.839	0.879
1	12908847	12914858	AT1G35220	+	79.3	-70.5	0.217	0.362
1	12977667	12979947	AT1G35340	+	27.5	-27.5	1.09e-06	3.04e-05
1	12980688	12984740	AT1G35350	-	51.8	-5.4	0.0133	0.0584
1	13026205	13027691	AT1G35420	+	51.4	22.6	0.000381	0.00395
1	13030552	13031375	AT1G35430	-	3.2	-0.5	0.88	0.907
1	13039659	13042159	AT1G35460	+	20.6	8.3	0.261	0.411
1	13051156	13055093	AT1G35470	-	14.2	2.6	0.0133	0.0584
1	13071164	13074984	AT1G35510	+	31.7	-12.1	0.806	0.859
1	13077889	13080265	AT1G35515	+	16.1	-15.2	0.395	0.542
1	13078415	13079773	AT1G35516	+	14	-13.4	0.273	0.422
1	13115825	13117235	AT1G35560	-	13.4	-7	0.879	0.906
1	13122081	13125328	AT1G35580	-	26.2	4.9	0.0639	0.168
1	13145642	13146693	AT1G35612	+	10.6	-1.8	0.0424	0.129
1	13156345	13158467	AT1G35620	+	13.1	-12.2	0.00119	0.00948
1	13205344	13208289	AT1G35670	+	13.2	-13.1	0.0914	0.21
1	13208682	13210428	AT1G35680	+	11.4	-11.3	0.0421	0.128
1	13225167	13227239	AT1G35720	+	3.4	-0.6	0.165	0.302
1	13277258	13280387	AT1G35780	-	25.2	0.4	0.293	0.443
1	13450088	13453683	AT1G36050	+	25.2	8.2	0.528	0.655
1	13466693	13470936	AT1G36070	-	170.9	170.8	0.114	0.241
1	13533167	13544015	AT1G36160	+	79.9	50.1	0.205	0.349
1	13640507	13643126	AT1G36280	+	19.1	15.8	0.118	0.246
1	13669424	13671203	AT1G36310	+	11.5	2.8	0.281	0.431
1	13671773	13674205	AT1G36320	+	11.6	-6.3	8.06e-06	0.000172
1	13696041	13698739	AT1G36370	-	43.6	-43.6	0.0725	0.182
1	13700764	13701632	AT1G36380	+	20.3	-19.5	1.3e-06	3.53e-05
1	13701400	13703573	AT1G36390	-	17.3	-3.7	0.56	0.679
1	13898209	13900831	AT1G36730	-	12.1	-12	0.0188	0.0744
1	14003818	14005502	AT1G36940	+	3	-1.2	0.953	0.96
1	14024633	14027040	AT1G36980	+	9.1	-4.3	0.00253	0.0168
1	14027221	14030500	AT1G36990	-	20.2	-8	0.168	0.307
1	14158451	14161938	AT1G37130	+	11.1	-8.8	6.23e-09	3.66e-07
1	15603567	15607966	AT1G41830	-	18.3	16.4	0.467	0.604
1	15650634	15652542	AT1G41880	-	6.9	3.1	0.0452	0.135
1	15891280	15894576	AT1G42430	+	82.6	59.4	0.39	0.537
1	15895196	15900105	AT1G42440	-	21.8	-16	0.00183	0.0131
1	15926675	15935529	AT1G42470	+	152.2	148.9	0.074	0.185
1	15973053	15976813	AT1G42540	+	31	24.4	0.103	0.226
1	15976804	15979952	AT1G42550	+	52.3	12.2	0.378	0.526
1	16125742	16127298	AT1G42960	+	5.4	-2.5	1.21e-05	0.000245
1	16127352	16129895	AT1G42970	+	12.9	-12.7	3.54e-17	1.53e-14
1	16135722	16137463	AT1G42990	-	48.8	-48.1	0.00537	0.0299
1	16228188	16231254	AT1G43130	-	13.7	10.7	0.1	0.222
1	16266552	16268945	AT1G43170	+	15.2	-11	4.78e-09	3e-07
1	16275107	16278742	AT1G43190	-	15.3	-4.6	0.462	0.6
1	16308509	16311094	AT1G43245	-	46.8	38.6	0.559	0.679
1	16397978	16399880	AT1G43560	-	5.4	5.4	0.072	0.181
1	16410371	16412736	AT1G43580	-	8.6	-8.5	0.461	0.599
1	16425411	16430287	AT1G43620	-	45.5	15.4	0.864	0.896
1	16467297	16470500	AT1G43670	+	52.6	42.1	1.01e-05	0.000209
1	16478158	16482859	AT1G43690	+	71.2	52.3	0.0886	0.206
1	16484230	16486327	AT1G43700	+	13.2	-13	0.157	0.294
1	16486229	16488462	AT1G43710	-	8.9	1.9	0.0817	0.196
1	16575758	16576541	AT1G43790	+	3.1	-2.4	0.619	0.727
1	16616987	16622049	AT1G43850	+	19.6	13.2	0.212	0.356
1	16620768	16624504	AT1G43860	-	100.3	-98.1	0.795	0.852
1	16638996	16645265	AT1G43886	-	549.7	548.4	0.197	0.34
1	16646695	16648639	AT1G43890	+	8.8	-7.9	0.00698	0.0366
1	16654029	16655928	AT1G43900	+	16	-14.8	0.157	0.294
1	16708003	16709713	AT1G44000	-	40.7	11.2	0.00283	0.0183
1	16764391	16767685	AT1G44100	-	34.6	-34.6	0.0471	0.138
1	16796399	16800321	AT1G44170	-	6	-3.3	0.18	0.321
1	16834209	16838562	AT1G44350	-	33.2	19.8	0.176	0.317
1	16848307	16851271	AT1G44446	-	12.3	-9.1	0.119	0.247
1	16870220	16873427	AT1G44575	+	6.9	-0.9	0.0459	0.136
1	16892526	16896089	AT1G44750	+	39.8	32.9	0.106	0.229
1	16896678	16898645	AT1G44760	-	15.7	10.8	0.0879	0.205
1	16907536	16909572	AT1G44770	-	16.3	-16.1	0.000362	0.00382
1	16912153	16913664	AT1G44790	-	108.2	-107.4	0.0154	0.0649
1	16913993	16917053	AT1G44800	-	18.1	-15.1	0.51	0.64
1	16923439	16924821	AT1G44810	+	17.2	-15.6	0.155	0.292
1	16926296	16929196	AT1G44820	+	17	-1.9	0.249	0.399
1	16939691	16942558	AT1G44835	+	3.3	0.2	0.88	0.907
1	16982903	16984444	AT1G44920	-	42.7	30.5	0.0697	0.178
1	16999445	17001734	AT1G44960	+	22.3	15.5	0.483	0.617
1	17009050	17011929	AT1G45000	+	6.2	-1.2	0.271	0.42
1	17031210	17033269	AT1G45050	+	25.3	13.7	0.0204	0.0788
1	17065110	17069269	AT1G45130	+	29.5	-25.8	0.0376	0.119
1	17074941	17076417	AT1G45145	-	25.6	-25.6	0.00749	0.0386
1	17077385	17082592	AT1G45150	-	19.5	-1.7	0.0159	0.0666
1	17083076	17090588	AT1G45160	-	62.4	45.4	0.613	0.722
1	17090676	17091464	AT1G45163	-	8.7	-8.5	0.24	0.388
1	17095979	17098041	AT1G45170	-	9.8	0.3	0.115	0.241
1	17115761	17119246	AT1G45191	+	186.5	181.7	0.0685	0.176
1	17123784	17129223	AT1G45201	+	66.4	8.6	0.33	0.48
1	17169435	17171472	AT1G45230	-	70.2	26.1	1.43e-05	0.000283
1	17172120	17177060	AT1G45332	-	23.4	-3.7	0.0192	0.0754
1	17179249	17180806	AT1G45474	+	20.8	15.1	0.0198	0.0771
1	17191361	17193314	AT1G45688	+	14.6	-11.6	0.0196	0.0766
1	17199313	17200841	AT1G45976	+	16.6	-16.5	0.0069	0.0363
1	17252951	17253903	AT1G46554	+	11.2	6.1	0.561	0.68
1	17265585	17266824	AT1G46768	-	9.4	-3.2	0.678	0.77
1	17275889	17277839	AT1G47056	-	19.6	1.2	0.0867	0.203
1	17282748	17285749	AT1G47128	-	11.2	1.9	0.279	0.429
1	17297830	17298829	AT1G47200	-	32.9	-12.5	0.207	0.351
1	17300690	17302914	AT1G47210	+	10.8	-1.2	0.43	0.573
1	17319118	17321202	AT1G47250	+	16.4	-1	0.0144	0.0618
1	17319550	17323484	AT1G47260	-	7.5	-6.2	0.0164	0.0678
1	17326529	17328772	AT1G47270	+	6.3	1	0.638	0.741
1	17330818	17332336	AT1G47278	+	30.7	-27.1	0.834	0.876
1	17335750	17339275	AT1G47290	+	5.6	-0.5	0.745	0.817
1	17342738	17344828	AT1G47310	+	6.9	-6.7	0.0185	0.0735
1	17351017	17353875	AT1G47330	+	8.6	-8.5	0.0255	0.0917
1	17372370	17376091	AT1G47380	-	17.7	-12.9	0.122	0.251
1	17382997	17383830	AT1G47395	+	18.1	17.4	0.163	0.3
1	17395517	17397263	AT1G47420	-	30.9	-26.4	0.413	0.558
1	17424472	17427475	AT1G47490	+	51.4	26.4	0.0281	0.0979
1	17432432	17435124	AT1G47500	+	21.9	-16.9	0.0604	0.163
1	17443287	17446628	AT1G47520	+	14.7	-4.2	0.00193	0.0137
1	17451552	17454461	AT1G47530	+	12	0.9	0.276	0.425
1	17456986	17465195	AT1G47550	+	52.5	-5.3	0.754	0.823
1	17477578	17483502	AT1G47570	+	705.8	-686.9	0.00777	0.0396
1	17485575	17486463	AT1G47580	+	5.4	-5.2	0.0981	0.218
1	17518046	17520129	AT1G47640	-	43.1	-36.5	0.00352	0.0217
1	17536624	17539719	AT1G47670	-	5.1	-0.2	0.738	0.811
1	17557090	17560331	AT1G47710	+	16.2	-15.6	0.0036	0.022
1	17561285	17562934	AT1G47720	-	31.9	31.3	0.0701	0.178
1	17566510	17569297	AT1G47740	+	20.4	-13.3	5.64e-06	0.000126
1	17569255	17570159	AT1G47750	-	4.8	3.2	0.0349	0.113
1	17611904	17612613	AT1G47820	+	65	-59.2	0.216	0.361
1	17613028	17614986	AT1G47830	-	21.8	-21.1	0.000302	0.00332
1	17647143	17651791	AT1G47900	-	312.5	276	0.137	0.27
1	17681156	17683719	AT1G47960	-	112.9	-112.8	0.0932	0.212
1	17686989	17688859	AT1G47970	+	35.9	-27.7	0.348	0.498
1	17716892	17719500	AT1G48030	-	4.4	0.8	0.262	0.412
1	17723381	17727243	AT1G48050	+	360.6	348.6	0.00528	0.0296
1	17732009	17758508	AT1G48090	-	238.4	-63.7	0.502	0.633
1	17769937	17773518	AT1G48110	-	25.8	25.1	0.00177	0.0128
1	17781987	17784211	AT1G48140	+	41	16.7	0.0178	0.0718
1	17786497	17789024	AT1G48160	-	32.1	7.7	0.0288	0.0994
1	17788762	17790246	AT1G48170	+	227.8	222.2	0.0201	0.078
1	17790363	17792340	AT1G48175	+	18.5	-5.7	0.00679	0.0358
1	17796763	17798337	AT1G48200	-	26.7	-1	0.413	0.558
1	17798430	17802330	AT1G48210	+	13.1	-0.3	0.33	0.48
1	17805760	17808993	AT1G48230	+	16.4	-15.5	0.0576	0.158
1	17808987	17812106	AT1G48240	-	13.9	-8.8	0.499	0.631
1	17847041	17848338	AT1G48300	+	8.4	-3.8	0.0136	0.0592
1	17854812	17855715	AT1G48320	-	5.2	-3.5	0.0755	0.187
1	17867101	17868432	AT1G48350	+	13.1	10.2	0.0897	0.207
1	17886035	17892632	AT1G48410	-	37.1	-3.8	0.0014	0.0107
1	17895783	17898813	AT1G48420	-	20.7	-20.7	0.0506	0.145
1	17902631	17906873	AT1G48430	-	29.1	17.7	0.0594	0.161
1	17906870	17908534	AT1G48440	+	47.2	-46.3	0.0937	0.213
1	17908502	17910523	AT1G48450	-	6.6	2	0.097	0.217
1	17910778	17913344	AT1G48460	+	7.7	-2.7	0.192	0.334
1	17918206	17921116	AT1G48480	+	76	-76	0.112	0.237
1	17921899	17928954	AT1G48490	-	81.4	-80.4	0.535	0.66
1	17940049	17942864	AT1G48520	+	13.5	3.9	0.581	0.696
1	17945368	17950598	AT1G48540	+	46.1	42.7	0.713	0.795
1	17950568	17952743	AT1G48550	-	38.3	-31	0.000113	0.00152
1	17953869	17957719	AT1G48570	-	32	-26.8	0.406	0.551
1	17965870	17969354	AT1G48600	+	25.2	-8.1	0.000161	0.00204
1	17970610	17973402	AT1G48610	-	48.2	43.4	0.28	0.43
1	17973641	17976663	AT1G48620	-	33.1	21	0.577	0.693
1	17981635	17983377	AT1G48630	-	17.5	-15.3	0.000756	0.00668
1	17983645	17986292	AT1G48635	+	37.7	-27	0.297	0.447
1	17989130	17995339	AT1G48650	-	26.9	-13.6	0.131	0.263
1	18030703	18031593	AT1G48745	+	7.6	-5.4	0.462	0.6
1	18035966	18036510	AT1G48750	+	2.2	-0.2	0.815	0.865
1	18035966	18039405	AT1G48760	-	22.7	7.2	0.39	0.537
1	18043671	18047806	AT1G48790	-	18.8	-18.3	2.14e-05	0.000394
1	18059449	18061302	AT1G48830	-	16	-0.6	0.0183	0.0731
1	18061355	18065031	AT1G48840	+	24	-20.4	0.138	0.271
1	18064904	18068154	AT1G48850	-	15.7	-9.6	0.00116	0.00927
1	18068697	18071667	AT1G48860	-	12.7	-10.9	0.0822	0.197
1	18084714	18087934	AT1G48900	-	20.3	15.9	0.441	0.583
1	18098080	18101732	AT1G48920	+	24.7	-21.4	0.134	0.266
1	18106859	18110386	AT1G48950	+	43.6	30.9	0.0675	0.174
1	18113713	18117833	AT1G48970	-	96.1	20	0.297	0.447
1	18132544	18134017	AT1G49010	+	8.5	-4.8	0.205	0.349
1	18137976	18139131	AT1G49032	+	32.3	-31.2	0.000206	0.00247
1	18139173	18149019	AT1G49040	-	290	287.5	0.259	0.409
1	18150465	18153364	AT1G49050	+	14.4	7.4	0.637	0.741
1	18174372	18176389	AT1G49130	-	19.7	6.6	0.14	0.274
1	18176771	18179264	AT1G49140	-	5.2	-1.8	0.519	0.648
1	18183183	18184583	AT1G49170	-	20.3	19.2	0.0182	0.0729
1	18184653	18187529	AT1G49180	-	462.7	462.4	0.000417	0.00422
1	18198226	18199168	AT1G49200	+	6.4	5.5	0.126	0.256
1	18215799	18218339	AT1G49240	+	40.6	15.8	0.246	0.395
1	18218340	18219269	AT1G49245	+	15.6	-10.9	0.000251	0.00289
1	18234678	18237543	AT1G49300	+	33.6	-7.5	0.00152	0.0113
1	18237700	18238497	AT1G49310	-	14.2	-11	0.302	0.452
1	18246304	18248088	AT1G49320	+	7.3	-6.4	0.721	0.8
1	18252049	18264672	AT1G49340	+	247.7	-212.7	0.0514	0.146
1	18267230	18269465	AT1G49360	-	23.5	-0.5	0.121	0.249
1	18276642	18279532	AT1G49380	+	46.5	46.2	0.000955	0.008
1	18282967	18284202	AT1G49400	+	12.4	-9.7	0.164	0.302
1	18285305	18287034	AT1G49410	-	24.6	-14	0.57	0.688
1	18290941	18295905	AT1G49430	+	16.4	15.9	0.546	0.668
1	18310427	18311714	AT1G49470	+	8.2	2.1	0.847	0.885
1	18314116	18316861	AT1G49480	-	27.6	-12.3	5.69e-05	0.000883
1	18320489	18322505	AT1G49500	-	7.7	-7.3	0.479	0.613
1	18326845	18328714	AT1G49510	+	17.2	-8.2	6.81e-05	0.00102
1	18351323	18354634	AT1G49580	+	189.4	167	0.105	0.228
1	18354743	18356733	AT1G49590	+	9.1	-4.5	0.0437	0.132
1	18356798	18360447	AT1G49600	-	15.6	9.8	0.446	0.587
1	18367589	18375494	AT1G49630	-	172.1	38.9	0.183	0.325
1	18377153	18378634	AT1G49650	-	64.5	-64.5	0.0171	0.0699
1	18378633	18379901	AT1G49660	-	19	5.5	0.071	0.18
1	18380803	18386146	AT1G49670	-	51.4	8.8	0.00041	0.00417
1	18388791	18390523	AT1G49700	-	3.5	1.9	0.793	0.851
1	18391272	18394030	AT1G49710	-	5.6	1.8	0.628	0.734
1	18402505	18405681	AT1G49730	-	46.5	-42.7	0.006	0.0328
1	18407399	18410022	AT1G49740	+	17.3	-12.2	0.73	0.806
1	18410856	18413016	AT1G49750	-	29.5	14.4	0.407	0.553
1	18416473	18420111	AT1G49760	+	29.2	-24	0.0606	0.163
1	18428787	18430497	AT1G49780	-	18.2	-15.3	0.156	0.293
1	18442881	18445350	AT1G49820	+	143.3	-131.9	0.124	0.253
1	18451745	18454463	AT1G49840	+	40.2	23.3	0.497	0.629
1	18454843	18456619	AT1G49850	-	13.3	5.9	0.129	0.26
1	18463997	18466085	AT1G49880	+	10	6	0.376	0.524
1	18470045	18473833	AT1G49890	+	31.7	2.8	0.00222	0.0153
1	18494028	18497318	AT1G49950	-	42.6	-40.4	0.00669	0.0354
1	18501569	18504654	AT1G49970	-	17	5.1	0.431	0.574
1	18504756	18506184	AT1G49975	+	15.8	-11.6	0.00128	0.00991
1	18507921	18513340	AT1G49980	+	7.5	2.3	0.84	0.88
1	18517585	18520000	AT1G50010	+	13.8	6.2	0.0334	0.11
1	18519945	18521781	AT1G50020	-	15.7	-9.5	0.0675	0.174
1	18522247	18539995	AT1G50030	-	49.5	-46.5	0.026	0.093
1	18549203	18550042	AT1G50055	-	29	-8.7	0.532	0.658
1	18561727	18566269	AT1G50120	+	46.4	13.4	0.232	0.379
1	18569685	18579182	AT1G50140	-	90.6	-23.2	0.384	0.532
1	18581997	18583832	AT1G50170	+	48.8	46.8	0.228	0.374
1	18591193	18598569	AT1G50200	-	27.9	-1.2	0.38	0.528
1	18614200	18617155	AT1G50250	-	6.2	-0.2	0.564	0.683
1	18617592	18621957	AT1G50260	-	13.2	-10.5	0.582	0.696
1	18627550	18628452	AT1G50290	-	25.4	-25.2	0.123	0.252
1	18628554	18632039	AT1G50300	-	261	260.9	0.0161	0.0671
1	18638383	18639536	AT1G50320	-	16.8	-10.2	6.7e-11	7.59e-09
1	18658507	18662052	AT1G50370	+	54.1	-54	0.228	0.374
1	18662265	18666515	AT1G50380	+	5.6	1.7	0.971	0.975
1	18672131	18677652	AT1G50410	+	53.2	-52.7	0.241	0.388
1	18677693	18680300	AT1G50420	-	10.5	3.7	0.418	0.562
1	18681931	18685652	AT1G50430	-	13.3	-5.1	0.269	0.418
1	18685768	18687907	AT1G50440	+	11.6	11.5	0.0838	0.199
1	18687784	18690503	AT1G50450	-	29.6	-29.5	0.397	0.544
1	18693643	18697709	AT1G50460	+	68	-62	0.35	0.499
1	18701881	18704938	AT1G50480	+	5	-4.3	0.19	0.332
1	18707923	18716118	AT1G50500	-	68.6	31.4	0.129	0.26
1	18716111	18719336	AT1G50510	+	370.2	368.6	0.00539	0.03
1	18726234	18728369	AT1G50570	-	17.4	-16.3	0.0225	0.0843
1	18728633	18730498	AT1G50575	-	4.4	-1.8	0.834	0.877
1	18737062	18739649	AT1G50600	-	10.1	3.6	0.402	0.548
1	18748240	18751338	AT1G50620	+	69.5	21.1	0.0437	0.132
1	18751455	18753941	AT1G50630	-	23.3	14.9	0.971	0.975
1	18756971	18758708	AT1G50640	-	5.4	-1	0.642	0.745
1	18770936	18774759	AT1G50660	+	12.4	-0.1	0.0271	0.0955
1	18774804	18777030	AT1G50670	-	13.8	11.3	0.0133	0.0585
1	18784508	18787802	AT1G50710	-	37.7	32.3	0.145	0.279
1	18795209	18802370	AT1G50730	+	535.1	-533.4	0.0547	0.152
1	18802551	18803755	AT1G50732	+	3.9	-3.3	0.741	0.813
1	18807671	18809035	AT1G50740	+	90.8	-16.4	0.54	0.664
1	18839046	18844577	AT1G50840	+	21.5	-15.6	0.000307	0.00335
1	18866196	18867204	AT1G50900	+	15.6	4.6	0.000282	0.00316
1	18870058	18872968	AT1G50920	+	26.1	-24.9	0.00762	0.0391
1	18877811	18880012	AT1G50940	-	18.8	-18.4	0.11	0.234
1	18926810	18927746	AT1G51060	+	3.4	-1.5	0.103	0.225
1	18927809	18929762	AT1G51070	+	59.1	-48.5	0.115	0.242
1	18934298	18935299	AT1G51100	+	46.4	-44	0.232	0.379
1	18935300	18937665	AT1G51110	+	8.3	-5.9	0.289	0.439
1	18943446	18945812	AT1G51140	-	7.3	-4	0.955	0.962
1	18949531	18951891	AT1G51160	+	5.7	-3.4	0.861	0.894
1	18953457	18955053	AT1G51170	-	12	-8	0.311	0.461
1	18984280	18986653	AT1G51200	+	12.4	-11	1.47e-12	2.47e-10
1	19018940	19021808	AT1G51310	-	26	23.9	0.516	0.645
1	19035643	19039398	AT1G51350	+	49	-49	0.0293	0.101
1	19044162	19044953	AT1G51360	+	55.1	-49.7	0.339	0.489
1	19050297	19052094	AT1G51390	+	23.8	7.8	0.45	0.59
1	19052022	19052582	AT1G51400	-	1.1	0.2	0.00887	0.0435
1	19068240	19069776	AT1G51430	+	45.9	-44.8	0.131	0.263
1	19097711	19101265	AT1G51500	-	5.2	1.9	0.362	0.51
1	19102790	19104933	AT1G51510	-	10	1.6	0.124	0.253
1	19115556	19117534	AT1G51540	+	5.4	3.8	0.332	0.482
1	19117031	19119382	AT1G51550	-	34.6	-12.4	0.00722	0.0375
1	19119605	19122038	AT1G51560	-	12.4	-11.9	0.256	0.406
1	19122160	19125375	AT1G51570	-	8.7	1.4	0.687	0.775
1	19125582	19128161	AT1G51580	+	42.8	-42.8	0.000357	0.00376
1	19128143	19132318	AT1G51590	-	24.3	-17.1	0.0539	0.151
1	19132220	19135630	AT1G51600	+	19.6	-10.9	0.358	0.507
1	19136213	19139989	AT1G51610	+	37.6	28.4	0.0885	0.206
1	19141822	19144320	AT1G51630	-	15.2	-15.2	0.595	0.708
1	19152507	19154051	AT1G51650	+	31.1	1.3	7.49e-05	0.0011
1	19154322	19156338	AT1G51660	+	8.7	-2.4	0.878	0.905
1	19158745	19161737	AT1G51680	-	5.3	3.1	0.465	0.602
1	19163842	19170449	AT1G51690	+	31.8	31.8	3.1e-07	1.02e-05
1	19173879	19175228	AT1G51700	+	14.8	-13.9	0.0654	0.171
1	19175608	19180195	AT1G51710	-	10.8	-6.7	0.501	0.633
1	19180743	19186532	AT1G51720	+	63.2	-62.6	0.218	0.364
1	19186487	19188805	AT1G51730	-	32.7	10.9	0.0203	0.0784
1	19188798	19191372	AT1G51740	+	15	-12.4	0.319	0.469
1	19191465	19194908	AT1G51745	+	73.5	-61.1	0.181	0.322
1	19199350	19201707	AT1G51760	+	9.7	-1.2	0.363	0.511
1	19220235	19225797	AT1G51805	-	106.4	-34.5	0.303	0.453
1	19295819	19299169	AT1G51940	-	12.6	-1.8	0.0189	0.0746
1	19305080	19307518	AT1G51950	+	10.8	-2.3	0.268	0.417
1	19323054	19326918	AT1G51980	-	12.2	1.7	0.405	0.551
1	19333087	19336135	AT1G52000	-	6.8	0.1	0.232	0.379
1	19345870	19349088	AT1G52030	-	13.8	9.5	0.213	0.358
1	19350313	19352791	AT1G52040	-	11.4	10.3	0.154	0.29
1	19383077	19385602	AT1G52100	-	82.6	-73.6	0.0296	0.102
1	19407258	19408319	AT1G52140	-	19.8	-19.8	0.0114	0.0524
1	19409687	19414764	AT1G52150	-	208.6	-197.8	0.0649	0.17
1	19434479	19439031	AT1G52190	+	26.7	-14.2	0.356	0.506
1	19441635	19443631	AT1G52200	-	34.9	26.2	0.781	0.842
1	19453434	19454765	AT1G52220	-	4.8	1.7	2.07e-07	7.22e-06
1	19454797	19455668	AT1G52230	+	4	-0.5	0.0748	0.186
1	19467814	19469586	AT1G52280	-	4	-2.1	0.732	0.807
1	19469819	19472582	AT1G52290	-	219	217.9	0.0213	0.0815
1	19474897	19476234	AT1G52300	-	12.9	5	0.000598	0.00563
1	19478065	19481154	AT1G52310	+	166.3	145.4	0.0385	0.121
1	19484220	19487997	AT1G52320	+	8.8	-2	0.595	0.708
1	19489793	19491650	AT1G52340	-	21	-19.6	0.00167	0.0122
1	19491766	19493122	AT1G52342	-	30.6	-27	0.826	0.871
1	19496460	19497720	AT1G52347	+	6.1	1.2	0.384	0.532
1	19499145	19506309	AT1G52360	+	86.7	76.8	0.0274	0.0963
1	19506355	19508934	AT1G52370	+	28.2	-28.2	0.000702	0.00639
1	19508937	19511641	AT1G52380	+	53	-50.6	0.558	0.678
[truncated: 10,572 more rows]

## Sheet: fio1_vs_col0
Figure 2 source data 4: Differential poly(A) site usage results for fip37-4 and fio1-1 identified using nanopore DRS data
chrom	start	end	gene_id	strand	earth_mover_distance	mean_change_in_tpe	p_val	fdr
1	6787	9130	AT1G01020	-	22.8	-19.7	0.0626	0.46
1	23120	31227	AT1G01040	+	110.3	110.3	0.35	0.717
1	31169	33171	AT1G01050	-	9.1	-2.7	0.124	0.529
1	33364	37871	AT1G01060	-	60.3	55.2	0.287	0.662
1	44969	47059	AT1G01080	-	9.9	-9.3	0.411	0.761
1	47233	49304	AT1G01090	-	12.6	-9.6	0.796	0.941
1	49908	51210	AT1G01100	-	3.5	-1.1	0.868	0.958
1	57163	59215	AT1G01120	-	12.3	9	0.799	0.942
1	64165	67774	AT1G01140	-	34.4	-11.3	0.577	0.856
1	72338	74096	AT1G01160	+	2.3	-1.9	0.728	0.919
1	73930	74737	AT1G01170	-	21.6	18.7	0.116	0.525
1	75389	76845	AT1G01180	+	5.3	-2.1	0.72	0.917
1	88621	90502	AT1G01210	+	54.8	53.2	0.59	0.862
1	91341	95681	AT1G01220	+	34	29.1	0.0376	0.395
1	97411	99240	AT1G01230	+	5	-0.3	0.574	0.855
1	99864	101987	AT1G01240	+	8.6	-5	0.912	0.969
1	104439	105330	AT1G01250	-	95.2	90.8	0.147	0.551
1	108945	111699	AT1G01260	+	43.8	27.7	0.485	0.81
1	114201	116407	AT1G01290	+	22.8	10.4	0.968	0.985
1	116783	118845	AT1G01300	+	7.3	1.3	0.506	0.822
1	121066	130577	AT1G01320	-	59.8	-59.7	0.165	0.564
1	136089	138162	AT1G01350	+	10.2	10.2	0.535	0.836
1	141869	143261	AT1G01360	+	9.2	9.2	0.0207	0.317
1	154366	156178	AT1G01420	-	33.5	-32	0.414	0.764
1	156476	158823	AT1G01430	-	7	-6.5	0.0261	0.349
1	159627	162953	AT1G01440	-	25.3	-17.5	0.0857	0.488
1	171524	172948	AT1G01470	-	1.5	0.6	0.574	0.855
1	180016	182749	AT1G01490	-	19.4	-13	0.0185	0.305
1	185032	187135	AT1G01500	+	17.5	15	0.827	0.95
1	187144	190472	AT1G01510	+	16	7.9	0.322	0.693
1	195644	198787	AT1G01540	+	69.5	-61.5	0.0461	0.416
1	199526	201775	AT1G01550	+	14.9	11	0.0691	0.468
1	221641	224351	AT1G01610	-	34.7	33.7	0.392	0.748
1	225664	227543	AT1G01620	-	7.6	-5.5	0.0318	0.374
1	228798	230979	AT1G01630	+	23.7	-14.2	0.584	0.859
1	232839	237905	AT1G01650	-	22.7	19.9	0.851	0.956
1	262827	266324	AT1G01710	+	29.9	-23.8	0.457	0.79
1	267992	269819	AT1G01720	+	8.3	6.3	0.365	0.728
1	269791	270859	AT1G01725	-	4.6	-3.4	0.767	0.934
1	270796	272189	AT1G01730	+	5.4	4.2	0.493	0.815
1	278599	282891	AT1G01770	+	215.1	208.3	0.203	0.592
1	284349	291203	AT1G01790	+	12.4	8.4	0.858	0.958
1	293245	295086	AT1G01800	+	5	4.8	0.0451	0.415
1	296000	298334	AT1G01820	-	37.8	-28.3	0.786	0.939
1	304132	306310	AT1G01860	-	12.8	11.9	0.415	0.764
1	313100	316090	AT1G01910	-	72	-65.5	0.466	0.797
1	315982	319667	AT1G01920	+	25.5	-25	0.801	0.943
1	319768	322895	AT1G01930	-	35.3	24.5	0.828	0.95
1	322885	324917	AT1G01940	+	4.5	-0.5	0.457	0.79
1	325315	330619	AT1G01950	+	47.1	36.4	0.664	0.896
1	330587	337912	AT1G01960	-	19.6	-2	0.888	0.962
1	338240	340088	AT1G01970	+	11.5	11	0.421	0.767
1	342917	344400	AT1G01990	-	10.8	-9.4	0.6	0.868
1	345515	347603	AT1G02000	+	6.6	4.5	0.919	0.97
1	347612	352545	AT1G02010	+	16.7	-16.7	0.0648	0.463
1	352611	355124	AT1G02020	-	10.5	8.7	0.379	0.738
1	373334	386913	AT1G02080	+	52.4	-51.6	0.402	0.754
1	387276	389808	AT1G02090	-	102.3	98.5	0.00133	0.0872
1	389811	392816	AT1G02100	+	40.5	-36.6	0.199	0.59
1	392830	395528	AT1G02110	+	54.7	-54.7	0.155	0.556
1	395688	400001	AT1G02120	+	40.5	38.4	0.612	0.875
1	399982	401919	AT1G02130	-	4.8	-0.6	0.702	0.912
1	403099	404456	AT1G02140	-	5.4	3.2	0.0459	0.416
1	404599	408619	AT1G02145	+	19.9	3.1	0.821	0.949
1	408621	410680	AT1G02150	+	35.4	-30.8	0.122	0.528
1	410743	411632	AT1G02160	+	13.6	-12.7	0.302	0.675
1	411663	413554	AT1G02170	+	5.6	3.1	0.755	0.929
1	418415	422579	AT1G02205	+	63.6	55.8	0.83	0.95
1	440199	442972	AT1G02260	-	14.3	-10.4	0.56	0.85
1	443117	446296	AT1G02270	-	7.6	0.5	0.871	0.958
1	448422	450426	AT1G02280	-	18	-13.7	0.494	0.815
1	450460	452743	AT1G02290	-	169.9	169.9	0.0235	0.335
1	453106	455519	AT1G02300	+	235.3	-229.4	0.92	0.97
1	455687	458164	AT1G02305	+	6.4	-0.4	0.618	0.879
1	461945	463618	AT1G02330	-	4.5	2.9	0.577	0.856
1	463753	464981	AT1G02335	-	14.3	-13.5	0.876	0.959
1	465615	467880	AT1G02340	-	35.3	35.3	0.00463	0.174
1	469817	470693	AT1G02350	+	126.7	122.4	0.0902	0.493
1	474372	476612	AT1G02370	+	9.3	-4.4	0.564	0.851
1	476944	479112	AT1G02380	+	160.5	-130.1	0.0807	0.482
1	486799	489651	AT1G02400	+	32.8	18.7	0.443	0.781
1	490859	492979	AT1G02410	+	4.6	3.2	0.643	0.888
1	513698	515422	AT1G02475	-	29.7	-26.4	0.604	0.87
1	518090	520495	AT1G02500	+	2.9	1.8	0.122	0.528
1	537739	540127	AT1G02560	+	6.3	0.4	0.0013	0.0856
1	553018	556152	AT1G02610	-	10.7	-7.4	0.712	0.915
1	564017	567771	AT1G02640	+	30.3	-23.6	0.359	0.723
1	571825	575085	AT1G02660	-	15.3	14.5	0.077	0.479
1	580624	582310	AT1G02680	+	16.3	-2.4	0.419	0.766
1	584133	587327	AT1G02690	+	6.4	4.4	0.409	0.76
1	591681	594264	AT1G02720	+	61.1	-61	0.22	0.606
1	599329	602199	AT1G02740	-	27.8	23.4	0.226	0.609
1	602488	604387	AT1G02750	+	15.5	-7.7	0.617	0.878
1	607798	609534	AT1G02780	-	4.2	-0.7	0.0608	0.456
1	621452	623054	AT1G02816	+	13.1	-12.4	0.397	0.75
1	623655	624567	AT1G02820	-	6.9	4.4	0.588	0.861
1	626638	629993	AT1G02840	+	7.8	2.5	0.744	0.925
1	630373	633420	AT1G02850	+	27	-6.4	0.0422	0.407
1	635143	637262	AT1G02860	+	10	-8.8	0.0545	0.441
1	637213	638681	AT1G02870	-	1.5	0.6	0.963	0.983
1	642504	644903	AT1G02880	-	18.2	-4.7	0.165	0.564
1	645083	652001	AT1G02890	-	8.9	-3.6	0.719	0.917
1	653603	654457	AT1G02900	-	7.4	-5.5	0.572	0.855
1	655567	658216	AT1G02910	-	12.8	12.7	0.0713	0.471
1	661087	662475	AT1G02930	-	42.6	-39.2	0.121	0.528
1	666806	669919	AT1G02960	-	22.2	-18	0.203	0.592
1	681330	687385	AT1G02990	-	111	-111	0.0485	0.42
1	687794	692660	AT1G03000	-	31.2	26.9	0.953	0.981
1	697918	698591	AT1G03020	-	14	-11.6	0.437	0.776
1	701364	703929	AT1G03030	+	18.8	-9.4	0.12	0.528
1	703846	706689	AT1G03040	-	4.3	3.8	0.22	0.606
1	710017	711857	AT1G03055	-	54.4	-54.4	0.0968	0.503
1	712439	727553	AT1G03060	-	131.5	-124.5	0.235	0.62
1	731553	738306	AT1G03080	-	42.3	28.5	0.0579	0.451
1	739543	744184	AT1G03090	+	28.9	14.7	0.152	0.552
1	748100	749034	AT1G03106	-	7.7	7.1	0.417	0.766
1	749245	751976	AT1G03110	+	9.5	8.7	0.351	0.718
1	753306	754262	AT1G03130	-	3.3	2.8	0.0376	0.395
1	754260	756303	AT1G03140	-	11.6	-5.7	0.385	0.743
1	756413	758678	AT1G03150	+	8.6	-8.5	0.0367	0.39
1	761260	766194	AT1G03160	+	60.7	60.6	0.784	0.938
1	782903	784346	AT1G03210	+	8.4	6.6	0.714	0.916
1	786831	788722	AT1G03220	+	4	2.4	0.773	0.935
1	789819	791689	AT1G03230	+	8.1	0.8	0.718	0.917
1	793314	795403	AT1G03250	-	7.2	-4.8	0.597	0.866
1	795448	798491	AT1G03260	-	4.7	3.2	0.953	0.981
1	802969	807066	AT1G03280	+	54.1	54	0.0444	0.412
1	807360	813216	AT1G03290	+	9.5	9.1	0.185	0.578
1	813412	816812	AT1G03310	+	18.5	-13.9	0.226	0.609
1	817933	819563	AT1G03330	-	2.4	2.3	0.367	0.729
1	822581	824410	AT1G03350	-	18.6	15.1	0.277	0.655
1	824516	826399	AT1G03360	+	11.3	-11.1	0.415	0.764
1	826522	830393	AT1G03365	+	18.7	15.4	0.586	0.86
1	830549	835411	AT1G03370	+	25.1	-17.8	0.824	0.949
1	835766	841373	AT1G03380	+	44.1	-43.5	0.348	0.715
1	842658	844251	AT1G03400	-	7.3	5	0.149	0.552
1	844435	847683	AT1G03410	-	189.7	-177.4	0.163	0.561
1	845676	847683	AT1G04183	+	16.1	-14.3	0.726	0.919
1	846663	847739	AT1G03420	+	9.9	-0.9	0.42	0.767
1	847792	849621	AT1G03430	+	10	1.2	0.343	0.71
1	852150	854297	AT1G03440	+	34.8	6.1	0.00675	0.204
1	868852	871308	AT1G03475	-	4.9	3.2	0.871	0.958
1	877860	880259	AT1G03520	-	9.7	5.6	0.167	0.565
1	890154	892492	AT1G03560	-	11	11	0.531	0.834
1	894237	897718	AT1G03590	-	13.6	-10.6	0.811	0.946
1	898479	899794	AT1G03600	+	5.5	0.9	0.423	0.769
1	900731	903070	AT1G03610	+	8.6	-0.8	0.296	0.672
1	907522	909650	AT1G03630	+	3.2	0.8	0.159	0.56
1	916771	918064	AT1G03680	-	4	0.4	0.08	0.482
1	918284	920592	AT1G03687	+	2.6	-0.4	0.865	0.958
1	930714	931985	AT1G03730	-	4.1	-3.7	0.767	0.934
1	933425	937152	AT1G03740	+	11.6	3	0.608	0.873
1	941061	943377	AT1G03760	-	3.7	0	0.827	0.95
1	959789	960916	AT1G03820	-	8.5	-5.4	0.656	0.894
1	975870	977911	AT1G03850	-	18.2	10.7	0.92	0.97
1	979306	982002	AT1G03860	-	4.7	1.2	0.213	0.602
1	982380	983544	AT1G03870	-	9.3	4.7	0.191	0.583
1	991105	993126	AT1G03900	+	6.9	6.5	0.0188	0.306
1	996075	1000629	AT1G03910	+	11.4	6.5	0.272	0.651
1	1004687	1008370	AT1G03930	+	19.8	19.2	0.197	0.588
1	1011150	1013365	AT1G03950	-	12.3	5.3	0.695	0.911
1	1018099	1019247	AT1G03970	+	15.9	-6	0.564	0.851
1	1027852	1029119	AT1G04000	-	64.2	-56.6	0.553	0.847
1	1042361	1043887	AT1G04040	-	8.4	8.2	0.0836	0.485
1	1050504	1051194	AT1G04070	-	10.4	-8.4	0.52	0.829
1	1051311	1056827	AT1G04080	+	83.9	-38.6	0.264	0.642
1	1064263	1071080	AT1G04120	-	140.7	139.6	0.251	0.633
1	1073273	1075568	AT1G04130	+	37.9	-12.3	0.283	0.659
1	1075542	1080630	AT1G04140	-	18.4	-9.2	0.561	0.85
1	1096881	1099901	AT1G04170	+	7.6	3	0.308	0.682
1	1106353	1108725	AT1G04190	-	8.3	6.5	0.264	0.642
1	1109394	1114155	AT1G04200	+	97.3	-91.1	0.158	0.559
1	1114374	1119739	AT1G04210	+	17.8	0.7	0.826	0.95
1	1128148	1129689	AT1G04240	-	4.1	0.4	0.205	0.594
1	1136077	1138663	AT1G04250	+	13.4	10.5	0.0124	0.255
1	1140277	1141564	AT1G04260	-	6.8	-0.9	0.223	0.607
1	1141557	1143130	AT1G04270	-	1.9	1.3	0.224	0.608
1	1143435	1147091	AT1G04280	-	4.2	1.2	0.802	0.943
1	1147296	1148533	AT1G04290	-	24.2	20.5	0.638	0.886
1	1148563	1154667	AT1G04300	-	59	-43.2	0.0743	0.476
1	1162904	1164861	AT1G04340	-	7.6	-4.6	0.469	0.798
1	1164909	1167135	AT1G04350	+	4	0.7	0.453	0.787
1	1185511	1188696	AT1G04400	-	12.3	12.3	0.0747	0.477
1	1188994	1191458	AT1G04410	-	10.3	-5.3	0.351	0.718
1	1191518	1193884	AT1G04420	+	1.9	0.9	0.636	0.885
1	1197955	1201579	AT1G04430	+	4.7	2.9	0.706	0.913
1	1202159	1206009	AT1G04440	+	7.9	7.1	0.303	0.677
1	1215924	1217471	AT1G04480	+	24.2	19.6	0.177	0.57
1	1226482	1230947	AT1G04510	+	17.5	-5.6	0.254	0.635
1	1231451	1234032	AT1G04520	+	29.6	9.5	0.544	0.84
1	1234175	1236206	AT1G04530	-	12	1.8	0.0138	0.269
1	1240293	1242157	AT1G04550	+	3.9	-2.1	0.111	0.519
1	1244946	1246059	AT1G04560	+	12.6	6.3	0.224	0.608
1	1258555	1261470	AT1G04590	-	10.7	5.9	0.537	0.837
1	1289733	1291112	AT1G04630	-	12	-11.8	0.00807	0.219
1	1292022	1293398	AT1G04640	+	3.8	-2.9	0.678	0.902
1	1303466	1307973	AT1G04680	-	33.7	12.9	0.562	0.85
1	1313442	1315823	AT1G04690	+	5.3	-2.5	0.528	0.833
1	1321884	1324840	AT1G04710	+	7.4	7.4	0.837	0.951
1	1331465	1333651	AT1G04750	-	5.4	2.6	0.346	0.714
1	1336273	1337849	AT1G04770	-	3.1	0.5	0.986	0.992
1	1340552	1343793	AT1G04780	-	11.4	9.2	0.0384	0.396
1	1344988	1348868	AT1G04790	+	12.4	11.2	0.876	0.959
1	1348451	1349478	AT1G04800	-	68.4	67.4	0.008	0.219
1	1350079	1355466	AT1G04810	+	12.6	7.1	0.183	0.576
1	1356083	1358547	AT1G04820	-	17.8	-6.9	0.151	0.552
1	1358573	1362019	AT1G04830	-	20.2	0.6	0.232	0.616
1	1365106	1368940	AT1G04850	-	8.1	-0.7	0.755	0.929
1	1369035	1373103	AT1G04860	-	8.7	-2.3	0.658	0.894
1	1373233	1375821	AT1G04870	-	19.3	15.1	0.0178	0.3
1	1383840	1387895	AT1G04900	+	110.8	-106.5	0.166	0.565
1	1387870	1391381	AT1G04910	-	9	-2.3	0.894	0.963
1	1399173	1403112	AT1G04945	+	144.4	-132.5	0.0123	0.255
1	1399181	1400830	AT1G04940	+	9.4	6.1	0.00977	0.235
1	1403084	1407531	AT1G04950	-	28.9	24.2	0.48	0.806
1	1407771	1410933	AT1G04960	-	5.5	1.8	0.538	0.837
1	1411087	1413627	AT1G04970	+	7	6.2	0.57	0.854
1	1413643	1416218	AT1G04980	-	12	-9.1	0.16	0.56
1	1416341	1419027	AT1G04985	-	71.6	67.3	0.0188	0.306
1	1425538	1428869	AT1G05000	+	93.2	84.4	0.162	0.56
1	1431176	1433010	AT1G05010	-	10.1	10.1	0.659	0.894
1	1438047	1441933	AT1G05030	-	7	4.9	0.424	0.769
1	1448630	1450901	AT1G05055	-	7.6	4.4	0.605	0.871
1	1451001	1452872	AT1G05060	-	4.5	0.7	0.496	0.816
1	1457006	1458802	AT1G05070	-	6.1	5.4	0.598	0.867
1	1463107	1464173	AT1G05087	+	9.7	8.1	0.383	0.741
1	1464238	1465875	AT1G05090	+	5.1	2.4	0.804	0.943
1	1471322	1476289	AT1G05120	-	9.7	6.7	0.936	0.975
1	1477486	1478900	AT1G05135	-	53	52	0.135	0.542
1	1482545	1484059	AT1G05140	+	46.3	-37	0.106	0.515
1	1484066	1486960	AT1G05150	-	6	-0.8	0.948	0.979
1	1490973	1494248	AT1G05170	-	26.4	-15.7	0.949	0.979
1	1498113	1501953	AT1G05180	-	19.6	19.4	0.108	0.517
1	1502250	1503853	AT1G05190	-	4.5	2.3	0.815	0.947
1	1504940	1509152	AT1G05200	+	24.9	-22.7	0.83	0.95
1	1509102	1510341	AT1G05205	-	15.1	-12.7	0.0335	0.381
1	1512895	1518900	AT1G05230	-	8.5	-5.6	0.706	0.913
1	1529766	1531484	AT1G05260	+	5.6	5.6	0.213	0.602
1	1531640	1534767	AT1G05270	-	9.9	-1.6	0.475	0.803
1	1553567	1557848	AT1G05320	+	28.2	26.5	0.571	0.854
1	1558777	1559917	AT1G05340	-	2.3	1.2	0.887	0.962
1	1560677	1564409	AT1G05350	-	21	2.9	0.422	0.769
1	1564490	1567508	AT1G05360	+	7	7	0.272	0.651
1	1576821	1582672	AT1G05380	+	60.6	59.6	0.0897	0.492
1	1582670	1583760	AT1G05385	-	7.8	-6	0.281	0.657
1	1585370	1587794	AT1G05410	-	6.2	5.6	0.445	0.781
1	1594052	1595923	AT1G05430	-	9.6	-9.2	0.525	0.831
1	1607201	1611840	AT1G05470	-	11.7	11.3	0.463	0.795
1	1624918	1629289	AT1G05500	+	11.5	11.4	0.0386	0.397
1	1630848	1636018	AT1G05520	-	41.5	29.3	0.238	0.624
1	1645299	1647435	AT1G05562	+	81.9	81.6	0.0108	0.245
1	1645299	1647435	AT1G05560	-	95.4	-76.1	0.632	0.885
1	1647574	1659611	AT1G05570	-	7.8	-2.7	0.802	0.943
1	1669349	1671902	AT1G05590	+	17.2	12.7	0.96	0.982
1	1671915	1673923	AT1G05600	+	12.5	10.7	0.148	0.551
1	1678880	1681710	AT1G05620	+	18.7	18.5	0.83	0.95
1	1703001	1704838	AT1G05680	-	19.2	15.9	0.558	0.849
1	1717388	1718909	AT1G05720	-	4.2	3.2	0.832	0.95
1	1730241	1732657	AT1G05785	+	25.9	21.1	0.71	0.914
1	1732801	1737583	AT1G05790	+	5.3	-5.2	0.757	0.929
1	1744443	1747734	AT1G05805	+	177.2	-176.9	0.0546	0.441
1	1748258	1749526	AT1G05810	+	69.4	-53.2	0.814	0.947
1	1754129	1761909	AT1G05830	+	128.4	-110.1	0.458	0.791
1	1762144	1762814	AT1G05835	+	9.1	4.1	0.811	0.946
1	1762733	1766283	AT1G05840	-	30.1	29.1	0.278	0.655
1	1766502	1768837	AT1G05850	-	2.8	2.8	0.0388	0.398
1	1768985	1771286	AT1G05860	+	80	-74.9	0.148	0.551
1	1771384	1773385	AT1G05870	-	145.1	-145.1	0.000943	0.0704
1	1779255	1784675	AT1G05890	+	25.7	9.9	0.157	0.557
1	1786848	1789737	AT1G05900	+	13.3	11.7	0.183	0.576
1	1790215	1796715	AT1G05910	+	74.6	66.2	0.258	0.638
1	1801109	1804000	AT1G05940	-	14.9	10	0.0835	0.485
1	1807959	1815568	AT1G05960	-	15.3	-14.7	0.594	0.864
1	1815824	1817336	AT1G05970	-	13.9	13	0.422	0.768
1	1820307	1821894	AT1G06000	-	9.6	0.9	0.555	0.847
1	1822582	1824236	AT1G06010	+	12.9	-7.3	0.27	0.649
1	1828339	1829983	AT1G06040	-	5.9	-5.6	6.92e-06	0.00249
1	1832940	1834861	AT1G06060	+	3.8	-1.4	0.439	0.777
1	1834828	1837758	AT1G06070	-	15.5	0.8	0.863	0.958
1	1843462	1846311	AT1G06080	+	11.2	-5.9	0.673	0.9
1	1853058	1855378	AT1G06110	-	10.7	9.2	0.694	0.91
1	1857756	1860938	AT1G06130	-	14.7	10.1	0.732	0.921
1	1868988	1873730	AT1G06150	-	20	-0.6	0.0495	0.424
1	1889361	1891276	AT1G06180	+	15	3	0.914	0.969
1	1892230	1894194	AT1G06190	-	18.7	9.4	0.0945	0.5
1	1894288	1897027	AT1G06200	-	6.2	3.6	0.765	0.933
1	1897128	1899237	AT1G06210	+	17.1	-14	0.185	0.578
1	1899950	1904897	AT1G06220	+	102.5	102.5	0.261	0.64
1	1906962	1911056	AT1G06230	+	67.1	60.9	0.464	0.796
1	1911094	1913295	AT1G06240	+	39.1	32.3	0.787	0.939
1	1922207	1926278	AT1G06290	+	16.9	12.8	0.261	0.64
1	1938861	1940496	AT1G06360	-	14.6	-6.7	0.178	0.572
1	1944992	1946303	AT1G06380	+	47.9	-29.3	0.735	0.922
1	1946745	1950860	AT1G06390	+	12.4	11.1	0.36	0.723
1	1950595	1952880	AT1G06400	-	13.1	-0.3	0.0227	0.329
1	1954673	1958866	AT1G06410	+	7.5	3.3	0.793	0.94
1	1960030	1963189	AT1G06430	-	13	12.4	0.588	0.861
1	1967086	1969656	AT1G06460	-	21	-4.6	0.136	0.543
1	1969657	1974526	AT1G06470	+	27.9	22.1	0.947	0.978
1	1989478	1990730	AT1G06500	+	10.2	9.8	0.44	0.778
1	1990633	1992228	AT1G06515	-	12.1	-8.6	0.214	0.602
1	1992228	1993841	AT1G06510	+	6	-5.1	0.502	0.82
1	2001381	2002802	AT1G06530	+	94.7	-87.3	0.249	0.632
1	2003626	2007212	AT1G06550	-	17.1	14	0.837	0.951
1	2007614	2012006	AT1G06560	+	15.8	10.8	0.795	0.941
1	2011884	2013545	AT1G06570	-	22.3	-2.3	0.0136	0.269
1	2027605	2031388	AT1G06630	+	295	294.7	0.0563	0.448
1	2031625	2034112	AT1G06640	+	6.9	-1.7	0.526	0.831
1	2034155	2035824	AT1G06645	+	158.1	-147.8	0.0852	0.487
1	2035717	2037366	AT1G06650	+	32.4	29.2	0.539	0.838
1	2040409	2047655	AT1G06670	+	136.1	131.3	0.157	0.557
1	2047633	2049439	AT1G06680	+	3.7	-0.5	0.0454	0.415
1	2049399	2052170	AT1G06690	-	9	3.2	0.0508	0.428
1	2052369	2055548	AT1G06700	-	7.7	7.5	0.348	0.715
1	2060443	2067483	AT1G06720	-	64.5	62.7	0.701	0.912
1	2067508	2070455	AT1G06730	+	26.2	21.6	0.968	0.985
1	2076503	2077767	AT1G06760	-	2.7	0.9	0.641	0.887
1	2078879	2082097	AT1G06770	-	21.1	18.4	0.693	0.909
1	2087181	2089786	AT1G06790	+	14.7	-10.7	0.515	0.826
1	2089416	2091686	AT1G06800	-	13.3	-7	0.958	0.982
1	2092945	2096784	AT1G06820	-	3	-1.3	0.911	0.969
1	2097105	2097655	AT1G06830	+	16.9	16.9	0.0764	0.479
1	2097746	2103507	AT1G06840	-	41.1	-39.5	0.209	0.598
1	2108511	2110986	AT1G06870	+	5.1	4.6	0.617	0.878
1	2111322	2114686	AT1G06890	-	27.7	11.7	0.119	0.527
1	2114764	2120745	AT1G06900	-	84	83.5	0.326	0.696
1	2130052	2135703	AT1G06950	-	5.5	-3.6	0.748	0.927
1	2135809	2137838	AT1G06960	+	21.2	-14	0.0338	0.381
1	2152797	2155269	AT1G07010	+	33.9	-28.4	0.581	0.858
1	2155212	2156153	AT1G07020	-	5.3	-1.8	0.532	0.835
1	2158412	2160818	AT1G07030	-	20.6	15	0.209	0.598
1	2160918	2163387	AT1G07040	-	3.6	-2.2	0.803	0.943
1	2168560	2169957	AT1G07070	+	8.2	-5.6	0.981	0.99
1	2169976	2172194	AT1G07080	+	22.3	-10.2	0.541	0.838
1	2173951	2174894	AT1G07090	-	14.8	3.1	0.149	0.552
1	2178021	2184193	AT1G07110	-	38.6	8.4	0.364	0.727
1	2187565	2188734	AT1G07128	-	21.1	20.3	0.169	0.566
1	2187775	2188733	AT1G07130	+	21	-20.2	0.298	0.674
1	2189876	2190784	AT1G07135	-	23.6	23.1	0.0453	0.415
1	2191678	2193836	AT1G07140	-	5.6	-1.2	0.6	0.868
1	2199996	2201272	AT1G07170	+	6.3	-3.6	0.148	0.551
1	2204103	2207099	AT1G07180	+	4.1	1.5	0.508	0.824
1	2208476	2212718	AT1G07200	-	10.1	7.5	0.469	0.798
1	2215215	2216982	AT1G07210	+	6.5	5.6	0.727	0.919
1	2216924	2219649	AT1G07220	-	24.9	24.9	0.0115	0.252
1	2220180	2223018	AT1G07230	-	34.6	34.4	0.00307	0.143
1	2223624	2225524	AT1G07240	+	12.1	11.2	0.233	0.618
1	2225758	2227608	AT1G07250	+	5.9	3	0.868	0.958
1	2238016	2241471	AT1G07280	+	21.2	17.3	0.106	0.515
1	2245692	2247240	AT1G07300	-	6.1	-5	0.936	0.975
1	2247111	2248961	AT1G07310	-	25.7	22	0.398	0.751
1	2248966	2250529	AT1G07320	+	9.9	-1.8	0.000712	0.0585
1	2257383	2260187	AT1G07350	-	16.8	-7.2	0.426	0.771
1	2260316	2262923	AT1G07360	-	4.3	1.5	0.475	0.803
1	2263036	2264553	AT1G07370	+	10.9	4	0.523	0.83
1	2264633	2269121	AT1G07380	-	31.7	28.4	0.764	0.933
1	2277554	2280502	AT1G07420	+	7.1	5.3	0.109	0.518
1	2286184	2287791	AT1G07440	-	7.3	4	0.742	0.924
1	2291368	2294558	AT1G07470	+	15.6	9.3	0.87	0.958
1	2296022	2299544	AT1G07480	-	60.5	60.5	0.0137	0.269
1	2301379	2302021	AT1G07490	-	27.2	-26.9	0.702	0.912
1	2304434	2312399	AT1G07510	+	60.8	60.8	0.171	0.567
1	2309533	2312385	AT1G07520	-	36.9	-24	0.62	0.88
1	2313580	2316507	AT1G07530	-	8.4	8.3	0.196	0.587
1	2331135	2333767	AT1G07570	-	13.4	-11	0.0575	0.45
1	2336476	2339391	AT1G07590	-	3.2	-1.8	0.0669	0.466
1	2338903	2339321	AT1G07600	-	2	-0.5	0.29	0.666
1	2341446	2342148	AT1G07610	+	2.1	2.1	0.374	0.734
1	2348914	2351799	AT1G07630	+	12.7	-12.6	0.434	0.775
1	2353030	2356413	AT1G07640	-	6	1	0.951	0.98
1	2359110	2366736	AT1G07650	-	140.3	127.5	0.299	0.674
1	2368832	2369735	AT1G07660	+	2.3	1.6	0.72	0.917
1	2370019	2374607	AT1G07670	-	11.6	-0.1	0.822	0.949
1	2379594	2381390	AT1G07700	+	8.1	-7.6	0.0296	0.365
1	2381554	2386157	AT1G07705	+	26.1	-19.9	0.886	0.962
1	2390530	2392628	AT1G07720	-	8.6	1.2	0.818	0.948
1	2394984	2397399	AT1G07728	+	16.6	-13	0.117	0.525
1	2400588	2402942	AT1G07745	-	41.8	41.1	0.556	0.848
1	2403991	2406049	AT1G07750	-	96.4	-91.1	0.159	0.559
1	2407410	2409697	AT1G07770	-	6.1	1	0.00594	0.192
1	2409864	2412777	AT1G07780	-	11.2	-1.3	0.749	0.927
1	2412937	2413790	AT1G07790	+	5.3	0.5	0.287	0.662
1	2416177	2420829	AT1G07810	+	17.5	-16.7	0.348	0.715
1	2421088	2422066	AT1G07820	-	26.1	23.3	0.443	0.781
1	2422125	2423803	AT1G07830	+	7.6	-6	0.522	0.83
1	2424044	2426728	AT1G07840	+	99.1	-82.2	0.68	0.903
1	2428772	2432091	AT1G07870	-	36.1	-36	0.127	0.531
1	2437280	2439665	AT1G07890	+	16.9	16.4	0.0577	0.45
1	2443917	2445140	AT1G07902	+	287.8	286.7	0.201	0.591
1	2454770	2457321	AT1G07920	+	7.3	2.7	0.0439	0.412
1	2458183	2460817	AT1G07930	+	14.5	3.9	0.0123	0.255
1	2462948	2465545	AT1G07940	-	11	0.4	0.00325	0.148
1	2465728	2467165	AT1G07950	-	6.4	5	0.0743	0.476
1	2467144	2469316	AT1G07960	+	8.3	-6	0.319	0.69
1	2469217	2472806	AT1G07970	-	67.7	-43.4	0.893	0.963
1	2473164	2475128	AT1G07980	-	12.3	-10.4	0.105	0.515
1	2476952	2483196	AT1G07990	+	17.3	12.5	0.791	0.94
1	2483239	2485726	AT1G08000	-	7.5	-1.5	0.536	0.836
1	2485847	2488085	AT1G08010	-	5.6	4.3	0.848	0.953
1	2489408	2493327	AT1G08030	-	8.3	-6.6	0.804	0.943
1	2495308	2498764	AT1G08040	-	22.7	22.7	0.215	0.602
1	2535250	2537932	AT1G08110	+	5.9	5.5	0.3	0.674
1	2538073	2538238	AT1G08115	-	2.9	-2.1	0.141	0.547
1	2539613	2542362	AT1G08125	-	16.2	12.7	0.721	0.918
1	2542662	2547946	AT1G08130	-	56.5	56.3	0.138	0.545
1	2564360	2565318	AT1G08180	-	11.1	0.9	0.338	0.707
1	2567419	2573448	AT1G08190	+	8.8	-6.6	0.936	0.975
1	2573817	2576844	AT1G08200	-	8.4	7.9	0.072	0.471
1	2576983	2580754	AT1G08210	-	47.3	46	0.2	0.591
1	2581021	2583390	AT1G08220	-	21.8	-20.9	0.15	0.552
1	2583593	2586969	AT1G08230	-	256.2	255.1	0.0706	0.47
1	2588775	2590609	AT1G08250	-	10.1	4.9	0.467	0.797
1	2607876	2609971	AT1G08280	+	61.1	-60.4	0.0377	0.395
1	2620334	2621545	AT1G08315	-	12.4	10.7	0.535	0.836
1	2635938	2638004	AT1G08360	+	3.5	0.4	0.00355	0.153
1	2638036	2640663	AT1G08370	+	11.4	11.1	0.533	0.835
1	2640802	2641934	AT1G08380	-	3.7	-1.9	0.0305	0.371
1	2642071	2643285	AT1G08390	+	12.9	-5.4	0.725	0.919
1	2649458	2657120	AT1G08420	+	151.1	150.3	0.0564	0.448
1	2667797	2671957	AT1G08450	-	13.2	13.2	0.0491	0.422
1	2672197	2674721	AT1G08460	+	11.5	10.7	0.418	0.766
1	2675812	2679824	AT1G08465	+	22.4	5.1	0.507	0.823
1	2682057	2684171	AT1G08470	-	6.2	0.1	0.495	0.815
1	2684175	2685702	AT1G08480	+	2.6	0.2	0.626	0.883
1	2685658	2688658	AT1G08490	-	4.4	0.9	0.853	0.956
1	2691061	2694547	AT1G08510	-	47.2	-23.6	0.00394	0.162
1	2696380	2701022	AT1G08520	+	22.1	21.3	0.0194	0.311
1	2700980	2703162	AT1G08530	+	64.1	-59.6	0.838	0.951
1	2703294	2706860	AT1G08540	+	106.6	106.5	7.25e-05	0.0128
1	2706867	2709988	AT1G08550	+	20.8	19.5	0.216	0.603
1	2709524	2711000	AT1G08560	-	5.3	-1.9	0.483	0.808
1	2712693	2714833	AT1G08570	+	4.1	-2	0.155	0.556
1	2714993	2716532	AT1G08580	-	9.7	-5.5	0.0417	0.407
1	2723676	2733613	AT1G08600	+	104	104	0.747	0.927
1	2736655	2743881	AT1G08620	+	305.3	-284.9	0.291	0.666
1	2743760	2747967	AT1G08630	-	25.5	19	0.82	0.948
1	2748360	2751620	AT1G08640	-	5.8	0.7	0.58	0.857
1	2752123	2753809	AT1G08650	+	15.3	4	0.708	0.913
1	2756903	2759889	AT1G08660	-	27	21.9	0.252	0.634
1	2762583	2768967	AT1G08680	+	12.7	2.5	0.766	0.934
1	2769614	2771477	AT1G08700	-	9.6	5.1	0.824	0.949
1	2773940	2779308	AT1G08720	+	12.1	8.3	0.844	0.953
1	2801041	2804711	AT1G08750	+	30.9	-17.8	0.288	0.664
1	2805043	2808623	AT1G08760	+	51.7	51.4	0.771	0.935
1	2808759	2809775	AT1G08770	+	4.2	0.7	0.866	0.958
1	2809777	2811313	AT1G08780	-	3.8	1	0.703	0.913
1	2819064	2820478	AT1G08810	-	4.8	1.3	0.945	0.978
1	2821353	2825481	AT1G08820	-	45.8	43.6	0.123	0.528
1	2827059	2829315	AT1G08830	+	31	30.8	0.0937	0.498
1	2839051	2841134	AT1G08845	+	16.6	-1	0.0778	0.48
1	2846893	2848100	AT1G08880	-	18.2	-11.8	0.632	0.885
1	2848148	2852270	AT1G08890	+	63.3	54	0.365	0.728
1	2852362	2855941	AT1G08900	+	85.1	-81.1	0.162	0.56
1	2856161	2861170	AT1G08910	+	34.4	-7.7	0.84	0.951
1	2867202	2870745	AT1G08920	+	15	14	0.0241	0.339
1	2873299	2877261	AT1G08930	+	13.3	2.3	0.287	0.662
1	2877429	2879169	AT1G08940	+	19.6	-19.4	0.00936	0.228
1	2882490	2884342	AT1G08970	+	17.6	-17.2	0.104	0.514
1	2884350	2886621	AT1G08980	+	10.8	10	0.058	0.451
1	2895165	2899446	AT1G09010	-	28.4	-28.3	0.159	0.56
1	2899775	2904862	AT1G09020	-	27.1	27.1	0.24	0.625
1	2921063	2925826	AT1G09060	-	21.2	20.2	0.078	0.48
1	2927501	2929107	AT1G09070	+	4.2	-1.1	0.145	0.549
1	2936527	2939363	AT1G09100	-	8.5	3.3	0.882	0.961
1	2939567	2942345	AT1G09130	-	8.7	-6.3	0.0608	0.456
1	2942537	2945976	AT1G09140	-	31.8	15.1	0.668	0.897
1	2946029	2949159	AT1G09150	+	7.4	7.1	0.789	0.94
1	2952596	2955745	AT1G09160	-	18.7	18	0.336	0.704
1	2965022	2965972	AT1G09180	+	23.4	23	0.00989	0.236
1	2971570	2972334	AT1G09200	-	4.1	4.1	0.00113	0.0795
1	2972637	2977002	AT1G09210	-	6.1	0.9	0.919	0.97
1	2979510	2982713	AT1G09230	-	16	9.8	0.949	0.979
1	2989140	2990427	AT1G09250	+	7.4	1.7	0.0601	0.455
1	2994330	2998222	AT1G09270	+	15.1	-0.8	0.0935	0.498
1	2998099	3001362	AT1G09280	-	11.4	3.4	0.331	0.701
1	3001438	3003762	AT1G09290	-	22.3	-19.5	0.181	0.574
1	3008909	3009898	AT1G09310	+	1.6	1.3	6.11e-05	0.0119
1	3012738	3015255	AT1G09330	-	7.1	-5.1	0.862	0.958
1	3015236	3018542	AT1G09340	+	9.9	6.5	0.000395	0.0404
1	3031045	3033582	AT1G09390	+	45.2	-41.8	0.251	0.633
1	3037753	3038408	AT1G09415	-	4.7	1.2	0.6	0.868
1	3041995	3045541	AT1G09430	+	5.1	-3.4	0.218	0.605
1	3063935	3065949	AT1G09490	+	3.9	3.6	0.483	0.808
1	3066673	3068796	AT1G09500	+	17	16.9	0.00804	0.219
1	3070914	3072074	AT1G09520	-	7.6	-4.8	0.636	0.885
1	3075767	3079654	AT1G09530	+	33.4	33.3	0.19	0.581
1	3093643	3094954	AT1G09560	+	5	5	0.248	0.631
1	3095159	3100819	AT1G09570	-	12.9	12.8	0.11	0.519
1	3101148	3103677	AT1G09575	-	13.4	-13	0.112	0.519
1	3104491	3106366	AT1G09580	+	5.6	3.6	0.678	0.902
1	3106366	3107801	AT1G09590	+	11.6	-3.7	0.0164	0.291
1	3112777	3116699	AT1G09620	-	12.3	8.9	0.0932	0.497
1	3118154	3119815	AT1G09630	-	5.8	5.1	0.282	0.658
1	3119738	3122542	AT1G09640	+	7.3	-5.6	0.0164	0.291
1	3122925	3124667	AT1G09645	+	3.5	1.6	0.841	0.952
1	3127761	3131094	AT1G09660	-	5.2	-2.9	0.402	0.754
1	3136187	3137684	AT1G09690	-	7.2	-2	7e-05	0.0127
1	3137648	3140353	AT1G09700	-	33.7	30.9	0.691	0.908
1	3140861	3144381	AT1G09710	+	4.7	4.6	0.322	0.693
1	3147636	3154404	AT1G09730	-	69.1	62.1	0.263	0.641
1	3154414	3156376	AT1G09740	+	10.3	3.7	0.867	0.958
1	3157500	3159148	AT1G09750	+	8.3	7.5	0.139	0.545
1	3159124	3161692	AT1G09760	-	16.6	-0.9	0.048	0.42
1	3161831	3165616	AT1G09770	+	21.5	21.5	0.013	0.263
1	3165369	3167924	AT1G09780	-	11	10.2	0.0441	0.412
1	3173533	3176910	AT1G09795	+	20.8	15	0.0448	0.414
1	3176882	3180734	AT1G09800	-	53.4	-46.6	0.474	0.802
1	3180547	3180736	AT1G04733	-	4.9	4.3	0.931	0.973
1	3180925	3184224	AT1G09810	-	53.3	-52.3	0.141	0.548
1	3189300	3190242	AT1G09815	+	1.9	1.6	0.359	0.723
1	3192567	3195044	AT1G09830	-	11.5	1.4	0.605	0.871
1	3195718	3200403	AT1G09840	-	14.7	-8.8	0.787	0.939
1	3201684	3204150	AT1G09850	+	10.8	-9.5	0.468	0.798
1	3205578	3208714	AT1G09870	+	14.6	-8.8	0.487	0.811
1	3218132	3219929	AT1G09900	+	4	-2.5	0.0493	0.423
1	3224683	3227083	AT1G09920	-	1.4	-1	0.811	0.946
1	3236907	3239554	AT1G09940	-	17.1	-7.5	0.798	0.942
1	3252097	3255782	AT1G09970	+	12.8	-10.3	0.677	0.902
1	3256188	3261741	AT1G09980	-	36.2	28.2	0.776	0.937
1	3262221	3263642	AT1G09995	-	56	31.7	0.0602	0.455
1	3269538	3272110	AT1G10020	-	18.4	-16.7	0.389	0.746
1	3273752	3275953	AT1G10030	+	11.3	8.9	0.988	0.993
1	3284072	3287292	AT1G10060	+	32.3	6.7	0.664	0.896
1	3290310	3296198	AT1G10090	-	110.5	108	0.109	0.518
1	3304038	3306956	AT1G10120	-	1.6	-0.5	0.705	0.913
1	3310929	3322269	AT1G10130	+	91.2	-78.6	0.924	0.971
1	3322553	3323735	AT1G10140	-	11.6	-9	0.151	0.552
1	3325798	3327614	AT1G10150	+	5.7	5.6	0.0173	0.296
1	3333503	3338188	AT1G10170	-	7	3.6	0.907	0.967
1	3338184	3341628	AT1G10180	-	45.6	-42.4	0.928	0.972
1	3346382	3348139	AT1G10200	-	1.9	-0.1	0.97	0.986
1	3349081	3351180	AT1G10210	+	18.8	-12.4	0.333	0.702
1	3355674	3356151	AT1G10230	+	8.6	-6.8	0.768	0.934
1	3363431	3366493	AT1G10270	+	10.3	-8.6	0.274	0.652
1	3366492	3369125	AT1G10280	-	32.1	-24.4	0.106	0.515
1	3370401	3377463	AT1G10290	+	107.7	95.9	0.0957	0.502
1	3381446	3384003	AT1G10310	-	12	9.3	0.268	0.648
1	3392942	3395181	AT1G10350	-	27.2	-11.6	0.768	0.934
1	3395550	3396953	AT1G10360	-	8	4.8	0.623	0.881
1	3396882	3398358	AT1G10370	-	21.4	-17.4	0.116	0.525
1	3400553	3402420	AT1G10380	+	14.6	-8	0.524	0.831
1	3406955	3412874	AT1G10390	-	5.2	-5	0.156	0.556
1	3416429	3419691	AT1G10410	-	10.2	10.2	0.0789	0.481
1	3428477	3430636	AT1G10430	-	22.2	-22	0.122	0.528
1	3431763	3438370	AT1G10450	+	88.2	85.6	0.396	0.75
1	3441987	3444360	AT1G10470	-	6.2	3.8	0.388	0.745
1	3453190	3460620	AT1G10490	+	10.2	9.8	0.355	0.719
1	3459999	3461485	AT1G10500	-	14.9	14.9	0.0383	0.396
1	3461634	3465786	AT1G10510	+	30.4	29.8	0.155	0.556
1	3469511	3471488	AT1G10522	+	33.2	-31.8	0.474	0.803
1	3487385	3491277	AT1G10570	+	11.5	9.8	0.581	0.858
1	3491257	3493834	AT1G10580	-	21.1	19.8	0.213	0.602
1	3501987	3503544	AT1G10590	-	4.3	-4.1	0.299	0.674
1	3503639	3506159	AT1G10600	+	312	248.7	0.0726	0.473
1	3512738	3514824	AT1G10630	-	9.1	2.6	0.387	0.744
1	3515181	3518035	AT1G10640	-	39.4	39.2	0.0389	0.399
1	3523985	3526531	AT1G10650	-	7.6	2.5	0.588	0.862
1	3530352	3532017	AT1G10657	+	28.3	10.1	0.0846	0.485
1	3532228	3535137	AT1G10660	+	7.9	6.6	0.278	0.656
1	3535287	3538309	AT1G10670	+	13.9	13.7	0.0062	0.197
1	3544912	3545614	AT1G10682	-	1.7	-0.5	0.527	0.832
1	3554103	3556544	AT1G10700	+	12.4	-6.1	0.176	0.569
1	3562840	3564850	AT1G10720	+	19.1	11.6	0.087	0.489
1	3565256	3568106	AT1G10730	+	17.4	-12.7	0.559	0.85
1	3567904	3571053	AT1G10740	-	9.9	7.9	0.769	0.934
1	3580829	3590928	AT1G10760	-	46.2	-3.2	0.613	0.876
1	3600909	3605076	AT1G10820	-	80.5	28.2	0.101	0.511
1	3605511	3607580	AT1G10830	-	8.4	8.1	0.117	0.525
1	3607630	3610616	AT1G10840	-	3.5	3.3	0.833	0.95
1	3611489	3614613	AT1G10850	+	32.8	24.7	0.174	0.568
1	3614512	3616308	AT1G10865	-	4.5	-3.2	0.523	0.83
1	3616609	3623806	AT1G10870	-	24.6	-11.7	0.515	0.826
1	3627645	3630808	AT1G10890	+	246.6	246.6	0.0355	0.386
1	3632131	3637250	AT1G10900	-	5	0.5	0.441	0.779
1	3639834	3644187	AT1G10910	+	18.9	6.2	0.959	0.982
1	3644179	3647784	AT1G10920	-	118.9	-115.3	0.776	0.937
1	3655672	3658612	AT1G10940	-	21.2	2.9	0.584	0.86
1	3659203	3664264	AT1G10950	+	23.5	21.9	0.115	0.522
1	3664186	3665040	AT1G10960	+	4.5	2.9	0.203	0.593
1	3671755	3676133	AT1G11000	-	64.7	64.7	0.123	0.528
1	3676690	3678567	AT1G11020	+	4.6	2.1	0.639	0.887
1	3681887	3684169	AT1G11050	+	16.4	-11.8	0.499	0.818
1	3684567	3689892	AT1G11060	+	21.1	7.9	0.677	0.902
1	3694327	3698013	AT1G11080	-	18.9	-14.2	0.893	0.963
1	3702607	3703779	AT1G11090	+	4.5	-1.3	0.526	0.831
1	3722707	3727450	AT1G11130	+	10.2	-9	0.291	0.666
1	3744857	3745655	AT1G11175	+	89.2	-88.6	0.15	0.552
1	3745773	3748557	AT1G11180	+	16.6	-13.9	0.774	0.936
1	3753212	3755658	AT1G11200	+	5.7	-0.4	0.415	0.764
1	3766753	3769799	AT1G11240	-	14.7	14.2	0.294	0.67
1	3777235	3780823	AT1G11260	+	7.3	5.9	0.00441	0.17
1	3780385	3787099	AT1G11270	-	1075	1071.6	0.0768	0.479
1	3787317	3790935	AT1G11280	-	11.6	8	0.627	0.883
1	3800499	3804233	AT1G11310	-	2.7	2.4	0.742	0.924
1	3806821	3808940	AT1G11320	+	42.3	27.8	0.926	0.971
1	3809794	3813809	AT1G11330	+	51.2	45.8	0.107	0.515
1	3817423	3820887	AT1G11350	-	12.6	-6.6	0.0675	0.467
1	3821105	3823088	AT1G11360	-	46.7	-26.8	0.323	0.694
1	3832562	3834462	AT1G11380	+	18.2	-17.4	0.74	0.923
1	3834431	3837676	AT1G11390	-	36.6	-35	0.879	0.96
1	3837693	3841218	AT1G11400	+	6.2	4.2	0.635	0.885
1	3840876	3844479	AT1G11410	+	40.2	38.1	0.0853	0.487
1	3847219	3849224	AT1G11430	+	14.7	-9.8	0.748	0.927
1	3849200	3850735	AT1G11440	+	178.7	164.5	0.53	0.833
1	3853183	3855507	AT1G11450	+	41.4	40.8	0.142	0.548
1	3862398	3864074	AT1G11475	+	2.7	2.1	0.434	0.775
1	3864042	3867000	AT1G11480	-	12.1	4	0.0523	0.434
1	3874395	3875484	AT1G11530	+	3	-0.2	0.971	0.986
1	3878494	3880391	AT1G11545	-	23.2	-15.5	0.589	0.862
1	3888609	3890824	AT1G11580	+	4.1	-1.8	0.597	0.866
1	3895178	3896934	AT1G11592	-	32.4	-4.2	0.479	0.805
1	3901949	3903895	AT1G11600	+	3.8	-1	0.908	0.967
1	3912753	3914465	AT1G11630	-	30.6	-25	0.0293	0.364
1	3914773	3918243	AT1G11650	+	20.7	6.7	0.0432	0.409
1	3920477	3924566	AT1G11660	+	10	-9.8	0.433	0.775
1	3928114	3931701	AT1G11670	-	57.5	-56.8	0.377	0.736
1	3938421	3940871	AT1G11680	+	4.1	1.4	0.249	0.632
1	3945583	3946757	AT1G11700	+	38.8	-37.3	0.296	0.672
1	3951365	3957044	AT1G11720	+	30.1	-23.6	0.797	0.942
1	3967475	3969877	AT1G11750	+	19.1	-14.7	0.748	0.927
1	3969680	3971911	AT1G11755	-	66.1	65.8	0.197	0.588
1	3971985	3973294	AT1G11760	-	14.4	9.2	0.208	0.597
1	3976838	3979237	AT1G11780	-	17.8	-0.6	0.701	0.912
1	3981152	3985219	AT1G11790	+	7.5	4	0.644	0.888
1	3985183	3987290	AT1G11800	-	20.2	-2.5	0.725	0.919
1	3991026	3993707	AT1G11820	-	6	-1.8	0.817	0.948
1	3995157	3997965	AT1G11840	+	5.5	-2.9	0.00232	0.125
1	3999156	4000024	AT1G11850	+	8.4	5.4	0.634	0.885
1	4001112	4003748	AT1G11860	+	6	5.4	0.171	0.567
1	4003756	4007015	AT1G11870	+	7.1	2.6	0.362	0.724
1	4010756	4013104	AT1G11890	+	24.4	13	0.0306	0.371
1	4014781	4016544	AT1G11905	+	10.1	-6.4	0.497	0.816
1	4016711	4021043	AT1G11910	-	8.4	-3.2	0.183	0.575
1	4028594	4030656	AT1G11930	+	3.8	-0.2	0.975	0.987
1	4039565	4044046	AT1G11960	-	27.6	-26.2	0.158	0.559
1	4049895	4053871	AT1G12000	-	8.4	4.5	0.607	0.873
1	4061362	4063549	AT1G12020	-	33	28.8	0.863	0.958
1	4072740	4076207	AT1G12050	+	10.5	-2.9	0.264	0.642
1	4084161	4085185	AT1G12080	+	22.3	-17.6	0.462	0.795
1	4089663	4090857	AT1G12090	-	2	-0.3	0.7	0.911
1	4105222	4109601	AT1G12110	+	71.5	-70.7	0.0249	0.342
1	4114673	4117614	AT1G12120	-	5.7	4.5	0.645	0.889
1	4121284	4124595	AT1G12140	+	11.2	8.4	0.961	0.983
1	4137510	4140158	AT1G12200	+	10.8	8.6	0.113	0.519
1	4147961	4151056	AT1G12230	+	6.8	-6.8	0.119	0.527
1	4153640	4157653	AT1G12240	+	12.1	-6	0.48	0.806
1	4157653	4159046	AT1G12244	+	46.8	-16.6	0.808	0.945
1	4159226	4161506	AT1G12250	+	7.4	7.2	0.0022	0.121
1	4172034	4174730	AT1G12270	+	4.3	3.5	0.195	0.586
1	4186623	4190342	AT1G12320	+	466.8	-449.4	0.964	0.983
1	4186652	4188233	AT1G12310	-	5.2	-2.2	0.17	0.566
1	4194419	4196749	AT1G12330	+	10.9	3.5	0.806	0.944
1	4198336	4200849	AT1G12350	+	6.9	-4	0.929	0.972
1	4200863	4206486	AT1G12360	+	24	4.2	0.479	0.805
1	4220043	4221803	AT1G12390	+	9.9	-6.3	0.14	0.547
1	4221778	4222875	AT1G12400	+	8.4	-3.8	0.725	0.919
1	4223029	4225254	AT1G12410	+	11	-2.4	3.16e-05	0.00762
1	4233716	4238795	AT1G12430	-	58.6	47.7	0.819	0.948
1	4241420	4243229	AT1G12440	-	1.9	1.4	0.356	0.72
1	4243903	4245993	AT1G12450	+	14.1	6.2	0.522	0.83
1	4247217	4250758	AT1G12460	+	36.8	24.6	0.333	0.703
1	4250944	4257392	AT1G12470	+	10.7	2.5	0.879	0.96
1	4263149	4265156	AT1G12500	-	12	-9.5	0.299	0.674
1	4267073	4268982	AT1G12520	-	11	5.3	0.214	0.602
1	4268985	4270907	AT1G12530	-	29.1	-21.7	0.324	0.695
1	4282793	4285876	AT1G12580	+	4.9	-4.9	0.0841	0.485
1	4303279	4305907	AT1G12640	-	10.3	-2.3	0.873	0.958
1	4305790	4308007	AT1G12650	+	21.3	18.9	0.099	0.508
1	4319876	4323265	AT1G12680	-	14.2	-14.1	0.657	0.894
1	4344942	4348390	AT1G12750	-	77.4	-74.1	0.341	0.708
1	4348497	4350993	AT1G12760	+	6.8	-4.3	0.0853	0.487
1	4351018	4353797	AT1G12770	+	17.5	12.8	0.169	0.566
1	4355925	4358894	AT1G12780	-	23.8	20.8	0.629	0.884
1	4361550	4365414	AT1G12800	-	28.6	11.3	0.0286	0.361
1	4367255	4368822	AT1G12810	+	3.1	1.3	0.974	0.987
1	4368759	4371298	AT1G12820	-	4.8	0.6	0.663	0.895
1	4374204	4378514	AT1G12840	+	5.9	-3.4	0.523	0.83
1	4374248	4375247	AT1G12830	-	12.1	10.7	0.673	0.899
1	4379693	4381764	AT1G12850	-	10.7	4.5	0.0185	0.305
1	4384303	4386651	AT1G12860	+	10.6	2.5	0.518	0.828
1	4392437	4394454	AT1G12900	-	6.4	-2.7	0.0011	0.0785
1	4394896	4396291	AT1G12910	-	5.1	-4.4	0.514	0.826
1	4396347	4398193	AT1G12920	-	9.1	7.5	0.544	0.84
1	4398321	4405669	AT1G12930	-	184.3	166.5	0.199	0.59
1	4423539	4425936	AT1G12970	+	36.9	31.5	0.727	0.919
1	4433604	4436102	AT1G12990	+	9	-8.2	0.876	0.959
1	4436100	4439639	AT1G13000	-	25.1	17.1	0.302	0.675
1	4440403	4443954	AT1G13020	-	39.7	-36.2	0.0991	0.509
1	4452189	4454900	AT1G13060	+	6.8	6.7	0.139	0.545
1	4459001	4460996	AT1G13080	+	11.6	-11.2	0.0392	0.399
1	4461737	4463469	AT1G13090	+	3.6	-2.2	0.258	0.638
1	4463858	4465725	AT1G13100	+	11.7	4.9	0.122	0.528
1	4467093	4469033	AT1G13110	+	4.3	3.4	0.25	0.632
1	4469143	4473319	AT1G13120	-	38.7	37.3	0.91	0.968
1	4484583	4488577	AT1G13160	+	51.7	49.8	0.222	0.607
1	4488532	4492667	AT1G13170	-	46	45.4	0.722	0.918
1	4498763	4501624	AT1G13190	+	211.2	211	0.0136	0.269
1	4501580	4503676	AT1G13195	-	29.7	29.7	0.0798	0.482
1	4508905	4514010	AT1G13210	-	37.3	-20.5	0.846	0.953
1	4525413	4526204	AT1G13245	-	7.3	1	0.108	0.517
1	4528484	4530222	AT1G13250	-	6.6	1.7	0.371	0.732
1	4542167	4543970	AT1G13260	+	11.2	-5.9	0.0298	0.366
1	4544888	4547373	AT1G13270	+	20.5	-4.7	0.565	0.852
1	4547387	4548894	AT1G13280	+	12	-6.3	0.0536	0.439
1	4563427	4567849	AT1G13320	-	10.3	10.1	0.00906	0.226
1	4572303	4576711	AT1G13350	-	23.4	23.4	0.121	0.528
1	4576872	4578369	AT1G13360	-	20.1	-17	0.00236	0.126
1	4588993	4590501	AT1G13380	-	4.1	1.7	0.641	0.887
1	4592303	4594468	AT1G13390	-	17.9	11.5	0.0638	0.461
1	4608076	4610878	AT1G13440	-	11.3	-7.2	0.0651	0.463
1	4612730	4615353	AT1G13450	-	125.4	-82.6	0.0891	0.492
1	4615766	4618449	AT1G13460	+	27.9	27.4	0.412	0.762
1	4638467	4642190	AT1G13560	-	16.1	12.6	0.035	0.385
1	4642123	4644422	AT1G13570	-	42.3	-22.7	0.877	0.96
1	4644520	4647142	AT1G13580	-	47.7	-41.1	0.334	0.703
1	4677003	4679862	AT1G13640	-	10.8	0.9	0.698	0.911
1	4680289	4682382	AT1G13650	-	20	18.9	0.0349	0.384
1	4688017	4689265	AT1G13670	+	13.2	-11.7	0.0719	0.471
1	4693281	4694410	AT1G13690	+	61.4	-14.3	0.941	0.977
1	4694371	4696023	AT1G13700	-	6.1	5	0.529	0.833
1	4709756	4712672	AT1G13730	+	9.2	9	0.257	0.638
1	4721573	4724520	AT1G13770	+	2.9	2.9	0.641	0.887
1	4733990	4735453	AT1G13810	+	40.4	-36.6	0.38	0.739
1	4735473	4737910	AT1G13820	+	46.6	-40.8	0.254	0.635
1	4743203	4746956	AT1G13860	-	26.5	-24.7	0.154	0.554
1	4747185	4748666	AT1G13870	-	6.2	5.1	0.751	0.928
1	4748830	4751234	AT1G13880	+	8.2	8.2	0.133	0.54
1	4753098	4755656	AT1G13900	-	30.5	27	0.7	0.911
1	4760956	4762666	AT1G13930	+	5	3	4.92e-05	0.0101
1	4762478	4766852	AT1G13940	-	28.6	27.7	0.164	0.563
1	4773433	4774935	AT1G13950	+	15.9	-9.3	0.263	0.641
1	4776282	4779420	AT1G13960	+	10.1	8	0.34	0.708
1	4788462	4794654	AT1G13980	+	19.6	-6.5	0.614	0.876
1	4794663	4796599	AT1G13990	+	6.3	5.2	0.477	0.804
1	4797357	4800283	AT1G14000	+	23.6	10.2	0.0415	0.407
1	4800168	4801850	AT1G14010	-	4.2	-4	0.658	0.894
1	4802719	4805375	AT1G14020	+	6	-0.5	0.824	0.949
1	4805305	4807517	AT1G14030	-	8.6	4.5	0.162	0.56
1	4816927	4818112	AT1G14060	-	18.8	-5.6	0.192	0.583
1	4833395	4835089	AT1G14120	-	8.7	2.1	0.703	0.913
1	4835723	4837771	AT1G14130	-	9.6	-7.4	0.336	0.705
1	4837926	4839633	AT1G14140	-	1.7	0.7	0.989	0.994
1	4839800	4840823	AT1G14150	+	27.5	26.3	0.845	0.953
1	4842274	4842469	AT1G05057	+	5.6	4.8	0.448	0.782
1	4854223	4855287	AT1G14200	-	15.4	-1.7	0.17	0.566
1	4855532	4856762	AT1G14205	+	29.6	10.1	0.756	0.929
1	4856777	4857975	AT1G14210	-	8.4	2.5	0.5	0.818
1	4861167	4864094	AT1G14230	+	11	10.2	0.105	0.515
1	4868345	4871488	AT1G14250	+	25.9	-16	0.881	0.961
1	4874874	4877256	AT1G14270	-	8.9	-6.9	0.4	0.752
1	4877505	4879307	AT1G14280	+	19	-13.5	0.00601	0.193
1	4880029	4882265	AT1G14290	-	7	3.6	0.457	0.79
1	4882335	4884818	AT1G14300	-	23.2	17	0.639	0.887
1	4884950	4886793	AT1G14310	+	3.4	2.4	0.047	0.418
1	4888113	4889704	AT1G14320	+	7.4	-3.4	0.00391	0.162
1	4890068	4892332	AT1G14330	-	47.2	42.7	0.0992	0.509
1	4897345	4899035	AT1G14340	+	123	120.3	0.867	0.958
1	4899044	4900054	AT1G14345	+	5.4	4.3	0.0395	0.4
1	4907886	4911168	AT1G14350	+	21.4	4.9	0.485	0.81
1	4911092	4913167	AT1G14360	-	5.4	-3.8	0.387	0.745
1	4915490	4918138	AT1G14370	+	8.8	-2	0.467	0.797
1	4918009	4921682	AT1G14380	-	7.5	5	0.817	0.948
1	4926485	4928812	AT1G14400	-	3.5	2.5	0.21	0.599
1	4928920	4931080	AT1G14410	-	4.9	4.6	0.573	0.855
1	4938753	4941332	AT1G14440	-	14.5	-3.5	0.388	0.745
1	4946191	4947670	AT1G14450	-	4	1.3	0.353	0.719
1	4961593	4964515	AT1G14510	-	11.1	-0.9	0.286	0.661
1	4968133	4970311	AT1G14520	-	28.7	-24.4	0.692	0.908
1	4970857	4973726	AT1G14530	-	9.3	-9.3	0.0419	0.407
1	4980623	4983367	AT1G14560	+	34.3	-34.1	0.108	0.516
1	4983488	4987375	AT1G14570	+	4.3	2	0.363	0.725
1	4989561	4992805	AT1G14580	+	68.8	-68.4	0.491	0.814
1	4998766	5000710	AT1G14590	-	5.8	5.2	0.523	0.83
1	5008152	5014533	AT1G14610	-	37.4	34.3	0.0161	0.289
1	5014674	5016708	AT1G14620	-	7	-6.6	0.0155	0.283
1	5019799	5021653	AT1G14630	+	10.7	-10.6	0.116	0.524
1	5027315	5031883	AT1G14650	+	56.3	-49.8	0.108	0.516
1	5037575	5040597	AT1G14670	+	5.7	2.5	0.468	0.798
1	5042239	5045556	AT1G14685	+	86	69.5	0.396	0.75
1	5051655	5055299	AT1G14690	-	12.5	-10.4	0.141	0.547
1	5058582	5061140	AT1G14700	+	8.5	7.5	0.472	0.8
1	5061693	5065303	AT1G14710	-	14.9	-6.9	0.842	0.952
1	5066524	5068677	AT1G14720	-	3.8	0.1	0.78	0.937
1	5073030	5074798	AT1G14730	+	4.8	-0.5	0.945	0.978
1	5075178	5077981	AT1G14740	-	64.4	62.7	0.0829	0.485
1	5102423	5104850	AT1G14810	-	4.1	-2	0.499	0.818
1	5104974	5107107	AT1G14820	-	11	10.4	0.821	0.949
1	5107415	5111746	AT1G14830	-	10.3	7.2	0.339	0.707
1	5111700	5115514	AT1G14840	-	133.4	126.6	0.112	0.519
1	5116522	5123559	AT1G14850	-	10	-9.1	0.625	0.883
1	5128343	5129731	AT1G14870	-	3.7	-2.8	0.781	0.938
1	5136873	5137982	AT1G14890	+	4.1	-0.5	0.904	0.966
1	5138115	5139467	AT1G14900	-	3	1.3	0.791	0.94
1	5139711	5143735	AT1G14910	-	7.2	-6.5	0.605	0.871
1	5148981	5151415	AT1G14920	+	64.7	60.9	0.0801	0.482
1	5165488	5166939	AT1G14980	-	3.6	-1.2	0.0531	0.438
1	5166912	5168336	AT1G14990	-	8.6	3.8	0.815	0.947
1	5168595	5170066	AT1G15000	+	26.5	-26	0.282	0.658
1	5172231	5176479	AT1G15020	-	9.6	-3.9	0.759	0.93
1	5177479	5180049	AT1G15030	+	44.1	-40.7	0.351	0.717
1	5183257	5187106	AT1G15060	-	25.6	-1.9	0.689	0.907
1	5193283	5194214	AT1G15100	-	6.3	-1.4	0.546	0.841
1	5198939	5202315	AT1G15110	+	9.6	-2.6	0.64	0.887
1	5202592	5204494	AT1G15120	+	3.1	-2.5	0.0522	0.434
1	5206001	5209979	AT1G15130	-	16.4	16.3	0.0695	0.468
1	5210180	5212349	AT1G15140	-	6	5.1	0.55	0.844
1	5220402	5222973	AT1G15170	+	17.1	16.2	0.123	0.528
1	5222728	5224143	AT1G15175	-	42.9	38.3	0.729	0.919
1	5224293	5226778	AT1G15180	+	6.6	-1.5	0.542	0.839
1	5228299	5231184	AT1G15200	-	50.7	-14.3	0.47	0.799
1	5240028	5241541	AT1G15220	-	5.9	1.6	0.928	0.972
1	5242072	5243262	AT1G15230	-	10.8	1	0.809	0.945
1	5243382	5248693	AT1G15240	+	42	-10.5	0.837	0.951
1	5248663	5249563	AT1G15250	-	46.1	45	0.136	0.543
1	5249759	5250573	AT1G15260	+	9.9	-7.7	0.0154	0.283
1	5250649	5252121	AT1G15270	-	1.6	0.4	0.792	0.94
1	5252284	5256863	AT1G15280	+	12.1	1	0.12	0.528
1	5256869	5265155	AT1G15290	-	62	27.8	0.19	0.581
1	5275615	5277869	AT1G15340	-	31.2	-22.6	0.189	0.579
1	5278026	5279988	AT1G15350	-	15.6	11.3	0.171	0.567
1	5286865	5288640	AT1G15370	+	5.6	2.2	0.137	0.544
1	5290581	5292582	AT1G15380	+	4	1.6	0.819	0.948
1	5294628	5295931	AT1G15390	+	2.6	-0.8	0.891	0.963
1	5295755	5297075	AT1G15400	-	29.7	-28.1	0.00784	0.218
1	5297846	5298571	AT1G05163	-	5.1	2.5	0.414	0.764
1	5297874	5298166	AT1G15405	-	3.7	0.7	0.621	0.88
1	5298323	5300927	AT1G15410	+	78	-66.4	0.971	0.986
1	5301515	5303522	AT1G15420	-	2.8	0.1	0.597	0.866
1	5304097	5306087	AT1G15430	+	7.2	-6	0.695	0.911
1	5306026	5309558	AT1G15440	-	23	-20.6	0.0613	0.457
1	5315498	5317941	AT1G15470	+	2.5	0	0.986	0.992
1	5317972	5320630	AT1G15480	+	29.9	27.8	0.226	0.609
1	5326289	5328875	AT1G15500	+	8.6	3.4	0.847	0.953
1	5329063	5331711	AT1G15510	+	13.3	12.6	0.0865	0.489
1	5361864	5365559	AT1G15570	+	11.7	-8.1	0.431	0.775
1	5381031	5385380	AT1G15660	+	29.2	11.5	0.554	0.847
1	5389951	5391672	AT1G15670	+	12.9	-6.6	0.415	0.764
1	5398925	5402733	AT1G15690	+	7.4	1.2	0.0222	0.327
1	5402568	5403818	AT1G15700	-	3.6	3	0.322	0.693
1	5404129	5405910	AT1G15710	+	17.8	-9.2	0.238	0.624
1	5407400	5410043	AT1G15730	-	39.5	-14.8	0.0527	0.436
1	5410907	5414919	AT1G15740	+	17.5	-13.9	0.79	0.94
1	5414816	5421033	AT1G15750	-	44.8	38	0.646	0.89
1	5430039	5436618	AT1G15780	-	18.4	-18.3	0.0443	0.412
1	5444219	5446564	AT1G15810	+	11.8	4.1	0.821	0.949
1	5446461	5447880	AT1G15820	-	3.4	3.3	0.0768	0.479
1	5454765	5457022	AT1G15860	+	9.4	7	0.083	0.485
1	5458397	5460359	AT1G15880	-	13.1	-12.6	0.0966	0.503
1	5460476	5461297	AT1G15885	+	13.7	-13.7	0.0462	0.416
1	5465250	5469180	AT1G15910	+	51.8	48.2	0.165	0.564
1	5469254	5471149	AT1G15920	+	7.8	-5.1	0.867	0.958
1	5471315	5473048	AT1G15930	+	5.1	-3.2	0.314	0.687
1	5478702	5482180	AT1G15950	+	6.7	-5.5	0.426	0.771
1	5486272	5489132	AT1G15970	-	21.2	-20.1	0.0128	0.26
1	5489144	5491363	AT1G15980	+	12.2	8.4	0.727	0.919
1	5494532	5495359	AT1G16000	+	7.4	6.5	0.212	0.601
1	5495372	5497723	AT1G16010	-	5.9	-0.7	0.835	0.951
1	5498011	5501358	AT1G16020	+	9.9	-6.9	0.792	0.94
1	5504607	5507059	AT1G16040	+	4.8	-2.1	0.218	0.604
1	5514261	5516027	AT1G16080	+	16.7	1.5	0.173	0.567
1	5538665	5540002	AT1G16170	-	66.3	61.9	0.0766	0.479
1	5540049	5542902	AT1G16180	+	6.2	6	0.0452	0.415
1	5543118	5546103	AT1G16190	+	8.1	-4.1	0.614	0.876
1	5546098	5547753	AT1G16210	-	30.5	-19.4	0.758	0.929
1	5554842	5556844	AT1G16240	-	9.2	6.2	0.0409	0.406
1	5556963	5559520	AT1G16250	+	23.3	-14.8	0.695	0.911
1	5559497	5562192	AT1G16260	-	43.3	-41.9	0.168	0.565
1	5567741	5570679	AT1G16280	-	8.3	7.6	0.342	0.71
1	5578264	5580730	AT1G16310	+	9.9	9.9	0.419	0.766
1	5580820	5582154	AT1G16320	+	4.6	-3.8	0.0477	0.419
1	5590755	5593098	AT1G16350	+	8.2	-4.4	0.728	0.919
1	5602785	5604770	AT1G16390	+	26.9	25.1	0.0776	0.479
1	5605043	5607498	AT1G16400	+	85.8	-42.3	0.338	0.707
1	5608681	5612064	AT1G16410	+	7.9	-1	0.759	0.93
1	5619544	5622674	AT1G16460	-	8.8	4.9	0.701	0.912
1	5622745	5625683	AT1G16470	+	7.7	7.4	0.131	0.536
1	5648635	5651167	AT1G16520	+	7.7	-4.9	0.891	0.963
1	5668383	5670708	AT1G16560	+	9.7	-6.9	0.781	0.938
1	5670576	5673600	AT1G16570	-	88.8	-81.5	0.0178	0.3
1	5675494	5678873	AT1G16610	-	7	0.5	0.841	0.952
1	5697215	5699870	AT1G16670	+	10.4	7.1	0.552	0.846
1	5702152	5705892	AT1G16680	+	44.2	-36.3	0.722	0.918
1	5709623	5712043	AT1G16700	+	10.5	-0.1	0.025	0.342
1	5713793	5722614	AT1G16710	+	204.3	195.9	0.158	0.559
1	5722890	5726478	AT1G16720	+	8.7	-0.1	0.0793	0.482
1	5726367	5727406	AT1G16730	-	9.4	-8.3	0.0658	0.464
1	5727621	5729115	AT1G16740	+	3	-1	0.566	0.852
1	5729056	5731934	AT1G16750	-	27.3	-17.8	0.197	0.588
1	5744334	5745259	AT1G16790	+	3.8	-3.7	0.49	0.813
1	5755587	5756895	AT1G16810	+	2.7	1.4	0.414	0.764
1	5758381	5758575	AT1G05273	+	9.9	-9	0.763	0.932
1	5758854	5760509	AT1G16825	+	15.7	-11.5	0.547	0.843
1	5762693	5764184	AT1G16840	-	6.1	-5.6	0.394	0.749
1	5767299	5770602	AT1G16860	+	21.1	8.1	0.0995	0.509
1	5770731	5773322	AT1G16870	-	15.3	10.1	0.317	0.688
1	5773511	5776308	AT1G16880	+	17.7	16.2	0.143	0.548
1	5776176	5778529	AT1G16890	-	5.2	-1.9	0.185	0.578
1	5779007	5782433	AT1G16900	-	8.5	-4.4	0.614	0.876
1	5786556	5787329	AT1G16916	-	146.6	135.8	0.0858	0.488
1	5787149	5789312	AT1G16920	-	8.1	-6	0.8	0.942
1	5799740	5800887	AT1G16960	+	9	7.3	0.48	0.806
1	5800766	5805811	AT1G16970	-	12.7	4.3	0.297	0.673
1	5820079	5822013	AT1G17020	+	9.8	5	0.674	0.9
1	5828914	5831383	AT1G17050	+	4.1	0.3	0.708	0.913
1	5840268	5841745	AT1G17080	-	20.9	-9.8	0.274	0.652
1	5844645	5845661	AT1G17100	+	11.1	-6.7	0.00125	0.085
1	5845674	5850934	AT1G17110	-	163.8	160.7	0.144	0.549
1	5851859	5853987	AT1G17120	+	11.1	1.2	0.245	0.629
1	5854092	5856697	AT1G17130	+	6.8	-4.5	0.0138	0.269
1	5856572	5858550	AT1G17140	-	18.7	18.7	0.562	0.85
1	5860077	5862890	AT1G17145	-	4.9	-0.8	0.788	0.94
1	5867534	5869436	AT1G17160	+	13.2	10	0.333	0.703
1	5869542	5870883	AT1G17170	+	54.3	53.9	0.0881	0.49
1	5875294	5876620	AT1G17190	+	90.7	-88.4	0.343	0.71
1	5878389	5880073	AT1G17200	+	2.9	2.7	0.258	0.638
1	5879995	5884773	AT1G17210	-	13	-1.7	0.0853	0.487
1	5885006	5890500	AT1G17220	+	7.4	-3.1	0.549	0.844
1	5909164	5911708	AT1G17270	-	75.1	-66.7	0.239	0.624
1	5916831	5920342	AT1G17280	-	16.3	-3.2	0.081	0.483
1	5922331	5926400	AT1G17290	+	11.3	6.1	0.0103	0.239
1	5929825	5931926	AT1G17330	+	14.8	4.5	0.651	0.892
1	5933779	5938817	AT1G17340	+	8.5	5.1	0.702	0.912
1	5941548	5944465	AT1G17350	+	8.3	7	0.26	0.64
1	5946447	5951561	AT1G17360	+	4.3	4.2	0.464	0.796
1	5951541	5955143	AT1G17370	-	33.4	-23.8	0.7	0.912
1	5968409	5969995	AT1G17410	-	20.6	15.2	0.51	0.824
1	5977322	5981521	AT1G17420	+	303.1	299.9	0.0635	0.461
1	5983983	5987934	AT1G17440	-	36.4	-36.2	0.0376	0.395
1	5997056	5998599	AT1G17455	+	5.7	-5.6	0.204	0.593
1	6002887	6006410	AT1G17470	+	13.1	8.2	0.127	0.531
1	6008436	6009420	AT1G17490	+	2.8	0.3	0.725	0.919
1	6017807	6023503	AT1G17500	+	32.1	-32.1	0.0268	0.353
1	6023503	6024309	AT1G17510	-	10.3	9.7	0.163	0.561
1	6024635	6027565	AT1G17520	-	16.7	-1.4	0.894	0.963
1	6027486	6029115	AT1G17530	+	13.9	13.3	0.518	0.828
1	6034269	6037398	AT1G17550	+	26.6	-15.6	0.0149	0.281
1	6037404	6038698	AT1G17560	-	7.9	2.8	0.49	0.813
1	6039249	6049685	AT1G17580	+	20.1	-17	0.262	0.64
1	6061894	6063362	AT1G17620	+	5.9	5.2	0.516	0.827
1	6069423	6072140	AT1G17650	-	12.7	5.6	0.521	0.829
1	6076070	6082395	AT1G17680	+	16.8	-6.9	0.712	0.915
1	6082721	6088381	AT1G17690	-	20.7	6.5	0.868	0.958
1	6093184	6098443	AT1G17720	-	74.8	41	0.334	0.703
1	6099038	6100397	AT1G17730	+	5.3	-3.7	0.419	0.766
1	6100963	6105347	AT1G17745	+	20.2	12.8	0.112	0.519
1	6110106	6116617	AT1G17760	-	20.6	4.3	0.873	0.958
1	6123566	6125339	AT1G17780	+	2.6	0.4	0.818	0.948
1	6130024	6131627	AT1G17810	+	8.5	-5	0.698	0.911
1	6142401	6146521	AT1G17840	+	8.6	-2.5	0.499	0.818
1	6145925	6148940	AT1G17850	-	7.2	-6.3	0.689	0.907
1	6149300	6150038	AT1G17860	+	2.2	1.4	0.259	0.638
1	6149304	6150189	AT1G05347	-	8.9	4.2	0.89	0.962
1	6149938	6152222	AT1G17870	-	11.7	-5.7	0.395	0.75
1	6152383	6153982	AT1G17880	-	8.6	-3.4	0.339	0.707
1	6154263	6155804	AT1G17890	-	5.3	5.3	0.169	0.566
1	6184716	6187499	AT1G17970	+	17.9	10.8	0.872	0.958
1	6187464	6191708	AT1G17980	-	120.6	118.2	0.145	0.549
1	6192032	6194093	AT1G17990	-	19.7	15.9	0.969	0.985
1	6194425	6196343	AT1G18000	-	24.5	-24.2	0.232	0.616
1	6199689	6201759	AT1G18010	+	24.5	-24.2	0.262	0.641
1	6202234	6204234	AT1G18020	+	35.8	32.9	0.138	0.545
1	6204258	6206988	AT1G18030	+	4.7	-4.1	0.772	0.935
1	6206870	6209528	AT1G18040	-	6.2	-6.2	0.0232	0.333
1	6211831	6213591	AT1G18060	-	2.4	0.3	0.334	0.703
1	6213650	6218384	AT1G18070	-	11.2	7.9	0.437	0.776
1	6222200	6224242	AT1G18080	+	24.6	-6.3	3.21e-05	0.00762
1	6244297	6247830	AT1G18150	-	8.7	0.1	0.653	0.893
1	6248618	6254080	AT1G18160	+	24.2	-3.8	0.0302	0.369
1	6254093	6255734	AT1G18170	+	16.7	-16.7	0.0657	0.464
1	6257850	6261501	AT1G18190	-	6.8	-2.4	0.849	0.954
1	6266608	6268939	AT1G18210	-	8.8	-1.6	0.946	0.978
1	6276776	6278258	AT1G18250	-	2.8	2.1	0.991	0.995
1	6278787	6282144	AT1G18260	-	23.7	22.7	0.131	0.536
1	6283369	6293993	AT1G18270	-	48.7	-42.6	0.818	0.948
1	6299668	6301139	AT1G18300	+	4.5	0.1	0.588	0.861
1	6304359	6305689	AT1G18320	+	28	-27.2	0.00847	0.224
1	6305813	6308243	AT1G18330	-	5.4	-3.7	0.951	0.98
1	6311442	6313931	AT1G18340	-	82.8	55.1	0.496	0.816
1	6316694	6319427	AT1G18360	-	41.5	39.7	0.372	0.732
1	6331397	6333856	AT1G18400	+	15.5	14.8	0.943	0.978
1	6345973	6347918	AT1G18440	+	5.8	0.6	0.93	0.972
1	6348047	6352010	AT1G18450	+	21.4	-17.5	0.777	0.937
1	6352324	6356113	AT1G18460	+	16.2	8.2	0.184	0.576
1	6355694	6360344	AT1G18470	-	4.1	-2.1	0.679	0.902
1	6361585	6363061	AT1G18480	+	5.5	-2.8	0.445	0.781
1	6363041	6366263	AT1G18485	+	61	50.5	0.173	0.567
1	6366519	6368879	AT1G18490	+	4.3	2.4	0.374	0.734
1	6368965	6373080	AT1G18500	+	25.5	25.5	0.085	0.486
1	6376638	6378580	AT1G18540	-	15.6	-10.7	0.056	0.448
1	6389398	6391386	AT1G18570	+	17.1	13.8	0.477	0.805
1	6395768	6398274	AT1G18580	+	67.9	-67.9	0.102	0.512
1	6398530	6400029	AT1G18590	+	79.6	79.6	0.29	0.666
1	6400281	6402794	AT1G18600	+	95.4	94.5	0.0906	0.493
1	6405606	6409532	AT1G18610	+	127.3	115.4	0.631	0.885
1	6409654	6414569	AT1G18620	+	17.8	15.2	0.166	0.564
1	6414608	6416459	AT1G18630	+	17	15.4	0.503	0.82
1	6416168	6418693	AT1G18640	-	9.6	3.9	0.0931	0.497
1	6418837	6421188	AT1G18650	-	3.8	3.8	0.472	0.8
1	6420855	6425898	AT1G18660	+	28.8	-28.8	0.187	0.578
1	6426708	6431093	AT1G18670	-	21.8	9.3	0.824	0.949
1	6431937	6433552	AT1G18680	-	4.9	3.4	0.344	0.711
1	6433516	6437236	AT1G18690	+	80.3	-77	0.648	0.891
1	6437473	6444076	AT1G18700	+	64.7	-41.1	0.582	0.858
1	6450584	6453263	AT1G18710	+	23	-6.9	0.762	0.932
1	6457774	6460405	AT1G18720	-	21.8	-21.3	0.0864	0.489
1	6460402	6462344	AT1G18730	+	14	1.2	0.00586	0.191
1	6463921	6465476	AT1G18740	+	5	-1.4	0.737	0.922
1	6465486	6466454	AT1G18745	-	35.5	-3.1	0.0782	0.48
1	6466666	6469984	AT1G18750	+	2.1	0.5	0.905	0.966
1	6474801	6475979	AT1G18773	+	12.6	11.7	0.693	0.909
1	6481112	6483646	AT1G18800	-	47.3	-47.3	0.0513	0.43
1	6485514	6487153	AT1G18810	-	8.6	0.5	0.223	0.607
1	6500802	6504567	AT1G18840	-	7.3	1.1	0.304	0.677
1	6504676	6506542	AT1G18850	-	6.6	3.9	0.395	0.75
1	6520720	6523368	AT1G18880	+	10.1	-7.6	0.334	0.703
1	6522763	6526075	AT1G18890	-	20	-13.6	0.679	0.902
1	6528983	6532697	AT1G18900	+	12.8	1.2	0.0662	0.465
1	6546176	6552108	AT1G18950	+	7.6	6.3	0.587	0.861
1	6557180	6558115	AT1G18980	-	15.3	15	0.0805	0.482
1	6560490	6562791	AT1G19000	-	5.6	4.6	0.149	0.552
1	6568001	6568705	AT1G19020	+	7.8	-3.6	0.542	0.839
1	6577832	6579314	AT1G19050	-	8.9	-5.2	0.629	0.884
1	6584240	6586517	AT1G19080	+	21.4	18.8	0.148	0.551
1	6602104	6606028	AT1G19110	+	26.4	-26.4	0.452	0.786
1	6608114	6609369	AT1G19120	+	116.9	116.6	0.0889	0.492
1	6609324	6610613	AT1G19130	-	8	8	0.0304	0.371
1	6610651	6612609	AT1G19140	-	22.8	-5.4	0.139	0.546
1	6612629	6613972	AT1G19150	+	7.9	1.7	0.000671	0.0579
1	6616601	6619006	AT1G19170	+	2.9	2	0.893	0.963
1	6621776	6623668	AT1G19180	+	14.9	-11.3	0.297	0.673
1	6627682	6633133	AT1G19220	-	9.5	9.5	0.476	0.804
1	6649242	6650446	AT1G19240	-	5.3	-0.8	0.712	0.915
1	6662416	6666032	AT1G19270	+	6.3	3.2	0.381	0.739
1	6671094	6672777	AT1G19300	-	12	-2.6	0.242	0.626
1	6676209	6677680	AT1G19310	-	7.5	7.1	0.185	0.578
1	6680422	6683559	AT1G19330	-	26.7	19.1	0.705	0.913
1	6688462	6691216	AT1G19350	+	5.5	-0.2	0.0306	0.371
1	6690398	6692566	AT1G19360	-	7.4	0.9	0.378	0.737
1	6697873	6698858	AT1G19380	+	6.9	-5	0.478	0.805
1	6709888	6710670	AT1G19394	+	295.8	285.7	0.0885	0.491
1	6709777	6711788	AT1G19396	+	183.7	172.8	0.0506	0.428
1	6710850	6711787	AT1G19397	+	14.2	0	0.297	0.673
1	6712021	6714483	AT1G19400	-	26.2	-6.6	0.345	0.712
1	6724412	6728075	AT1G19430	-	10.1	-5.9	0.804	0.943
1	6728746	6730931	AT1G19440	+	21.8	3.8	0.347	0.714
1	6731410	6735024	AT1G19450	-	11.8	3.9	0.107	0.515
1	6746777	6751609	AT1G19485	+	44.6	35.7	0.978	0.988
1	6759858	6762847	AT1G19520	+	22.3	-21.6	0.495	0.815
1	6763764	6765049	AT1G19530	+	3.1	1	0.94	0.977
1	6773301	6774523	AT1G19570	-	16.9	-15	0.0637	0.461
1	6774682	6777568	AT1G19580	+	7.8	5.5	0.29	0.666
1	6778886	6781222	AT1G19600	+	4.5	2.9	0.94	0.977
1	6796136	6799764	AT1G19650	-	25.3	-23	0.414	0.764
1	6799968	6802906	AT1G19660	-	26.4	22.2	0.123	0.528
1	6803485	6805092	AT1G19670	-	8.5	6.8	0.497	0.817
1	6805429	6807862	AT1G19680	+	152.4	-152	0.169	0.566
1	6807714	6809642	AT1G19690	-	8	5.7	0.73	0.919
1	6809584	6813063	AT1G19700	-	17.9	17.5	0.00587	0.191
1	6814703	6816876	AT1G19710	+	40.1	11.5	0.0975	0.505
1	6816701	6819542	AT1G19715	-	10.2	9.3	0.152	0.552
1	6819563	6822711	AT1G19720	-	76.6	68.1	0.648	0.891
1	6822846	6824071	AT1G19730	-	11.3	-2.8	0.501	0.819
1	6824321	6825459	AT1G19740	+	16.9	-14.6	0.405	0.757
1	6832324	6833837	AT1G19770	+	3.2	-1.1	0.328	0.698
1	6846337	6848128	AT1G19800	+	2.8	0	0.994	0.997
1	6855898	6860563	AT1G19835	-	15.5	13.6	0.13	0.536
1	6886668	6891404	AT1G19850	+	109.9	-109.8	0.118	0.525
1	6891381	6894752	AT1G19860	-	17.6	6.7	0.941	0.977
1	6895008	6898818	AT1G19870	-	5.4	5.2	0.415	0.764
1	6900336	6904155	AT1G19880	-	32.3	25.2	0.0588	0.451
1	6913000	6914634	AT1G19910	+	7.6	-5.7	3.14e-06	0.00163
1	6914517	6916823	AT1G19920	-	10.4	10.1	0.113	0.519
1	6927735	6928656	AT1G19960	+	7.7	5.5	0.471	0.8
1	6931011	6932826	AT1G19970	-	7.3	0.6	0.393	0.749
1	6935217	6936928	AT1G19990	+	32	26.8	0.31	0.684
1	6937718	6940832	AT1G20010	-	10.1	9.4	0.0276	0.355
1	6942624	6945091	AT1G20020	+	4.2	1.7	0.00982	0.235
1	6945424	6947344	AT1G20030	+	9.9	6	0.312	0.686
1	6949042	6950509	AT1G20050	+	4.5	0.9	0.556	0.848
1	6966841	6969009	AT1G20090	+	3.8	3.1	0.642	0.887
1	6969024	6971036	AT1G20100	-	9.9	5.2	0.628	0.883
1	6971423	6975130	AT1G20110	+	12.2	9.2	0.353	0.719
1	6986311	6987863	AT1G20140	+	3.9	3.5	0.448	0.782
1	6990641	6993989	AT1G20160	-	15.5	9.7	0.654	0.894
1	6998334	6999839	AT1G20190	-	9.1	-6.9	0.156	0.557
1	7001086	7004432	AT1G20200	-	6.9	3.7	0.0477	0.419
1	7004823	7007717	AT1G20220	-	48	-45.5	0.427	0.771
1	7007755	7009380	AT1G20225	-	23.5	22.8	0.54	0.838
1	7016598	7020690	AT1G20260	+	8.3	4.7	0.28	0.657
1	7020663	7023162	AT1G20270	-	14.4	13.8	0.551	0.846
1	7029628	7031535	AT1G20300	+	9.8	7.1	0.394	0.749
1	7038526	7040231	AT1G20330	-	5.5	-3	0.487	0.811
1	7042045	7043392	AT1G20340	-	3.6	1	0.00475	0.174
1	7051576	7053745	AT1G20370	-	6	4.6	0.515	0.826
1	7078803	7082566	AT1G20410	-	14	-7.2	0.78	0.937
1	7083011	7083910	AT1G20430	-	7.2	-3.1	0.149	0.552
1	7084408	7086873	AT1G20440	-	9.4	9	0.00706	0.207
1	7087902	7089606	AT1G20450	-	11.4	-7.2	0.729	0.919
1	7090940	7093442	AT1G20460	+	7.4	6.2	0.736	0.922
1	7094259	7094869	AT1G20470	+	3.8	0.4	0.889	0.962
1	7103361	7106121	AT1G20510	-	27.6	-6.5	0.0603	0.455
1	7112610	7115362	AT1G20540	+	17.6	16.3	0.279	0.657
1	7119670	7121871	AT1G20560	-	25	-24.5	0.0152	0.283
1	7126746	7128762	AT1G20575	-	8.1	8	0.214	0.602
1	7128866	7130799	AT1G20580	+	52.9	33.6	0.369	0.731
1	7142971	7146540	AT1G20620	+	7.3	2.7	0.0543	0.441
1	7146635	7150180	AT1G20630	+	17.3	-4	0.00451	0.172
1	7154409	7158287	AT1G20640	+	17.4	-8.6	0.127	0.531
1	7157825	7160590	AT1G20650	-	8.5	1.3	0.11	0.519
1	7164081	7168041	AT1G20670	-	8	0.6	0.931	0.973
1	7174335	7176647	AT1G20691	-	31.1	18.5	0.738	0.922
1	7176746	7178895	AT1G20693	+	5.3	-0.2	0.864	0.958
1	7179272	7181574	AT1G20696	+	16.4	-8.8	0.528	0.833
1	7209297	7214993	AT1G20760	+	12.7	12	0.904	0.966
1	7215009	7216897	AT1G20770	-	13.8	12.7	0.453	0.787
1	7231980	7233657	AT1G20810	+	4.6	3.1	0.635	0.885
1	7233653	7235128	AT1G20816	+	5.1	1.5	0.17	0.566
1	7238692	7239698	AT1G20823	+	9.7	6.1	0.282	0.658
1	7242895	7244978	AT1G20830	+	12.4	-7.3	0.205	0.594
1	7252110	7253747	AT1G20850	+	4.3	2.1	0.789	0.94
1	7262008	7265555	AT1G20880	-	11.5	-5.5	0.845	0.953
1	7265793	7267377	AT1G20890	-	12.9	8.6	0.804	0.943
1	7276942	7281236	AT1G20910	-	18	17.2	0.0284	0.36
1	7285041	7289943	AT1G20920	+	56.1	48.6	0.21	0.599
1	7297238	7301633	AT1G20950	-	8.4	5.9	0.601	0.869
1	7301598	7310271	AT1G20960	-	28.1	23.3	0.524	0.831
1	7313900	7319921	AT1G20970	+	12	10.6	0.75	0.927
1	7324470	7329441	AT1G20980	+	14.9	-4	0.8	0.943
1	7337604	7339452	AT1G21000	+	13.5	-10.6	0.00284	0.137
1	7346155	7347283	AT1G21010	+	10	-6.4	0.395	0.75
1	7366589	7368203	AT1G21050	+	4	-0.3	0.279	0.656
1	7371656	7374114	AT1G21060	+	59.5	9.5	0.414	0.764
1	7374114	7375789	AT1G21065	+	8.9	-8	0.254	0.635
1	7378537	7382661	AT1G21080	-	25.1	24.8	0.036	0.386
1	7386761	7388512	AT1G21100	-	8.5	8.3	0.0272	0.355
1	7398813	7400736	AT1G21130	-	12	11.9	0.59	0.862
1	7412829	7419643	AT1G21170	+	131.1	-125.7	0.489	0.812
1	7419663	7420957	AT1G21190	-	5	0.7	0.647	0.891
1	7444748	7448483	AT1G21270	+	36.1	-10.2	0.0631	0.461
1	7447489	7448483	AT1G21280	-	2.3	-0.3	0.924	0.971
1	7453244	7455009	AT1G21310	-	4.2	-1.4	0.686	0.906
1	7476901	7479258	AT1G21350	-	3.3	-0.9	0.32	0.691
1	7483780	7485666	AT1G21370	+	30.6	29.3	0.233	0.619
1	7485635	7488780	AT1G21380	-	5.4	4.4	0.239	0.624
1	7493212	7496741	AT1G21400	+	19.6	-8.8	0.00242	0.126
1	7496997	7499616	AT1G21410	+	41.5	-35.1	0.134	0.541
1	7502081	7504275	AT1G21440	-	7.8	4.4	0.437	0.776
1	7508700	7511801	AT1G21450	+	11	-4.2	0.16	0.56
1	7511749	7513481	AT1G21460	-	7.2	4.8	0.105	0.515
1	7518945	7521552	AT1G21480	-	5.9	4.8	0.12	0.528
1	7529704	7531108	AT1G21500	-	4.9	4.9	0.0204	0.316
1	7554670	7557112	AT1G21560	+	7.5	0.3	0.201	0.591
1	7557139	7565914	AT1G21580	-	154.8	145.8	0.393	0.749
1	7566228	7570014	AT1G21590	-	35.1	-31.6	0.00555	0.187
1	7570844	7573847	AT1G21600	-	6.7	4.1	0.314	0.687
1	7573829	7578963	AT1G21610	+	6.8	-2.3	0.634	0.885
1	7581007	7588153	AT1G21630	+	24.6	12.6	0.773	0.935
1	7588413	7592890	AT1G21640	+	31.2	19.6	0.0493	0.423
1	7592663	7604229	AT1G21650	-	764.9	-759.3	0.252	0.634
1	7605619	7609223	AT1G21660	+	6.5	0.1	0.244	0.628
1	7610240	7612721	AT1G21670	+	4.7	-4.1	0.7	0.912
1	7612833	7615374	AT1G21680	+	15.4	-12	0.757	0.929
1	7615504	7618628	AT1G21690	+	4.5	0.1	0.569	0.854
1	7620000	7624166	AT1G21700	-	18.5	17.7	0.825	0.95
1	7624319	7626138	AT1G21710	+	14.7	10.8	0.663	0.896
1	7626181	7628290	AT1G21720	+	10.8	-3.8	0.893	0.963
1	7630106	7636658	AT1G21730	+	104.3	96.2	0.234	0.619
1	7645609	7648855	AT1G21750	+	5	-0.3	0.699	0.911
1	7649193	7651816	AT1G21760	+	15.7	-10.6	0.026	0.349
1	7651645	7652288	AT1G21770	-	6.1	3	0.108	0.517
1	7651881	7654014	AT1G21780	+	13.4	-3.2	0.138	0.545
1	7654087	7655981	AT1G21790	+	5.5	-4.2	0.431	0.775
1	7660946	7662725	AT1G21830	-	22.1	-15.4	0.471	0.8
1	7666413	7667794	AT1G21840	+	11.4	1.9	0.858	0.958
1	7680389	7682641	AT1G21880	+	30.4	-28	0.961	0.982
1	7690801	7692459	AT1G21900	-	5.6	-2.4	0.745	0.925
1	7696426	7697831	AT1G21910	+	11.8	-9	0.452	0.786
1	7704172	7706254	AT1G21920	-	4.1	-2.9	0.899	0.964
1	7712818	7714459	AT1G21930	+	3.1	3	0.0697	0.469
1	7734660	7738772	AT1G21980	+	16.1	-12.4	0.159	0.559
1	7754280	7758029	AT1G22020	+	30.7	21.5	0.269	0.648
1	7767923	7770216	AT1G22040	+	20.5	17.7	0.426	0.771
1	7771658	7773154	AT1G22050	+	5.5	4.5	0.307	0.681
1	7773062	7781539	AT1G22060	-	12.9	10.2	0.815	0.947
1	7789132	7792139	AT1G22070	+	7.5	-2.1	0.088	0.49
1	7814662	7815722	AT1G22140	-	39.9	-33.4	0.892	0.963
1	7823065	7823971	AT1G22160	+	8.3	-1.2	0.105	0.515
1	7826267	7828326	AT1G22170	+	13.6	7.6	0.286	0.662
1	7835780	7837411	AT1G22190	+	20.7	0.9	0.17	0.566
1	7837562	7840898	AT1G22200	-	4.8	2.2	0.561	0.85
1	7858863	7859766	AT1G22250	+	6.6	-4	0.699	0.911
1	7865434	7866176	AT1G22270	+	3.8	-1.1	0.204	0.593
1	7873866	7876018	AT1G22280	+	21.2	8.2	0.309	0.683
1	7878758	7881395	AT1G22300	-	4.7	3	0.234	0.62
1	7886322	7889534	AT1G22330	+	73.3	67.3	0.248	0.631
1	7894806	7897761	AT1G22360	-	104.2	94.5	0.173	0.567
1	7903659	7906969	AT1G22400	-	125.9	118.5	0.46	0.793
1	7911842	7915004	AT1G22410	+	8.9	-7.4	0.79	0.94
1	7919076	7921893	AT1G22430	+	111.7	-107	0.00381	0.161
1	7925120	7927345	AT1G22450	+	45.4	-39.1	0.0509	0.428
1	7949475	7950900	AT1G22500	+	8.9	-8.7	0.327	0.697
1	7950817	7952832	AT1G22510	-	11.3	11.3	0.0418	0.407
1	7952973	7954546	AT1G22520	-	12.3	-9.1	0.88	0.961
1	7955444	7958564	AT1G22530	-	6.5	-5.2	0.0206	0.317
1	7966499	7968692	AT1G22550	-	61	60.9	0.00108	0.0783
1	7981721	7984334	AT1G22590	+	16.6	-13.6	0.577	0.856
1	7994165	8002989	AT1G22620	-	31.6	-30.4	0.882	0.961
1	7994261	7997588	AT1G22610	+	10.3	3.3	0.0668	0.466
1	8003222	8004304	AT1G22630	+	1.8	1.7	0.166	0.565
1	8006063	8007465	AT1G22640	+	8.2	-0.8	0.0263	0.35
1	8013352	8016150	AT1G22650	-	19.1	-7.3	0.27	0.649
1	8017280	8021930	AT1G22660	+	10	-0.1	0.88	0.961
1	8027125	8028168	AT1G22690	+	11.1	-9.2	0.767	0.934
1	8028157	8030136	AT1G22700	-	6.6	6.6	0.072	0.471
1	8030586	8033156	AT1G22710	-	7.6	6	0.136	0.543
1	8046072	8049039	AT1G22730	+	177.5	177.3	0.324	0.695
1	8049089	8050784	AT1G22740	+	12.3	10	0.836	0.951
1	8050769	8052930	AT1G22750	+	42.1	-41	0.492	0.814
1	8067863	8069356	AT1G22780	+	9.2	6.3	0.659	0.894
1	8069376	8071593	AT1G22790	+	9.5	2.8	0.921	0.97
1	8071788	8074357	AT1G22800	+	9.1	6.6	0.0479	0.42
1	8071788	8075020	AT1G05767	+	9.1	6.6	0.041	0.407
1	8079286	8080574	AT1G22840	+	4.2	4.2	0.0225	0.329
1	8080481	8082882	AT1G22850	-	11.8	11.6	0.00523	0.18
1	8083183	8089273	AT1G22860	+	19.8	-19.2	0.0061	0.195
1	8089266	8094505	AT1G22870	+	122.4	117.6	0.177	0.571
1	8101423	8102500	AT1G22885	+	5.3	3	0.358	0.722
1	8102727	8103588	AT1G22890	+	3.9	2.7	0.05	0.426
1	8104992	8108361	AT1G22910	+	103.4	95.5	0.22	0.606
1	8109573	8112061	AT1G22920	-	20.9	14.8	0.102	0.513
1	8117285	8122151	AT1G22930	+	39.6	38.5	0.0211	0.322
1	8122338	8125068	AT1G22940	+	168.8	166.9	0.151	0.552
1	8125022	8127286	AT1G22950	-	20.9	-14.9	0.444	0.781
1	8130597	8132435	AT1G22970	-	6.7	1.5	0.65	0.892
1	8143226	8145174	AT1G23000	+	10.8	9.4	0.628	0.883
1	8149867	8153796	AT1G23020	-	35.9	15	0.685	0.905
1	8156503	8159185	AT1G23030	+	20.2	19.4	0.00113	0.0795
1	8164781	8166716	AT1G23040	+	7.3	2.6	0.68	0.903
1	8168442	8169267	AT1G23050	+	5.9	5.7	0.467	0.797
1	8168442	8169267	AT1G23052	-	8.7	5.1	0.592	0.863
1	8180188	8183650	AT1G23080	-	10.6	0.1	0.727	0.919
1	8184924	8189234	AT1G23090	-	14.2	-14.2	0.315	0.688
1	8195775	8196475	AT1G23100	+	4.8	4.6	0.0621	0.459
1	8198585	8199616	AT1G23120	+	9.3	-8.9	0.163	0.561
1	8200320	8201246	AT1G23130	+	3.1	0.4	0.264	0.642
1	8215720	8219641	AT1G23180	+	40.8	40.6	0.703	0.913
1	8219807	8224547	AT1G23190	+	8.1	6.3	0.383	0.74
1	8233952	8235019	AT1G23205	-	11.5	-9.6	0.261	0.64
1	8242368	8244403	AT1G23220	+	17	15.7	0.113	0.519
1	8244417	8251937	AT1G23230	+	14.8	14.4	0.259	0.638
1	8256853	8258725	AT1G23260	-	3.2	2.6	0.919	0.97
1	8260607	8262795	AT1G23280	-	13.7	-13.6	0.844	0.953
1	8262924	8263739	AT1G23290	+	5.3	5.1	0.0082	0.221
1	8268384	8272021	AT1G23310	-	6.6	5.4	0.00658	0.2
1	8279553	8282421	AT1G23330	-	18.7	-7	0.0371	0.394
1	8283895	8286969	AT1G23340	-	15.1	-14.4	0.325	0.696
1	8295077	8296941	AT1G23360	-	10.7	7.1	0.802	0.943
1	8297240	8302651	AT1G23380	-	145.5	144.7	0.232	0.617
1	8308964	8310916	AT1G23390	-	6.5	-1.6	0.632	0.885
1	8311983	8315876	AT1G23400	-	57.2	56.4	0.89	0.962
1	8321610	8324497	AT1G23440	+	25.7	6.6	0.0807	0.482
1	8326746	8329782	AT1G23460	+	15.5	-7.7	0.0996	0.509
1	8332861	8336414	AT1G23480	+	26	22.6	0.445	0.781
1	8336592	8338827	AT1G23490	+	17.5	14.2	0.0389	0.399
1	8385187	8386522	AT1G23710	+	152.8	-152.1	0.265	0.644
1	8398114	8399836	AT1G23740	-	10.4	-6	0.494	0.815
1	8400055	8401550	AT1G23750	+	6.4	2.3	0.374	0.734
1	8406662	8408530	AT1G23780	-	22.2	-3.2	0.0172	0.296
1	8412050	8414886	AT1G23800	-	6.3	-2.1	0.721	0.917
1	8420264	8422985	AT1G23820	+	6.8	-1.3	0.389	0.745
1	8427256	8429498	AT1G23860	-	30.5	-20.2	0.0379	0.395
1	8432178	8435656	AT1G23870	+	70.7	-38.8	0.077	0.479
1	8435656	8438811	AT1G23880	+	143.7	142.9	0.539	0.838
1	8438765	8440866	AT1G23890	-	34.3	-21	0.697	0.911
1	8441072	8447681	AT1G23900	+	4.3	1.9	0.675	0.901
1	8469532	8471417	AT1G23950	-	10.9	7.8	0.0911	0.495
1	8478390	8480356	AT1G23960	-	8.3	6.9	0.0811	0.483
1	8481996	8483875	AT1G23970	-	2.5	1.3	0.868	0.958
1	8500118	8502065	AT1G24020	-	71.6	-67.7	0.772	0.935
1	8503776	8506813	AT1G24040	-	160.7	-153.4	0.697	0.911
1	8506967	8508909	AT1G24050	+	5.5	2.8	0.259	0.638
1	8525333	8527087	AT1G24100	-	17	-11.4	0.406	0.757
1	8529063	8532262	AT1G24120	-	6.7	-2.2	0.89	0.962
1	8540837	8542053	AT1G24145	+	12	-10.1	0.177	0.571
1	8542211	8543545	AT1G24147	+	6.9	-3.5	0.447	0.781
1	8544247	8545590	AT1G24148	+	16.1	-14.7	0.8	0.943
1	8553312	8556750	AT1G24160	-	4.1	3.9	0.61	0.874
1	8557214	8559066	AT1G24170	-	14.1	-10.5	0.0333	0.381
1	8560419	8563502	AT1G24180	-	15.9	-2.7	0.486	0.81
1	8563509	8570580	AT1G24190	-	5.7	4.9	0.872	0.958
1	8586334	8588180	AT1G24240	+	16.6	10.5	0.757	0.929
1	8604021	8607484	AT1G24267	-	14.8	-0.9	0.183	0.576
1	8614362	8620664	AT1G24300	-	81.2	38	0.5	0.818
1	8624013	8626405	AT1G24310	+	5.4	3	0.932	0.973
1	8635186	8638986	AT1G24340	+	8.7	0.3	0.668	0.897
1	8638519	8640825	AT1G24350	-	6	-2.6	0.198	0.589
1	8640581	8643503	AT1G24360	+	42.7	-34.3	0.146	0.549
1	8651406	8653915	AT1G24400	-	27	19.3	0.707	0.913
1	8661837	8664007	AT1G24440	+	4.7	4.3	0.512	0.825
1	8664096	8665569	AT1G24450	+	9.3	-1.6	0.737	0.922
1	8665873	8672651	AT1G24460	+	16.9	13.5	0.754	0.929
1	8682194	8685271	AT1G24490	+	1.5	-0.5	0.982	0.99
1	8685270	8688247	AT1G24510	-	25.7	0.9	0.124	0.529
1	8693226	8694705	AT1G24530	+	20.6	-11.8	0.12	0.527
1	8702360	8705879	AT1G24560	+	26	20.1	0.179	0.573
1	8710846	8711578	AT1G24575	-	4.7	0.3	0.732	0.921
1	8712477	8713225	AT1G24577	-	7.8	4.6	0.504	0.821
1	8720650	8722825	AT1G24610	-	14.6	13.8	0.679	0.902
1	8725788	8727212	AT1G24625	-	4.2	3.1	0.584	0.859
1	8741835	8755604	AT1G24706	+	421	403.7	0.203	0.592
1	8759532	8763469	AT1G24764	-	20.1	-14.7	0.608	0.873
1	8767561	8769571	AT1G24793	+	18.7	3.1	0.699	0.911
1	8769510	8771553	AT1G24800	+	6.1	2.2	0.191	0.583
1	8771369	8773535	AT1G24807	-	104.4	-68.7	0.38	0.739
1	8775900	8778072	AT1G24880	+	35.1	23.3	0.00448	0.171
1	8784035	8785634	AT1G24881	+	15.3	-7.4	0.561	0.85
1	8785784	8787914	AT1G24909	-	104.4	-68.7	0.392	0.748
1	8804488	8806361	AT1G25054	+	12.1	10.5	0.458	0.791
1	8806606	8808156	AT1G25055	+	6.1	2.2	0.191	0.583
1	8808548	8810443	AT1G25083	-	104.4	-68.7	0.382	0.74
1	8812694	8815264	AT1G25098	+	35.2	31.3	0.00639	0.199
1	8818866	8820736	AT1G25145	+	12.1	10.5	0.445	0.781
1	8821007	8822843	AT1G25150	+	6.1	2.2	0.203	0.592
1	8822691	8824821	AT1G25155	-	104.4	-68.7	0.369	0.731
1	8826982	8829682	AT1G25175	+	34.4	22.6	0.00338	0.149
1	8833244	8835235	AT1G25210	+	18.7	3.3	0.658	0.894
1	8835385	8837007	AT1G25211	+	5.8	1.9	0.26	0.639
1	8836834	8839609	AT1G25220	-	23.9	-8.2	0.173	0.567
1	8840202	8842445	AT1G25230	-	4.8	3.1	0.873	0.958
1	8853533	8855874	AT1G25260	-	4.3	-2	0.854	0.956
1	8860526	8861522	AT1G25275	+	7	-4.3	0.737	0.922
1	8863767	8866894	AT1G25280	+	7.9	-5.2	0.23	0.614
1	8867023	8869289	AT1G25290	+	9.8	8.8	0.869	0.958
1	8889017	8894306	AT1G25350	-	10.6	7.8	0.887	0.962
1	8900109	8903428	AT1G25375	-	34.8	-12.9	0.172	0.567
1	8903404	8906455	AT1G25380	+	12.8	0	0.369	0.731
1	8906028	8909334	AT1G25390	-	99.5	-99	0.0573	0.449
1	8915914	8918267	AT1G25420	+	18.1	-17.7	0.109	0.518
1	8922415	8923879	AT1G25425	+	25.1	-24.6	0.215	0.602
1	8933715	8935544	AT1G25440	-	9.6	8.5	0.379	0.738
1	8938386	8940613	AT1G25450	-	5.6	-4.5	0.808	0.945
1	8944608	8946322	AT1G25470	-	16.6	4.8	0.641	0.887
1	8951161	8955160	AT1G25490	+	15.4	-10.5	0.349	0.716
1	8962086	8964564	AT1G25520	+	7.8	2.6	0.0397	0.401
1	8964543	8967562	AT1G25530	-	216.2	207.9	0.103	0.513
1	8969064	8974815	AT1G25540	-	25	13.7	0.932	0.973
1	8976325	8978305	AT1G25550	+	3	1.7	0.528	0.833
1	8981555	8983314	AT1G25560	-	9	-5.7	0.0219	0.327
1	8991707	8995617	AT1G25570	-	6.9	1.2	0.611	0.875
1	8996713	8999917	AT1G25580	-	14.7	14.4	0.263	0.641
1	9002284	9004762	AT1G25682	-	5.6	5	0.424	0.769
1	9020379	9022769	AT1G26090	+	29.2	10.6	0.143	0.549
1	9024340	9027955	AT1G26110	-	36.7	12.1	0.0275	0.355
1	9028375	9032327	AT1G26120	-	21.5	-16.6	0.59	0.862
1	9039627	9043855	AT1G26150	-	8.8	5.8	0.143	0.549
1	9044421	9047049	AT1G26160	-	37.5	-25.2	0.958	0.982
1	9047291	9054703	AT1G26170	-	49	-32.4	0.813	0.947
1	9054672	9056941	AT1G26180	+	20.6	-20.1	0.0627	0.46
1	9065954	9071468	AT1G26208	-	361.3	361.3	0.0487	0.421
1	9067038	9068207	AT1G26210	+	4.8	4.8	0.211	0.6
1	9071139	9071861	AT1G26220	+	10.8	-10.8	0.00693	0.206
1	9072255	9075350	AT1G26230	-	15.9	-5.6	0.727	0.919
1	9089468	9092560	AT1G26270	-	24.3	-0.5	0.427	0.771
1	9095767	9099766	AT1G26300	-	75.4	-57.7	0.172	0.567
1	9113863	9114977	AT1G26340	+	8.8	-7.7	0.125	0.53
1	9121442	9125578	AT1G26370	-	33.3	-33.1	0.0532	0.438
1	9143936	9146106	AT1G26440	-	2.4	1.2	0.621	0.88
1	9148635	9150250	AT1G26450	-	34.7	34.6	0.0106	0.242
1	9151627	9154762	AT1G26460	+	11	4.9	0.562	0.85
1	9155090	9156370	AT1G26470	+	9.6	7.2	0.258	0.638
1	9171117	9173033	AT1G26550	+	17.9	-14.8	0.46	0.793
1	9178211	9181967	AT1G26560	+	13.1	10.2	0.0933	0.497
1	9182007	9184393	AT1G26570	+	5.7	5.3	0.37	0.731
1	9184566	9187578	AT1G26580	+	11.3	5.9	0.819	0.948
1	9195511	9199671	AT1G26620	-	6.2	1.4	0.788	0.939
1	9205799	9207417	AT1G26630	+	7.4	-5.6	0.0506	0.428
1	9207382	9209902	AT1G26640	-	8.9	6.2	0.206	0.594
1	9210050	9211588	AT1G26650	+	20.9	20.3	0.149	0.552
1	9214071	9215557	AT1G26665	+	4.5	4.3	0.671	0.899
1	9215769	9218010	AT1G26670	+	8.5	8.1	0.137	0.544
1	9224058	9225792	AT1G26690	-	3.7	2.9	0.373	0.734
1	9244980	9246652	AT1G26740	-	6.1	4.2	0.602	0.869
1	9246856	9248274	AT1G26750	+	8	7.4	0.354	0.719
1	9250040	9251659	AT1G26761	-	47.5	47	0.0275	0.355
1	9259431	9261313	AT1G26770	+	9.9	-5.7	0.222	0.607
1	9285024	9286395	AT1G26800	-	8	4.8	0.978	0.988
1	9295564	9298629	AT1G26830	+	9.8	9.8	0.00241	0.126
1	9300805	9304328	AT1G26850	-	11.2	9.4	0.645	0.89
1	9315304	9318277	AT1G26880	-	16	-10.6	0.0168	0.294
1	9316014	9316161	AT1G06033	-	1.6	1	0.815	0.947
1	9321649	9323028	AT1G26910	+	5.8	5.8	0.16	0.56
1	9329492	9330612	AT1G26920	+	21	-16.1	0.134	0.541
1	9343111	9345323	AT1G26940	+	2.4	1.1	0.947	0.978
1	9351159	9352833	AT1G26945	+	37.6	37.5	0.00471	0.174
1	9373884	9376828	AT1G27000	+	3	2.5	0.858	0.958
1	9381526	9384060	AT1G27030	+	16.9	8.3	0.926	0.971
1	9393652	9394716	AT1G27050	+	125.8	-124.2	0.829	0.95
1	9396657	9399500	AT1G27070	-	36.7	32.8	0.956	0.982
1	9403752	9406369	AT1G27090	-	31.3	22.7	0.0381	0.396
1	9407084	9411368	AT1G27100	-	13.8	-8.7	0.868	0.958
1	9421008	9424084	AT1G27120	+	42.2	-37.7	0.13	0.536
1	9425279	9426897	AT1G27130	+	4.6	-3.2	0.139	0.546
1	9429007	9432310	AT1G27150	+	11.3	-6.8	0.171	0.567
1	9446596	9449046	AT1G27190	-	17.9	16.7	0.0355	0.386
1	9449337	9451768	AT1G27200	-	19.4	-4.9	0.438	0.776
1	9455276	9458176	AT1G27210	-	11.4	7.5	0.407	0.758
1	9481404	9482992	AT1G27290	+	3.6	2.3	0.505	0.822
1	9483156	9484368	AT1G27300	+	2.6	2.1	0.9	0.964
1	9484315	9486002	AT1G27310	-	22.9	-15.9	0.64	0.887
1	9486888	9492632	AT1G27320	+	19.5	-16.2	0.817	0.948
1	9492848	9494382	AT1G27330	+	4.3	0.9	0.179	0.573
1	9495343	9498085	AT1G27340	+	10.4	10.4	0.00439	0.17
1	9497999	9499639	AT1G27350	-	51	49.8	0.105	0.515
1	9505111	9508542	AT1G27370	-	71.3	-69.8	0.198	0.589
1	9510474	9512971	AT1G27385	-	11.7	-11.6	0.112	0.519
1	9513080	9515050	AT1G27390	-	16.9	14.4	0.37	0.731
1	9515113	9517070	AT1G27400	+	8.4	-3.3	0.763	0.932
1	9520824	9527280	AT1G27430	-	27	-20.4	0.605	0.871
1	9527500	9528878	AT1G27435	-	14.5	-14	0.0132	0.266
1	9528966	9531489	AT1G27440	-	9.8	9.1	0.527	0.832
1	9531808	9534141	AT1G27450	+	7.3	7.3	0.0326	0.379
1	9534487	9537614	AT1G27460	+	8.1	8	0.435	0.775
1	9540048	9544303	AT1G27470	-	9.4	-3.7	0.327	0.698
1	9544409	9546285	AT1G27480	+	16.6	-14.1	0.228	0.612
1	9554709	9558461	AT1G27510	-	9.3	-5.6	0.819	0.948
1	9558561	9562485	AT1G27520	+	16.2	9.5	0.905	0.966
1	9562486	9564031	AT1G27530	-	37.3	-26.6	0.542	0.839
1	9565912	9567906	AT1G27540	-	38.6	-25.6	0.0809	0.483
1	9574549	9575189	AT1G27565	+	2.1	0.4	0.864	0.958
1	9592087	9602917	AT1G27595	+	432.8	427.4	0.383	0.741
1	9603550	9606247	AT1G27600	-	11.5	9.8	0.869	0.958
1	9611052	9614336	AT1G27630	+	65	-60.6	0.331	0.701
1	9614550	9616357	AT1G27650	+	20.2	12.3	0.461	0.793
1	9631189	9634597	AT1G27680	+	8.5	8.5	0.0432	0.409
1	9636587	9638901	AT1G27690	+	59.3	-53.6	0.107	0.515
1	9639023	9640204	AT1G27695	+	2.2	0.3	0.831	0.95
1	9639858	9641902	AT1G27700	-	12.2	-11.6	0.556	0.847
1	9648020	9649323	AT1G27730	-	7.9	-7.7	0.145	0.549
1	9657172	9661994	AT1G27750	+	102.4	101.1	0.275	0.652
1	9662020	9667550	AT1G27752	+	56.5	50.3	0.796	0.941
1	9668507	9671657	AT1G27760	+	7	4.6	0.717	0.917
1	9671631	9676307	AT1G27770	-	75.7	-71.3	0.319	0.691
1	9693007	9696546	AT1G27840	-	14.5	6.6	0.211	0.6
1	9698297	9703944	AT1G27850	+	48.1	-47.5	0.225	0.609
1	9715341	9720629	AT1G27900	-	40.9	27.1	0.628	0.883
1	9720732	9724800	AT1G27910	-	84.8	-84.4	0.487	0.811
1	9730958	9733000	AT1G27930	-	21.2	-15.8	0.48	0.806
1	9740507	9742159	AT1G27950	+	1.5	1.1	0.77	0.934
1	9746708	9748467	AT1G27970	+	2.3	0.7	0.684	0.905
1	9748505	9752769	AT1G27980	+	7.6	7.6	0.0434	0.41
1	9778850	9782907	AT1G28060	+	78.8	4.4	0.46	0.793
1	9795717	9799116	AT1G28090	+	20.1	19.8	0.231	0.616
1	9801081	9804394	AT1G28100	+	39	26.3	0.756	0.929
1	9803640	9806899	AT1G28110	-	30	-28.8	0.267	0.645
1	9812929	9815560	AT1G28120	-	5.3	3.8	0.382	0.74
1	9825168	9828118	AT1G28130	+	10.7	7.6	0.039	0.399
1	9831875	9834510	AT1G28140	-	33.9	-33.9	0.0581	0.451
1	9834641	9836210	AT1G28150	-	41	32.6	0.0674	0.466
1	9849843	9852449	AT1G28200	-	15.3	4.5	0.329	0.699
1	9862040	9864779	AT1G28230	-	6.5	-0.6	0.878	0.96
1	9868256	9872278	AT1G28240	-	20.3	15.4	0.763	0.932
1	9874246	9875579	AT1G28250	+	3.2	-1.4	0.916	0.969
1	9875526	9879433	AT1G28260	-	5.3	1.3	0.992	0.996
1	9885399	9887478	AT1G28280	-	16.1	13.6	0.199	0.59
1	9889100	9891015	AT1G28290	-	3.7	2.6	0.439	0.777
1	9912202	9913837	AT1G28310	-	36.5	11.1	0.611	0.875
1	9920218	9924488	AT1G28320	-	10.8	-1.2	0.908	0.967
1	9933785	9935440	AT1G28330	-	3.9	1.2	0.135	0.542
1	9939960	9943616	AT1G28340	+	6	-4.5	0.507	0.823
1	9943736	9949835	AT1G28350	+	289.9	-276.4	0.828	0.95
1	9963447	9966320	AT1G28380	+	9.3	-5.3	0.463	0.795
1	9969245	9971681	AT1G28395	-	21.4	21.4	0.31	0.684
1	9972184	9973942	AT1G28400	-	11.9	-10.7	0.0211	0.322
1	9976181	9979793	AT1G28410	-	24.9	24.9	0.171	0.567
1	9979477	9987737	AT1G28420	+	116.4	89.7	0.693	0.909
1	9996712	10000455	AT1G28440	+	10.2	-9.3	0.769	0.934
1	10015855	10018047	AT1G28490	+	40.7	32.5	0.117	0.525
1	10023816	10026311	AT1G28510	+	13.4	-5.5	0.29	0.666
1	10029082	10031990	AT1G28520	+	13.5	-2.3	0.52	0.829
1	10031984	10035638	AT1G28530	-	28	19.6	0.79	0.94
1	10035616	10037403	AT1G28540	+	2.3	1.3	0.971	0.986
1	10044336	10046552	AT1G28580	-	10.2	10	0.239	0.624
1	10050956	10053218	AT1G28600	-	17.4	-11.6	0.215	0.602
1	10053442	10055881	AT1G28610	-	51.1	-49.2	0.097	0.504
1	10071608	10073549	AT1G28660	-	147.1	-137.1	0.0668	0.466
1	10074358	10076457	AT1G28670	-	13.3	-4.9	0.188	0.578
1	10078188	10079909	AT1G28680	+	10	9.5	0.0644	0.463
1	10086365	10089772	AT1G28710	-	327.6	320.9	0.278	0.655
1	10109499	10111738	AT1G28960	-	40.7	-38.5	0.495	0.815
1	10133982	10136124	AT1G29040	+	28.1	26.2	0.333	0.703
1	10136245	10139228	AT1G29050	-	24.6	17.3	0.18	0.574
1	10147604	10149780	AT1G29060	+	35.9	-11.3	0.303	0.677
1	10149790	10151407	AT1G29070	+	15.1	-13.7	0.0871	0.489
1	10174161	10178521	AT1G29120	+	3.5	-1.5	0.887	0.962
1	10180301	10182808	AT1G29150	+	18.7	-13.6	0.845	0.953
1	10190136	10195213	AT1G29170	-	32	-4.8	0.0113	0.251
1	10210519	10212722	AT1G29220	-	50.5	-49.6	0.0785	0.481
1	10223265	10224799	AT1G29250	-	11.8	4.1	0.269	0.648
1	10224814	10226322	AT1G29260	+	6.1	3	0.698	0.911
1	10236336	10237990	AT1G29280	+	299.2	-258.4	0.85	0.955
1	10252240	10254792	AT1G29310	+	15.8	12.2	0.0408	0.406
1	10255249	10258343	AT1G29320	+	22.6	13.7	0.222	0.607
1	10258247	10261232	AT1G29330	-	15.7	11.6	0.186	0.578
1	10264042	10266917	AT1G29340	+	12.8	-9.5	0.698	0.911
1	10268420	10273821	AT1G29350	-	40.9	27.1	0.285	0.66
1	10273930	10275765	AT1G29357	-	25.4	-8.9	0.639	0.887
1	10277747	10283225	AT1G29370	-	32.3	-29.4	0.322	0.693
1	10286066	10288103	AT1G29390	-	7.1	5.7	0.429	0.773
1	10288128	10289666	AT1G29395	-	9.6	3.3	0.605	0.871
1	10289997	10294630	AT1G29400	-	7.8	7.7	0.718	0.917
1	10300350	10300453	AT1G06233	+	3.5	3.1	0.944	0.978
1	10300488	10300565	AT1G06237	+	12	11.9	0.2	0.591
1	10300877	10301302	AT1G29418	+	1.7	-0.1	0.573	0.855
1	10300881	10301021	AT1G06253	+	2.1	0.1	0.579	0.857
1	10301376	10302099	AT1G29420	-	4	2.6	0.931	0.973
1	10302584	10303418	AT1G29430	-	3.1	-1.1	0.763	0.932
1	10304506	10305108	AT1G29440	-	34.1	-30.8	0.218	0.605
1	10305552	10306595	AT1G29450	-	21.2	14.1	0.799	0.942
1	10307351	10308246	AT1G29460	-	6.1	1	0.889	0.962
1	10308519	10309896	AT1G29465	+	16.7	15.2	0.0472	0.418
1	10309264	10309404	AT1G06283	+	6.4	4.7	0.389	0.746
1	10310130	10314147	AT1G29470	-	26.7	-23.8	0.211	0.6
1	10321010	10321978	AT1G29500	+	2.5	1.5	0.304	0.678
1	10322422	10323239	AT1G29510	+	2	0.9	0.929	0.972
1	10323635	10324826	AT1G29520	+	1.7	1	0.831	0.95
1	10324744	10326848	AT1G29530	-	24.5	-5.1	0.212	0.601
1	10327137	10329116	AT1G29535	-	36.5	36	0.126	0.53
1	10371674	10374005	AT1G29660	+	6.9	5.9	0.0118	0.255
1	10375598	10377871	AT1G29670	+	5.6	-0.9	0.82	0.948
1	10379019	10382153	AT1G29690	-	111.2	76.7	0.77	0.934
1	10384944	10387441	AT1G29700	-	37.3	-34.4	0.198	0.589
1	10387513	10389286	AT1G29710	+	18	0.1	0.654	0.894
1	10422291	10424513	AT1G29760	+	25.3	19.8	0.0655	0.464
1	10426778	10429143	AT1G29785	-	106.1	104.6	0.225	0.609
1	10429717	10432123	AT1G29790	+	19.7	17.5	0.256	0.637
1	10432598	10435441	AT1G29800	+	30.9	29.8	0.11	0.519
1	10435373	10437558	AT1G29810	-	33.3	30.5	0.28	0.657
1	10437656	10440786	AT1G29820	+	8.9	5.3	0.82	0.949
1	10445618	10447753	AT1G29840	-	8.9	1.2	0.437	0.776
1	10447346	10449969	AT1G29850	+	6.4	-3.2	0.0842	0.485
1	10459456	10462967	AT1G29880	-	21.2	20.5	0.0221	0.327
1	10463028	10467452	AT1G29890	+	14.8	6.3	0.847	0.953
1	10467955	10472211	AT1G29900	+	30.8	1.2	0.332	0.702
1	10472279	10473502	AT1G29910	-	3.5	2.7	0.0117	0.255
1	10474655	10475969	AT1G29920	-	32.2	-25.5	4.66e-19	6.2e-15
1	10477884	10479114	AT1G29930	+	2.2	1.8	0.00544	0.186
1	10479006	10486824	AT1G29940	-	28.2	11.8	0.263	0.641
1	10491697	10494598	AT1G29950	+	13.3	-6.3	0.421	0.768
1	10498309	10499462	AT1G29965	-	9.2	5	0.236	0.621
1	10498350	10501498	AT1G29970	-	92.2	-87.4	0.137	0.544
1	10503238	10506189	AT1G29980	-	7.3	-6.8	0.247	0.631
1	10507532	10509151	AT1G29990	+	138.2	134.3	0.0153	0.283
1	10509155	10512558	AT1G30000	-	23.6	-21.6	0.111	0.519
1	10546510	10548236	AT1G30070	-	7.5	-5.4	0.252	0.633
1	10559495	10561545	AT1G30090	-	20.9	20.9	0.078	0.48
1	10581734	10584152	AT1G30110	+	12.3	9.1	0.499	0.818
1	10584104	10586680	AT1G30120	-	18	13.8	0.665	0.896
1	10587470	10590209	AT1G30130	+	77.9	71.4	0.396	0.75
1	10624999	10627135	AT1G30200	+	7.2	2.7	0.259	0.639
1	10627184	10630630	AT1G30210	-	37.3	-35.1	0.294	0.67
1	10638877	10640941	AT1G30230	+	5.9	-0.4	0.00533	0.182
1	10650913	10651829	AT1G30260	+	9.5	-6.5	0.267	0.646
1	10654799	10658924	AT1G30270	+	73.8	-69.2	0.0562	0.448
1	10672972	10675455	AT1G30300	+	13.8	-11.7	0.13	0.536
1	10685821	10690988	AT1G30330	-	4.5	2.2	0.942	0.977
1	10715481	10718997	AT1G30360	+	17	-12.7	0.663	0.895
1	10722182	10723247	AT1G30380	+	2.8	0.7	0.0837	0.485
1	10727316	10738092	AT1G30400	+	76.7	24	0.508	0.824
1	10738682	10747563	AT1G30410	+	79.5	78.9	0.0422	0.407
1	10758742	10762429	AT1G30440	+	24.7	-14.6	0.215	0.602
1	10762707	10769616	AT1G30450	+	60.5	38	0.365	0.728
1	10770812	10775428	AT1G30460	-	46.9	46.3	0.954	0.981
1	10779110	10786697	AT1G30470	+	69.6	55.7	0.249	0.632
1	10790021	10792725	AT1G30480	+	111.9	-96.8	0.247	0.631
1	10796123	10801093	AT1G30490	-	23.1	-16	0.811	0.946
1	10804449	10806428	AT1G30500	-	10.9	-10.8	0.118	0.525
1	10806929	10809188	AT1G30510	-	8.5	-5.7	0.478	0.805
1	10810396	10813779	AT1G30520	+	9.4	9.4	0.0374	0.395
1	10814611	10816615	AT1G30530	+	17.7	14.9	0.538	0.837
1	10816615	10819419	AT1G30540	-	10.7	9.5	0.0539	0.44
1	10828372	10831656	AT1G30570	+	9.9	8.6	0.877	0.959
1	10831672	10835635	AT1G30580	-	6.8	5.3	0.106	0.515
1	10835734	10840872	AT1G30590	-	53.5	50.8	0.25	0.632
1	10846512	10850724	AT1G30610	+	10.1	5.2	0.824	0.949
1	10858231	10860322	AT1G30630	-	18.6	-13.2	0.874	0.958
1	10860618	10865074	AT1G30640	+	8.2	-1.4	0.585	0.86
1	10881478	10886472	AT1G30680	+	85.5	61.4	0.24	0.625
1	10887606	10890407	AT1G30690	+	52.7	-47	0.632	0.885
1	10904774	10905724	AT1G30750	-	9.2	-7	0.465	0.796
1	10936764	10942292	AT1G30810	-	27.8	-24	0.921	0.97
1	10944907	10949482	AT1G30820	-	15.7	-9.9	0.0261	0.349
1	10960907	10963231	AT1G30825	+	9.3	1.7	0.605	0.871
1	10966906	10968878	AT1G30835	+	89.8	89	0.136	0.543
1	10979645	10980725	AT1G30845	+	19.8	-19.6	0.0868	0.489
1	10993001	10994152	AT1G30880	-	2.4	1	0.586	0.86
1	10994242	10996223	AT1G30890	+	7.4	2.2	0.385	0.743
1	11000861	11003226	AT1G30910	+	17.9	-0.1	0.25	0.632
1	11040249	11043773	AT1G30970	-	7.9	1.6	0.293	0.668
1	11057104	11059037	AT1G31020	+	5	-0.5	0.696	0.911
1	11084665	11088589	AT1G31070	+	3	-0.8	0.752	0.928
1	11104236	11108095	AT1G31120	-	140.3	-137.1	0.117	0.525
1	11114692	11116195	AT1G31130	-	8.1	5.2	0.0955	0.502
1	11119826	11122675	AT1G31150	+	36.9	31.1	0.89	0.962
1	11122603	11124220	AT1G31160	-	5.1	4	0.0939	0.499
1	11133409	11135189	AT1G31170	+	7.4	0.6	0.396	0.75
1	11142460	11144717	AT1G31180	-	8.4	-4.6	0.158	0.559
1	11144771	11146930	AT1G31190	+	22.7	22.6	0.0326	0.379
1	11156697	11158683	AT1G31220	+	16.6	-12.3	0.199	0.59
1	11158617	11163274	AT1G31230	-	4.5	-0.9	0.34	0.707
1	11171224	11171835	AT1G31258	+	3.2	2.3	0.929	0.972
1	11193624	11196397	AT1G31300	+	11.8	-10.9	0.0423	0.408
1	11214675	11216141	AT1G31330	-	3.9	1.1	0.000304	0.0334
1	11216809	11217546	AT1G31335	-	3.2	-1.4	0.935	0.974
1	11217694	11219618	AT1G31340	-	2.5	-0.4	0.993	0.996
1	11246816	11249587	AT1G31410	-	9.5	-6.2	0.617	0.878
1	11249599	11253915	AT1G31420	+	4.3	0	0.801	0.943
1	11255835	11258814	AT1G31440	-	9.9	-2.4	0.53	0.833
1	11261442	11263364	AT1G31460	-	189.5	-186.1	0.198	0.588
1	11273572	11276636	AT1G31500	-	30.6	-29.7	0.275	0.652
1	11288377	11293799	AT1G31540	-	322.5	-317.8	0.155	0.556
1	11295445	11297379	AT1G31550	-	21.4	20.8	0.093	0.497
1	11310996	11311989	AT1G31580	+	8.1	-7.9	0.539	0.837
1	11312960	11316582	AT1G31600	-	98.1	96.9	0.175	0.568
1	11326250	11330791	AT1G31650	-	51.6	26.1	0.423	0.769
1	11330923	11333540	AT1G31660	-	3.6	1.4	0.985	0.992
1	11349696	11355587	AT1G31710	+	45	-42.3	0.515	0.826
1	11359511	11364288	AT1G31730	+	7.5	-0.9	0.317	0.688
1	11372393	11374301	AT1G31760	-	9	-2.9	0.0888	0.492
1	11374759	11377885	AT1G31770	-	56.4	-45.4	0.194	0.585
1	11391198	11394748	AT1G31780	+	11	-3.5	0.85	0.955
1	11396401	11399714	AT1G31800	+	26.2	-17.4	0.395	0.75
1	11399606	11406809	AT1G31810	-	40.7	29.6	0.719	0.917
1	11410765	11412233	AT1G31812	-	4.1	1.5	0.00832	0.222
1	11414694	11416444	AT1G31817	-	5.8	-2.2	0.566	0.852
1	11416450	11418464	AT1G31820	-	53.1	-49.8	0.156	0.556
1	11418588	11420961	AT1G31830	-	28.8	0.9	0.725	0.919
1	11422635	11423684	AT1G31835	-	42.2	40.8	0.0754	0.477
1	11423316	11423487	AT1G06453	-	14.9	-4.4	0.821	0.949
1	11430099	11434115	AT1G31850	+	5.2	2.7	0.95	0.98
1	11434059	11436607	AT1G31860	-	53.4	50.6	0.31	0.684
1	11436718	11440275	AT1G31870	+	47.1	-0.3	0.0218	0.327
1	11456801	11463896	AT1G31910	+	12.8	5.1	0.869	0.958
1	11461854	11463857	AT1G31920	-	22.5	10.8	0.683	0.904
1	11464933	11469207	AT1G31930	+	48.5	-41.5	0.0618	0.459
1	11469481	11470010	AT1G31935	+	5.4	-5.4	0.494	0.815
1	11470055	11471481	AT1G31940	-	8.1	7.7	0.381	0.739
1	11479762	11482890	AT1G31970	+	10.8	6.9	0.00767	0.215
1	11528384	11531350	AT1G32050	+	9.9	2.7	0.0799	0.482
1	11532198	11534639	AT1G32060	+	7.7	-0.2	0.00435	0.169
1	11534606	11536437	AT1G32070	-	3.6	0	0.263	0.641
1	11537241	11539896	AT1G32080	-	5.1	-2.9	0.145	0.549
1	11539992	11544166	AT1G32090	-	14.1	5.8	0.395	0.75
1	11546159	11548016	AT1G32100	-	2.9	1.5	0.726	0.919
1	11558754	11561920	AT1G32130	-	12.6	6.7	0.673	0.899
1	11565493	11568645	AT1G32150	+	9.3	-9	0.262	0.641
1	11568653	11570438	AT1G32160	+	5.1	3.9	0.113	0.519
1	11575319	11578030	AT1G32170	+	153.2	-152.9	0.00616	0.196
1	11592926	11596056	AT1G32190	-	163.2	157	0.0123	0.255
1	11601670	11605174	AT1G32200	-	20.6	20	0.0347	0.384
1	11605605	11607866	AT1G32210	-	7	-2.7	0.285	0.661
1	11607853	11609968	AT1G32220	+	10.9	-8.5	0.852	0.956
1	11611890	11617419	AT1G32230	+	27.2	-16.4	0.0527	0.436
1	11640557	11641889	AT1G32260	-	12.5	12.3	0.578	0.856
1	11653499	11654833	AT1G32310	+	8.2	3.8	0.525	0.831
1	11663007	11666120	AT1G32340	-	11.1	6.3	0.778	0.937
1	11672765	11675387	AT1G32360	+	80.8	78.9	0.0281	0.357
1	11676924	11678692	AT1G32370	+	93.9	-93.9	0.00249	0.128
1	11681733	11684520	AT1G32380	+	53.1	53.1	0.00392	0.162
1	11689063	11691588	AT1G32400	-	5.2	2.9	0.0511	0.429
1	11693798	11695575	AT1G32410	+	2.3	0.2	0.823	0.949
1	11711943	11715162	AT1G32440	+	10.5	4	0.16	0.56
1	11715146	11719988	AT1G32450	-	17.4	-11.5	0.648	0.891
1	11738117	11739326	AT1G32460	+	3.9	0.2	0.0512	0.43
1	11739303	11740399	AT1G32470	-	7.7	3.8	0.371	0.732
1	11742005	11749788	AT1G32490	-	72.8	-59.3	0.538	0.837
1	11749797	11752190	AT1G32500	-	93.9	91.7	0.0682	0.467
1	11758210	11759324	AT1G32520	-	6.6	-5.8	0.274	0.652
1	11759426	11762635	AT1G32530	-	129.9	67.2	0.815	0.947
1	11767484	11770049	AT1G32540	+	18.9	7.4	0.852	0.956
1	11771620	11774294	AT1G32550	-	13.1	8.9	0.0484	0.42
1	11774483	11775442	AT1G32560	+	16.7	-14.8	0.204	0.593
1	11783542	11785704	AT1G32580	+	11.1	10.8	0.291	0.667
1	11785805	11788286	AT1G32583	+	19.8	17	0.959	0.982
1	11797329	11801359	AT1G32630	+	26.9	-26.3	0.816	0.947
1	11798118	11801407	AT1G32640	-	14.8	-8.7	0.00516	0.18
1	11820871	11821824	AT1G32690	-	8.6	1.2	0.636	0.885
1	11827358	11829933	AT1G32700	+	4.5	1.2	0.834	0.951
1	11840909	11843308	AT1G32730	+	6.2	-4.4	0.254	0.635
1	11846246	11856765	AT1G32750	-	58	-57.9	0.197	0.588
1	11874507	11877549	AT1G32790	-	17.5	17	0.0106	0.242
1	11881310	11886015	AT1G32810	+	14.9	14	0.427	0.771
1	11911630	11913947	AT1G32870	+	208.6	-196.7	0.904	0.966
1	11920389	11923866	AT1G32900	-	79	-17.5	0.0248	0.342
1	11928756	11929993	AT1G32920	+	9.8	5	0.924	0.971
1	11931148	11931801	AT1G32928	+	6.4	1.4	0.403	0.755
1	11955655	11957402	AT1G32990	+	7.7	-2	0.53	0.834
1	11966422	11967843	AT1G33040	+	4.7	-4.1	0.0703	0.47
1	11967782	11971532	AT1G33050	-	31.8	28.3	0.206	0.594
1	11971307	11972580	AT1G33055	-	85.6	61.2	0.341	0.709
1	11975306	11978622	AT1G33060	-	39.3	-30.5	0.605	0.871
1	12002237	12003005	AT1G33102	-	207.2	201	0.158	0.559
1	12004853	12008852	AT1G33110	+	18.2	18.1	0.197	0.588
1	12010878	12012547	AT1G33120	+	12.4	0.6	0.181	0.574
1	12023224	12024783	AT1G33140	+	6.3	3.9	0.0464	0.416
1	12026935	12030539	AT1G33170	+	26.2	-13.8	0.526	0.832
1	12046378	12050095	AT1G33230	+	8.2	-6.7	0.705	0.913
1	12051360	12054753	AT1G33240	-	50.8	42.8	0.847	0.953
1	12057197	12059792	AT1G33250	-	26.2	18.4	0.198	0.588
1	12066594	12068101	AT1G33265	+	9.9	-9.3	0.161	0.56
1	12068062	12070455	AT1G33270	-	13.5	10.7	0.576	0.856
1	12074098	12076289	AT1G33290	+	14.2	-9.9	0.111	0.519
1	12084913	12086584	AT1G33330	+	50.7	50	0.25	0.632
1	12109560	12118861	AT1G33410	-	28.4	27.9	0.784	0.938
1	12144439	12147208	AT1G33470	+	8.1	3.1	0.564	0.851
1	12148514	12150617	AT1G33480	-	33	-33	0.000202	0.0255
1	12150673	12152460	AT1G33490	-	9.5	7.7	0.0201	0.314
1	12157053	12159125	AT1G33520	-	53.9	53.2	0.0714	0.471
1	12168767	12172119	AT1G33560	+	39.8	33.5	0.332	0.702
1	12177672	12179628	AT1G33590	+	3.6	2.4	0.72	0.917
1	12180482	12184528	AT1G33600	+	21	10	0.246	0.63
1	12188677	12190461	AT1G33610	+	14	-5.5	0.292	0.668
1	12203944	12208698	AT1G33680	+	57.4	-34.5	0.972	0.986
1	12244559	12246231	AT1G33780	-	5.8	-3.7	0.238	0.624
1	12256473	12260638	AT1G33790	+	107	-103.9	0.0787	0.481
1	12264941	12266920	AT1G33810	+	6.2	5.6	0.0953	0.502
1	12267807	12269913	AT1G33811	+	14.9	-6.1	0.271	0.65
1	12349303	12351318	AT1G33970	-	9.6	7.8	0.52	0.829
1	12351565	12355173	AT1G33980	+	8.9	-5.8	0.0465	0.416
1	12355556	12358031	AT1G33990	+	5.1	4.1	0.388	0.745
1	12357909	12358966	AT1G34000	-	12.4	10.4	0.0854	0.487
1	12359453	12361313	AT1G34010	-	27.7	-25.4	0.0544	0.441
1	12366809	12370014	AT1G34020	+	95.4	-94.2	0.00339	0.149
1	12370064	12371554	AT1G34030	-	11.6	-5.1	0.0618	0.459
1	12417011	12421792	AT1G34110	-	20	-14.5	0.769	0.934
1	12426699	12429714	AT1G34120	+	41.6	-38.9	0.574	0.855
1	12429845	12433236	AT1G34130	+	75.4	-49.6	0.94	0.977
1	12435881	12439499	AT1G34150	+	35.3	34.9	0.17	0.566
1	12451404	12454542	AT1G34190	+	11.9	6.5	0.0962	0.502
1	12455652	12457547	AT1G34200	+	45.4	44.4	0.0874	0.49
1	12458563	12462905	AT1G34210	+	5.3	-4.9	0.769	0.934
1	12462848	12466089	AT1G34220	-	23	-22.9	0.151	0.552
1	12485317	12492207	AT1G34260	+	176.5	176.3	0.315	0.688
1	12492320	12494584	AT1G34270	-	27.2	27.1	0.77	0.934
1	12503359	12506172	AT1G34300	+	11.8	-5.2	0.0986	0.508
1	12520058	12524377	AT1G34320	+	4	2.7	0.518	0.828
1	12530814	12534306	AT1G34340	+	12.7	-3.9	0.564	0.851
1	12534425	12536162	AT1G34350	+	6.4	-5.8	0.215	0.602
1	12542795	12546244	AT1G34360	+	15.3	-4.2	0.0252	0.344
1	12550338	12552629	AT1G34370	+	22.3	16.3	0.126	0.53
1	12552654	12554363	AT1G34380	-	7.3	4.9	0.555	0.847
1	12582121	12582721	AT1G34418	+	2.4	2.4	0.116	0.524
1	12587725	12590223	AT1G34430	-	18.8	-11.7	0.884	0.962
1	12604160	12607033	AT1G34470	+	9.2	1.2	0.0649	0.463
1	12646673	12652646	AT1G34550	-	4.6	3.7	0.0834	0.485
1	12654926	12656605	AT1G34570	-	17.8	-3.8	0.359	0.723
1	12685175	12687641	AT1G34630	+	89.3	89	0.0647	0.463
1	12687551	12688543	AT1G34640	-	10.5	4.1	0.622	0.881
1	12735999	12738196	AT1G34750	-	11.7	-1.1	0.337	0.705
1	12743721	12745748	AT1G34760	-	16.4	-4.3	0.789	0.94
1	12746404	12748617	AT1G34770	+	2.8	0.6	0.943	0.978
1	12748570	12750506	AT1G34780	-	8.9	8.9	0.12	0.528
1	12751155	12752905	AT1G34844	+	130.9	8.7	0.0452	0.415
1	12842157	12845455	AT1G35115	+	5.9	2.2	0.251	0.633
1	12867080	12868890	AT1G35160	+	30.8	27.2	0.0774	0.479
1	12877106	12878835	AT1G35180	-	5	-1.2	0.529	0.833
1	12890403	12892955	AT1G35190	+	8.1	2.6	0.57	0.854
1	12956118	12957090	AT1G35310	-	10.3	-8.2	0.537	0.837
1	12977667	12979947	AT1G35340	+	7.5	-7.5	0.0584	0.451
1	12980688	12984740	AT1G35350	-	63.3	-13.1	0.00139	0.0894
1	13026205	13027691	AT1G35420	+	34.6	30.4	0.158	0.559
1	13030552	13031375	AT1G35430	-	5.9	4.9	0.221	0.607
1	13039659	13042159	AT1G35460	+	15	-12.2	0.566	0.852
1	13051156	13055093	AT1G35470	-	6.6	6.1	0.268	0.648
1	13071164	13074984	AT1G35510	+	48.3	4.3	0.118	0.525
1	13077889	13080265	AT1G35515	+	4.8	0.2	0.992	0.996
1	13078415	13079773	AT1G35516	+	5.8	-5	0.909	0.968
1	13115825	13117235	AT1G35560	-	13.6	5.6	0.629	0.884
1	13122081	13125328	AT1G35580	-	5.6	-2.8	0.237	0.623
1	13145642	13146693	AT1G35612	+	13.1	5.2	0.0435	0.41
1	13156345	13158467	AT1G35620	+	5.3	-1.1	0.286	0.662
1	13205344	13208289	AT1G35670	+	18.6	-18.6	0.18	0.574
1	13208682	13210428	AT1G35680	+	7.2	-4.4	0.217	0.604
1	13225167	13227239	AT1G35720	+	3.4	3.2	0.186	0.578
1	13277258	13280387	AT1G35780	-	15.5	9.2	0.448	0.782
1	13450088	13453683	AT1G36050	+	38	37.3	0.0436	0.411
1	13466693	13470936	AT1G36070	-	127.9	112.5	0.352	0.718
1	13533167	13544015	AT1G36160	+	55.8	54.8	0.342	0.71
1	13640507	13643126	AT1G36280	+	13.6	8.9	0.949	0.98
1	13669424	13671203	AT1G36310	+	7.5	2.3	0.837	0.951
1	13671773	13674205	AT1G36320	+	4.8	-1	0.352	0.718
1	13696041	13698739	AT1G36370	-	8.1	2.4	0.594	0.865
1	13700764	13701632	AT1G36380	+	143.3	138.9	0.101	0.511
1	13701400	13703573	AT1G36390	-	11.9	-3.2	0.686	0.906
1	13898209	13900831	AT1G36730	-	10.6	-1.8	0.00878	0.226
1	14003818	14005502	AT1G36940	+	19.3	-19.3	0.00854	0.224
1	14024633	14027040	AT1G36980	+	3	2	0.698	0.911
1	14027221	14030500	AT1G36990	-	300.2	300.2	0.115	0.523
1	14158451	14161938	AT1G37130	+	8	2.7	0.0499	0.426
1	15603567	15607966	AT1G41830	-	13.2	-8.9	0.902	0.965
1	15650634	15652542	AT1G41880	-	7.2	3.3	0.000707	0.0585
1	15891280	15894576	AT1G42430	+	56.4	44.8	0.553	0.847
1	15895196	15900105	AT1G42440	-	12.4	-10.2	0.916	0.969
1	15926675	15935529	AT1G42470	+	136	134.7	0.181	0.574
1	15936155	15938974	AT1G42480	+	6	-2.5	0.721	0.918
1	15973053	15976813	AT1G42540	+	42.2	37.8	0.348	0.714
1	15976804	15979952	AT1G42550	+	85.9	80.7	0.011	0.248
1	16125742	16127298	AT1G42960	+	3.9	-1.1	0.000298	0.0333
1	16127352	16129895	AT1G42970	+	6.9	-1.6	0.00183	0.107
1	16135722	16137463	AT1G42990	-	20.5	-8.1	0.274	0.652
1	16228188	16231254	AT1G43130	-	5.5	-2.6	0.957	0.982
1	16266552	16268945	AT1G43170	+	7.2	-3.2	1.36e-05	0.0044
1	16275107	16278742	AT1G43190	-	12.5	-2	0.435	0.775
1	16308509	16311094	AT1G43245	-	43.8	-42.4	0.901	0.965
1	16397978	16399880	AT1G43560	-	15.2	15.1	0.13	0.536
1	16410371	16412736	AT1G43580	-	5.8	5.7	0.442	0.78
1	16425411	16430287	AT1G43620	-	101.2	-54.1	0.786	0.939
1	16467297	16470500	AT1G43670	+	26.6	26.1	0.00882	0.226
1	16478158	16482859	AT1G43690	+	2.7	-0.5	0.939	0.976
1	16484230	16486327	AT1G43700	+	5.5	4.7	0.783	0.938
1	16486229	16488462	AT1G43710	-	8.7	8.7	0.0718	0.471
1	16575758	16576541	AT1G43790	+	4.5	-4.1	0.093	0.497
1	16616987	16622049	AT1G43850	+	23.6	2.7	0.142	0.548
1	16620768	16624504	AT1G43860	-	149.6	-142.8	0.404	0.755
1	16638996	16645265	AT1G43886	-	909.5	904.5	0.0318	0.374
1	16646695	16648639	AT1G43890	+	52.9	51.2	0.104	0.513
1	16654029	16655928	AT1G43900	+	8.6	6.1	0.0661	0.465
1	16708003	16709713	AT1G44000	-	3.3	1	0.121	0.528
1	16764391	16767685	AT1G44100	-	83.4	-83.4	0.0169	0.294
1	16796399	16800321	AT1G44170	-	13.2	-11.5	0.921	0.97
1	16834209	16838562	AT1G44350	-	19.9	18	0.575	0.855
1	16848307	16851271	AT1G44446	-	8.9	-1.7	0.17	0.566
1	16870220	16873427	AT1G44575	+	3.5	3.3	0.271	0.65
1	16892526	16896089	AT1G44750	+	33.1	-25.8	0.149	0.552
1	16896678	16898645	AT1G44760	-	5.8	-2.4	0.893	0.963
1	16907536	16909572	AT1G44770	-	17.6	13.3	0.151	0.552
1	16912153	16913664	AT1G44790	-	89.8	-81.5	0.903	0.966
1	16913993	16917053	AT1G44800	-	15.9	-12.9	0.958	0.982
1	16923439	16924821	AT1G44810	+	5.9	-0.7	0.949	0.979
1	16926296	16929196	AT1G44820	+	15.5	-12.2	0.575	0.856
1	16939691	16942558	AT1G44835	+	5.4	-0.6	0.863	0.958
1	16970213	16974753	AT1G44900	+	13.7	-13.7	0.22	0.606
1	16982903	16984444	AT1G44920	-	11.5	0.3	0.0603	0.455
1	16999445	17001734	AT1G44960	+	18.4	3.9	0.699	0.911
1	17009050	17011929	AT1G45000	+	4	1.6	0.692	0.908
1	17013384	17015520	AT1G45010	-	67.6	-57.2	0.154	0.554
1	17031210	17033269	AT1G45050	+	15	13.8	0.894	0.963
1	17052474	17054827	AT1G45110	+	24.5	7.1	0.581	0.858
1	17065110	17069269	AT1G45130	+	25.7	-21.6	0.327	0.697
1	17074941	17076417	AT1G45145	-	19.5	-16.6	0.144	0.549
1	17077385	17082592	AT1G45150	-	4.9	3.7	0.796	0.941
1	17083076	17090588	AT1G45160	-	56.6	20.2	0.91	0.968
1	17090676	17091464	AT1G45163	-	12.5	-12.3	0.146	0.55
1	17095979	17098041	AT1G45170	-	4.7	-1.6	0.701	0.912
1	17115761	17119246	AT1G45191	+	189	188.9	0.0696	0.469
1	17123784	17129223	AT1G45201	+	15.5	-4.5	0.817	0.948
1	17130349	17133809	AT1G45207	-	22.9	19.5	0.0722	0.472
1	17147706	17151211	AT1G45231	-	14.3	9.5	0.932	0.973
1	17152895	17154843	AT1G45233	+	47.5	-47.2	0.238	0.624
1	17165124	17167924	AT1G45249	-	377.1	-363.2	0.254	0.635
1	17169435	17171472	AT1G45230	-	11.1	5.1	0.111	0.519
1	17172120	17177060	AT1G45332	-	12.9	8.8	0.156	0.556
1	17179249	17180806	AT1G45474	+	6.7	4.3	0.696	0.911
1	17191361	17193314	AT1G45688	+	8.8	7	0.0339	0.382
1	17199313	17200841	AT1G45976	+	4.3	-0.6	0.698	0.911
1	17252951	17253903	AT1G46554	+	25	-25	0.201	0.591
1	17265585	17266824	AT1G46768	-	15.1	-14.2	0.435	0.775
1	17275889	17277839	AT1G47056	-	16.8	8.7	0.201	0.591
1	17282748	17285749	AT1G47128	-	5.1	-1.1	0.648	0.891
1	17297830	17298829	AT1G47200	-	24.9	-16.6	0.637	0.885
1	17300690	17302914	AT1G47210	+	51.2	50.2	0.427	0.771
1	17306573	17308848	AT1G47230	+	9.7	1.9	0.946	0.978
1	17319118	17321202	AT1G47250	+	10.8	0.6	0.599	0.868
1	17319550	17323484	AT1G47260	-	4.3	-2.7	0.0996	0.509
1	17326529	17328772	AT1G47270	+	5.6	3.9	0.634	0.885
1	17330818	17332336	AT1G47278	+	49.3	-48.5	0.00453	0.172
1	17335750	17339275	AT1G47290	+	24.7	-17.1	0.797	0.942
1	17342738	17344828	AT1G47310	+	3	-1.5	0.554	0.847
1	17351017	17353875	AT1G47330	+	6.7	-6.5	0.0443	0.412
1	17372370	17376091	AT1G47380	-	11	7.6	0.12	0.527
1	17382997	17383830	AT1G47395	+	18	-14.3	0.0636	0.461
1	17394071	17395673	AT1G47410	+	11	9.7	0.508	0.824
1	17395517	17397263	AT1G47420	-	12.1	-1.7	0.955	0.982
1	17424472	17427475	AT1G47490	+	5.4	-4.5	0.131	0.537
1	17432432	17435124	AT1G47500	+	7.7	6.2	0.914	0.969
1	17443287	17446628	AT1G47520	+	24.5	23.1	0.736	0.922
1	17451552	17454461	AT1G47530	+	12.5	-9	0.351	0.717
1	17456986	17465195	AT1G47550	+	74	-26.5	0.553	0.847
1	17477578	17483502	AT1G47570	+	1467.5	-1466.6	0.00128	0.0856
1	17485575	17486463	AT1G47580	+	3.4	-3.3	0.652	0.893
1	17518046	17520129	AT1G47640	-	30.4	-27.2	0.715	0.916
1	17525341	17526308	AT1G47655	+	17.4	11.3	0.355	0.719
1	17536624	17539719	AT1G47670	-	27	-24.5	0.236	0.622
1	17557090	17560331	AT1G47710	+	3.4	-0.4	0.88	0.961
1	17561285	17562934	AT1G47720	-	37.8	37.8	0.105	0.514
1	17566510	17569297	AT1G47740	+	85.2	65.5	0.0922	0.496
1	17569255	17570159	AT1G47750	-	3.7	0.6	0.533	0.835
1	17611904	17612613	AT1G47820	+	67	-59.2	0.684	0.905
1	17613028	17614986	AT1G47830	-	9.9	-7.4	0.279	0.657
1	17647143	17651791	AT1G47900	-	38.5	35.5	0.844	0.953
1	17681156	17683719	AT1G47960	-	116	-115.2	0.0345	0.384
1	17686989	17688859	AT1G47970	+	31.5	-17.4	0.708	0.913
1	17716892	17719500	AT1G48030	-	4.4	3.6	0.116	0.524
1	17719583	17721891	AT1G48040	-	242.7	-223.3	0.795	0.941
1	17723381	17727243	AT1G48050	+	225.8	186	0.047	0.418
1	17732009	17758508	AT1G48090	-	195.9	180.2	0.316	0.688
1	17769937	17773518	AT1G48110	-	4.8	0.9	0.955	0.982
1	17773626	17780106	AT1G48120	-	290.4	275	0.0448	0.414
1	17780428	17781727	AT1G48130	+	3.8	-3	0.91	0.968
1	17781987	17784211	AT1G48140	+	22.8	-12.8	0.0884	0.491
1	17786497	17789024	AT1G48160	-	11	9.2	0.837	0.951
1	17788762	17790246	AT1G48170	+	59.7	-43.3	0.509	0.824
1	17790363	17792340	AT1G48175	+	13.2	11.1	0.502	0.819
1	17796763	17798337	AT1G48200	-	25.7	-19.7	0.596	0.866
1	17798430	17802330	AT1G48210	+	6.4	-2	0.631	0.885
1	17805760	17808993	AT1G48230	+	22.1	-19.6	0.0119	0.255
1	17808987	17812106	AT1G48240	-	4.2	-1.7	0.864	0.958
1	17847041	17848338	AT1G48300	+	17.6	17.3	0.151	0.552
1	17854812	17855715	AT1G48320	-	4.6	2.1	0.888	0.962
1	17863659	17864558	AT1G48330	+	28.8	-26.4	0.0445	0.412
1	17867101	17868432	AT1G48350	+	8	5.5	0.0817	0.484
1	17886035	17892632	AT1G48410	-	13.4	13.4	0.0146	0.278
1	17895783	17898813	AT1G48420	-	5	-1.1	0.899	0.964
1	17902631	17906873	AT1G48430	-	22.9	17.9	0.5	0.818
1	17906870	17908534	AT1G48440	+	20.2	-17.2	0.806	0.944
1	17908502	17910523	AT1G48450	-	6.6	-1.5	0.0406	0.406
1	17910778	17913344	AT1G48460	+	3.7	2	0.75	0.927
1	17918206	17921116	AT1G48480	+	22.2	5.4	0.914	0.969
1	17921899	17928954	AT1G48490	-	48.4	41.5	0.558	0.848
1	17940049	17942864	AT1G48520	+	14.2	14.2	0.416	0.764
1	17945368	17950598	AT1G48540	+	263.4	258.1	0.253	0.634
1	17950568	17952743	AT1G48550	-	21.3	0.3	0.042	0.407
1	17953869	17957719	AT1G48570	-	7.6	1.3	0.882	0.961
1	17965870	17969354	AT1G48600	+	13.3	5.5	0.0093	0.227
1	17970610	17973402	AT1G48610	-	29.4	-1.4	0.467	0.797
1	17973641	17976663	AT1G48620	-	42.6	1.7	0.394	0.75
1	17981635	17983377	AT1G48630	-	3.2	-2.7	0.659	0.894
1	17983645	17986292	AT1G48635	+	42.2	6.6	0.281	0.657
1	17989130	17995339	AT1G48650	-	4.2	3.6	0.505	0.822
1	18030703	18031593	AT1G48745	+	12.4	-12.3	0.0605	0.455
1	18035966	18036510	AT1G48750	+	2.1	0.9	0.575	0.855
1	18035966	18039405	AT1G48760	-	41.3	-18.8	0.43	0.774
1	18043671	18047806	AT1G48790	-	7.7	-0.8	0.28	0.657
1	18059449	18061302	AT1G48830	-	10.4	-8	0.0702	0.47
1	18061355	18065031	AT1G48840	+	53.6	-52	0.217	0.604
1	18064904	18068154	AT1G48850	-	7.2	5	0.221	0.607
1	18068697	18071667	AT1G48860	-	4.8	-2.7	0.942	0.977
1	18084714	18087934	AT1G48900	-	15.4	13.9	0.85	0.955
1	18098080	18101732	AT1G48920	+	16	13.6	0.518	0.828
1	18106859	18110386	AT1G48950	+	17.1	-16.6	0.859	0.958
1	18113713	18117833	AT1G48970	-	62.4	-20	0.548	0.843
1	18132544	18134017	AT1G49010	+	26.9	-26.9	0.0199	0.314
1	18137976	18139131	AT1G49032	+	16.1	15.4	0.386	0.744
1	18139173	18149019	AT1G49040	-	138.3	135.6	0.424	0.769
1	18150465	18153364	AT1G49050	+	16.5	-2.5	0.89	0.962
1	18176771	18179264	AT1G49140	-	10.3	7.2	0.0333	0.381
1	18183183	18184583	AT1G49170	-	7	0.5	0.858	0.958
1	18184653	18187529	AT1G49180	-	48.3	36	0.472	0.8
1	18198226	18199168	AT1G49200	+	11.8	11.7	0.00444	0.171
1	18215799	18218339	AT1G49240	+	10.5	-4.5	0.773	0.935
1	18218340	18219269	AT1G49245	+	7.6	7.1	0.149	0.552
1	18234678	18237543	AT1G49300	+	10.1	-1.4	0.735	0.922
1	18237700	18238497	AT1G49310	-	9.1	2.7	0.809	0.946
1	18246304	18248088	AT1G49320	+	9	-4.7	0.551	0.846
1	18252049	18264672	AT1G49340	+	12.1	11.1	0.69	0.907
1	18267230	18269465	AT1G49360	-	6.5	-2.6	0.697	0.911
1	18276642	18279532	AT1G49380	+	20.2	13.5	0.122	0.528
1	18282967	18284202	AT1G49400	+	7.1	5.2	0.644	0.888
1	18285305	18287034	AT1G49410	-	24.9	-24.4	0.404	0.755
1	18290941	18295905	AT1G49430	+	14.2	11.8	0.285	0.66
1	18310427	18311714	AT1G49470	+	11.2	9.5	0.28	0.657
1	18314116	18316861	AT1G49480	-	17.3	9.2	0.75	0.927
1	18320489	18322505	AT1G49500	-	9	-6.7	0.106	0.515
1	18326845	18328714	AT1G49510	+	3.7	2.3	0.792	0.94
1	18329658	18332102	AT1G49520	+	204.2	172.5	0.416	0.764
1	18333622	18337520	AT1G49540	-	9.6	6.5	0.382	0.74
1	18351323	18354634	AT1G49580	+	17.6	17.6	0.536	0.837
1	18354743	18356733	AT1G49590	+	5.2	-3.5	0.465	0.796
1	18356798	18360447	AT1G49600	-	41.4	26.1	0.538	0.837
1	18367589	18375494	AT1G49630	-	53.7	-41	0.34	0.708
1	18377153	18378634	AT1G49650	-	21.8	-19.1	0.279	0.656
1	18378633	18379901	AT1G49660	-	9.4	-7.7	0.671	0.899
1	18380803	18386146	AT1G49670	-	24.7	22.8	0.115	0.522
1	18388791	18390523	AT1G49700	-	9	8.9	0.673	0.9
1	18391272	18394030	AT1G49710	-	7.2	-5.9	0.384	0.742
1	18402505	18405681	AT1G49730	-	9.1	-2.1	0.934	0.974
1	18407399	18410022	AT1G49740	+	112.6	99.8	0.913	0.969
1	18410856	18413016	AT1G49750	-	5.5	0.8	0.99	0.994
1	18416473	18420111	AT1G49760	+	28.2	25.7	0.5	0.818
1	18428787	18430497	AT1G49780	-	42.4	35.9	0.956	0.982
1	18442881	18445350	AT1G49820	+	145.2	-123.4	0.116	0.524
1	18451745	18454463	AT1G49840	+	18.6	16.2	0.843	0.952
1	18454843	18456619	AT1G49850	-	11.5	7	0.316	0.688
1	18463997	18466085	AT1G49880	+	8.5	5.4	0.725	0.919
1	18470045	18473833	AT1G49890	+	19.6	15.3	0.81	0.946
1	18494028	18497318	AT1G49950	-	10.4	4.1	0.259	0.639
1	18501569	18504654	AT1G49970	-	7.4	4.8	0.822	0.949
1	18504756	18506184	AT1G49975	+	6.6	1.4	0.665	0.896
1	18507921	18513340	AT1G49980	+	9.6	5.8	0.682	0.904
[truncated: 11,309 more rows]
