# Supplementary material for: m6A modification of U6 snRNA modulates usage of two major classes of pre-mRNA 5’ splice site
Source: eLife. 2022 Nov 21;11:e78808. doi: 10.7554/eLife.78808 (PMC9803359; doi:10.7554/eLife.78808)
Supplement: Figure 3—source data 2. [file elife-78808-fig3-data2.xlsx]

## Sheet: psi_model_fits
						Figure 3 source data 2: Differential splicing analysis results from Illumina RNA-seq experiment on Col-0 and fio1-3 mutants at four temperatures.
								coefficients					p_vals					fdrs
event_id	event_class	chrom	alt1_coordinates	alt2_coordinates	strand	gene_ids	dpsi	constant	genotype	temperature	geno_x_temp	temp_x_temp	constant	genotype	temperature	geno_x_temp	temp_x_temp	constant	genotype	temperature	geno_x_temp	temp_x_temp
A5.1229	A5	1	[7649 8235]	[7649 7761]	-	AT1G01020	0.0462544	0.695223	0.12146	0.00997925	-0.00470033	-4.56048e-05	6.19108e-44	0.017914	0.12844	0.0930882	0.815625	1.80055e-43	0.0796684	0.349095	0.370637	0.92374
A5.1228	A5	1	[8464 8570]	[8464 8593]	-	AT1G01020	0.348471	0.122156	0.350542	0.00678591	-0.000129453	-9.15118e-05	2.75425e-06	2.73291e-39	0.0472282	0.929262	0.369147	4.6222e-06	3.82479e-37	0.184301	0.990653	0.620234
A5.0	A5	1	[27536 27617]	[27533 27617]	+	AT1G01040	0.0377713	0.886454	0.0147231	-0.00589329	0.00144051	4.61611e-05	3.80041e-86	0.750127	0.319073	0.567891	0.793377	1.32163e-85	0.900949	0.589645	0.839405	0.912368
A5.2191	A5	1	[37203 37301]	[37203 37372]	-	AT1G01050_and_AT1G01060	0.00343655	0.982634	0.0107218	-0.00409323	-0.000497827	0.000115408	1.9609e-236	0.745282	0.308836	0.814229	0.393134	8.76774e-236	0.898787	0.58026	0.950843	0.641493
A5.1230	A5	1	[46145 46375]	[46145 46372]	-	AT1G01080	0.00934076	0.0451706	-0.00371151	-0.0033356	0.000815767	8.56453e-05	0.0086978	0.833559	0.139915	0.397204	0.203365	0.0117786	0.944412	0.368368	0.728635	0.446679
A5.1231	A5	1	[50963 51125]	[50963 51122]	-	AT1G01100	0.00094181	0.00176778	-0.000991794	1.67928e-05	0.00012085	-3.02117e-07	0.101017	0.3698	0.905522	0.0451605	0.942868	0.122406	0.64285	0.968485	0.245394	0.985205
A5.2193	A5	1	[64475 64581]	[64475 64569]	-	AT1G01140_and_AT1G01130_and_MSTRG.18	0.000326544	0.00105205	0.00173547	-0.000146577	-8.80577e-05	4.6946e-06	0.0521645	0.00179438	0.0392866	0.00368429	0.0267184	0.0653564	0.0119053	0.162095	0.0453229	0.118665
A5.2192	A5	1	[65652 65732]	[65652 65738]	-	AT1G01140_and_AT1G01130_and_MSTRG.18	0.000246244	0.995125	0.000740408	0.000317522	-3.08853e-05	-6.96885e-06	0	0.637749	0.114512	0.71883	0.245019	0	0.837982	0.325972	0.9113	0.498602
A5.2	A5	1	[92089 92269]	[92070 92269]	+	AT1G01220	0.0277545	0.678922	0.0325935	-0.00559522	-0.000302434	0.000497869	2.61452e-150	0.221721	0.101092	0.835354	9.76018e-07	1.04757e-149	0.479124	0.302078	0.957581	2.57024e-05
A5.3	A5	1	[100220 100656]	[100031 100656]	+	AT1G01240	0.013122	0.981656	0.0182248	-0.0028427	-0.000318931	7.01844e-05	0	0.0129079	0.00243618	0.425134	0.0120156	0	0.0613397	0.0205963	0.747949	0.0667367
A5.5	A5	1	[144559 144926]	[144713 144926]	+	AT1G01370	0.0563817	0.0845322	0.0446681	-0.0045652	0.000696451	9.63913e-05	0.000883402	0.0852695	0.175276	0.629233	0.337727	0.00129546	0.253151	0.420741	0.871237	0.590915
A5.6	A5	1	[147528 147643]	[147539 147643]	+	AT1G01380	0.000324985	0.977566	0.0363807	-0.00374537	-0.00246257	0.000169096	3.48539e-275	0.200284	0.309912	0.127753	0.131465	1.62267e-274	0.448313	0.581147	0.438705	0.344676
A5.1232	A5	1	[160302 160417]	[160302 160428]	-	AT1G01440	0.0904672	-0.00768722	0.0558343	0.0017455	0.00216456	-4.66106e-05	0.528007	7.90356e-06	0.27497	0.00149887	0.327884	0.569667	9.49256e-05	0.543331	0.0229488	0.580485
A5.1233	A5	1	[162700 162894]	[162700 162766]	-	AT1G01440	0.00509721	0.00709614	0.0139043	-0.00125243	-0.000550444	3.98219e-05	0.440002	0.140254	0.299112	0.284512	0.267846	0.484575	0.356251	0.56985	0.635495	0.525572
A5.7	A5	1	[164103 164224]	[164135 164224]	+	AT1G01448	0.418512	0.194117	0.466394	0.00642709	-0.00299263	0.000101228	1.13537e-10	1.60632e-51	0.103853	0.0757202	0.389924	2.20261e-10	3.52091e-49	0.307082	0.329329	0.638733
A5.1235	A5	1	[181422 181953]	[181422 181593]	-	AT1G01490	0.000226344	0.0016562	4.41658e-05	-9.14516e-05	1.13861e-05	3.12152e-06	0.00295584	0.938416	0.211147	0.715031	0.152018	0.00417026	0.984989	0.467837	0.9102	0.374982
A5.1234	A5	1	[181422 182060]	[181422 181593]	-	AT1G01490	0.000539203	0.00370291	2.15222e-05	-0.000232404	3.2355e-05	8.62346e-06	0.00284536	0.986512	0.153622	0.641313	0.0755844	0.00402125	1	0.38925	0.877469	0.242381
A5.1237	A5	1	[234988 235197]	[234988 235187]	-	AT1G01650	0.159762	0.070424	0.151298	-0.00587419	0.000528961	0.000180473	5.55262e-05	3.12863e-17	0.0104158	0.588516	0.00825542	8.73504e-05	1.39827e-15	0.0624108	0.849984	0.0503878
A5.1236	A5	1	[237023 237219]	[237023 237503]	-	AT1G01650	0.000485658	0.987717	0.000590714	-4.09527e-05	-6.56605e-06	-7.12709e-06	0	0.909675	0.950982	0.981559	0.71955	0	0.974647	0.988114	1	0.870497
A5.875	A5	1	[263444 263525]	[263424 263525]	+	AT1G01710_and_AT1G01715_and_MSTRG.85_and_AT1G01720_and_AT1G04047_and_AT1G01730	0.0723362	0.0439924	0.0548036	-0.00211654	0.00109579	5.61994e-05	0.000129754	3.36712e-06	0.160689	0.0885316	0.211273	0.000200133	4.33768e-05	0.399578	0.360469	0.457641
A5.1238	A5	1	[274083 274166]	[274083 274170]	-	AT1G01740	0.267191	0.409275	0.288703	-0.00287188	-0.0013445	-1.81866e-05	2.69059e-12	1.5218e-06	0.708515	0.681465	0.936669	5.42889e-12	2.08958e-05	0.870732	0.893926	0.982676
A5.876	A5	1	[282189 282483]	[282181 282483]	+	AT1G01770_and_AT1G01780	0.0421682	0.0155011	0.000909649	-0.00213073	0.00257866	7.3218e-05	0.0556339	0.912824	0.0450355	1.28001e-08	0.0208026	0.0694986	0.975979	0.178409	9.63564e-07	0.0992677
A5.8	A5	1	[293756 294054]	[293752 294054]	+	AT1G01800	0.000430977	0.997454	0.000438927	9.04849e-05	-4.96927e-07	-1.15342e-06	0	0.649526	0.464046	0.992476	0.754093	0	0.845296	0.711585	1	0.891303
A5.2198	A5	1	[301544 302047]	[301544 302053]	-	AT1G01830_and_AT1G01820	0.141841	0.854243	0.111315	-0.00180615	0.00190783	-1.66785e-06	3.88747e-142	0.0012636	0.682626	0.311108	0.989889	1.53613e-141	0.00883598	0.857438	0.661771	1
A5.2199	A5	1	[308318 308396]	[308318 308399]	-	AT1G01880_and_AT1G01890	0.00473961	-0.0110855	0.00747945	0.00296661	-0.00016349	-0.000100777	0.65222	0.746356	0.315778	0.902854	0.245889	0.690117	0.899034	0.586757	0.981185	0.49952
A5.10	A5	1	[317193 317293]	[317202 317293]	+	AT1G01920	0.022814	0.0160887	-0.0159463	-0.00313505	0.00242252	0.000127413	0.536476	0.550367	0.358775	0.0963022	0.210661	0.577904	0.780741	0.623402	0.377484	0.457105
A5.9	A5	1	[317845 317978]	[317860 317978]	+	AT1G01920	0.0430879	0.0142772	0.026158	0.0100359	0.00105812	-0.000305062	0.515854	0.245891	0.000501949	0.389564	0.00038532	0.558037	0.511009	0.00571329	0.72341	0.00442806
A5.1240	A5	1	[320145 320251]	[320145 320228]	-	AT1G01930	0.0122177	0.00382073	-0.00644447	-0.000594537	0.00116639	2.04334e-05	0.346696	0.121826	0.264587	2.85382e-07	0.198152	0.389105	0.322814	0.531599	1.54677e-05	0.440125
A5.1239	A5	1	[320145 320251]	[320145 320254]	-	AT1G01930	0.0310208	0.0184027	0.0306102	0.00128013	2.56653e-05	-3.63485e-05	0.0169802	0.000108651	0.205825	0.952566	0.227961	0.0223568	0.00103315	0.46085	0.997445	0.478854
A5.11	A5	1	[328555 328897]	[328504 328897]	+	AT1G01950	0.000369036	0.000445196	-0.000648229	-1.66527e-05	6.35791e-05	-1.23306e-07	0.572562	0.423199	0.872243	0.149903	0.968123	0.612681	0.68945	0.954291	0.474852	0.996641
A5.2200	A5	1	[360443 360891]	[360443 360722]	-	AT1G02050_and_AT1G02040_and_AT1G02060	0.148287	0.37231	0.152603	0.0215387	-0.000269737	-0.000934826	2.33491e-05	0.0910072	0.0622533	0.95633	0.00660917	3.75364e-05	0.264134	0.221499	0.998641	0.0426449
A5.879	A5	1	[392072 392261]	[392076 392261]	+	AT1G02100_and_AT1G02110_and_AT1G02120	0.00106799	0.000338941	-0.000152524	0.000225293	7.62821e-05	-6.64513e-06	0.793729	0.908689	0.185458	0.293051	0.189927	0.821992	0.974249	0.434656	0.643399	0.429131
A5.877	A5	1	[392072 392261]	[392170 392261]	+	AT1G02100_and_AT1G02110_and_AT1G02120	0.142174	0.0691586	0.154269	0.00226102	-0.000755932	-4.6831e-05	1.30015e-07	1.70191e-30	0.188557	0.302562	0.360706	2.29933e-07	1.72564e-28	0.43841	0.653436	0.612583
A5.878	A5	1	[392076 392261]	[392170 392261]	+	AT1G02100_and_AT1G02110_and_AT1G02120	0.00781562	0.983339	0.0129721	-0.000202156	-0.00032228	7.97024e-06	0	0.0996211	0.841031	0.453313	0.790698	0	0.282052	0.939451	0.768536	0.910945
A5.882	A5	1	[407630 407721]	[407550 407721]	+	AT1G02145_and_AT1G02150_and_AT1G02160_and_AT1G02170	0.0132515	0.969013	0.021807	0.000295998	-0.000534725	1.70709e-06	0	0.000350713	0.704511	0.10812	0.941484	0	0.00289205	0.868296	0.40051	0.984655
A5.880	A5	1	[408329 408407]	[408309 408407]	+	AT1G02145_and_AT1G02150_and_AT1G02160_and_AT1G02170	0.0438168	0.0143942	0.0702382	-0.000991323	-0.00165134	2.52543e-05	0.0348815	1.07151e-23	0.268302	1.52836e-05	0.34391	0.0445146	7.64153e-22	0.536024	0.000507921	0.596675
A5.1242	A5	1	[442620 442803]	[442620 442717]	-	AT1G02260	0.321091	0.372077	0.282486	-0.000634579	0.00241282	0.000201268	1.72517e-06	0.000400423	0.950442	0.579432	0.508231	2.92235e-06	0.00325425	0.987889	0.844953	0.730589
A5.1243	A5	1	[467552 467683]	[467552 467648]	-	AT1G02340	0.0314795	0.0178655	0.0183898	-0.00124304	0.000818104	3.63846e-05	0.0923557	0.0912665	0.372286	0.168479	0.380769	0.112492	0.264732	0.635329	0.499234	0.630421
A5.12	A5	1	[470009 470346]	[469971 470346]	+	AT1G02350	0.0342837	0.297428	-0.0783128	-0.0222642	0.0064993	0.000539019	4.68901e-06	0.20825	0.00470994	0.0498503	0.0174161	7.77416e-06	0.459473	0.0342113	0.259706	0.0871242
A5.13	A5	1	[470009 470346]	[470037 470346]	+	AT1G02350	0.0116114	0.215427	-0.0582681	-0.0162648	0.00346736	0.000294889	6.30832e-06	0.184264	0.00318977	0.131403	0.0567264	1.04034e-05	0.425608	0.0253633	0.44513	0.20069
A5.17	A5	1	[491114 491233]	[491006 491233]	+	AT1G02410	0.00402831	0.997293	0.0016229	-0.000161528	0.000150338	8.68563e-07	0	0.724072	0.783601	0.548876	0.960472	0	0.888262	0.9123	0.829548	0.993422
A5.18	A5	1	[593387 593865]	[593229 593865]	+	AT1G02720	0.00355863	0.970918	-0.00269167	0.00174504	0.000390644	-7.37891e-05	0	0.877613	0.435195	0.682046	0.268111	0	0.963171	0.689805	0.894098	0.525884
A5.1244	A5	1	[600825 600935]	[600825 600914]	-	AT1G02740	0.0344942	0.0264285	0.0229687	-0.00272819	0.000720345	0.000116919	0.102	0.165966	0.198418	0.425819	0.0643443	0.123477	0.397737	0.451583	0.748448	0.217992
A5.2201	A5	1	[643949 644159]	[643949 644141]	-	AT1G02880_and_AT1G02890	0.0905892	0.162682	0.161423	-0.00283408	-0.00442711	5.1377e-05	3.54443e-07	8.43687e-07	0.499147	0.0132909	0.680933	6.16342e-07	1.22386e-05	0.737964	0.112589	0.849279
A5.2202	A5	1	[651539 651692]	[651539 651710]	-	AT1G02880_and_AT1G02890	0.00814321	0.980894	0.0161913	0.000442211	-0.000503003	6.34415e-06	0	1.33783e-07	0.26027	0.00267269	0.587789	0	2.19366e-06	0.527476	0.0357277	0.786304
A5.1245	A5	1	[655823 655932]	[655823 655937]	-	AT1G02910	0.228148	0.0191427	0.215261	-0.00203031	0.000805466	7.40039e-05	0.159633	1.30182e-53	0.255797	0.290383	0.164483	0.188544	3.07993e-51	0.522603	0.641133	0.39317
A5.1246	A5	1	[665777 665861]	[665777 665857]	-	AT1G02950	0						1	1	1	1	1	1	1	1	1	1
A5.1250	A5	1	[681921 682242]	[681921 682233]	-	AT1G02990	0.0177176	0.00144394	0.00704132	-0.000233381	0.000667268	1.71896e-05	0.844962	0.352621	0.80971	0.10639	0.551673	0.869312	0.626188	0.924157	0.39766	0.761431
A5.1248	A5	1	[681921 682242]	[681921 682277]	-	AT1G02990	0.105679	-0.0237696	0.135427	0.00764314	-0.00185928	-0.000245727	0.290111	4.22588e-09	0.00955269	0.139271	0.00516766	0.33006	8.54638e-08	0.0584741	0.458291	0.0351307
A5.1249	A5	1	[682892 683022]	[682892 683174]	-	AT1G02990	0.00461417	0.943874	0.0277881	-0.00108405	-0.00144837	5.42704e-05	0	0.0763557	0.588934	0.0904149	0.363907	0	0.235214	0.799569	0.364373	0.615458
A5.1253	A5	1	[689813 689980]	[689813 689984]	-	AT1G03000	0.287552	0.679128	0.297746	-0.00268451	-0.000637128	0.000130739	7.5382e-187	1.24986e-35	0.37995	0.625063	0.151264	3.1906e-186	1.57208e-33	0.642598	0.869933	0.373873
A5.1254	A5	1	[690579 690756]	[690579 690748]	-	AT1G03000	0.00996252	0.0595785	-0.00290258	0.000875783	0.000804068	2.64337e-06	0.000221632	0.860785	0.679175	0.373183	0.966581	0.000337583	0.955262	0.855949	0.71193	0.99619
A5.19	A5	1	[702745 702827]	[702737 702827]	+	AT1G03030	0.00449274	0.961952	0.0106059	0.00139944	-0.000382074	-2.73199e-05	0	0.335136	0.32022	0.524483	0.514872	0	0.608652	0.590337	0.815198	0.734835
A5.885	A5	1	[762391 762509]	[762414 762509]	+	AT1G03160_and_AT1G03165_and_AT1G03170	0.435922	0.114533	0.43434	-0.00292285	9.8856e-05	0.000163756	7.25062e-05	1.04166e-48	0.440427	0.951206	0.146884	0.000113341	2.08403e-46	0.694155	0.997109	0.367857
A5.888	A5	1	[762578 763012]	[762628 763012]	+	AT1G03160_and_AT1G03165_and_AT1G03170	0.430822	0.154184	0.453127	-0.00226225	-0.00139408	5.85822e-05	7.53315e-08	1.48815e-53	0.547722	0.384944	0.601332	1.343e-07	3.49305e-51	0.771552	0.720577	0.795743
A5.886	A5	1	[764066 764156]	[764061 764156]	+	AT1G03160_and_AT1G03165_and_AT1G03170	0.00549205	0.033687	0.0128696	-0.00124445	-0.000461099	1.13773e-05	5.06971e-16	0.0025275	0.0224595	0.0473236	0.483704	1.10595e-15	0.0159366	0.109355	0.25229	0.711233
A5.887	A5	1	[764831 765024]	[764866 765024]	+	AT1G03160_and_AT1G03165_and_AT1G03170	0.0050258	0.972604	0.0236524	-0.00114843	-0.00116416	3.24074e-05	0	0.00285931	0.257692	0.0071277	0.283736	0	0.0176545	0.524929	0.0727162	0.542873
A5.889	A5	1	[764866 765024]	[764931 765024]	+	AT1G03160_and_AT1G03165_and_AT1G03170	0.00508643	0.00298373	0.000370285	-0.000360832	0.000294759	2.21441e-05	0.61024	0.950832	0.638608	0.368261	0.333383	0.649331	0.989578	0.832007	0.707565	0.586011
A5.891	A5	1	[765255 765484]	[765266 765484]	+	AT1G03160_and_AT1G03165_and_AT1G03170	0.0901179	0.0115083	0.0719363	-0.00180367	0.00113635	5.56061e-05	0.353574	1.58268e-08	0.267986	0.101697	0.251736	0.396138	2.93954e-07	0.535588	0.388168	0.506942
A5.24	A5	1	[777237 777335]	[777241 777335]	+	AT1G03190	0.0042222	0.027637	0.00582452	-0.00318364	-0.000100145	8.95214e-05	0.00981432	0.595777	0.023431	0.867221	0.0324506	0.0132281	0.810594	0.112807	0.968162	0.136407
A5.892	A5	1	[781172 782925]	[781177 782925]	+	AT1G03200_and_AT1G03210	0.0186271	0.965233	0.0324339	0.000658048	-0.000862924	1.21216e-05	0	0.000597121	0.586173	0.0940917	0.73645	0	0.00462222	0.797891	0.372623	0.880894
A5.1256	A5	1	[794410 794541]	[794410 794505]	-	AT1G03250	0.00939017	0.0219138	0.00570009	-0.0026047	0.00023063	7.63106e-05	5.84373e-06	0.250526	4.06001e-05	0.394093	5.45126e-05	9.65106e-06	0.516937	0.000691199	0.726645	0.000857078
A5.1257	A5	1	[797411 797545]	[797411 797542]	-	AT1G03260	0.0106227	0.0105643	0.000399587	-0.00118438	0.000638942	3.09872e-05	0.0767798	0.947977	0.13064	0.0558228	0.18441	0.0944149	0.988337	0.352402	0.277196	0.421666
A5.25	A5	1	[801039 801184]	[801049 801184]	+	AT1G03270	0.0536201	0.000411915	-0.0170838	0.0086036	0.00350318	-0.000278747	0.991117	0.737147	0.106121	0.164537	0.0861305	1	0.894211	0.311518	0.49594	0.264124
A5.26	A5	1	[807510 807950]	[807631 807950]	+	AT1G03290	0.0606628	0.209865	0.00101624	0.0132269	0.00372791	-0.000465463	4.80338e-11	0.975235	0.00158811	0.036849	0.000191557	9.4104e-11	0.999991	0.0147989	0.215326	0.00249033
A5.893	A5	1	[813581 813928]	[813604 813928]	+	AT1G03310_and_AT1G03320	0.474591	0.461267	0.457167	0.00881495	0.00108902	-0.000269949	5.94086e-52	1.31332e-48	0.0272361	0.522327	0.0232379	1.80951e-51	2.61e-46	0.125372	0.814149	0.106968
A5.894	A5	1	[825487 825586]	[825481 825586]	+	AT1G03360_and_AT1G03365	0.0314299	0.0129688	0.0360646	-0.00192138	-0.000289666	5.87719e-05	0.0259606	1.57874e-09	0.011954	0.374177	0.00986967	0.0335552	3.38578e-08	0.0691196	0.712593	0.0575691
A5.895	A5	1	[837908 838068]	[837950 838068]	+	AT1G03380_and_AT1G03395	0.0208728	0.0649789	0.0429567	-0.00350947	-0.00138024	4.76362e-05	5.91037e-15	4.90288e-07	0.00131821	0.00305082	0.143402	1.26499e-14	7.38155e-06	0.012746	0.0395757	0.362396
A5.1261	A5	1	[867511 867625]	[867511 867629]	-	AT1G03470	0.00344119	0.968905	0.0137708	0.00152351	-0.0006456	-3.86156e-05	0	0.187216	0.254101	0.257058	0.331975	0	0.429401	0.520888	0.605831	0.584421
A5.1260	A5	1	[867520 867629]	[867520 867625]	-	AT1G03470	0.0468556	-0.0108358	0.0418595	0.00235106	0.000312254	-6.93999e-05	0.74651	0.223528	0.593104	0.867814	0.596547	0.778392	0.481563	0.802088	0.968227	0.792542
A5.1262	A5	1	[887635 889427]	[887635 887724]	-	AT1G03550	0.00582474	0.914956	0.0213458	0.00780885	-0.000970063	-0.00021371	0	0.253116	0.00108435	0.341101	0.00268746	0	0.520134	0.0108545	0.685699	0.0209728
A5.1263	A5	1	[896482 897221]	[896482 897355]	-	AT1G03590	0.00273525	0.976652	0.00251647	-0.00173421	1.36739e-05	5.46117e-05	0	0.762126	0.103014	0.975948	0.0848583	0	0.907188	0.30552	1	0.261379
A5.1265	A5	1	[905784 905910]	[905784 905942]	-	AT1G03620	0.0315161	0.969007	0.00239135	0.00163111	0.0016168	-8.91469e-05	0	0.908489	0.490283	0.109681	0.185897	0	0.974209	0.731305	0.403616	0.423692
A5.27	A5	1	[947001 947122]	[947019 947122]	+	AT1G03770	0.0400016	0.0164612	0.021592	-0.00172512	0.0011506	6.08766e-05	0.142321	0.0606632	0.241407	0.0668922	0.165311	0.169209	0.199511	0.506281	0.308677	0.39436
A5.1268	A5	1	[965736 965822]	[965736 965827]	-	AT1G03830	0.029237	0.126062	-0.0071847	-0.0076811	0.00227636	0.00018731	5.79965e-06	0.801149	0.0353286	0.143543	0.0849869	9.57933e-06	0.928439	0.150688	0.464203	0.261694
A5.1269	A5	1	[968568 968927]	[968568 969314]	-	AT1G03840	0.00730589	0.95243	0.0156559	0.00121557	-0.000447343	-1.02468e-08	0	0.2963	0.530064	0.586972	0.999856	0	0.568971	0.75971	0.84953	1
A5.1273	A5	1	[976501 977279]	[976501 977367]	-	AT1G03850	0.00472901	0.916571	-0.0205039	-0.00743245	0.00157705	0.000271921	1.29876e-142	0.579286	0.116222	0.434407	0.0537563	5.13611e-142	0.800064	0.32874	0.755506	0.193466
A5.1274	A5	1	[981160 981562]	[981160 981772]	-	AT1G03860	0.000270239	0.997019	-0.000766949	4.71528e-05	6.48243e-05	-6.08482e-06	0	0.600057	0.801075	0.416599	0.275178	0	0.813004	0.920304	0.742781	0.533878
A5.29	A5	1	[993631 993705]	[993612 993705]	+	AT1G03905	0.0642898	0.375015	-0.168134	-0.0200204	0.0129359	0.000331172	1.89176e-08	0.013661	0.0124671	0.000149683	0.144281	3.44428e-08	0.0642224	0.0715529	0.00353851	0.363662
A5.30	A5	1	[993951 994045]	[993631 994045]	+	AT1G03905	0.0510606	0.886131	-0.0134946	0.0178512	0.0040347	-0.00104328	2.36056e-101	0.751036	0.00103659	0.0820671	1.23969e-10	8.55645e-101	0.901521	0.0104606	0.344703	7.54185e-09
A5.28	A5	1	[994632 994827]	[994702 994827]	+	AT1G03905	0.0268556	0.0347596	-0.0320189	-0.00250652	0.00367966	9.13737e-05	0.000883743	0.00282984	0.0677302	3.1874e-10	0.0254143	0.0012959	0.017527	0.233901	3.34564e-08	0.114205
A5.897	A5	1	[996939 997176]	[997060 997176]	+	AT1G03910_and_AT1G03920_and_AT1G03930	0.00301228	0.00610881	0.00833445	-0.000250748	-0.000332635	2.98384e-06	0.00712298	0.000345188	0.400034	0.00884035	0.736794	0.0097179	0.00285597	0.659495	0.0850042	0.881127
A5.896	A5	1	[997489 997603]	[997499 997603]	+	AT1G03910_and_AT1G03920_and_AT1G03930	0.0197634	0.0113663	0.00313348	-0.00125678	0.00103937	4.03413e-05	0.000723861	0.363678	0.00440415	3.33103e-08	0.00215653	0.00106813	0.636736	0.0325067	2.27748e-06	0.0175934
A5.31	A5	1	[1016179 1016339]	[1016226 1016339]	+	AT1G03960	0.0847672	0.675037	0.110081	0.0010702	-0.0015821	0.000284417	1.79516e-142	5.35349e-05	0.758874	0.287226	0.00618288	7.09826e-142	0.000544296	0.899782	0.638143	0.0405526
A5.1277	A5	1	[1027564 1027898]	[1027564 1028207]	-	AT1G04000	0.0813053	0.833562	0.156399	0.00279242	-0.00448003	8.56137e-05	1.18572e-182	4.48138e-08	0.449441	0.00433576	0.430256	4.98397e-182	7.86285e-07	0.701235	0.0509692	0.671831
A5.1276	A5	1	[1027564 1028207]	[1027564 1027918]	-	AT1G04000	0.106959	0.0901347	0.0449985	0.0205703	0.00419819	-0.000592271	0.290682	0.581858	0.0467416	0.334641	0.0466152	0.330671	0.801587	0.182849	0.680751	0.175499
A5.2194	A5	1	[276519 276705]	[276519 276607]	-	AT1G04053_and_AT1G01760	0.0455744	-0.000953338	0.0414292	0.00475195	0.000259075	-0.00012753	0.968237	0.0916495	0.130485	0.846686	0.173181	0.981873	0.265553	0.352014	0.961415	0.405509
A5.2197	A5	1	[276519 276622]	[276519 276705]	-	AT1G04053_and_AT1G01760	0.268766	0.600467	0.239808	0.00552225	0.00180987	-0.000188798	2.79896e-40	2.31604e-07	0.35191	0.474298	0.285459	7.94034e-40	3.65878e-06	0.617376	0.781706	0.544994
A5.2196	A5	1	[277606 277716]	[277606 277734]	-	AT1G04053_and_AT1G01760	0.0346084	0.275257	0.0806622	-0.00600369	-0.00287837	-1.29879e-05	4.7024e-11	0.060167	0.274201	0.218911	0.936723	9.21439e-11	0.198441	0.54288	0.561547	0.982676
A5.898	A5	1	[1053187 1053326]	[1052775 1053326]	+	AT1G04080_and_AT1G04090_and_AT1G04100	0.0410554	0.911447	0.0355573	-0.00688914	0.000343631	0.00022171	0	0.000133845	7.30813e-09	0.498679	4.18412e-10	0	0.00124142	3.44163e-07	0.798538	2.28799e-08
A5.899	A5	1	[1054528 1054662]	[1054555 1054662]	+	AT1G04080_and_AT1G04090_and_AT1G04100	0.0832655	0.453386	0.146489	0.019314	-0.00267437	-0.000336734	6.79422e-05	0.132289	0.10342	0.569087	0.275322	0.000106424	0.342054	0.306283	0.840081	0.533985
A5.902	A5	1	[1060634 1060731]	[1060549 1060731]	+	AT1G04080_and_AT1G04090_and_AT1G04100	0.0272097	0.0327909	-0.0354041	-0.00596197	0.00391336	0.000186312	0.34217	0.317457	0.188238	0.042815	0.167576	0.384517	0.590908	0.438012	0.237126	0.397664
A5.1279	A5	1	[1076010 1076135]	[1076010 1076118]	-	AT1G04140	0.0162549	0.198904	-0.0104085	0.000476459	0.00166646	-0.000176148	3.47291e-94	0.293631	0.707107	0.00205555	3.12851e-06	1.23482e-93	0.56585	0.869912	0.0292766	7.09207e-05
A5.32	A5	1	[1089505 1089911]	[1089494 1089911]	+	AT1G04160	0.0404226	0.787647	-0.0630411	0.0146674	0.00628128	-0.00071326	1.75208e-18	0.4937	0.215666	0.21847	0.0435323	3.99461e-18	0.741159	0.47394	0.561043	0.167164
A5.33	A5	1	[1097120 1097398]	[1097286 1097398]	+	AT1G04170	0.000596783	0.00290981	0.000493704	-0.00031423	6.44244e-06	1.18486e-05	0.0416331	0.736178	0.0937225	0.935768	0.0339132	0.0527111	0.893819	0.288206	0.992659	0.140215
A5.34	A5	1	[1116961 1117052]	[1116964 1117052]	+	AT1G04210	0.000752626	0.0110671	0.0045156	0.00156499	-0.000235186	-3.81411e-05	0.11199	0.527321	0.0868469	0.546199	0.161349	0.134885	0.763709	0.273987	0.82839	0.388847
A5.2204	A5	1	[1142100 1142578]	[1142100 1142575]	-	AT1G04260_and_AT1G04270	0.000146529	0.999953	0.000114739	-1.39013e-05	1.98685e-06	3.20704e-07	0	0.221093	0.246569	0.697725	0.369627	0	0.478181	0.512246	0.90205	0.62059
A5.2206	A5	1	[1146374 1146522]	[1146374 1146463]	-	AT1G04280_and_AT1G04310_and_AT1G04290_and_AT1G04300	0.00642434	0.00687687	0.00830813	0.000316804	-0.000117737	-4.89617e-06	0.0189887	0.0057374	0.410329	0.473017	0.669343	0.0248881	0.0317548	0.668357	0.781001	0.842082
A5.2205	A5	1	[1157139 1157545]	[1157139 1157650]	-	AT1G04280_and_AT1G04310_and_AT1G04290_and_AT1G04300	0.232214	0.339354	0.387774	0.0133443	-0.00972247	-0.000391004	3.55898e-16	1.07819e-19	0.0145875	3.00086e-05	0.016309	7.78665e-16	5.93005e-18	0.080187	0.000899956	0.0833913
A5.36	A5	1	[1198326 1198787]	[1198322 1198787]	+	AT1G04430	0.0264516	0.0113513	0.0227193	-0.00137307	0.000233271	4.31166e-05	0.00106239	1.69928e-10	0.0025551	0.229383	0.00147619	0.0015494	4.05245e-09	0.0213235	0.574446	0.0130193
A5.41	A5	1	[1198637 1198787]	[1198326 1198787]	+	AT1G04430	0.00462108	0.98451	0.0123773	0.000479754	-0.000484765	1.46033e-06	0	9.93939e-09	0.0824799	3.87302e-05	0.859196	0	1.90298e-07	0.264607	0.00112503	0.945744
A5.38	A5	1	[1198326 1198787]	[1198681 1198787]	+	AT1G04430	0.00537432	0.0021263	0.0071102	-0.000214619	-0.000108493	6.25279e-06	0.159257	4.47482e-06	0.279063	0.199402	0.289871	0.188129	5.64513e-05	0.548267	0.536301	0.549536
A5.1280	A5	1	[1330346 1330507]	[1330346 1330473]	-	AT1G04730	0.0136813	0.943544	0.0407606	0.00412585	-0.0018415	-6.87053e-05	0	0.0294491	0.0885393	0.0966302	0.363852	0	0.117301	0.277302	0.378141	0.615435
A5.1281	A5	1	[1332730 1332848]	[1332730 1333236]	-	AT1G04750	0.000139397	0.997107	0.0011531	0.000115303	-6.33566e-05	-3.64999e-06	0	0.162876	0.275434	0.159891	0.246572	0	0.392332	0.543827	0.489803	0.5006
A5.44	A5	1	[1347615 1347704]	[1347620 1347704]	+	AT1G04790	0.0552886	0.0729212	0.0538684	-0.009916	8.87626e-05	0.000544913	0.00134923	0.0209967	0.000897792	0.944423	9.09591e-10	0.00195435	0.0902931	0.00931866	0.994759	4.61923e-08
A5.45	A5	1	[1347804 1347898]	[1347815 1347898]	+	AT1G04790	0.105752	0.077511	0.118744	-0.00149705	-0.000811979	-3.41114e-05	5.81633e-05	1.93431e-09	0.554146	0.451769	0.650992	9.14092e-05	4.0924e-08	0.775435	0.767539	0.830081
A5.2207	A5	1	[1359899 1360224]	[1359899 1360027]	-	AT1G04820_and_AT1G04830	0.0571318	0.0553717	-0.00935038	0.00611914	0.00415514	-0.000192032	0.000122209	0.52716	0.00121864	2.5927e-07	0.000657519	0.000188808	0.763625	0.0119935	1.42074e-05	0.00682949
A5.2208	A5	1	[1360536 1360679]	[1360536 1360654]	-	AT1G04820_and_AT1G04830	0.00682526	0.00113762	0.00715322	0.000349636	-2.04973e-05	-1.29266e-05	0.793989	0.109481	0.540896	0.933003	0.448019	0.822233	0.300381	0.766821	0.991993	0.685176
A5.2253	A5	1	[3979210 3980100]	[3979210 3980053]	-	AT1G04887_and_AT1G11780_and_AT1G11785	0.0562993	0.0764239	-0.0666793	-0.0108431	0.00768616	0.000451739	0.263655	0.341784	0.226938	0.0445727	0.0911295	0.301803	0.615067	0.488803	0.24322	0.274068
A5.2254	A5	1	[3980258 3980928]	[3980258 3980872]	-	AT1G04887_and_AT1G11780_and_AT1G11785	0.00959431	0.0207805	0.00629619	-0.00389739	0.000206133	0.000201176	0.176887	0.690024	0.0536575	0.81084	0.000829317	0.207664	0.869214	0.201123	0.950183	0.00825716
A5.47	A5	1	[1385765 1386108]	[1385770 1386108]	+	AT1G04900	0.318423	0.0338482	0.206866	-0.000973522	0.00697232	8.75376e-05	0.32306	3.93426e-09	0.828568	0.000275797	0.51345	0.36476	7.99457e-08	0.933611	0.00595762	0.734133
A5.46	A5	1	[1386569 1386640]	[1386561 1386640]	+	AT1G04900	0.183955	0.00483904	0.173624	0.00403219	0.000645671	-0.000125746	0.865396	3.05792e-09	0.281875	0.686123	0.260033	0.887639	6.31279e-08	0.55114	0.896133	0.516772
A5.2209	A5	1	[1390334 1390425]	[1390334 1390450]	-	AT1G04930_and_AT1G04910_and_AT1G04920	0.0222615	0.886536	0.0231311	-0.00619416	-5.43535e-05	0.000138093	0	0.200228	0.00734117	0.956002	0.0448594	0	0.448313	0.0479388	0.998578	0.170581
A5.2210	A5	1	[1396627 1396785]	[1396627 1396796]	-	AT1G04930_and_AT1G04910_and_AT1G04920	0.013833	0.0878074	-0.0159688	0.000860662	0.00186262	-3.87694e-05	8.98181e-09	0.308148	0.667697	0.0293368	0.51631	1.65012e-08	0.580942	0.849041	0.187426	0.735646
A5.1282	A5	1	[1406958 1407058]	[1406958 1407154]	-	AT1G04950	0.00994526	0.0446959	-0.0235144	-0.00573024	0.00209123	0.000188669	0.0135273	0.205354	0.0158569	0.0389668	0.00768618	0.0180062	0.455397	0.085509	0.223396	0.0478137
A5.1287	A5	1	[1407205 1407285]	[1407205 1407428]	-	AT1G04950	0.00409235	1.00051	-0.00235737	-0.000211799	0.000403108	-1.79723e-05	0	0.647775	0.748345	0.152145	0.360891	0	0.84435	0.894164	0.478321	0.612686
A5.1285	A5	1	[1407205 1407428]	[1407205 1407298]	-	AT1G04950	0.0579581	0.0432393	-0.0265619	-0.00753556	0.0052825	0.000271997	0.00893831	0.117469	0.000517923	1.15067e-08	2.60828e-05	0.0120889	0.314482	0.00585486	8.72813e-07	0.00044892
A5.1283	A5	1	[1407205 1407428]	[1407205 1407313]	-	AT1G04950	0.0241107	0.0461847	-0.00493595	-0.00784517	0.00181542	0.000334572	0.00299451	0.757149	0.000122306	0.0370932	3.83435e-08	0.00422302	0.904271	0.00177476	0.216347	1.41288e-06
A5.2211	A5	1	[1416978 1417325]	[1416978 1417973]	-	AT1G04985_and_AT1G04990	0.098596	0.685406	0.12725	-0.00122667	-0.0017909	4.30112e-05	1.54956e-185	1.46312e-07	0.692031	0.175028	0.641123	6.54468e-185	2.38598e-06	0.862837	0.50354	0.823438
A5.2212	A5	1	[1419658 1419846]	[1419658 1419786]	-	AT1G04985_and_AT1G04990	0.0047553	0.987025	0.00838767	0.000538877	-0.000227023	-6.32168e-06	0	0.000921565	0.096141	0.100195	0.512406	0	0.0067399	0.292569	0.385283	0.733309
A5.2215	A5	1	[1439304 1439501]	[1439304 1439490]	-	AT1G05030_and_AT1G05040_and_AT1G04313	0.248674	0.298698	0.206673	-0.00748538	0.00262504	0.000176454	4.5747e-32	1.87309e-15	0.0244249	0.0641984	0.0750092	1.2175e-31	7.4054e-14	0.116162	0.301558	0.241107
A5.2213	A5	1	[1440646 1441002]	[1440646 1441049]	-	AT1G05030_and_AT1G05040_and_AT1G04313	0.0460733	0.0607365	-0.00921786	0.00462915	0.0034557	-0.0002022	0.0271909	0.743851	0.199637	0.0247397	0.0600766	0.0350709	0.898177	0.453113	0.169203	0.208776
A5.1290	A5	1	[1457518 1457617]	[1457518 1457599]	-	AT1G05070	0.0749482	0.019209	0.0616931	0.00123621	0.000828444	-5.15936e-05	0.0979979	2.21861e-07	0.4172	0.202291	0.255796	0.118898	3.51605e-06	0.674394	0.54047	0.511569
A5.51	A5	1	[1505153 1505560]	[1505462 1505560]	+	AT1G05200	0.0041148	0.00243269	0.00122854	0.00113034	0.000180392	-4.3078e-05	0.607507	0.800389	0.0690215	0.496167	0.0200346	0.646755	0.928391	0.236874	0.796974	0.0967036
A5.52	A5	1	[1508437 1508528]	[1508433 1508528]	+	AT1G05200	0.0901693	0.979438	0.00878807	-0.00539431	0.00508633	-4.21767e-05	0	0.601137	0.0121397	2.92121e-08	0.510446	0	0.813832	0.0699428	2.02987e-06	0.731805
A5.54	A5	1	[1508433 1508528]	[1508446 1508528]	+	AT1G05200	0.00495795	0.0148219	-0.00404529	-0.000314635	0.000562703	1.96472e-05	0.125379	0.683477	0.804241	0.298528	0.603442	0.150132	0.86512	0.921845	0.64997	0.79712
A5.2277	A5	1	[5483516 5483587]	[5483516 5483595]	-	AT1G05213_and_AT1G15960	0.0336706	0.0178845	-0.00829532	-0.00239258	0.00262287	0.000112878	0.46051	0.738631	0.451929	0.0531293	0.233639	0.504921	0.895005	0.703205	0.269223	0.485282
A5.2280	A5	1	[5483956 5484075]	[5483956 5484068]	-	AT1G05213_and_AT1G15960	0.105557	0.219276	0.15861	0.0172971	-0.00331581	-0.000677799	0.00140413	0.0243307	0.0549284	0.388179	0.0115914	0.00203081	0.101398	0.20437	0.722496	0.0647804
A5.2279	A5	1	[5483956 5484075]	[5483956 5484139]	-	AT1G05213_and_AT1G15960	0.0478185	0.0579372	0.00150533	-0.000125351	0.00288413	3.93343e-05	0.171593	0.972918	0.982347	0.224284	0.817691	0.201767	0.998851	1	0.567806	0.9245
A5.2218	A5	1	[1513744 1513824]	[1513744 1513830]	-	AT1G05230_and_AT1G04357_and_AT1G04367	0.909586	0.02475	0.899109	-0.00131563	0.000654798	3.3925e-05	0.118162	0	0.526858	0.460131	0.583931	0.141918	0	0.757184	0.772864	0.783851
A5.2224	A5	1	[1517057 1518180]	[1517057 1517148]	-	AT1G05230_and_AT1G04357_and_AT1G04367	0.0296048	-0.0164625	0.0272153	0.0050988	0.000149348	-0.000170876	0.263461	0.0715477	0.00832173	0.856162	0.00299811	0.301604	0.224743	0.0524906	0.963865	0.0228636
A5.2220	A5	1	[1517057 1518180]	[1517057 1517175]	-	AT1G05230_and_AT1G04357_and_AT1G04367	0.00951797	0.045503	0.0255523	-0.00462508	-0.00100215	0.000109013	1.85846e-05	0.0191061	0.000915166	0.092043	0.00872511	3.00199e-05	0.08377	0.0094759	0.368395	0.0525011
A5.2219	A5	1	[1517057 1518180]	[1517057 1518144]	-	AT1G05230_and_AT1G04357_and_AT1G04367	0.0794088	0.100407	0.0938673	0.00331369	-0.000903656	-0.000140153	0.0143055	0.0256053	0.537962	0.693658	0.381971	0.0189868	0.105355	0.764706	0.899745	0.631639
A5.1291	A5	1	[1532130 1532263]	[1532130 1532259]	-	AT1G05270	0.0128395	0.0114139	-0.0030304	-0.00134977	0.000991871	4.5782e-05	0.000374763	0.357255	0.00135074	3.32659e-08	0.000263862	0.000563373	0.630127	0.0129973	2.27748e-06	0.00323671
A5.1292	A5	1	[1532834 1532916]	[1532834 1532912]	-	AT1G05270	0.00812209	0.00369934	0.00382417	-0.00020672	0.00026862	5.81047e-06	0.154031	0.150906	0.543942	0.0644014	0.566991	0.18231	0.373785	0.768691	0.301809	0.772557
A5.55	A5	1	[1553759 1554812]	[1553949 1554812]	+	AT1G05320	0.00236124	-0.0132663	0.00421328	0.00283728	-0.000115753	-7.47878e-05	0.0720707	0.577648	0.00338081	0.779161	0.00952092	0.0888809	0.799058	0.0265146	0.937671	0.055991
A5.56	A5	1	[1553949 1554821]	[1553759 1554821]	+	AT1G05320	0.0181549	0.996086	0.0210466	-0.00507264	-0.000182831	0.000162787	0	0.272912	0.0417023	0.863926	0.0285873	0	0.543193	0.168981	0.966879	0.124736
A5.57	A5	1	[1577127 1577221]	[1577148 1577221]	+	AT1G05380	0.0316681	0.826063	0.0150657	0.000597332	0.00103765	6.0617e-05	2.46367e-127	0.669561	0.894788	0.590043	0.652411	9.45808e-127	0.857152	0.964409	0.850731	0.830994
A5.58	A5	1	[1584588 1584680]	[1584581 1584680]	+	AT1G05400	0.290756	0.145543	0.0700563	-0.00569612	0.0136994	0.000105142	0.0496241	0.341348	0.543439	0.000564703	0.702261	0.0623201	0.614808	0.768691	0.0105673	0.861404
A5.1294	A5	1	[1604677 1604889]	[1604677 1604885]	-	AT1G05460	0.0557303	0.00473853	0.0204753	-0.000380702	0.00220344	1.87313e-05	0.849752	0.424937	0.907689	0.115507	0.848153	0.873698	0.690546	0.969318	0.415251	0.940469
A5.1296	A5	1	[1658699 1658806]	[1658699 1659255]	-	AT1G05570	0.00434764	0.978187	-0.000404073	-0.000335934	0.000296982	-1.08884e-06	0	0.942104	0.636981	0.327861	0.959057	0	0.986308	0.830893	0.675365	0.992836
A5.65	A5	1	[1715842 1716195]	[1715384 1716195]	+	AT1G05710	0.0042083	0.9912	0.00055062	0.000465497	0.000228605	-1.3623e-05	0	0.925907	0.538892	0.479116	0.546138	0	0.979674	0.765407	0.785483	0.757623
A5.59	A5	1	[1715384 1716195]	[1716080 1716195]	+	AT1G05710	0.0174943	0.0578802	0.0192483	-0.00139474	-0.000109626	3.16238e-06	2.20168e-05	0.168965	0.435954	0.885814	0.952727	3.54365e-05	0.402773	0.690201	0.975692	0.989954
A5.62	A5	1	[1715384 1716195]	[1716102 1716195]	+	AT1G05710	0.000873674	0.0190086	-0.00507744	0.000929159	0.000371944	-2.54985e-05	0.119644	0.685326	0.562201	0.586372	0.593478	0.143617	0.866793	0.781097	0.849395	0.789873
A5.66	A5	1	[1731385 1731466]	[1731365 1731466]	+	AT1G05785	0.0802071	0.0259221	0.0594092	-0.00224644	0.00129987	5.52782e-05	0.121992	0.00055074	0.307226	0.16587	0.39909	0.14627	0.00430907	0.578293	0.497394	0.646644
A5.67	A5	1	[1733892 1734113]	[1733997 1734113]	+	AT1G05790	0						1	1	1	1	1	1	1	1	1	1
A5.72	A5	1	[1733997 1734113]	[1733998 1734113]	+	AT1G05790	0.00241518	0.00633423	0.00885991	-0.00116961	-0.000402796	4.79638e-05	0.361641	0.213582	0.199373	0.299971	0.0773481	0.40431	0.466746	0.45286	0.651058	0.245946
A5.69	A5	1	[1733997 1734113]	[1734001 1734113]	+	AT1G05790	0.382837	0.0384912	0.122391	-0.00529037	0.0162778	0.000181904	0.121807	1.62206e-06	0.105192	1.41445e-31	0.0615279	0.146066	2.21805e-05	0.309683	2.44993e-28	0.21182
A5.68	A5	1	[1734971 1735111]	[1734957 1735111]	+	AT1G05790	0.0830395	0.937596	0.0235639	0.000773394	0.00371723	-0.000143782	0	0.0704468	0.642595	1.68572e-07	0.00378441	0	0.222271	0.834092	9.60827e-06	0.0274886
A5.905	A5	1	[1747440 1749027]	[1748776 1749027]	+	AT1G05805_and_AT1G05810_and_AT1G05820	0.0894084	0.313553	0.0354701	-0.017129	0.00337114	0.000760702	5.75669e-14	0.40739	0.00176509	0.148919	3.14716e-06	1.20561e-13	0.675622	0.0161221	0.47312	7.10804e-05
A5.906	A5	1	[1752230 1752502]	[1752249 1752502]	+	AT1G05805_and_AT1G05810_and_AT1G05820	0.0904407	0.0329431	0.0196346	0.00313356	0.00442538	-0.000145715	0.535024	0.718542	0.653019	0.13649	0.482909	0.576548	0.885552	0.840087	0.45466	0.710605
A5.74	A5	1	[1757136 1757226]	[1757144 1757226]	+	AT1G05830	0.0954236	0.844972	0.0846555	0.00120878	0.000673004	-1.96122e-05	0	3.27102e-06	0.603554	0.497735	0.77735	0	4.21935e-05	0.809255	0.797908	0.903466
A5.75	A5	1	[1758992 1759114]	[1759022 1759114]	+	AT1G05830	0.052207	0.0208924	0.0534149	0.00274606	-7.54969e-05	-2.16563e-05	0.166073	0.000557637	0.165483	0.928748	0.713563	0.195669	0.00435731	0.406313	0.990653	0.867332
A5.1300	A5	1	[1768151 1768547]	[1768151 1768262]	-	AT1G05850	2.16592e-05	0.000430564	7.19586e-06	-2.26578e-05	9.0396e-07	6.83247e-07	0.00184011	0.95953	0.211724	0.906981	0.206265	0.00263873	0.993781	0.468697	0.982313	0.451053
A5.1301	A5	1	[1772141 1772308]	[1772141 1772355]	-	AT1G05870	0.102709	0.120213	0.115034	0.00285618	-0.000770336	-7.47781e-05	2.65807e-05	8.91012e-05	0.446991	0.630519	0.504012	4.26143e-05	0.000863213	0.699354	0.872032	0.727195
A5.907	A5	1	[1782544 1782649]	[1782540 1782649]	+	AT1G05890_and_AT1G05894	0.0235586	0.00893991	0.0116353	-0.000941199	0.000745206	3.25135e-05	0.0155086	0.00213719	0.0522191	0.000312468	0.0244016	0.0205034	0.0138229	0.197538	0.00659211	0.110987
A5.76	A5	1	[1787941 1788221]	[1787910 1788221]	+	AT1G05900	0.0254199	0.946407	-0.033225	-0.0014975	0.0036653	-7.75443e-05	0	0.160902	0.621367	0.00458032	0.39068	0	0.38923	0.821522	0.0530249	0.639197
A5.1302	A5	1	[1802260 1802356]	[1802260 1802346]	-	AT1G05940	0.0254579	0.0137261	0.012202	-0.00137201	0.000828494	5.42134e-05	0.0201963	0.0441516	0.0769236	0.0122474	0.0189897	0.0264035	0.158784	0.252822	0.106159	0.0929262
A5.1303	A5	1	[1804882 1804951]	[1804882 1804962]	-	AT1G05950	0.240408	0.322767	0.200295	-0.00904951	0.00250705	0.00030236	3.95211e-07	0.00215824	0.278691	0.481552	0.224469	6.86033e-07	0.0139409	0.547861	0.787399	0.474636
A5.1304	A5	1	[1805584 1805666]	[1805584 1805725]	-	AT1G05950	0.142166	0.209738	0.138673	-0.0157925	0.000218315	0.000370562	2.07864e-07	0.000819149	0.00289616	0.923072	0.0189943	3.64968e-07	0.00607132	0.0235565	0.98883	0.0929262
A5.908	A5	1	[1823410 1823497]	[1823385 1823497]	+	AT1G06010_and_AT1G06020_and_AT1G06030	0.00302708	0.0230215	-0.00187818	-0.00099512	0.000306579	4.42532e-05	2.14105e-12	0.576397	0.0206946	0.0946134	0.000554544	4.33092e-12	0.798102	0.103525	0.373764	0.00596785
A5.1305	A5	1	[1837144 1837423]	[1837144 1837427]	-	AT1G06070	0.0444748	0.886781	0.0830027	0.00237739	-0.00240799	1.63303e-05	0	2.99342e-05	0.350083	0.0264435	0.829441	0	0.000322125	0.615402	0.175564	0.930759
A5.1307	A5	1	[1893626 1893738]	[1893626 1894032]	-	AT1G06190	0.00129566	0.994726	0.00214945	0.000123922	-5.33617e-05	-4.90301e-06	0	0.117947	0.48111	0.476795	0.34952	0	0.315422	0.72463	0.78359	0.602022
A5.77	A5	1	[1900157 1900296]	[1900107 1900296]	+	AT1G06220	0.00637556	0.961863	0.0105961	0.00220181	-0.000263781	-5.84312e-05	0	0.498937	0.272125	0.757667	0.328022	0	0.744373	0.540875	0.929238	0.580592
A5.909	A5	1	[1910222 1910430]	[1910227 1910430]	+	AT1G06230_and_AT1G06240	0.0415979	0.928126	0.0676885	0.00117624	-0.00163066	2.16895e-05	0	3.01287e-28	0.134408	1.13336e-06	0.354229	0	2.7299e-26	0.358927	5.26255e-05	0.606591
A5.2226	A5	1	[1917651 1917786]	[1917651 1917782]	-	AT1G06265_and_AT1G06270	0.0348128	0.832818	0.000795936	0.00138694	0.00212606	-9.63477e-05	4.92434e-28	0.991841	0.889232	0.616582	0.745393	1.26329e-27	1	0.961794	0.864981	0.886332
A5.78	A5	1	[1955031 1955355]	[1954897 1955355]	+	AT1G06410	0.012863	0.938644	0.0132852	-0.00200273	-2.63855e-05	8.80456e-05	0	0.0396056	0.0153214	0.940281	0.000346815	0	0.146264	0.0831935	0.993854	0.00406869
A5.79	A5	1	[1969879 1970423]	[1969883 1970423]	+	AT1G06470	0.138063	0.419268	0.082415	0.00716496	0.00347802	-0.000256766	1.32314e-49	0.00455269	0.0538764	0.0281878	0.0204129	3.97809e-49	0.0261734	0.201614	0.182431	0.0979884
A5.81	A5	1	[1970997 1971082]	[1971001 1971082]	+	AT1G06470	0.0344279	0.0229669	-0.00021932	0.000332544	0.00216545	-3.35488e-06	0.0334836	0.98421	0.814555	0.000341017	0.936701	0.0428149	1	0.926649	0.00705953	0.982676
A5.80	A5	1	[1971563 1971671]	[1971585 1971671]	+	AT1G06470	0.0731258	0.0808231	-0.0307077	-0.0109322	0.00648959	0.000494713	4.54449e-05	0.130984	2.64141e-05	4.90471e-09	1.74326e-10	7.18413e-05	0.339741	0.0004732	4.03893e-07	1.03933e-08
A5.910	A5	1	[1989705 1990136]	[1989526 1990136]	+	AT1G06490_and_AT1G06500	0.000236469	0.305645	-0.00224236	-0.0217375	0.000154927	0.000658513	0.000409039	0.979836	0.0554943	0.974465	0.0515347	0.000613353	1	0.205603	1	0.187954
A5.911	A5	1	[1989705 1990136]	[1989773 1990136]	+	AT1G06490_and_AT1G06500	0.000448729	0.0264533	-0.00989224	-0.000728648	0.00064631	1.73379e-05	0.00059795	0.210862	0.471315	0.134016	0.565116	0.000887561	0.463178	0.716826	0.450498	0.771518
A5.912	A5	1	[1989802 1990136]	[1989705 1990136]	+	AT1G06490_and_AT1G06500	0.00141166	0.998724	-0.00763481	-0.00140287	0.000565404	3.46766e-05	0	0.193131	0.0616231	0.0772996	0.12102	0	0.437614	0.220185	0.333467	0.328143
A5.83	A5	1	[1992545 1992706]	[1992614 1992706]	+	AT1G06510	0.00610458	0.00488109	0.000286765	-3.67299e-05	0.000363614	1.89815e-05	0.515097	0.970265	0.970232	0.386272	0.517469	0.557372	0.997788	0.996391	0.721431	0.736523
A5.1312	A5	1	[2012189 2012296]	[2012189 2012303]	-	AT1G06570	0.00675497	0.284513	-0.0100467	-0.000615433	0.00105011	1.37718e-05	1.23894e-126	0.409965	0.693212	0.11442	0.767016	4.74713e-126	0.677739	0.863403	0.413229	0.897713
A5.2228	A5	1	[2022630 2023049]	[2022630 2023037]	-	AT1G06590_and_AT1G06580	0.00527732	0.0285378	0.00392622	-0.000157304	8.44437e-05	5.53032e-05	0.143174	0.844343	0.950973	0.9383	0.46816	0.170151	0.949175	0.988114	0.993244	0.699188
A5.84	A5	1	[2026755 2026842]	[2026737 2026842]	+	AT1G06620	0.00801595	0.0472366	0.00998	-0.000688451	-0.000122753	5.56426e-05	0.0338795	0.662177	0.813766	0.921531	0.522821	0.0432915	0.852642	0.926386	0.988443	0.740218
A5.915	A5	1	[2027816 2028052]	[2027805 2028052]	+	AT1G06630_and_AT1G06640_and_AT1G06645_and_AT1G06650	0.0972316	0.174499	0.030214	-0.00198617	0.0041886	-3.39852e-06	7.56508e-14	0.20693	0.516697	0.00134102	0.970295	1.57968e-13	0.45775	0.750784	0.021062	0.997603
A5.916	A5	1	[2027805 2028052]	[2027962 2028052]	+	AT1G06630_and_AT1G06640_and_AT1G06645_and_AT1G06650	0.00559281	0.280498	-0.000896701	0.00746116	0.000920274	-0.000622625	2.79691e-05	0.989642	0.396702	0.810007	0.0187925	4.47801e-05	1	0.656546	0.949918	0.0923362
A5.917	A5	1	[2027816 2028052]	[2027962 2028052]	+	AT1G06630_and_AT1G06640_and_AT1G06645_and_AT1G06650	0.0303464	0.0725912	0.0435742	0.00164909	-0.000826739	-0.000158748	0.000803698	0.0498761	0.561862	0.495232	0.0609148	0.00118196	0.173267	0.78088	0.796526	0.210463
A5.914	A5	1	[2028976 2029049]	[2028970 2029049]	+	AT1G06630_and_AT1G06640_and_AT1G06645_and_AT1G06650	0.113705	9.4757e-05	0.0965282	0.000460445	0.00107352	-1.78977e-05	0.995521	2.4911e-08	0.835376	0.255839	0.786311	1	4.5194e-07	0.937243	0.604204	0.908595
A5.919	A5	1	[2034752 2034823]	[2034756 2034823]	+	AT1G06630_and_AT1G06640_and_AT1G06645_and_AT1G06650	0.00519867	0.489384	-0.00231457	0.0165562	0.000469577	-0.000151784	1.5483e-32	0.956332	0.00220295	0.83864	0.34621	4.13611e-32	0.992351	0.0190679	0.958728	0.598917
A5.920	A5	1	[2048186 2048296]	[2048190 2048296]	+	AT1G06670_and_AT1G06680	6.86638e-05	0.00108087	-0.00081228	1.60196e-05	5.5059e-05	-1.49218e-06	0.00699622	0.0481924	0.760714	0.0140985	0.341067	0.00955283	0.168902	0.900914	0.117363	0.593982
A5.1315	A5	1	[2054596 2054870]	[2054596 2055125]	-	AT1G06700	0.0113649	0.898799	0.0302404	0.00460427	-0.00117971	-5.27888e-05	0	5.41287e-05	1.55335e-06	0.00389131	0.0645096	0	0.000549958	4.15294e-05	0.0472954	0.218302
A5.1317	A5	1	[2054596 2054870]	[2054596 2055138]	-	AT1G06700	0.129629	0.560851	0.251523	0.0177001	-0.00761841	-0.000174854	3.88922e-88	3.31319e-18	1.70671e-06	1.36245e-06	0.112609	1.36205e-87	1.59816e-16	4.48652e-05	6.17242e-05	0.313639
A5.1316	A5	1	[2054596 2055142]	[2054596 2054870]	-	AT1G06700	0.00108326	0.0369919	-0.00214562	-0.00140191	0.000201805	6.72016e-06	6.06608e-24	0.568328	0.00357333	0.325315	0.639257	1.4877e-23	0.792824	0.0277399	0.673213	0.822116
A5.1314	A5	1	[2054596 2055125]	[2054596 2055138]	-	AT1G06700	0.134408	0.153945	0.116716	-0.00244844	0.00110572	8.48474e-05	5.49938e-15	7.67453e-09	0.343659	0.315898	0.270742	1.17771e-14	1.49626e-07	0.61099	0.665888	0.529337
A5.1313	A5	1	[2054596 2055142]	[2054596 2055125]	-	AT1G06700	0.0798175	0.2343	0.0820591	0.00694354	-0.000140102	-0.000275598	6.13467e-111	2.16582e-14	4.34708e-07	0.811018	1.68167e-11	2.27202e-110	7.91758e-13	1.35625e-05	0.950183	1.20217e-09
A5.1318	A5	1	[2054596 2055142]	[2054596 2055138]	-	AT1G06700	0.106686	0.0483982	0.106188	0.00175706	3.10977e-05	-6.76527e-05	3.63227e-06	3.9603e-23	0.200189	0.957596	0.0978474	6.0575e-06	2.72648e-21	0.453813	0.999179	0.286666
A5.922	A5	1	[2083800 2083990]	[2083839 2083990]	+	AT1G06780_and_AT1G06790_and_AT1G04513	0.00262128	0.00435402	0.0107152	1.87589e-06	-0.000505869	4.67457e-06	0.403977	0.0452907	0.997814	0.0831938	0.818789	0.447828	0.161845	1	0.347681	0.924786
A5.1323	A5	1	[2094574 2094680]	[2094574 2094670]	-	AT1G06820	0.0366012	0.0123459	0.00485813	-0.00173893	0.00198394	5.87227e-05	0.0778494	0.49882	0.0584619	4.12961e-07	0.031987	0.0956709	0.744347	0.213076	2.15971e-05	0.135176
A5.1322	A5	1	[2094833 2094910]	[2094833 2094915]	-	AT1G06820	0.0656581	0.0521007	0.0439833	0.00173905	0.00135467	-4.72796e-05	0.0040921	0.0181527	0.46533	0.182274	0.505297	0.00570879	0.0805018	0.712611	0.51367	0.728281
A5.85	A5	1	[2109986 2110169]	[2110057 2110169]	+	AT1G06870	0.0636656	0.111447	0.140518	-0.0109343	-0.00480326	0.000272055	4.96947e-12	2.09887e-17	2.43646e-07	1.04624e-07	1.62535e-05	9.97039e-12	9.55225e-16	8.07009e-06	6.21282e-06	0.000298532
A5.1325	A5	1	[2118718 2118845]	[2118718 2118831]	-	AT1G06900	0.00807326	0.00275527	-0.00137863	0.000100571	0.000590743	3.52789e-06	0.480345	0.730685	0.844402	0.00685834	0.817266	0.524663	0.891517	0.940996	0.0709886	0.92433
A5.1324	A5	1	[2118965 2119054]	[2118965 2119065]	-	AT1G06900	0.0966728	0.0268926	0.163258	-0.0045741	-0.00416156	0.000174732	0.287735	3.15641e-10	0.168317	0.00328805	0.0773583	0.327556	7.37403e-09	0.410265	0.0417804	0.245953
A5.87	A5	1	[2136587 2136870]	[2136773 2136870]	+	AT1G06960	0.0043267	0.00474001	-0.000598731	8.18853e-05	0.00030784	1.90949e-05	0.323854	0.903317	0.896686	0.252283	0.309516	0.365575	0.972365	0.965082	0.600926	0.565118
A5.86	A5	1	[2137146 2137263]	[2137143 2137263]	+	AT1G06960	0.114632	0.146472	0.068066	-0.0104463	0.00302021	0.000289112	8.64269e-09	0.00912701	0.00186359	0.0368311	0.00389269	1.5885e-08	0.0464706	0.0168007	0.215323	0.0281039
A5.923	A5	1	[2170589 2170701]	[2170586 2170701]	+	AT1G07070_and_AT1G07080	0.039409	0.00790225	0.0247921	-0.0012555	0.000913555	3.96616e-05	0.000354638	8.96137e-28	1.53615e-05	1.60919e-13	4.56545e-06	0.000533819	7.85701e-26	0.00029697	2.74114e-11	9.86919e-05
A5.1327	A5	1	[2192613 2193029]	[2192613 2193025]	-	AT1G07140	0.162251	0.0144959	0.081488	-0.00144736	0.00504772	5.52265e-05	0.131624	1.43631e-16	0.251408	6.54749e-21	0.141892	0.157188	6.17843e-15	0.517883	3.00278e-18	0.35989
A5.88	A5	1	[2200539 2200637]	[2200219 2200637]	+	AT1G07170	0.00230511	0.985154	0.00575389	8.68258e-05	-0.000215549	3.79085e-06	0	0.206838	0.881647	0.386052	0.827304	0	0.45761	0.958249	0.721382	0.929832
A5.89	A5	1	[2238307 2238389]	[2238176 2238389]	+	AT1G07280	0.0022273	0.987356	0.00765541	2.52234e-05	-0.000339257	-2.35748e-06	0	0.0902956	0.965206	0.168837	0.891164	0	0.263506	0.993977	0.499234	0.96026
A5.2229	A5	1	[2246293 2246815]	[2246293 2246375]	-	AT1G07300_and_MSTRG.732_and_AT1G07310	0.00242458	0.125273	-0.0160183	-0.00624108	0.00115268	8.85319e-05	1.1132e-07	0.508301	0.0439639	0.382917	0.337535	1.97304e-07	0.750381	0.17563	0.718858	0.590661
A5.1328	A5	1	[2258602 2258746]	[2258602 2258749]	-	AT1G07350	0.0539388	0.905095	0.0667845	0.00351484	-0.00080286	-0.000105277	0	1.28342e-05	0.0727	0.336344	0.0712099	0	0.000147717	0.244769	0.681947	0.232403
A5.90	A5	1	[2292791 2292895]	[2292717 2292895]	+	AT1G07470	0.00155853	0.987734	0.00015258	0.000358697	8.78716e-05	-1.17777e-05	0	0.960288	0.360232	0.59914	0.313338	0	0.993863	0.624156	0.855868	0.568716
A5.1330	A5	1	[2297673 2297825]	[2297673 2297754]	-	AT1G07480	0.0208605	0.0905478	0.000607075	-0.00313464	0.00126584	4.02682e-05	4.75891e-08	0.971535	0.149837	0.172616	0.534672	8.54031e-08	0.998332	0.383305	0.500651	0.749283
A5.1329	A5	1	[2299275 2299363]	[2299275 2299369]	-	AT1G07480	0.0194606	0.533519	0.0454853	-0.000688271	-0.00162654	-7.1411e-05	1.81516e-89	0.0955831	0.843737	0.274626	0.492463	6.37938e-89	0.273475	0.940852	0.625935	0.717514
A5.1335	A5	1	[2332930 2333073]	[2332930 2333167]	-	AT1G07570	0.00402039	0.986878	0.011649	-0.00114848	-0.000476787	5.09532e-05	0	0.0248695	0.0838506	0.0923502	0.0100494	0	0.103067	0.267549	0.369178	0.0583781
A5.1334	A5	1	[2332930 2333167]	[2332930 2333504]	-	AT1G07570	0.0819438	0.672939	-0.0565489	-0.0114857	0.00865579	-0.000306373	8.40387e-24	0.409981	0.190869	0.0207913	0.241606	2.05765e-23	0.677739	0.441617	0.151092	0.494736
A5.2231	A5	1	[2346389 2346629]	[2346389 2346730]	-	AT1G07620_and_AT1G07615	0.0993794	0.316266	0.149207	-0.0182572	-0.00322686	0.000695125	2.57624e-05	0.0517542	0.0654967	0.441613	0.0187107	4.1338e-05	0.177782	0.228625	0.760664	0.092071
A5.1336	A5	1	[2355699 2355985]	[2355699 2356316]	-	AT1G07640	0.00211225	0.964928	0.00694477	0.00157968	-0.000302033	-3.62879e-05	0	0.0880296	0.00242271	0.173854	0.0193751	0	0.258946	0.0205057	0.502236	0.0943341
A5.93	A5	1	[2379798 2380103]	[2379729 2380103]	+	AT1G07700	0.187503	0.423275	0.15324	0.0168259	0.00214141	-0.000739759	1.46389e-73	1.52842e-10	3.91395e-08	0.101003	5.15508e-16	4.88783e-73	3.66255e-09	1.56191e-06	0.386886	6.71061e-14
A5.1338	A5	1	[2401258 2401343]	[2401258 2401355]	-	AT1G07745	0.00211721	0.450775	-0.0145735	-0.000420974	0.00104317	-0.000153381	9.04608e-21	0.76834	0.946978	0.699149	0.416103	2.13156e-20	0.910975	0.986265	0.902512	0.659509
A5.1339	A5	1	[2402458 2402619]	[2402458 2402754]	-	AT1G07745	0.219989	0.733378	0.113263	-0.00127518	0.00667036	-0.00011254	1.05513e-96	0.0016812	0.78221	0.000695759	0.412897	3.77773e-96	0.0112774	0.911773	0.0125472	0.656772
A5.1340	A5	1	[2412219 2412547]	[2412219 2412609]	-	AT1G07780	0.000689116	0.997223	0.00199542	0.000229795	-9.25872e-05	-4.21104e-06	0	0.136842	0.163821	0.249671	0.427088	0	0.350334	0.403628	0.598001	0.668846
A5.94	A5	1	[2422432 2422507]	[2422351 2422507]	+	AT1G07830	0.0170369	0.974874	0.0132038	-0.0012738	0.000239568	3.58874e-05	0	0.0932469	0.205635	0.576677	0.231404	0	0.268595	0.460645	0.84351	0.482715
A5.924	A5	1	[2424274 2424570]	[2424153 2424570]	+	AT1G07840_and_AT1G07850	0.0211868	0.3577	0.0736279	0.00966514	-0.00327757	-0.000233466	2.60595e-23	0.045964	0.040595	0.103426	0.0969089	6.33943e-23	0.163273	0.165954	0.39157	0.284719
A5.1089	A5	1	[19966710 19966804]	[19966719 19966804]	+	AT1G07887_and_AT1G53490	0.250967	0.145699	0.216739	0.0111374	0.0022894	-0.000316371	0.0252286	0.00111246	0.196644	0.535451	0.219226	0.0326658	0.00791656	0.449398	0.821741	0.468014
A5.98	A5	1	[2437741 2437992]	[2437751 2437992]	+	AT1G07890	0.00598999	0.994609	0.00355892	0.000124931	0.000151942	-9.88316e-06	0	0.0150282	0.504649	0.0570409	0.0764906	0	0.0692198	0.742423	0.281289	0.244157
A5.97	A5	1	[2437833 2437992]	[2437555 2437992]	+	AT1G07890	0.000141877	0.995173	-2.38744e-05	-0.000653401	1.03595e-05	1.68613e-05	0	0.991278	0.0193641	0.930712	0.042839	0	1	0.0988601	0.991008	0.165098
A5.95	A5	1	[2437741 2437992]	[2437833 2437992]	+	AT1G07890	0.106731	0.865849	0.0910508	0.0054465	0.00098004	-0.000213624	2.51673e-297	0.000158309	0.0773586	0.456068	0.0200714	1.1935e-296	0.00144406	0.253748	0.769949	0.0968171
A5.96	A5	1	[2437751 2437992]	[2437833 2437992]	+	AT1G07890	0.0122131	0.0249515	0.01898	0.00250979	-0.000422929	-5.63925e-05	2.77019e-05	0.00188402	0.00131724	0.204283	0.0154217	4.43689e-05	0.0124309	0.0127407	0.542748	0.0799791
A5.925	A5	1	[2444010 2444642]	[2444103 2444642]	+	AT1G07900_and_AT1G07910_and_AT1G07902_and_AT1G07920	0						1	1	1	1	1	1	1	1	1	1
A5.926	A5	1	[2447427 2447843]	[2447420 2447843]	+	AT1G07900_and_AT1G07910_and_AT1G07902_and_AT1G07920	0.340932	0.179621	0.376609	0.00115542	-0.00222981	0.000112126	6.83967e-06	3.78097e-20	0.825506	0.318363	0.47272	1.12665e-05	2.15097e-18	0.932205	0.667907	0.702797
A5.1343	A5	1	[2464814 2465409]	[2464814 2464912]	-	AT1G07940	0.000178057	0.00229319	7.46459e-05	-9.70118e-05	6.4632e-06	2.28486e-06	2.85648e-09	0.850515	0.0555716	0.764855	0.130217	5.32497e-09	0.951766	0.205788	0.932426	0.342595
A5.99	A5	1	[2479239 2479399]	[2479306 2479399]	+	AT1G07990	0.063884	0.0294953	0.0588552	-0.00308534	0.000314304	0.000111469	0.124936	0.00284112	0.221393	0.770177	0.138144	0.149644	0.017564	0.481662	0.934276	0.354426
A5.1344	A5	1	[2490289 2490356]	[2490289 2490376]	-	AT1G08030	0.000847055	0.993145	0.00398708	-0.00569822	-0.000196251	0.00015549	0	0.802748	0.00526591	0.821687	0.0106064	0	0.928668	0.0373158	0.953662	0.0607447
A5.1348	A5	1	[2496296 2496398]	[2496296 2496388]	-	AT1G08040	0.0105647	0.0257759	0.00370564	-0.0016758	0.000428693	5.91061e-05	0.00996128	0.717987	0.201763	0.443769	0.130765	0.013417	0.885398	0.455579	0.76159	0.343301
A5.1345	A5	1	[2496825 2496929]	[2496825 2496909]	-	AT1G08040	0.0137014	0.035768	0.0297676	0.000473338	-0.00100414	-4.87717e-05	0.00988695	0.0363689	0.794787	0.195657	0.368407	0.0133229	0.137636	0.917607	0.53173	0.619624
A5.1346	A5	1	[2497998 2498483]	[2497998 2498479]	-	AT1G08040	0.460202	0.240556	0.473673	-0.000679926	-0.000841925	0.000279164	4.96637e-08	1.24575e-25	0.906531	0.733124	0.105669	8.9078e-08	9.85035e-24	0.968804	0.917868	0.301354
A5.100	A5	1	[2535585 2535674]	[2535385 2535674]	+	AT1G08110	0.079945	0.588322	0.092054	0.00124616	-0.000756808	-3.90264e-05	2.80385e-218	1.51076e-06	0.61081	0.468552	0.592715	1.23097e-217	2.07729e-05	0.814317	0.777615	0.789386
A5.1349	A5	1	[2540484 2540587]	[2540484 2540598]	-	AT1G08125	0.0298492	0.00460885	0.0140272	-0.000879766	0.000988879	2.93666e-05	0.507506	0.049286	0.335139	0.0110635	0.28025	0.549716	0.171749	0.602381	0.0988916	0.539193
A5.1350	A5	1	[2540997 2541115]	[2540997 2541102]	-	AT1G08125	0.0844761	0.128287	0.0463951	0.00231698	0.00238007	-8.13606e-05	2.03854e-08	0.04802	0.440251	0.062993	0.363061	3.70723e-08	0.168568	0.694108	0.298114	0.614585
A5.1351	A5	1	[2541862 2542012]	[2541862 2542216]	-	AT1G08125	0.00573006	0.982731	0.0137218	-0.000422293	-0.000499485	3.19399e-05	0	0.0117008	0.544238	0.092543	0.12372	0	0.0566971	0.768825	0.369502	0.332679
A5.1353	A5	1	[2581691 2581787]	[2581691 2581855]	-	AT1G08220	0.0199276	0.0256553	0.0373111	-0.00239827	-0.00108647	0.000118874	0.24377	0.0984552	0.406449	0.377784	0.167277	0.280603	0.279705	0.665312	0.715258	0.397238
A5.1354	A5	1	[2585084 2586097]	[2585084 2586288]	-	AT1G08230	0.0538436	0.972994	-0.0720193	-0.0145441	0.00786643	-0.000279729	3.21781e-228	0.0199639	0.000239665	3.17635e-06	0.017742	1.42573e-227	0.0867226	0.00311843	0.000130603	0.08847
A5.1356	A5	1	[2634151 2634287]	[2634151 2634306]	-	AT1G08350	0.167775	0.0466171	0.0428833	-0.00681239	0.00780573	0.000248212	0.0737821	0.108883	0.0465183	8.83232e-08	0.0149225	0.0908861	0.299179	0.182294	5.35145e-06	0.078138
A5.929	A5	1	[2636053 2636196]	[2636109 2636196]	+	AT1G08360_and_AT1G08370	0.00289148	0.0237838	0.000650889	-0.00082045	0.000140037	2.30488e-05	0.000360287	0.924181	0.348437	0.707424	0.376675	0.000542076	0.979166	0.614605	0.906044	0.626845
A5.101	A5	1	[2642541 2642989]	[2642599 2642989]	+	AT1G08390	0.0743554	0.848357	0.0519712	0.00639899	0.00139902	-0.000232864	1.33136e-118	0.166782	0.183329	0.495092	0.104144	5.00415e-118	0.39918	0.432178	0.796461	0.298254
A5.1358	A5	1	[2645288 2645377]	[2645288 2645355]	-	AT1G08400	0.0146729	0.0389228	-0.0346184	-0.00420751	0.00309192	0.000134199	0.259624	0.325913	0.35551	0.108518	0.323117	0.297554	0.599277	0.62066	0.401257	0.578784
A5.1357	A5	1	[2645288 2645388]	[2645288 2645377]	-	AT1G08400	0.175188	0.693381	0.252982	-0.0166595	-0.00486213	0.00046135	7.34924e-24	0.000340941	0.0652282	0.206975	0.0866065	1.80076e-23	0.00282632	0.227981	0.546204	0.26493
A5.102	A5	1	[2659010 2659132]	[2659006 2659132]	+	AT1G08430	0.000368559	0.00475553	0.000929741	0.00100304	-3.50739e-05	-3.79089e-05	0.434875	0.881701	0.209541	0.918039	0.111457	0.479531	0.964709	0.465782	0.987399	0.311687
A5.1360	A5	1	[2692469 2692696]	[2692469 2692634]	-	AT1G08510	0.0528172	0.0485219	-0.018523	-0.00808108	0.00445876	0.000338419	1.89473e-06	0.0762531	1.49121e-09	5.1788e-15	1.95063e-17	3.20355e-06	0.234995	8.08234e-08	1.08718e-12	3.10953e-15
A5.930	A5	1	[2707301 2707423]	[2707128 2707423]	+	AT1G08540_and_AT1G08550	0.003908	0.914142	0.0179561	0.00604983	-0.000878006	-0.000116167	0	0.138498	9.57305e-05	0.184247	0.011934	0	0.353447	0.00144419	0.516785	0.0663592
A5.104	A5	1	[2712985 2713095]	[2713010 2713095]	+	AT1G08570	0.264398	-0.0138604	0.198718	0.00447478	0.004105	0.000203871	0.860423	0.0139973	0.665377	0.352119	0.508401	0.883116	0.0654317	0.847547	0.695327	0.730629
A5.105	A5	1	[2723957 2724074]	[2723938 2724074]	+	AT1G08600	0.166567	0.795383	0.155782	-0.00808668	0.000674084	0.000162371	8.33481e-23	0.0605537	0.446384	0.881666	0.607859	2.01411e-22	0.199239	0.699138	0.973848	0.800259
A5.106	A5	1	[2737048 2737267]	[2736846 2737267]	+	AT1G08620	0.00216329	0.995309	-0.000331071	-6.93045e-06	0.000155898	-2.34e-06	0	0.931637	0.988801	0.459019	0.873626	0	0.982109	1	0.772179	0.952623
A5.1362	A5	1	[2749801 2750018]	[2749801 2749993]	-	AT1G08640	0.0706353	0.002709	0.0869223	0.000462219	-0.00101794	-1.83086e-05	0.674517	2.08131e-39	0.585123	0.00480881	0.467999	0.711136	2.94046e-37	0.797117	0.0551137	0.699091
A5.1365	A5	1	[2757514 2757588]	[2757514 2757601]	-	AT1G08660	0.0168553	0.974794	0.00891959	-0.00266793	0.000495979	7.95786e-05	0	0.423053	0.0610764	0.414173	0.0607982	0	0.68931	0.21899	0.740954	0.21023
A5.1364	A5	1	[2757683 2757804]	[2757683 2757800]	-	AT1G08660	0.180471	0.0294683	0.0312749	-0.00489393	0.00932478	0.000162186	0.0433971	0.0366552	0.0105974	3.31595e-30	0.00447494	0.0548443	0.138456	0.063207	4.85485e-27	0.0314543
A5.1363	A5	1	[2759245 2759412]	[2759245 2759405]	-	AT1G08660	0.183151	0.642238	0.357839	0.00884907	-0.010918	7.78329e-05	0	1.71248e-115	1.00905e-05	2.24565e-37	0.192451	0	1.50144e-112	0.000207591	9.56328e-34	0.432489
A5.107	A5	1	[2772212 2772443]	[2772217 2772443]	+	AT1G08710	0.0343596	0.938696	0.0613764	0.00121296	-0.00168855	1.70407e-05	0	3.14633e-16	0.207088	3.80763e-05	0.551939	0	1.32662e-14	0.462765	0.00111171	0.761656
A5.108	A5	1	[2772606 2772696]	[2772616 2772696]	+	AT1G08710	0.0263748	0.0104658	0.0205718	0.000529463	0.000362687	-3.05357e-05	0.284658	0.0403679	0.68006	0.50766	0.424749	0.324189	0.148289	0.855998	0.803899	0.666584
A5.109	A5	1	[2801138 2801267]	[2801160 2801267]	+	AT1G08750	0.000125636	0.997274	0.000257637	0.000105168	-8.25004e-06	-4.36122e-08	0	0.84304	0.527551	0.907475	0.992985	0	0.948655	0.757565	0.982559	1
A5.110	A5	1	[2802613 2802823]	[2802617 2802823]	+	AT1G08750	0.031418	0.971712	0.0219742	-0.000382582	0.000590238	-2.14339e-06	0	0.00971395	0.724923	0.202957	0.947247	0	0.0488978	0.879811	0.541278	0.987407
A5.1366	A5	1	[2819858 2819969]	[2819858 2819976]	-	AT1G08810	0.0506187	0.129138	0.100977	0.000497743	-0.00314742	-0.000116583	1.02249e-10	8.37186e-07	0.849462	0.00488171	0.135686	1.98583e-10	1.21502e-05	0.943828	0.0557563	0.350872
A5.1373	A5	1	[2822641 2822832]	[2822641 2822823]	-	AT1G08820	0.0245132	0.0333389	-0.00707219	-0.00511229	0.00197409	0.000160382	1.52432e-05	0.371144	4.34947e-07	4.74072e-06	1.03606e-07	2.47266e-05	0.643672	1.35625e-05	0.000184252	3.44315e-06
A5.1369	A5	1	[2824476 2824791]	[2824476 2824573]	-	AT1G08820	0.0293727	0.0329731	0.0554342	-0.00408836	-0.00166778	0.000181293	0.328156	0.113941	0.359352	0.387788	0.17884	0.369982	0.308677	0.623636	0.722452	0.413566
A5.1371	A5	1	[2824476 2825161]	[2824476 2824573]	-	AT1G08820	0.00615755	0.0190905	-0.0021148	-0.0022987	0.000517022	7.74497e-05	0.0104476	0.782163	0.0188193	0.215308	0.0078995	0.0140492	0.918397	0.0968413	0.557243	0.0487848
A5.1370	A5	1	[2824476 2825166]	[2824476 2824573]	-	AT1G08820	0.0031553	0.00526637	0.000994472	-0.000628189	0.000135051	2.21271e-05	0.0439155	0.710729	0.067083	0.355891	0.0304112	0.0554665	0.880949	0.232555	0.69815	0.130409
A5.1368	A5	1	[2824476 2824791]	[2824476 2825161]	-	AT1G08820	0.00922712	0.97761	0.012067	0.00192392	-0.000177493	-6.42562e-05	0	0.303637	0.199883	0.781513	0.150749	0	0.576449	0.453361	0.938665	0.373427
A5.1367	A5	1	[2824476 2824791]	[2824476 2825166]	-	AT1G08820	0.00213006	0.996483	0.00160171	0.000256558	3.30215e-05	-1.1935e-05	0	0.530365	0.432139	0.812567	0.220027	0	0.766405	0.687249	0.95042	0.468936
A5.1372	A5	1	[2824476 2825166]	[2824476 2825161]	-	AT1G08820	0.0466926	0.196757	0.0515739	0.00561481	-0.000305085	-0.000121224	1.11808e-05	0.261684	0.339528	0.903131	0.488896	1.8231e-05	0.530559	0.606739	0.981206	0.714695
A5.1374	A5	1	[2837598 2837736]	[2837598 2837697]	-	AT1G08840	0.0129214	0.866036	0.0177598	-0.0121778	-0.0014202	0.000568848	7.96254e-24	0.855467	0.345364	0.840549	0.249038	1.95024e-23	0.95297	0.612451	0.959245	0.503651
A5.111	A5	1	[2850044 2850136]	[2850052 2850136]	+	AT1G08890	0.0192783	0.0371059	0.0293986	-0.00391908	-0.000632517	0.00028369	0.0278555	0.0894127	0.0767683	0.502949	1.71175e-05	0.0358909	0.261569	0.252618	0.801632	0.000311332
A5.112	A5	1	[2859057 2859192]	[2859110 2859192]	+	AT1G08910	0						1	1	1	1	1	1	1	1	1	1
A5.113	A5	1	[2881022 2881112]	[2880573 2881112]	+	AT1G08960	0.00188048	0.975034	0.00608253	0.00184216	-0.000262628	-0.000198557	0	0.638569	0.266194	0.710081	5.76733e-05	0	0.838564	0.533427	0.907485	0.000895904
A5.931	A5	1	[2883916 2884030]	[2883848 2884030]	+	AT1G08970_and_AT1G08980	0.0142769	0.914014	1.38745e-06	-0.00367905	0.000892221	2.60318e-05	0	0.999901	0.0103787	0.144933	0.542768	0	1	0.0622765	0.466218	0.754978
A5.932	A5	1	[2885058 2885149]	[2885083 2885149]	+	AT1G08970_and_AT1G08980	0.00989281	-0.00200292	0.00933536	0.000497415	3.48407e-05	-1.64164e-05	0.345501	1.82034e-05	0.0742774	0.76937	0.0480344	0.387866	0.000203913	0.247767	0.933996	0.178773
A5.1375	A5	1	[2897726 2897839]	[2897726 2897832]	-	AT1G09010	0.231007	0.0718125	0.00682792	-0.0118124	0.0140112	0.000378407	0.000318382	0.738656	6.44131e-06	4.00081e-36	1.23222e-06	0.000480483	0.895005	0.000142762	1.32516e-32	3.14491e-05
A5.1376	A5	1	[2898229 2898304]	[2898229 2898329]	-	AT1G09010	0.0465049	0.0263481	-0.00786301	-0.0035745	0.00339799	0.000119052	0.00178553	0.363517	0.00124354	6.10682e-13	0.000307305	0.00256242	0.636725	0.012166	9.58129e-11	0.00367754
A5.1377	A5	1	[2898900 2899138]	[2898900 2899083]	-	AT1G09010	0.000937797	0.00522625	0.00303383	-0.000161525	-0.000131002	1.63316e-06	0.0263276	0.208777	0.600935	0.319797	0.85912	0.0339987	0.460057	0.807622	0.669077	0.945703
A5.114	A5	1	[2911436 2912344]	[2911463 2912344]	+	AT1G09040	0.0110196	0.90072	0.129794	0.00508481	-0.0074234	-7.08198e-05	2.07221e-39	0.0650392	0.572114	0.053083	0.791721	5.8375e-39	0.209636	0.788002	0.269162	0.91149
A5.115	A5	1	[2911463 2912344]	[2911800 2912344]	+	AT1G09040	0.00120207	0.00723472	-0.00833942	0.000376254	0.000599933	-2.31986e-05	0.292396	0.236765	0.678122	0.12457	0.390947	0.332478	0.499113	0.855306	0.433306	0.639424
A5.1378	A5	1	[2925248 2925687]	[2925248 2925711]	-	AT1G09060	0.177024	0.128962	0.139808	0.0113112	0.002326	-0.00041913	1.40357e-05	4.43862e-06	0.00370357	0.161604	0.000306879	2.28026e-05	5.60183e-05	0.0285604	0.491723	0.0036754
A5.117	A5	1	[2933606 2933695]	[2933611 2933695]	+	AT1G09090	0.101568	0.143511	0.0973829	-0.00124495	0.000261569	6.51641e-07	0.00198448	0.0408016	0.838047	0.919779	0.997135	0.00283797	0.149606	0.938371	0.987941	1
A5.2232	A5	1	[2939859 2940027]	[2939859 2940071]	-	AT1G09100_and_AT1G09130	0.000720019	0.00111479	-0.000683313	-2.58665e-05	8.77083e-05	1.09948e-06	0.302118	0.537538	0.855255	0.146887	0.794684	0.342543	0.771126	0.946915	0.469485	0.913208
A5.1379	A5	1	[2960178 2960309]	[2960178 2960289]	-	AT1G09170	0.049473	0.0204758	0.0717476	0.00370925	-0.00152182	-0.000165097	0.618854	0.0892626	0.494573	0.515426	0.308076	0.657755	0.261309	0.735072	0.809621	0.563876
A5.1380	A5	1	[2968403 2968479]	[2968403 2968474]	-	AT1G09195	0.0433929	0.92857	0.0176921	-0.00910077	0.00138321	0.00029918	7.34599e-83	0.757078	0.142358	0.622355	0.0980162	2.52402e-82	0.904271	0.372423	0.868476	0.287048
A5.1383	A5	1	[2980778 2980850]	[2980778 2980854]	-	AT1G09230	0.00718045	0.0908617	-0.00272508	-0.00263108	0.000619095	0.000102643	1.40481e-12	0.835944	0.118111	0.388483	0.0407452	2.85073e-12	0.945415	0.331867	0.722663	0.159461
A5.1384	A5	1	[2998915 2999027]	[2998915 2999022]	-	AT1G09280	0.0138378	0.0553153	0.0276927	0.000383703	-0.000865929	3.55908e-05	2.29452e-06	0.0211072	0.802788	0.186242	0.436887	3.86351e-06	0.0906636	0.921171	0.519548	0.677178
A5.1386	A5	1	[3011494 3011618]	[3011494 3011622]	-	AT1G09320	0.0258786	0.894267	0.0864948	0.00503404	-0.00378851	-6.23442e-05	0	4.54799e-10	0.00457079	5.58359e-07	0.238516	0	1.04369e-08	0.0333882	2.83506e-05	0.49083
A5.1387	A5	1	[3013372 3014043]	[3013372 3013469]	-	AT1G09330	0.00425085	0.00470826	0.00137154	-4.12448e-05	0.000179957	2.5783e-06	0.00311265	0.401207	0.843583	0.0434878	0.678898	0.00438259	0.669839	0.940799	0.239593	0.848068
A5.118	A5	1	[3015574 3016034]	[3015910 3016034]	+	AT1G09340	0.000491282	0.00201013	-0.000702234	-0.0001292	7.45948e-05	3.60558e-06	1.97226e-07	0.0764925	0.0108543	0.000562301	0.0170386	3.46596e-07	0.235441	0.064344	0.0105481	0.0858556
A5.2233	A5	1	[3039449 3039549]	[3039449 3039513]	-	AT1G09420_and_AT1G09415	0.0382985	0.305557	-0.0261524	-0.00445802	0.00402819	-0.000129335	9.767e-44	0.247243	0.123165	0.00108756	0.133339	2.83693e-43	0.512438	0.340045	0.0178624	0.347268
A5.119	A5	1	[3044018 3044217]	[3044043 3044217]	+	AT1G09430	0.0289869	0.00787352	0.0269416	-0.000313221	0.000127827	5.87036e-06	0.000161212	2.55377e-36	0.252797	0.27373	0.471937	0.00024736	3.29558e-34	0.519097	0.624991	0.702334
A5.120	A5	1	[3076808 3077172]	[3076748 3077172]	+	AT1G09530	0.0372464	0.713603	0.00295927	-0.02031	0.00214295	0.00034287	9.81802e-122	0.92444	3.62612e-07	0.20806	0.00394441	3.7151e-121	0.979267	1.14994e-05	0.54729	0.0283667
A5.1391	A5	1	[3099223 3099422]	[3099223 3099660]	-	AT1G09570	0.00250986	0.966869	0.0100201	-0.000201494	-0.000469391	1.62423e-05	0	0.236048	0.852259	0.308929	0.614369	0	0.498148	0.945311	0.660251	0.804948
A5.1393	A5	1	[3099223 3099766]	[3099223 3099660]	-	AT1G09570	0.00226925	0.992985	0.00435609	2.50364e-06	-0.000130427	3.54248e-06	0	0.0267253	0.992059	0.224005	0.63648	0	0.108702	1	0.567244	0.820403
A5.1394	A5	1	[3099223 3099766]	[3099223 3100146]	-	AT1G09570	0.000352084	0.99678	0.0021488	9.75442e-05	-0.000112295	-4.36487e-06	0	0.104998	0.565172	0.12045	0.387693	0	0.291815	0.783326	0.424172	0.636827
A5.1396	A5	1	[3099223 3100146]	[3099223 3099936]	-	AT1G09570	1.71425e-05	0.0104978	-0.00145885	0.000246107	9.22494e-05	-4.22039e-06	0.000237794	0.618612	0.511562	0.563923	0.705588	0.000361371	0.825462	0.747093	0.837162	0.86288
A5.121	A5	1	[3141013 3141093]	[3141009 3141093]	+	AT1G09710	0.0311392	0.0565641	-0.00372195	0.0010661	0.00217882	-7.12303e-05	0.01509	0.876134	0.727115	0.0944081	0.433906	0.0199669	0.962664	0.881109	0.373222	0.675091
A5.122	A5	1	[3143074 3143270]	[3143194 3143270]	+	AT1G09710	0.000454158	-0.00243014	0.00066519	0.00051731	-1.31895e-05	-1.34935e-05	0.486177	0.852593	0.258711	0.946157	0.322787	0.529577	0.952205	0.525833	0.995444	0.57838
A5.2234	A5	1	[3178688 3178829]	[3178688 3178825]	-	AT1G09800_and_AT1G04733	0.167058	0.159265	0.160442	-0.00839372	0.000413492	0.000335505	0.0049667	0.00580651	0.25933	0.896317	0.130234	0.00686754	0.0320185	0.526471	0.979099	0.342595
A5.2495	A5	1	[29913736 29914286]	[29913736 29914322]	-	AT1G09867_and_MSTRG.8121_and_AT1G79520_and_AT1G09873_and_AT1G09877_and_AT1G09883	0.0922144	0.85956	0.0717595	-0.00359748	0.00222849	-0.000177204	1.91074e-11	0.580034	0.830332	0.766264	0.728237	3.78189e-11	0.800538	0.934503	0.933026	0.875635
A5.2236	A5	1	[3223831 3224378]	[3223831 3224274]	-	AT1G09910_and_AT1G09920	0.101866	0.12603	0.140824	-0.0115013	-0.00254588	0.000285064	1.38091e-11	1.79398e-13	2.92879e-06	0.0162997	0.0001022	2.74269e-11	5.91577e-12	7.13878e-05	0.128264	0.00145769
A5.2235	A5	1	[3223831 3224378]	[3223831 3224347]	-	AT1G09910_and_AT1G09920	0.186662	0.0292881	0.0822224	-0.0046676	0.00652746	0.000146671	0.450149	0.0387806	0.359187	0.00263676	0.333545	0.494744	0.144144	0.623612	0.0353743	0.586157
A5.2238	A5	1	[3232777 3232964]	[3232777 3232882]	-	AT1G09932_and_AT1G09930	0.0400456	0.0251333	-0.0262937	0.00328831	0.0041866	-0.000121258	0.400557	0.393966	0.40289	0.014314	0.305486	0.444334	0.662985	0.662155	0.118462	0.563876
A5.1398	A5	1	[3258770 3258887]	[3258770 3258864]	-	AT1G09980	0.124063	0.913006	0.0546742	-0.00183646	0.00433678	-7.55799e-05	0	0.00447531	0.455503	3.58081e-05	0.302642	0	0.0258194	0.7045	0.00105687	0.562559
A5.1399	A5	1	[3276179 3276261]	[3276179 3276257]	-	AT1G10040	0						1	1	1	1	1	1	1	1	1	1
A5.123	A5	1	[3286399 3286533]	[3286358 3286533]	+	AT1G10060	0.0240295	0.0900392	0.0307013	-0.00194913	-0.000416986	-2.13297e-05	9.5104e-25	0.000640628	0.0902678	0.395375	0.533838	2.35371e-24	0.0049156	0.280885	0.727266	0.748739
A5.1400	A5	1	[3292897 3293298]	[3292897 3293269]	-	AT1G10090	0.00454843	0.973183	0.0025343	0.00248526	0.000125883	-0.000187478	0	0.843399	0.129984	0.857258	0.000126323	0	0.948779	0.351299	0.964225	0.001745
A5.2240	A5	1	[3297992 3298112]	[3297992 3298339]	-	AT1G10095_and_AT1G10100	0.0137244	0.902271	0.034127	0.00709706	-0.00127516	-0.000153438	0	0.00162839	3.03317e-07	0.0309273	0.000202332	0	0.0109749	9.81996e-06	0.193726	0.00260203
A5.124	A5	1	[3318263 3318367]	[3318259 3318367]	+	AT1G10130	0.584358	0.0982663	0.586685	0.00911041	-0.00014543	-0.000221856	0.000126366	3.00599e-110	0.00677445	0.919258	0.0268962	0.000195038	2.24022e-107	0.0452421	0.987714	0.119104
A5.125	A5	1	[3320868 3320984]	[3320873 3320984]	+	AT1G10130	0.249552	0.0221778	0.250163	-0.00125101	-3.81919e-05	4.3548e-05	0.189675	3.84085e-47	0.572993	0.96781	0.51021	0.221733	7.15598e-45	0.78852	1	0.731744
A5.1401	A5	1	[3359301 3359771]	[3359301 3359773]	-	AT1G10240	0.0461513	0.137561	0.114517	-0.0109608	-0.00427285	0.000375219	0.111885	0.197034	0.334501	0.377606	0.267514	0.134775	0.443389	0.601742	0.715179	0.525118
A5.127	A5	1	[3375835 3376174]	[3375827 3376174]	+	AT1G10290	0.088906	0.00742171	0.0566292	-0.000977277	0.0020173	4.15333e-05	0.38448	9.91372e-11	0.382949	2.4039e-05	0.213334	0.427758	2.45048e-09	0.645234	0.000747239	0.46024
A5.2242	A5	1	[3386466 3386596]	[3386466 3386576]	-	AT1G10310_and_AT1G10320	0.348609	0.20199	0.326852	-0.0173689	0.00175742	0.000761188	0.00433569	6.15833e-06	0.0641056	0.661824	0.0065694	0.00603168	7.56718e-05	0.225441	0.884077	0.0424434
A5.1402	A5	1	[3391956 3392057]	[3391956 3392045]	-	AT1G10340	0.000643182	1.00076	0.000128636	-0.000192955	3.21591e-05	5.02486e-06	0	0.923661	0.261249	0.660576	0.32615	0	0.978957	0.52806	0.88342	0.578859
A5.1403	A5	1	[3410652 3410767]	[3410652 3410761]	-	AT1G10390	0.1364	0.221177	0.167438	-0.00292333	-0.00193986	0.000195066	1.27479e-33	4.77256e-19	0.223646	0.0582566	0.00642597	3.43656e-33	2.49159e-17	0.484688	0.285009	0.0417043
A5.1407	A5	1	[3429828 3430188]	[3429828 3430184]	-	AT1G10430	0.0252351	0.941392	0.0135003	-0.000306882	0.000733421	-3.75866e-05	0	0.245824	0.836638	0.247806	0.396665	0	0.510948	0.937856	0.595734	0.644677
A5.130	A5	1	[3453337 3453559]	[3453264 3453559]	+	AT1G10490	0.00411739	0.827967	0.0481037	0.00156878	-0.00284181	8.35073e-05	1.08117e-62	0.34645	0.810693	0.322394	0.672228	3.46744e-62	0.620319	0.924469	0.670879	0.844293
A5.129	A5	1	[3453337 3453564]	[3453264 3453564]	+	AT1G10490	0.127284	0.758513	0.156074	0.00250238	-0.00189812	2.30283e-05	1.60746e-23	0.059812	0.810446	0.675077	0.942259	3.92099e-23	0.197562	0.924428	0.890326	0.985002
A5.1408	A5	1	[3503004 3503369]	[3503004 3503373]	-	AT1G10590	0.0624404	0.897156	0.0951533	0.0018111	-0.00204456	1.51903e-05	0	1.26954e-80	0.00467118	6.91359e-14	0.425849	0	5.48477e-78	0.0339961	1.2341e-11	0.667677
A5.937	A5	1	[3504488 3504568]	[3504392 3504568]	+	AT1G10600_and_AT1G10610	0.113183	0.880552	0.146299	-0.0120559	-0.00211566	0.000436014	4.13168e-101	0.00011551	0.0114752	0.287071	0.00112099	1.4969e-100	0.00109175	0.0671001	0.638029	0.0105247
A5.934	A5	1	[3505344 3506112]	[3505191 3506112]	+	AT1G10600_and_AT1G10610	0.0255119	0.359938	-0.00499206	-0.0158269	0.0019065	0.000443218	1.21486e-09	0.934509	0.0417244	0.565124	0.0556432	2.29049e-09	0.983213	0.168995	0.837781	0.197796
A5.933	A5	1	[3506556 3507031]	[3506572 3507031]	+	AT1G10600_and_AT1G10610	0.0905474	0.897194	0.0761569	-0.00542621	0.000899407	0.000125444	1.79118e-222	0.00842637	0.142337	0.568466	0.254979	7.89983e-222	0.0433909	0.372423	0.839782	0.510574
A5.1409	A5	1	[3514250 3514468]	[3514250 3514646]	-	AT1G10630	0.000126139	0.998853	-0.000955105	-0.000171513	6.75778e-05	5.44997e-06	0	0.49196	0.334781	0.372792	0.303655	0	0.740187	0.601955	0.711774	0.563633
A5.132	A5	1	[3533933 3534080]	[3533916 3534080]	+	AT1G10660	0.154312	0.00203152	0.179149	0.00200114	-0.0015523	-7.46318e-05	0.871382	4.99908e-44	0.224345	0.0270762	0.128296	0.893196	8.37205e-42	0.48539	0.178092	0.339675
A5.135	A5	1	[3535578 3535773]	[3535641 3535773]	+	AT1G10670	0.0147495	0.480918	0.0128518	-0.00467443	0.000118605	0.000215641	1.89766e-67	0.651264	0.198799	0.93905	0.0466452	6.19123e-67	0.846487	0.452146	0.993357	0.175518
A5.133	A5	1	[3535645 3535773]	[3535578 3535773]	+	AT1G10670	0.012693	0.979883	0.0136233	0.000839251	-5.81473e-05	-2.70523e-05	0	6.66976e-06	0.0301084	0.724554	0.01897	0	8.13858e-05	0.13424	0.91419	0.0929262
A5.134	A5	1	[3535645 3535773]	[3535641 3535773]	+	AT1G10670	0.0145273	0.977217	0.0168493	0.000765015	-0.000145123	-2.06273e-05	0	1.28891e-06	0.0857746	0.444649	0.119995	0	1.79628e-05	0.271729	0.762144	0.326462
A5.136	A5	1	[3566914 3567027]	[3566933 3567027]	+	AT1G10730	0.00173146	0.949266	0.0196353	-0.00212987	-0.00111899	8.60031e-05	0	0.28811	0.367792	0.267139	0.222265	0	0.560319	0.63116	0.617717	0.471888
A5.1411	A5	1	[3587584 3587701]	[3587584 3587705]	-	AT1G10760	0.100229	0.0559395	0.0766793	-0.00703384	0.00147185	0.000202299	2.14527e-07	4.21857e-12	6.75167e-07	0.0147611	1.6202e-06	3.764e-07	1.19996e-10	2.01066e-05	0.120391	3.9982e-05
A5.1412	A5	1	[3589074 3589192]	[3589074 3589142]	-	AT1G10760	0.0504452	0.0447785	0.0899264	-0.00504118	-0.00246758	0.000137936	9.69087e-09	2.95026e-29	8.65719e-07	1.62504e-08	6.24062e-06	1.77863e-08	2.87409e-27	2.48384e-05	1.19611e-06	0.00012921
A5.1414	A5	1	[3602459 3602605]	[3602459 3602998]	-	AT1G10820	0.0068888	0.868058	0.0211001	0.0061825	-0.000888204	-0.000135599	0	0.0578393	1.39741e-05	0.143281	0.00138473	0	0.192796	0.000275508	0.463894	0.0123812
A5.1413	A5	1	[3604021 3604435]	[3604021 3604431]	-	AT1G10820	0.0688808	0.0553276	0.00425212	-0.00505535	0.00403929	0.000220829	0.00184993	0.815583	0.0302123	4.88228e-05	0.00148615	0.00265203	0.935457	0.134563	0.00136147	0.01308
A5.2243	A5	1	[3610173 3610289]	[3610173 3610285]	-	AT1G10830_and_AT1G10840	0.0725292	0.015557	0.07128	-0.000840875	7.80746e-05	1.69787e-05	0.000403109	3.03458e-56	0.145123	0.751048	0.323472	0.000604643	8.07686e-54	0.376259	0.92615	0.578859
A5.1415	A5	1	[3615313 3616080]	[3615313 3616088]	-	AT1G10865	0.00916645	0.956071	0.020051	0.000859495	-0.000680283	1.39762e-06	0	0.000186314	0.210568	0.0201262	0.945525	0	0.00165791	0.467047	0.147701	0.986804
A5.1417	A5	1	[3619404 3619818]	[3619404 3619910]	-	AT1G10870	0.0012914	0.977009	-0.00409897	0.0011601	0.000336898	-3.35483e-05	0	0.50556	0.140816	0.315844	0.152891	0	0.748336	0.369882	0.665888	0.376233
A5.1416	A5	1	[3619404 3619924]	[3619404 3619910]	-	AT1G10870	0.00668489	0.976976	0.0080454	-0.00180612	-8.50319e-05	2.99e-05	0	0.545922	0.28933	0.906866	0.556048	0	0.777541	0.55966	0.982313	0.764707
A5.137	A5	1	[3628972 3629097]	[3628229 3629097]	+	AT1G10890	0.0956953	0.835654	0.0926677	-0.0100816	0.00018923	0.000374577	0	2.36622e-09	3.83752e-07	0.823163	2.44017e-10	0	4.9465e-08	1.20926e-05	0.954205	1.39619e-08
A5.138	A5	1	[3629780 3629844]	[3629304 3629844]	+	AT1G10890	0.036439	0.951904	0.0577369	-0.00570575	-0.00133112	0.000241184	0	1.19785e-07	4.3324e-05	0.0252739	6.59438e-09	0	1.97938e-06	0.000729242	0.171358	2.84484e-07
A5.1419	A5	1	[3636514 3637022]	[3636514 3636997]	-	AT1G10900	0.0607113	0.0558991	0.0416197	0.00314914	0.00119323	-9.11432e-05	0.00518805	0.042502	0.230257	0.286394	0.243885	0.00716066	0.154285	0.492711	0.637406	0.497197
A5.139	A5	1	[3643517 3643731]	[3643582 3643731]	+	AT1G10910	0.00466383	0.9916	-0.00392183	-0.000497954	0.000536604	8.3675e-06	0	0.598974	0.601752	0.187196	0.76851	0	0.812415	0.808211	0.52094	0.898576
A5.1420	A5	1	[3647386 3647654]	[3647386 3647481]	-	AT1G10920	0						1	1	1	1	1	1	1	1	1	1
A5.2244	A5	1	[3657184 3657278]	[3657184 3657273]	-	AT1G10930_and_AT1G10940	0.00606713	0.00592165	0.00318559	-0.000495359	0.000180096	3.17235e-05	0.00932222	0.172762	0.0975091	0.157695	0.000368626	0.0125864	0.409058	0.295011	0.486226	0.00426582
A5.938	A5	1	[3677429 3677732]	[3677584 3677732]	+	AT1G11010_and_AT1G11020	0.00811422	-0.00223682	0.0160042	0.00121618	-0.000493124	-4.33358e-05	0.710016	0.00950669	0.123492	0.143011	0.0654713	0.744402	0.0480656	0.340545	0.463393	0.220481
A5.142	A5	1	[3686579 3687024]	[3686569 3687024]	+	AT1G11060	0.00996076	0.889226	0.00606016	0.00425965	0.000243788	-0.000201716	8.51794e-143	0.865784	0.353119	0.900815	0.140003	3.36987e-142	0.957611	0.618457	0.980631	0.357068
A5.140	A5	1	[3686569 3687024]	[3686626 3687024]	+	AT1G11060	0.00130968	0.000994602	0.0056946	0.000755938	-0.000274058	-6.56392e-06	0.914767	0.550295	0.535422	0.598241	0.856674	0.933014	0.780741	0.763769	0.855163	0.944572
A5.143	A5	1	[3715543 3717149]	[3715547 3717149]	+	AT1G11120	0.00135074	0.00427344	-0.00618645	-0.000404801	0.000471074	1.05526e-05	0.295048	0.139518	0.449837	0.0391705	0.508508	0.335215	0.355189	0.701419	0.223938	0.730639
A5.145	A5	1	[3741273 3741524]	[3740869 3741524]	+	AT1G11170	0.0109497	0.993031	0.00259718	-0.00170096	0.000527767	3.91227e-05	0	0.85965	0.377161	0.511891	0.494385	0	0.954847	0.640089	0.806909	0.719207
A5.147	A5	1	[3743667 3743793]	[3743633 3743793]	+	AT1G11170	0.00759868	0.962716	0.0208482	-0.00118223	-0.000828097	7.22114e-05	0	0.252323	0.611897	0.404587	0.298296	0	0.519314	0.814938	0.732951	0.55831
A5.939	A5	1	[3745888 3746343]	[3745970 3746343]	+	AT1G11180_and_AT1G11175	0.0169688	0.0496413	0.0122789	-0.00116055	0.000293115	-6.76873e-06	2.97804e-15	0.0570678	0.159823	0.405069	0.7832	6.40561e-15	0.190781	0.398321	0.733291	0.907109
A5.940	A5	1	[3748118 3748220]	[3748139 3748220]	+	AT1G11180_and_AT1G11175	0.0316355	0.947984	0.0271578	0.00209092	0.00027986	-7.09407e-05	0	0.00158475	0.0573264	0.550736	0.0304311	0	0.0107196	0.210456	0.830633	0.130435
A5.2247	A5	1	[3787985 3788069]	[3787985 3788083]	-	AT1G11270_and_AT1G11280_and_MSTRG.1201	0.0229285	0.00642574	0.0161269	-0.000896759	0.000425098	3.67396e-05	0.299379	0.0111242	0.26985	0.219944	0.129218	0.339774	0.0545234	0.537968	0.562665	0.340895
A5.2248	A5	1	[3789226 3790596]	[3789226 3789339]	-	AT1G11270_and_AT1G11280_and_MSTRG.1201	0.0147198	0.839274	0.0704104	0.0137256	-0.00348067	-0.000366107	2.22282e-48	0.231993	0.0685891	0.278784	0.103043	6.6269e-48	0.492899	0.235802	0.630399	0.296183
A5.149	A5	1	[3799056 3799146]	[3799061 3799146]	+	AT1G11303	0.0702133	0.0391384	0.0894091	-0.00249486	-0.00119974	5.01169e-05	0.210933	0.0053413	0.543483	0.493228	0.682092	0.245143	0.0298564	0.768691	0.795064	0.850064
A5.1421	A5	1	[3814658 3814736]	[3814658 3814755]	-	AT1G11340	0.0403105	0.0817095	-0.045314	-0.00619136	0.00535153	0.000275296	0.113552	0.392318	0.360965	0.0640539	0.172798	0.136728	0.66136	0.624767	0.30127	0.404902
A5.2252	A5	1	[3821780 3822146]	[3821780 3822163]	-	AT1G11350_and_AT1G11360	0.185864	0.84845	0.190295	-0.0110813	-0.000276963	0.000336654	1.45352e-179	4.1908e-10	0.00446657	0.867642	0.00374387	6.08133e-179	9.65439e-09	0.0328437	0.968227	0.0272672
A5.2251	A5	1	[3821795 3822146]	[3821795 3822017]	-	AT1G11350_and_AT1G11360	0.250351	0.816003	0.120958	-0.010878	0.00808709	-0.000216334	2.7703e-149	0.000169943	0.00821926	4.06577e-06	0.0777248	1.10804e-148	0.00153283	0.05212	0.000161386	0.246644
A5.2250	A5	1	[3821795 3822017]	[3821795 3822163]	-	AT1G11350_and_AT1G11360	0.0410055	0.643465	0.0729747	0.00991324	-0.00199807	-2.86398e-06	4.47086e-262	0.000131802	4.92345e-05	0.0550149	0.968604	2.05769e-261	0.00122323	0.000810425	0.274531	0.996844
A5.2249	A5	1	[3821795 3822146]	[3821795 3822163]	-	AT1G11350_and_AT1G11360	0.109176	0.882804	0.0961249	-0.00205599	0.000815699	3.08654e-05	0	9.83299e-31	0.0540095	0.0730143	0.331653	0	1.01426e-28	0.202018	0.323459	0.584175
A5.941	A5	1	[3837987 3838707]	[3838162 3838707]	+	AT1G11400_and_AT1G11410	0.00252205	0.0371358	0.00541101	-0.000880274	-0.00018056	-6.58588e-06	3.46511e-21	0.179642	0.0879682	0.411779	0.668341	8.20192e-21	0.41882	0.276122	0.739053	0.841566
A5.942	A5	1	[3838083 3838707]	[3838162 3838707]	+	AT1G11400_and_AT1G11410	0.0744883	0.287979	0.0402918	-0.00709603	0.00227364	0.000103135	0.000691886	0.648275	0.541867	0.668788	0.778027	0.00102206	0.844658	0.76752	0.886769	0.903928
A5.150	A5	1	[3853519 3853757]	[3853458 3853757]	+	AT1G11450	0.00199416	0.0665582	-0.0175144	0.00194577	0.00121929	-0.000130421	0.00368363	0.456335	0.517754	0.341833	0.145653	0.00515729	0.715551	0.75135	0.686014	0.365696
A5.1422	A5	1	[3866435 3866658]	[3866435 3866654]	-	AT1G11480	0.000389886	0.00128221	-0.00153261	-4.00798e-06	0.000120156	-1.418e-06	0.399584	0.32637	0.983995	0.158412	0.811724	0.443337	0.599599	1	0.487485	0.921633
A5.153	A5	1	[3951713 3952344]	[3951657 3952344]	+	AT1G11720	0.0123351	0.0223951	-0.00740028	-0.00338499	0.00123346	0.000133958	0.144793	0.638586	0.0931178	0.151292	0.0257309	0.171963	0.838564	0.286849	0.476898	0.115309
A5.152	A5	1	[3951713 3952344]	[3951683 3952344]	+	AT1G11720	0.0457316	0.0382274	0.0429048	-0.00148846	0.000176672	4.07122e-05	0.0504424	0.0323449	0.561709	0.871671	0.594234	0.0633105	0.125965	0.780815	0.970042	0.790416
A5.154	A5	1	[3954798 3954885]	[3954773 3954885]	+	AT1G11720	0.140799	0.0723999	-0.00760209	-0.011599	0.00927506	0.000387656	0.00389496	0.767658	0.000426249	3.91437e-11	7.74997e-05	0.00544166	0.910757	0.00500058	4.8418e-09	0.00115571
A5.156	A5	1	[3981740 3983203]	[3981728 3983203]	+	AT1G11790	0.248075	0.0639914	0.302786	-0.00311233	-0.00341946	3.76221e-05	0.0353866	2.90801e-22	0.435624	0.0445626	0.751786	0.0451283	1.86425e-20	0.690092	0.24322	0.890145
A5.1423	A5	1	[3991415 3991721]	[3991415 3991987]	-	AT1G11820	0.000307738	-0.000377714	0.000295493	7.24951e-05	7.65346e-07	-2.19636e-06	0.305902	0.434942	0.13435	0.970431	0.127924	0.346622	0.698292	0.358838	1	0.339212
A5.157	A5	1	[3995470 3996040]	[3995472 3996040]	+	AT1G11840	0.0664421	0.13563	0.0437692	0.00242897	0.00141706	-5.20391e-05	0.0156711	0.44717	0.741617	0.651909	0.812597	0.0207072	0.708674	0.890072	0.882797	0.922092
A5.943	A5	1	[4001452 4001797]	[4001526 4001797]	+	AT1G11860_and_AT1G11870	0.000120457	0.000245138	-0.000102193	-3.1402e-05	1.39156e-05	1.89173e-06	0.32761	0.690778	0.339374	0.32075	0.0533985	0.369423	0.869581	0.606654	0.669811	0.19269
A5.159	A5	1	[4029208 4029323]	[4029232 4029323]	+	AT1G11930	0.0184558	0.0230565	0.0158895	0.00108879	0.000160397	-2.35583e-05	0.000159002	0.0111828	0.174233	0.638767	0.323798	0.000244045	0.0547709	0.419167	0.876379	0.578859
A5.1424	A5	1	[4035045 4035154]	[4035045 4035125]	-	AT1G11950	0.00707123	0.889842	0.0387013	0.00447059	-0.00197688	-0.000102871	7.25461e-272	0.135305	0.177515	0.161994	0.297703	3.36591e-271	0.347764	0.423823	0.492256	0.55769
A5.947	A5	1	[4159750 4160063]	[4159883 4160063]	+	AT1G12240_and_AT1G12244_and_AT1G12250	0.0202029	0.427741	0.0329464	0.0286752	-0.000589558	-0.000565614	1.42215e-11	0.610161	0.000594938	0.867466	0.0231473	2.82365e-11	0.819873	0.00657586	0.968194	0.106649
A5.164	A5	1	[4198561 4198862]	[4198485 4198862]	+	AT1G12350	0.0234035	0.134598	0.0692355	0.00411208	-0.0028645	-0.000268609	0.00407982	0.149871	0.503836	0.274805	0.142785	0.00569246	0.371895	0.741785	0.626103	0.361358
A5.165	A5	1	[4202195 4202287]	[4202206 4202287]	+	AT1G12360	0.0905328	0.0164641	0.0601577	-0.00266286	0.00189845	9.16121e-05	0.339037	0.000661238	0.238755	0.048865	0.173735	0.381313	0.00505553	0.503273	0.256772	0.40637
A5.948	A5	1	[4221934 4222286]	[4222010 4222286]	+	AT1G12390_and_AT1G12400	0.0228413	0.944108	0.0285164	0.00192564	-0.000354693	-1.62608e-05	0	0.0684625	0.336239	0.677851	0.785212	0	0.217669	0.603481	0.892003	0.908029
A5.167	A5	1	[4251852 4251946]	[4251864 4251946]	+	AT1G12470	0.00468939	0.00380463	-0.00484909	-0.00029991	0.000596155	8.80677e-06	0.254106	0.156538	0.493403	0.00140866	0.499675	0.291713	0.382365	0.734172	0.021861	0.723805
A5.166	A5	1	[4253966 4254113]	[4253978 4254113]	+	AT1G12470	0.0732032	0.00208855	0.103897	0.000944518	-0.00191839	-3.81544e-05	0.84029	1.48607e-22	0.487468	0.000941795	0.346523	0.865102	9.77921e-21	0.729159	0.0158705	0.599264
A5.2257	A5	1	[4268277 4268528]	[4268277 4268374]	-	AT1G12530_and_AT1G12510_and_AT1G12520	0.0250141	0.819725	0.0724901	0.0097306	-0.00296725	-0.00011439	0	0.000439095	0.000225775	0.00834793	0.145618	0	0.0035291	0.00296492	0.0816711	0.365668
A5.168	A5	1	[4306028 4306168]	[4306065 4306168]	+	AT1G12650	0.002431	0.0608654	-0.0153068	-0.00198935	0.00110861	-1.14023e-05	0.000208271	0.363269	0.355727	0.227437	0.858992	0.000317932	0.636578	0.62075	0.571771	0.945703
A5.1427	A5	1	[4320919 4321288]	[4320919 4321515]	-	AT1G12680	0.0103508	0.977038	0.0100309	0.000356191	1.99935e-05	-1.83292e-05	0	0.133162	0.676825	0.956244	0.471625	0	0.343872	0.854887	0.998641	0.702044
A5.1428	A5	1	[4324036 4324164]	[4324036 4324134]	-	AT1G12700	0						1	1	1	1	1	1	1	1	1	1
A5.1429	A5	1	[4327859 4327991]	[4327859 4327944]	-	AT1G12710	0.0185634	0.0606224	0.0010684	-0.00649106	0.00109344	0.00018402	4.36352e-13	0.900967	3.43684e-09	0.0195702	1.88225e-08	8.94797e-13	0.971704	1.72479e-07	0.14469	7.47988e-07
A5.1431	A5	1	[4345972 4346048]	[4345972 4346452]	-	AT1G12750	0.000904176	0.995851	-0.00471462	-0.000246645	0.000351175	-5.54072e-06	0	0.23087	0.624199	0.101868	0.711856	0	0.491265	0.823313	0.388274	0.866216
A5.1430	A5	1	[4347537 4348240]	[4347537 4347629]	-	AT1G12750	0.0208184	-0.0010951	0.00953962	0.00209024	0.000704925	-7.11504e-05	0.966187	0.71888	0.537593	0.625859	0.481273	0.979994	0.885589	0.76462	0.869952	0.709358
A5.949	A5	1	[4351269 4351822]	[4351582 4351822]	+	AT1G12760_and_AT1G12770	0.00226791	0.00813109	0.00374483	-0.000106743	-9.23073e-05	-2.17737e-06	0.00763522	0.231053	0.789605	0.588416	0.855058	0.0103901	0.491556	0.915223	0.849984	0.943573
A5.1432	A5	1	[4393468 4393545]	[4393468 4393541]	-	AT1G12900	1.50242e-05	5.90863e-05	-3.97356e-07	-1.24391e-06	9.63848e-07	4.20155e-08	0.323433	0.994835	0.874159	0.773499	0.857515	0.365126	1	0.955441	0.934885	0.94494
A5.1434	A5	1	[4399735 4399913]	[4399735 4399893]	-	AT1G12930	0.0042503	0.0770902	-0.010706	-0.00371748	0.000934772	4.73372e-05	1.47725e-10	0.385713	0.0185644	0.165054	0.314372	2.85674e-10	0.657109	0.0959273	0.496454	0.569831
A5.1435	A5	1	[4401687 4401774]	[4401687 4401778]	-	AT1G12930	0.278444	0.79914	0.161822	-0.000344295	0.00542574	-0.000243624	4.02612e-15	0.0622464	0.972843	0.198678	0.350591	8.64065e-15	0.203171	0.997934	0.535467	0.603135
A5.1433	A5	1	[4401695 4401774]	[4401695 4401778]	-	AT1G12930	0.0677735	0.941019	0.00660673	-0.00713537	0.00382293	0.000138715	0	0.736194	0.00445631	0.000352424	0.0635188	0	0.893819	0.0327883	0.00726417	0.216128
A5.170	A5	1	[4424907 4424995]	[4424911 4424995]	+	AT1G12970	0.00821136	0.974783	0.0252726	-0.000444538	-0.00106632	2.49004e-05	0	0.0290355	0.764081	0.0913425	0.572606	0	0.115932	0.902312	0.366674	0.776064
A5.1437	A5	1	[4438764 4439137]	[4438764 4439111]	-	AT1G13000	0.000259496	0.0614756	-0.014203	-0.00498383	0.000903907	0.000118664	0.000270549	0.424477	0.0272454	0.351482	0.0787963	0.000410018	0.690111	0.125395	0.694668	0.248852
A5.1438	A5	1	[4438764 4439111]	[4438764 4439375]	-	AT1G13000	0.000487648	0.994274	0.00132479	0.000443478	-5.23216e-05	-1.11125e-05	0	0.442338	0.0444219	0.578096	0.0909422	0	0.704649	0.176695	0.844426	0.273605
A5.1436	A5	1	[4438764 4439137]	[4438764 4439375]	-	AT1G13000	0.0395483	0.929489	0.030378	-0.00270458	0.000573139	2.8169e-05	0	0.0121771	0.0810672	0.385942	0.541987	0	0.0584729	0.261368	0.721382	0.754348
A5.1439	A5	1	[4490151 4490329]	[4490151 4490266]	-	AT1G13170	0.00112265	0.00245188	0.000481968	-0.000196907	4.00424e-05	3.95937e-06	0.12231	0.767181	0.344451	0.652079	0.523465	0.146622	0.910648	0.611633	0.882797	0.740849
A5.171	A5	1	[4495440 4495534]	[4495456 4495534]	+	AT1G13180	0.0119408	0.021823	0.0191316	-0.00022215	-0.000449427	-5.02022e-06	0.0172903	0.0419295	0.853527	0.381063	0.888641	0.02275	0.152802	0.945895	0.71779	0.958859
A5.172	A5	1	[4517382 4517572]	[4517393 4517572]	+	AT1G13220	0.0320273	0.0424105	-0.00502077	-0.00227102	0.0023155	9.97722e-05	0.12149	0.858175	0.527539	0.130878	0.351585	0.145733	0.954311	0.757565	0.444338	0.604064
A5.1440	A5	1	[4567376 4567466]	[4567376 4567688]	-	AT1G13320	0.00134901	0.994434	0.00177368	7.00966e-05	-2.65417e-05	1.65668e-06	0	0.364899	0.779569	0.803722	0.824311	0	0.637953	0.910744	0.947915	0.928297
A5.1444	A5	1	[4574044 4574241]	[4574044 4574379]	-	AT1G13350	0.00454122	0.916585	0.032098	0.00465841	-0.0017223	-6.97259e-05	0	1.42124e-08	1.25348e-10	2.43898e-08	0.00123166	0	2.67131e-07	8.57027e-09	1.72289e-06	0.0113636
A5.1443	A5	1	[4575835 4575961]	[4575835 4575914]	-	AT1G13350	0.413019	0.250822	0.380455	-0.0126104	0.00203524	0.000767199	1.42035e-12	1.17232e-25	0.00667309	0.304527	3.04183e-08	2.88169e-12	9.31918e-24	0.0447324	0.655543	1.14927e-06
A5.1442	A5	1	[4575835 4575914]	[4575835 4576238]	-	AT1G13350	0.0295005	0.965443	-0.0311307	0.00703874	0.00378945	-0.00128217	8.51685e-115	0.47413	0.205892	0.110243	1.04754e-14	3.18035e-114	0.730447	0.460923	0.40512	1.18735e-12
A5.1441	A5	1	[4575835 4575961]	[4575835 4576238]	-	AT1G13350	0.390745	0.782822	0.1492	-0.0107955	0.0150966	-0.000371481	4.77571e-56	0.00338611	0.0974783	5.48163e-08	0.0556338	1.48574e-55	0.0204373	0.294997	3.55233e-06	0.197796
A5.1445	A5	1	[4613516 4613754]	[4613516 4613612]	-	AT1G13450	0.029299	-0.00544259	0.0333045	0.00515079	-0.000250342	-8.50676e-05	0.615107	0.0027081	0.000288619	0.679442	0.0444874	0.654052	0.0168853	0.00362647	0.892726	0.169659
A5.177	A5	1	[4615978 4616427]	[4616022 4616427]	+	AT1G13460	0.00623151	0.00692506	0.0110335	-0.000933548	-0.000300125	2.75855e-05	0.121535	0.0161862	0.111775	0.23053	0.114771	0.145777	0.0735088	0.321064	0.575794	0.31717
A5.178	A5	1	[4616049 4616427]	[4615978 4616427]	+	AT1G13460	0.0242241	0.927233	0.0541046	0.00160404	-0.00186753	3.13723e-05	0	1.31286e-06	0.262277	0.00220666	0.461817	0	1.82709e-05	0.52924	0.0308973	0.69487
A5.174	A5	1	[4616059 4616427]	[4615978 4616427]	+	AT1G13460	0.191241	0.554458	0.244835	0.0103372	-0.00334961	-4.87604e-05	3.53231e-131	9.63721e-26	0.000536925	0.00852396	0.583684	1.36804e-130	7.70202e-24	0.00604446	0.0829777	0.783709
A5.175	A5	1	[4616059 4616427]	[4616022 4616427]	+	AT1G13460	0.0588122	0.000511009	0.0781595	0.000337197	-0.00215981	-9.98831e-06	0.990042	0.0900458	0.955426	0.606363	0.95661	1	0.262931	0.990032	0.85938	0.991538
A5.176	A5	1	[4616059 4616427]	[4616049 4616427]	+	AT1G13460	0.0306533	0.082409	-0.0205192	0.00344681	0.00307266	-0.00020849	0.0464416	0.646064	0.570573	0.409392	0.2593	0.0585132	0.84311	0.787043	0.736733	0.515832
A5.2259	A5	1	[4641428 4641554]	[4641428 4641545]	-	AT1G13560_and_AT1G13570	0.0325711	0.0185992	-0.0132858	-0.00329061	0.00286605	0.000110078	0.000276892	0.0113508	9.53067e-07	1.36237e-23	3.74346e-08	0.000419311	0.0553792	2.70323e-05	9.02493e-21	1.38281e-06
A5.1453	A5	1	[4695638 4695724]	[4695638 4695953]	-	AT1G13700	0.000909655	0.937163	0.00495723	0.00277133	-0.000252973	-0.000147393	0	0.736664	0.141732	0.753098	0.00872092	0	0.893991	0.371365	0.927021	0.0524875
A5.1455	A5	1	[4695638 4696206]	[4695638 4695953]	-	AT1G13700	0.0630452	0.469242	0.158432	0.0229281	-0.00596171	-0.000262673	2.5534e-40	1.21565e-05	7.48166e-07	0.0025485	0.0570857	7.24785e-40	0.000140677	2.19085e-05	0.0345322	0.201507
A5.1454	A5	1	[4695638 4696307]	[4695638 4695953]	-	AT1G13700	0.0513065	0.133738	0.0303758	0.00416923	0.00130816	-0.000144153	2.19258e-17	0.0603637	0.0439211	0.138176	0.0193846	4.90182e-17	0.198811	0.175555	0.456915	0.0943435
A5.1452	A5	1	[4695638 4696206]	[4695638 4696307]	-	AT1G13700	0.0054222	0.857337	0.0326973	0.00612459	-0.0017047	-5.45481e-05	0	0.00475238	3.57273e-05	0.00697213	0.216618	0	0.027098	0.000617768	0.0716686	0.464359
A5.181	A5	1	[4723320 4723395]	[4723315 4723395]	+	AT1G13770	0.029591	0.10754	0.0378968	-0.0058972	-0.000519112	0.000125876	6.35656e-06	0.120993	0.0592981	0.697022	0.176672	1.04806e-05	0.321205	0.214994	0.901716	0.410587
A5.182	A5	1	[4723749 4723820]	[4723715 4723820]	+	AT1G13770	0.139651	0.0630046	0.0749451	-0.00669783	0.00404411	0.000208439	0.00632938	0.00154736	0.027017	0.00174084	0.0209111	0.0086745	0.010512	0.124652	0.0256536	0.0996899
A5.2261	A5	1	[4745125 4745225]	[4745125 4745236]	-	AT1G13860_and_AT1G13870	0.00887644	0.961868	-0.00279255	0.00252331	0.000729312	-0.000149071	0	0.889456	0.326282	0.505805	0.0516147	0	0.967728	0.596021	0.803091	0.188049
A5.2260	A5	1	[4745711 4745872]	[4745711 4745792]	-	AT1G13860_and_AT1G13870	0.000456282	1.00054	9.12564e-05	-0.000136885	2.28141e-05	3.5647e-06	0	0.923661	0.261249	0.660576	0.32615	0	0.978957	0.52806	0.88342	0.578859
A5.2262	A5	1	[4746540 4746625]	[4746540 4746678]	-	AT1G13860_and_AT1G13870	0.0227709	0.868787	-0.0333994	-0.00577185	0.00351064	0.000183927	4.01417e-85	0.46377	0.322366	0.158063	0.289885	1.39078e-84	0.72178	0.592644	0.48679	0.549536
A5.183	A5	1	[4749046 4749591]	[4749201 4749591]	+	AT1G13880	0.000480784	0.000612234	-0.000124868	-8.15596e-05	3.78533e-05	2.38106e-06	0.333745	0.847613	0.326572	0.285603	0.336435	0.375758	0.950901	0.596131	0.636594	0.589478
A5.1456	A5	1	[4765925 4766395]	[4765925 4766593]	-	AT1G13940	0.0548355	0.0903649	0.0826665	-0.000713348	-0.00173944	3.54456e-05	0.15566	0.205487	0.931949	0.62532	0.88676	0.184106	0.455601	0.979557	0.869933	0.95816
A5.184	A5	1	[4777068 4777742]	[4777393 4777742]	+	AT1G13960	0.00741822	0.0355554	-0.0185738	-0.00381912	0.0016245	0.000142343	0.186943	0.501594	0.280158	0.281334	0.176722	0.218746	0.745725	0.549298	0.632418	0.410607
A5.185	A5	1	[4788654 4789460]	[4788658 4789460]	+	AT1G13980	0.0179533	0.0213148	-0.010638	-0.00215067	0.00178696	5.51647e-05	0.03584	0.307248	0.106664	0.00166766	0.164866	0.0456812	0.580313	0.312711	0.0248638	0.393569
A5.186	A5	1	[4788654 4789491]	[4788658 4789491]	+	AT1G13980	0.0422308	0.0338389	0.00339223	-0.00548073	0.00242741	0.000261955	0.646105	0.964212	0.570975	0.556171	0.363394	0.684328	0.995246	0.787365	0.833838	0.615005
A5.1457	A5	1	[4806404 4806519]	[4806404 4806492]	-	AT1G14030	0.0664995	0.0121717	0.0561487	-0.00198171	0.000646924	6.20212e-05	0.604975	0.0200237	0.521118	0.623272	0.500344	0.644496	0.0869113	0.753408	0.869023	0.724074
A5.188	A5	1	[4847319 4847658]	[4847389 4847658]	+	AT1G14180	0.00647359	0.00346776	0.000836752	-0.000630501	0.000352709	1.97032e-05	0.609375	0.903846	0.481176	0.351632	0.46048	0.648465	0.972519	0.724694	0.694781	0.693709
A5.950	A5	1	[4855681 4855776]	[4855688 4855776]	+	AT1G14190_and_AT1G14205	0.243744	0.459596	0.0923555	-0.0134304	0.0094618	0.00046191	1.25348e-07	0.300525	0.239295	0.0518659	0.174365	2.21811e-07	0.573101	0.503809	0.265839	0.407162
A5.191	A5	1	[4864965 4865150]	[4864902 4865150]	+	AT1G14240	0.157486	-0.0690933	0.0455876	0.0628169	0.00699363	-0.00194453	0.723188	0.819801	0.01415	0.521787	0.0108051	0.756748	0.937803	0.078491	0.813786	0.0614931
A5.190	A5	1	[4864982 4865150]	[4864965 4865150]	+	AT1G14240	0.125529	0.839233	0.158742	-0.00834791	-0.0019002	0.000347867	9.49114e-38	0.0208821	0.353971	0.619695	0.198079	2.64397e-37	0.0898909	0.619169	0.866776	0.440089
A5.194	A5	1	[4865032 4865150]	[4864965 4865150]	+	AT1G14240	0.108339	0.72021	0.126001	0.00808583	-0.00126334	-0.000341797	7.98841e-14	0.202424	0.533937	0.816415	0.381682	1.66726e-13	0.451126	0.762841	0.951746	0.631337
A5.1458	A5	1	[4880861 4880968]	[4880861 4881559]	-	AT1G14290	0.00265572	0.99311	0.00258355	-0.000360401	4.51075e-06	2.24082e-06	0	0.189677	0.152714	0.966519	0.765394	0	0.43268	0.387758	1	0.896871
A5.196	A5	1	[4885619 4885704]	[4885605 4885704]	+	AT1G14310	0.0461021	0.950953	0.0548424	-0.00496917	-0.000546266	0.000160603	0	1.32634e-05	0.00203745	0.426454	0.000819752	0	0.000152304	0.0179587	0.748902	0.00817558
A5.195	A5	1	[4886501 4886605]	[4886488 4886605]	+	AT1G14310	0.0919177	0.0149387	0.118996	-0.00083553	-0.00169237	1.36352e-05	0.429553	8.58889e-10	0.736404	0.109817	0.853725	0.474171	1.90786e-08	0.886779	0.403956	0.943006
A5.197	A5	1	[4888429 4888548]	[4888279 4888548]	+	AT1G14320	2.19851e-05	0.998955	0.000143601	1.26267e-05	-7.60101e-06	4.8902e-07	0	0.433804	0.590636	0.447606	0.484431	0	0.697239	0.80053	0.763886	0.711625
A5.1468	A5	1	[4920804 4921174]	[4920804 4921458]	-	AT1G14380	0.00476012	0.987354	0.0101125	-0.000447906	-0.000334524	2.02213e-05	0	0.18377	0.645394	0.420237	0.485648	0	0.424863	0.83547	0.744962	0.712368
A5.1469	A5	1	[4920804 4921467]	[4920804 4921174]	-	AT1G14380	0.00159297	0.00149335	-0.000348203	0.000191643	0.000121323	-7.12289e-06	0.468884	0.869243	0.478844	0.293078	0.377037	0.51331	0.959602	0.723311	0.643399	0.627203
A5.1473	A5	1	[4920804 4921294]	[4920804 4921458]	-	AT1G14380	0.0213393	0.963373	0.0272891	0.00157138	-0.000371864	-5.45963e-05	0	0.12169	0.486064	0.699056	0.416636	0	0.322537	0.728449	0.902466	0.659807
A5.1474	A5	1	[4920804 4921294]	[4920804 4921467]	-	AT1G14380	0.00184377	0.99196	0.00597209	0.000501911	-0.00025802	-1.51853e-05	0	0.0721123	0.237465	0.154376	0.230313	0	0.225972	0.501486	0.481778	0.48163
A5.1460	A5	1	[4920804 4921458]	[4920804 4921427]	-	AT1G14380	0.00370555	0.0693729	0.0856161	-0.00212577	-0.00511941	0.000163371	0.0125648	0.00267768	0.560105	0.000998593	0.132859	0.0167745	0.0167341	0.779602	0.0166024	0.346576
A5.1461	A5	1	[4920804 4921467]	[4920804 4921427]	-	AT1G14380	0.0256179	0.0153572	0.0371892	-0.000774315	-0.000723202	4.22608e-05	0.118105	0.000225234	0.548291	0.188527	0.271489	0.141867	0.00195807	0.771872	0.522307	0.530095
A5.1463	A5	1	[4920804 4921458]	[4920804 4921462]	-	AT1G14380	0.0549145	0.00721201	-0.00806157	-0.000795978	0.003936	4.71833e-05	0.665565	0.637667	0.716261	2.49834e-05	0.469627	0.702592	0.837911	0.87505	0.00077337	0.700194
A5.1464	A5	1	[4920804 4921467]	[4920804 4921458]	-	AT1G14380	0.153138	0.128725	0.11384	0.0041514	0.0024561	-0.000135865	7.21881e-06	0.000109691	0.270237	0.12608	0.225895	1.18753e-05	0.00104203	0.538379	0.436066	0.476536
A5.1462	A5	1	[4920804 4921467]	[4920804 4921462]	-	AT1G14380	0.0301652	0.00534014	-0.00796178	-0.00087478	0.00238294	3.1213e-05	0.532785	0.364668	0.436286	6.58304e-07	0.35121	0.574385	0.637731	0.690506	3.31487e-05	0.603607
A5.951	A5	1	[4956871 4957159]	[4957000 4957159]	+	AT1G14480_and_MSTRG.1598_and_AT1G14470	0						1	1	1	1	1	1	1	1	1	1
A5.2263	A5	1	[4968402 4968500]	[4968402 4968497]	-	AT1G14520_and_AT1G14530	0.016014	0.0107092	0.0101413	0.000262423	0.000367044	1.36298e-05	0.559625	0.590222	0.913269	0.720893	0.849421	0.600367	0.808014	0.971993	0.911964	0.94131
A5.2264	A5	1	[4969039 4969120]	[4969039 4969129]	-	AT1G14520_and_AT1G14530	0.00114492	0.976711	-0.00680837	0.000570852	0.000497081	-5.48605e-05	0	0.748712	0.833721	0.668135	0.498335	0	0.900313	0.936162	0.886603	0.722467
A5.198	A5	1	[4989790 4990041]	[4989618 4990041]	+	AT1G14580	0.0206256	0.730231	0.0287236	-0.00194803	-0.000506126	0.000129703	4.83662e-104	0.406253	0.659763	0.78851	0.325235	1.76604e-103	0.674487	0.844458	0.942222	0.578859
A5.199	A5	1	[4990256 4990483]	[4990260 4990483]	+	AT1G14580	0.025189	0.0143955	-0.011368	-0.00248112	0.00228481	8.00538e-05	0.0935221	0.196716	0.0276481	1.97376e-06	0.0170898	0.113792	0.443042	0.126701	8.69095e-05	0.0860409
A5.1475	A5	1	[5003056 5003228]	[5003056 5003197]	-	AT1G14600	0.142528	0.0920884	0.0911326	-0.00466711	0.00302005	7.94697e-05	0.0401617	0.0356715	0.391534	0.187778	0.613866	0.050926	0.135582	0.652265	0.521782	0.804579
A5.1476	A5	1	[5015696 5015782]	[5015696 5016045]	-	AT1G14620	0.00719399	0.980232	0.0141168	0.000187349	-0.000432674	4.95374e-06	0	1.84654e-05	0.656867	0.0161246	0.693412	0	0.000206626	0.842672	0.127645	0.856419
A5.1477	A5	1	[5034921 5034997]	[5034921 5034987]	-	AT1G14660	0.036647	0.01872	0.0135046	-0.0023968	0.0014464	9.38914e-05	0.456463	0.60052	0.467588	0.30392	0.339556	0.500963	0.813297	0.71457	0.654904	0.592428
A5.200	A5	1	[5042557 5043076]	[5042855 5043076]	+	AT1G14685	0.000310385	0.0117928	0.00263278	-0.00116506	-0.00014515	3.61963e-05	0.0481301	0.667153	0.136891	0.663847	0.120902	0.0605332	0.855756	0.363248	0.884415	0.327973
A5.1478	A5	1	[5052592 5052666]	[5052592 5052668]	-	AT1G14690	0.0177205	-0.000616925	0.00217011	0.000147272	0.0009719	-4.95371e-06	0.916929	0.720616	0.849544	0.00332517	0.830428	0.935059	0.886361	0.943828	0.0421263	0.931327
A5.1479	A5	1	[5054994 5055077]	[5054994 5055131]	-	AT1G14690	0.0712317	0.448564	0.072124	-0.0116279	-5.57726e-05	1.87768e-05	1.45897e-09	0.343113	0.232233	0.989278	0.948378	2.74414e-09	0.616639	0.494986	1	0.987837
A5.202	A5	1	[5059385 5059472]	[5058967 5059472]	+	AT1G14700	0.000791506	0.988523	-0.00577541	0.000420869	0.000410432	-1.98666e-05	0	0.395626	0.628505	0.268489	0.443374	0	0.664691	0.826492	0.619047	0.682501
A5.201	A5	1	[5059629 5059725]	[5059621 5059725]	+	AT1G14700	0.281224	0.125952	0.301694	0.00592355	-0.00127938	-0.00015059	0.0211529	7.34985e-08	0.408804	0.675665	0.48096	0.0275935	1.25415e-06	0.667203	0.890589	0.709142
A5.204	A5	1	[5059635 5059725]	[5059621 5059725]	+	AT1G14700	0.0481798	0.691764	0.0120815	0.00925953	0.0026136	-0.000486734	1.53473e-09	0.919843	0.551851	0.698085	0.307825	2.88444e-09	0.978954	0.773926	0.902173	0.563876
A5.203	A5	1	[5059629 5059725]	[5059635 5059725]	+	AT1G14700	0.128158	0.0709624	0.113277	-0.000436167	0.000930074	9.58608e-05	0.25536	0.0767544	0.957522	0.789958	0.694404	0.29305	0.235923	0.990995	0.942849	0.857008
A5.1480	A5	1	[5064811 5064971]	[5064811 5064906]	-	AT1G14710	0.186705	0.17547	0.0125951	-0.0182923	0.0108819	0.000501589	7.31086e-10	0.666509	9.98797e-07	8.80362e-12	6.73314e-06	1.38769e-09	0.855522	2.81419e-05	1.16638e-09	0.000137665
A5.1482	A5	1	[5088442 5088614]	[5088442 5088700]	-	AT1G14770	0.00547665	0.979329	0.0181874	-0.000909311	-0.00079442	5.86838e-05	0	0.156733	0.57999	0.256855	0.230666	0	0.382592	0.793643	0.605764	0.482022
A5.2266	A5	1	[5113503 5113656]	[5113503 5113611]	-	AT1G14830_and_AT1G14840	0.000175427	0.999925	0.000315768	-3.50854e-05	-8.77135e-06	1.37052e-06	0	0.388461	0.453879	0.660576	0.32615	0	0.657526	0.703381	0.88342	0.578859
A5.1483	A5	1	[5117029 5117151]	[5117029 5117147]	-	AT1G14850	0.0407106	0.00712406	0.0303034	-0.000503865	0.000650446	2.2761e-05	0.548402	0.012831	0.746395	0.327545	0.623924	0.589537	0.0610816	0.892643	0.675193	0.811701
A5.1485	A5	1	[5164347 5164536]	[5164347 5164531]	-	AT1G14970	0.490607	0.232906	0.686079	0.00953105	-0.0105268	-0.000128547	0.135893	4.89162e-05	0.62084	0.203359	0.814737	0.161981	0.000502652	0.82125	0.541505	0.923226
A5.1486	A5	1	[5174771 5174856]	[5174771 5174866]	-	AT1G15020	0.0140312	0.993078	0.00212355	-0.000276405	0.000744228	-3.06708e-05	0	0.685954	0.680802	0.00938759	0.125524	0	0.867114	0.856555	0.0882868	0.335352
A5.2268	A5	1	[5184112 5184228]	[5184112 5184201]	-	AT1G15060_and_AT1G15050	0.0055153	0.0151886	-0.00667042	0.000238532	0.000761608	-8.408e-06	0.0661885	0.431601	0.826016	0.0997698	0.794829	0.0819351	0.695347	0.932495	0.384703	0.913257
A5.2267	A5	1	[5184761 5184962]	[5184761 5185047]	-	AT1G15060_and_AT1G15050	0.0653831	-0.000780644	0.0546948	0.00116771	0.000668017	-3.66189e-05	0.951326	3.06114e-05	0.486644	0.350656	0.464065	0.966433	0.000328956	0.728841	0.693693	0.696407
A5.205	A5	1	[5187823 5188072]	[5187817 5188072]	+	AT1G15080	0.0087472	0.120785	0.0025732	-0.00621863	0.000408108	0.000139859	0.000167174	0.938741	0.150093	0.83847	0.300242	0.000256205	0.985017	0.383629	0.958728	0.560278
A5.210	A5	1	[5199266 5199567]	[5199431 5199567]	+	AT1G15110	0.000656806	-0.00139404	0.00222641	0.00105264	-9.81003e-05	-3.3222e-05	0.789076	0.677078	0.123812	0.736601	0.103073	0.817941	0.861404	0.340993	0.919643	0.296242
A5.206	A5	1	[5200602 5200687]	[5200586 5200687]	+	AT1G15110	0.124766	0.116316	0.060624	-0.0015336	0.00400888	7.51719e-05	0.00511177	0.154888	0.778514	0.0846676	0.643586	0.00705831	0.379987	0.910151	0.351753	0.825608
A5.209	A5	1	[5200607 5200687]	[5200586 5200687]	+	AT1G15110	0.0176992	0.831441	-0.130554	-0.0248417	0.00653193	0.000194895	1.00413e-15	0.179669	0.0369463	0.191857	0.56347	2.17822e-15	0.418826	0.155429	0.527023	0.770219
A5.208	A5	1	[5200602 5200687]	[5200607 5200687]	+	AT1G15110	0.143675	0.0144699	0.0537086	0.0035803	0.00562289	0.000177391	0.662984	0.114856	0.411346	0.00247956	0.171909	0.70015	0.310196	0.669088	0.0338604	0.403576
A5.207	A5	1	[5201685 5201780]	[5201681 5201780]	+	AT1G15110	0.000268481	0.975099	0.00486581	0.00119203	-0.000287333	-1.52311e-05	0	0.511472	0.208701	0.477291	0.589811	0	0.752417	0.464836	0.783768	0.787536
A5.952	A5	1	[5203093 5203483]	[5203092 5203483]	+	AT1G15120_and_AT1G15125	0.00288708	0.992295	0.0033072	-0.000934731	-2.62574e-05	3.70175e-05	0	0.0246964	6.98067e-07	0.743756	4.25262e-11	0	0.102563	2.06967e-05	0.923079	2.77397e-09
A5.2271	A5	1	[5218310 5218520]	[5218310 5218531]	-	AT1G15165_and_AT1G15175	0.0064758	-0.0155318	0.0430676	0.0116171	-0.00228699	-0.000235944	0.761311	0.411635	0.0834565	0.424195	0.238039	0.792357	0.679185	0.266649	0.747255	0.490413
A5.2269	A5	1	[5218627 5218723]	[5218627 5218742]	-	AT1G15165_and_AT1G15175	0.00155419	0.0005092	-0.001382	-5.90282e-05	0.000183512	2.45169e-06	0.762489	0.423989	0.789536	0.0516479	0.709843	0.793333	0.689908	0.915212	0.265178	0.865526
A5.2270	A5	1	[5219711 5219795]	[5219711 5219949]	-	AT1G15165_and_AT1G15175	0.00112373	0.000244034	-0.000924725	-1.84581e-05	0.000128029	1.04561e-06	0.845635	0.472065	0.91067	0.0679981	0.831091	0.869854	0.728439	0.970937	0.311132	0.931608
A5.2274	A5	1	[5223652 5224032]	[5223652 5223732]	-	AT1G15165_and_AT1G15175	0.0115733	-0.00116967	-0.0315662	0.00942065	0.00269622	-0.000229155	0.970875	0.336832	0.0250674	0.132647	0.0673999	0.984314	0.610294	0.118399	0.447816	0.224616
A5.212	A5	1	[5243907 5244050]	[5243911 5244050]	+	AT1G15240	0.0249279	0.00949933	-0.0112058	-0.000698995	0.00225835	1.73505e-05	0.133997	0.0848704	0.400854	1.94728e-10	0.484012	0.159842	0.252314	0.6603	2.11085e-08	0.711424
A5.211	A5	1	[5246062 5246147]	[5246050 5246147]	+	AT1G15240	0.00626157	0.961512	0.00891595	0.000234799	-0.000165899	-9.88825e-06	0	0.386355	0.858485	0.767649	0.801029	0	0.657526	0.948127	0.933536	0.916021
A5.2276	A5	1	[5279194 5279481]	[5279194 5279306]	-	AT1G15340_and_AT1G15350	0.000178637	0.0245218	-0.00203179	-0.00121767	0.000138152	1.54418e-05	1.40283e-19	0.464726	0.000615696	0.362187	0.144965	3.24828e-19	0.722804	0.00676267	0.702761	0.364459
A5.213	A5	1	[5298386 5298572]	[5298339 5298572]	+	AT1G15410	0.066751	0.775589	-0.0100547	-0.00153035	0.00480035	-0.000157369	1.4351e-22	0.901688	0.883168	0.279677	0.612036	3.4612e-22	0.97189	0.958905	0.630906	0.803381
A5.1488	A5	1	[5322960 5323157]	[5322960 5323152]	-	AT1G15490	0.441283	0.286299	0.585298	0.0102683	-0.00900092	-1.33121e-05	9.36709e-10	3.29246e-34	0.0944737	0.000586595	0.941996	1.77133e-09	3.87938e-32	0.289888	0.0109017	0.984955
A5.224	A5	1	[5365069 5365164]	[5365081 5365164]	+	AT1G15570	0.0219477	-0.0024117	0.00435261	0.000482455	0.0010997	-1.42813e-05	0.857564	0.752201	0.784437	0.143673	0.785808	0.880575	0.901846	0.912655	0.464324	0.908462
A5.225	A5	1	[5384217 5384380]	[5384088 5384380]	+	AT1G15660	0.00537536	0.979621	-0.00223939	0.000566112	0.000475922	-3.12869e-05	0	0.791079	0.600675	0.30208	0.331608	0	0.923183	0.807491	0.65287	0.584144
A5.1489	A5	1	[5420179 5420836]	[5420179 5420279]	-	AT1G15750	0.00214955	0.0926445	-0.033196	-0.00256562	0.0022091	1.20368e-05	2.70243e-13	0.0106914	0.123076	0.00184716	0.80816	5.57505e-13	0.0529244	0.339996	0.0269261	0.919464
A5.1490	A5	1	[5420431 5420836]	[5420431 5420538]	-	AT1G15750	0.000156883	0.0495415	0.000815491	-0.000633873	-4.1163e-05	-1.70741e-05	4.89302e-22	0.876944	0.346843	0.886078	0.395078	1.17195e-21	0.962933	0.613795	0.975857	0.64325
A5.1491	A5	1	[5441967 5442162]	[5441967 5443248]	-	AT1G15800	0.0041763	0.947504	-0.0033236	-0.000360595	0.000468743	3.31747e-05	0	0.709847	0.752374	0.336121	0.329958	0	0.880369	0.896335	0.681733	0.582533
A5.226	A5	1	[5456437 5456503]	[5456410 5456503]	+	AT1G15860	0.000269467	0.999344	-0.000642373	3.58113e-05	5.699e-05	-1.87355e-06	0	0.285142	0.641409	0.08218	0.413496	0	0.556908	0.833242	0.344992	0.657193
A5.960	A5	1	[5479723 5479791]	[5479263 5479791]	+	AT1G15885_and_MSTRG.1777_and_AT1G15910_and_AT1G15890_and_AT1G15900_and_AT1G15920_and_AT1G15930_and_AT1G15940_and_AT1G15950	0.000835153	0.997502	0.000398152	6.01794e-05	2.73126e-05	-9.01404e-07	0	0.311401	0.23174	0.20306	0.547716	0	0.584673	0.494358	0.541278	0.758673
A5.227	A5	1	[5505462 5505568]	[5505354 5505568]	+	AT1G16040	0.0252456	0.865527	0.039446	-0.000782008	-0.000887527	5.7945e-05	0	0.0790743	0.785539	0.468908	0.4986	0	0.240826	0.913171	0.777887	0.72278
A5.229	A5	1	[5509383 5509593]	[5509155 5509593]	+	AT1G16060	0.00123788	0.995384	0.00368798	0.000166551	-0.000153131	2.3881e-07	0	0.0733531	0.527354	0.172928	0.975735	0	0.22861	0.757428	0.501117	0.999757
A5.230	A5	1	[5557215 5557369]	[5557216 5557369]	+	AT1G16250	0.000423842	0.000806378	0.00282648	7.25538e-06	-0.000150165	-1.73213e-07	0.674799	0.151704	0.977055	0.162699	0.981614	0.711332	0.375077	0.999785	0.493445	1
A5.231	A5	1	[5558842 5559078]	[5558702 5559078]	+	AT1G16250	0.009404	0.985587	0.0190003	-0.000915701	-0.000599772	2.70016e-05	0	0.0617574	0.481643	0.279749	0.48619	0	0.202032	0.725015	0.630906	0.71259
A5.1494	A5	1	[5560915 5561010]	[5560915 5560983]	-	AT1G16260	0.0561029	0.811046	0.0774191	0.00301005	-0.00133226	3.18244e-05	5.36253e-291	0.000693416	0.302616	0.284614	0.714526	2.52978e-290	0.0052718	0.573745	0.63555	0.867693
A5.232	A5	1	[5563200 5563717]	[5563364 5563717]	+	AT1G16270	0.0769683	0.527188	0.0481764	0.00349288	0.0017995	-0.000373027	3.29157e-18	0.43831	0.660513	0.595654	0.115432	7.46969e-18	0.701418	0.844883	0.853746	0.31823
A5.234	A5	1	[5574907 5575012]	[5574925 5575012]	+	AT1G16300	0.0153188	0.0288882	0.00970491	-5.43716e-05	0.000350868	6.63444e-05	0.174476	0.656546	0.984464	0.768225	0.425192	0.205011	0.848913	1	0.933756	0.666998
A5.233	A5	1	[5575190 5575335]	[5575203 5575335]	+	AT1G16300	0.0493532	0.947019	0.0131222	-0.000540648	0.00226444	-4.26079e-05	0	0.530886	0.840072	0.0474548	0.593507	0	0.76675	0.938837	0.252748	0.789877
A5.1496	A5	1	[5590025 5590234]	[5590025 5590240]	-	AT1G16340	7.22374e-05	1.00098	-0.000787486	-0.000248985	5.37327e-05	7.0072e-06	0	0.451123	0.0625743	0.345945	0.0785922	0	0.71171	0.221943	0.689761	0.248479
A5.1497	A5	1	[5620230 5620311]	[5620230 5620330]	-	AT1G16460	0.147762	0.0489548	0.0531563	-0.00506059	0.00591283	0.000167779	0.00036038	0.000159429	0.00495923	1.37198e-14	0.0017699	0.000542161	0.00145072	0.0355951	2.67311e-12	0.015053
A5.1500	A5	1	[5622050 5622372]	[5622050 5622468]	-	AT1G16460	0.00346572	0.935051	0.0145617	-0.000446367	-0.000693497	8.60337e-05	0	0.0692639	0.663372	0.112754	0.00486834	0	0.219608	0.846646	0.410303	0.0335782
A5.1499	A5	1	[5622050 5622372]	[5622050 5622478]	-	AT1G16460	0.259635	0.233812	0.0676936	-0.0380773	0.00922407	0.00171181	0.000612491	0.343421	2.87216e-05	0.0271721	1.16306e-09	0.000908556	0.617081	0.000509335	0.178532	5.7978e-08
A5.1498	A5	1	[5622050 5622468]	[5622050 5622478]	-	AT1G16460	0.0255408	0.0211595	-0.00768135	-0.00293504	0.00207638	9.67969e-05	0.00110811	0.248451	0.000567281	1.074e-08	0.000136111	0.0016138	0.514079	0.00631466	8.18821e-07	0.00185804
A5.961	A5	1	[5660706 5660916]	[5660767 5660916]	+	AT1G16540_and_AT1G16550	0.0493679	0.738844	0.113742	0.00467938	-0.0040234	-0.000111163	1.85832e-80	0.00436557	0.359363	0.064569	0.46491	6.34554e-80	0.0252891	0.623636	0.302404	0.696898
A5.236	A5	1	[5668709 5668918]	[5668464 5668918]	+	AT1G16560	0.00101314	0.993992	0.00344468	0.000528889	-0.000151971	-1.08871e-05	0	0.0804789	0.0359403	0.157503	0.147292	0	0.24366	0.152489	0.486041	0.368442
A5.237	A5	1	[5668739 5668918]	[5668464 5668918]	+	AT1G16560	0.00309588	0.996866	-0.00397439	0.00055341	0.000441892	-2.8129e-05	0	0.201597	0.164581	0.00925134	0.0177445	0	0.449989	0.404933	0.0874667	0.08847
A5.235	A5	1	[5668739 5668918]	[5668709 5668918]	+	AT1G16560	0.455188	0.279138	0.430653	-0.00574792	0.002152	0.000394776	0.00308256	3.40648e-06	0.634719	0.673504	0.267536	0.00434207	4.3827e-05	0.829769	0.889471	0.525118
A5.239	A5	1	[5668739 5668944]	[5668464 5668944]	+	AT1G16560	0.0028702	0.994771	0.00469096	0.000211611	-0.000113797	-3.05668e-06	0	0.223159	0.667552	0.588034	0.835054	0	0.481098	0.848964	0.849927	0.934245
A5.238	A5	1	[5669409 5669492]	[5669413 5669492]	+	AT1G16560	5.85518e-05	-8.05088e-05	0.000105393	1.4638e-05	-2.92759e-06	-4.57436e-07	0.499137	0.388461	0.349168	0.660576	0.32615	0.541774	0.657526	0.614605	0.88342	0.578859
A5.1501	A5	1	[5676006 5676107]	[5676006 5676281]	-	AT1G16610	0.0101359	1.0004	0.00382005	-0.00185726	0.000394741	3.82272e-05	0	0.369566	0.000650241	0.0892084	0.0185018	0	0.64263	0.00708986	0.361794	0.0911935
A5.1502	A5	1	[5676495 5676760]	[5676495 5676727]	-	AT1G16610	0.000923734	0.00458568	9.23147e-05	-0.000349969	5.19637e-05	7.52399e-06	0.0311538	0.966268	0.210178	0.662586	0.365913	0.0399765	0.996102	0.466627	0.884254	0.61724
A5.962	A5	1	[5706616 5706705]	[5706601 5706705]	+	AT1G16680_and_AT1G16690_and_AT1G16700_and_AT1G16705	0.0946953	0.029117	0.0900496	-0.00121095	0.000290358	4.10812e-05	0.502359	0.0431612	0.831684	0.904865	0.808783	0.544914	0.156013	0.935255	0.981711	0.919731
A5.243	A5	1	[5714342 5714512]	[5713963 5714512]	+	AT1G16710	0.00069572	0.992272	-0.000974007	0.00207772	0.000104358	-9.50847e-05	0	0.934995	0.173866	0.872735	0.0367362	0	0.983365	0.418587	0.970538	0.148342
A5.240	A5	1	[5714358 5714512]	[5713963 5714512]	+	AT1G16710	0.17671	0.563738	0.0991877	-0.0157788	0.00484513	0.000688863	1.81641e-22	0.0944373	0.0375731	0.134262	0.002312	4.37377e-22	0.271029	0.157157	0.450867	0.018562
A5.241	A5	1	[5714342 5714512]	[5714358 5714512]	+	AT1G16710	0.24222	0.655659	0.363497	0.000100801	-0.0075798	0.000184592	5.16828e-72	3.07441e-22	0.98323	0.000209819	0.19639	1.71356e-71	1.9667e-20	1	0.00472767	0.437516
A5.242	A5	1	[5715520 5715723]	[5715637 5715723]	+	AT1G16710	0.112592	0.569774	0.219129	0.0135058	-0.00665856	-8.62035e-05	7.26073e-31	1.48836e-05	0.0369689	0.0158649	0.654964	1.91035e-30	0.000169667	0.15548	0.12622	0.832609
A5.2283	A5	1	[5743829 5744111]	[5743829 5744138]	-	AT1G16780_and_AT1G16800	0.178783	0.0536694	0.198628	0.00701597	-0.00124035	-0.000269767	0.144265	1.38428e-07	0.14589	0.546559	0.0605731	0.171397	2.26236e-06	0.377208	0.828482	0.209757
A5.2284	A5	1	[5753759 5753858]	[5753759 5753864]	-	AT1G16780_and_AT1G16800	0.103734	0.726139	0.120065	-0.00665825	-0.00105508	0.000144412	3.31815e-22	0.120256	0.501481	0.808077	0.628558	7.96793e-22	0.319987	0.739471	0.949237	0.814418
A5.244	A5	1	[5755672 5756139]	[5755819 5756139]	+	AT1G16810	0.000736893	0.00287281	5.32956e-05	-0.000188885	4.27248e-05	5.92964e-06	0.0842099	0.975089	0.387047	0.646341	0.362111	0.103046	0.999963	0.648914	0.880038	0.613639
A5.1503	A5	1	[5777938 5778034]	[5777938 5778061]	-	AT1G16890	0.000211865	0.998645	0.000166287	9.52976e-05	2.84863e-06	-3.44373e-06	0	0.615719	0.0245579	0.874763	0.00639609	0	0.823567	0.11659	0.971392	0.041576
A5.245	A5	1	[5799880 5800161]	[5800031 5800161]	+	AT1G16960	0.0547354	0.781736	0.0764048	0.00184366	-0.00135434	-4.56358e-05	7.98984e-26	0.316809	0.85025	0.744986	0.875367	1.9993e-25	0.590268	0.94416	0.923707	0.953143
A5.1504	A5	1	[5802158 5802287]	[5802158 5802251]	-	AT1G16970	0.011772	0.0549499	-0.0140044	-0.000885399	0.00161102	-4.16292e-05	0.000958917	0.412005	0.68519	0.0836506	0.522364	0.0014033	0.679607	0.858966	0.348661	0.739958
A5.1506	A5	1	[5848119 5848211]	[5848119 5848199]	-	AT1G17110	0.104039	0.0939924	-0.0188529	0.0151875	0.00768073	-0.000349019	0.00060857	0.502742	2.4455e-05	5.59214e-07	0.00113552	0.000902965	0.746533	0.000445057	2.83506e-05	0.0106179
A5.1505	A5	1	[5850045 5850458]	[5850045 5850641]	-	AT1G17110	0.0264958	0.946762	0.0158106	0.00136783	0.00066783	-7.08823e-05	0	0.0572554	0.198552	0.140981	0.0253461	0	0.191279	0.45182	0.460865	0.113996
A5.246	A5	1	[5941842 5942347]	[5941846 5942347]	+	AT1G17350	0.33664	0.440734	0.486451	-0.00773777	-0.00936316	0.000675029	1.76141e-07	1.91914e-08	0.484796	0.0474184	0.0408111	3.10219e-07	3.51411e-07	0.727324	0.252599	0.159609
A5.247	A5	1	[5941842 5942380]	[5941846 5942380]	+	AT1G17350	0.0125898	0.344852	-0.060537	-0.000334706	0.00457043	-0.000160958	9.21552e-11	0.267563	0.961787	0.12495	0.439355	1.79177e-10	0.537035	0.992144	0.434223	0.679068
A5.248	A5	1	[5943903 5944083]	[5943879 5944083]	+	AT1G17350	0.000282184	0.998832	0.000658859	4.63537e-05	-2.35422e-05	-7.85692e-07	0	0.506153	0.714669	0.663234	0.835248	0	0.748619	0.874058	0.884335	0.934322
A5.249	A5	1	[5946978 5947381]	[5946974 5947381]	+	AT1G17360	0.013654	0.989982	-0.048726	0.0033769	0.00389875	-0.00025164	1.50337e-86	0.344142	0.608343	0.165291	0.199984	5.23605e-86	0.617871	0.81256	0.49674	0.442355
A5.2286	A5	1	[5953842 5954217]	[5953842 5954206]	-	AT1G17370_and_AT1G17380	0.00787017	0.000983678	0.0069536	0.00016772	5.72854e-05	-6.46784e-06	0.300813	1.00686e-12	0.178921	0.281645	0.0819308	0.341258	3.03483e-11	0.425675	0.632575	0.255599
A5.2285	A5	1	[5953842 5954217]	[5953842 5954233]	-	AT1G17370_and_AT1G17380	0.00530789	0.00181487	0.00042059	-0.000235663	0.000305456	7.98233e-06	0.023155	0.607965	0.0246672	8.54731e-12	0.010652	0.0300907	0.818509	0.116979	1.14258e-09	0.0609086
A5.1509	A5	1	[5968886 5969011]	[5968886 5969057]	-	AT1G17410	0.0209876	0.957036	0.0313677	0.00168925	-0.00064876	-3.31333e-05	0	0.000180098	0.114906	0.155625	0.299361	0	0.0016132	0.326627	0.482949	0.559495
A5.1508	A5	1	[5969165 5969258]	[5969165 5969262]	-	AT1G17410	0.227986	0.679704	0.161188	-0.00181061	0.00417487	-6.05587e-05	1.34138e-157	6.29851e-10	0.587248	0.00333158	0.542298	5.43518e-157	1.42026e-08	0.79866	0.0421359	0.754675
A5.250	A5	1	[6004505 6004633]	[6004509 6004633]	+	AT1G17470	0.00594051	0.995302	0.00366003	-0.000531006	0.00014253	7.97834e-06	0	0.0848167	0.0506673	0.218622	0.324388	0	0.252228	0.193179	0.561137	0.578859
A5.1510	A5	1	[6025378 6025504]	[6025378 6025522]	-	AT1G17520	0.143502	0.443558	0.140863	-0.0148853	0.000164911	0.000383709	2.33108e-75	1.29862e-08	2.64672e-06	0.902879	4.84111e-05	7.83156e-75	2.45011e-07	6.5585e-05	0.981185	0.000772971
A5.2288	A5	1	[6052052 6052408]	[6052052 6052403]	-	AT1G17590_and_AT1G17600	0.195505	0.381175	-0.0680459	-0.00152788	0.0164719	0.000160332	1.22906e-07	0.357385	0.871682	4.42974e-05	0.569447	2.17541e-07	0.630319	0.953928	0.00125404	0.773997
A5.2293	A5	1	[6071040 6071127]	[6071040 6071123]	-	AT1G17665_and_AT1G17650	0.177575	0.0698265	0.147513	-0.00846144	0.00187884	0.000302775	0.00183956	1.413e-10	0.00402963	0.134242	0.000552948	0.00263806	3.40627e-09	0.0304418	0.450852	0.00595729
A5.251	A5	1	[6077247 6077486]	[6077256 6077486]	+	AT1G17680	0.0061293	0.0024376	0.012455	0.000504285	-0.000395359	8.26474e-06	0.776651	0.157681	0.654781	0.411012	0.805727	0.80638	0.384057	0.841388	0.73839	0.918182
A5.1511	A5	1	[6086319 6086420]	[6086319 6086406]	-	AT1G17690	0.0393347	0.0310637	-0.000367595	-0.0012801	0.00248139	5.69299e-05	0.0399339	0.981094	0.518922	0.00336529	0.335678	0.0506479	1	0.751989	0.0424721	0.588517
A5.1512	A5	1	[6095923 6096215]	[6095923 6096212]	-	AT1G17720	0.00624288	0.358577	0.0412556	-0.00346336	-0.0021883	0.000351163	2.13908e-68	0.0499902	0.198414	0.0566863	1.20601e-05	7.00418e-68	0.173542	0.451583	0.280189	0.000230456
A5.253	A5	1	[6123817 6124065]	[6123672 6124065]	+	AT1G17780	0.0573805	0.723784	0.116031	0.0124509	-0.00315789	-0.000141148	2.83837e-40	0.0306601	0.0611685	0.262055	0.463488	8.05138e-40	0.120945	0.219189	0.611209	0.696225
A5.252	A5	1	[6124157 6124253]	[6123817 6124253]	+	AT1G17780	0.00240692	-0.00147328	0.00219575	0.000267869	1.31986e-05	-8.3709e-06	0.587849	0.431089	0.452814	0.93087	0.431063	0.627643	0.695017	0.703381	0.991008	0.672421
A5.1513	A5	1	[6147937 6148046]	[6147937 6148052]	-	AT1G17850	0.000375099	-0.000515761	7.50197e-05	9.37747e-05	1.87549e-05	-2.93046e-06	0.499137	0.923661	0.349168	0.660576	0.32615	0.541774	0.978957	0.614605	0.88342	0.578859
A5.1514	A5	1	[6168454 6168729]	[6168454 6168676]	-	AT1G17930	0.0297077	-0.0181133	0.00265241	0.00331366	0.00169095	-9.34696e-05	0.351377	0.894177	0.193981	0.120076	0.218829	0.393958	0.969467	0.445793	0.423657	0.467555
A5.1515	A5	1	[6172056 6172463]	[6172056 6172235]	-	AT1G17940	0.00143878	0.00278191	-0.00190116	-0.0002126	0.000208746	4.77067e-06	0.282174	0.473739	0.531202	0.149335	0.637226	0.321532	0.730016	0.760508	0.473784	0.820904
A5.1516	A5	1	[6172499 6172714]	[6172499 6173043]	-	AT1G17940	0.00686693	0.972461	0.00898686	0.000988054	-0.000132496	-8.20475e-06	0	0.213549	0.285117	0.736755	0.765782	0	0.466727	0.555215	0.919686	0.896955
A5.969	A5	1	[6204977 6205086]	[6204985 6205086]	+	AT1G18020_and_AT1G18010_and_AT1G18030	0.378538	0.681728	0.292446	-0.016275	0.00538074	0.000291695	7.63262e-187	3.50021e-34	1.14243e-07	3.93398e-05	0.00142483	3.2301e-186	4.10793e-32	4.08345e-06	0.00113856	0.0126562
A5.971	A5	1	[6205274 6205434]	[6205277 6205434]	+	AT1G18020_and_AT1G18010_and_AT1G18030	0.0140873	-0.00293361	0.0193974	0.000938668	-0.000331885	-1.96917e-05	0.624978	0.00163005	0.233417	0.323117	0.401482	0.663742	0.0109837	0.49655	0.671368	0.648435
A5.970	A5	1	[6206218 6206319]	[6206214 6206319]	+	AT1G18020_and_AT1G18010_and_AT1G18030	0.0113803	0.973969	0.0207675	0.000728697	-0.000586701	-5.08623e-06	0	0.00136785	0.379956	0.0973559	0.837046	0	0.00946066	0.642598	0.379782	0.93499
A5.254	A5	1	[6225148 6225245]	[6225152 6225245]	+	AT1G18090	0.00338401	0.00163157	0.00798977	-0.00029665	-0.00028786	9.2703e-06	0.667024	0.0400077	0.551192	0.175012	0.531929	0.704007	0.147384	0.773558	0.50354	0.747245
A5.1518	A5	1	[6229165 6229280]	[6229165 6229291]	-	AT1G18100	0.093764	0.720737	0.29886	0.0129293	-0.0115693	-0.000191291	3.50411e-13	0.0260474	0.347075	0.0754877	0.644191	7.20099e-13	0.106673	0.614015	0.328653	0.826121
A5.1520	A5	1	[6286659 6286737]	[6286659 6286797]	-	AT1G18270	8.96674e-06	0.999702	5.47342e-05	-4.2396e-06	-2.86047e-06	5.61727e-07	0	0.865132	0.9181	0.87075	0.64749	0	0.957329	0.973728	0.969751	0.828541
A5.1519	A5	1	[6290320 6290743]	[6290320 6290704]	-	AT1G18270	0.0603006	0.014843	0.0507974	-0.00140295	0.00059395	5.42869e-05	0.00965571	5.97209e-18	0.0623764	0.0642691	0.0155113	0.0130202	2.84845e-16	0.22164	0.301615	0.0803044
A5.2295	A5	1	[6309454 6309528]	[6309454 6309587]	-	AT1G18340_and_AT1G18335	0.0369875	0.983579	0.0176669	-0.00196176	0.00120754	1.881e-05	0	0.308999	0.377265	0.202455	0.776308	0	0.581977	0.64016	0.540739	0.902892
A5.2294	A5	1	[6309778 6309960]	[6309778 6309953]	-	AT1G18340_and_AT1G18335	0.150913	0.131818	0.123336	-0.0017378	0.00172358	4.18554e-05	5.27902e-08	6.94327e-07	0.584681	0.20362	0.658626	9.46287e-08	1.02161e-05	0.796951	0.541766	0.834728
A5.255	A5	1	[6326623 6328428]	[6328219 6328428]	+	AT1G18390	0.000913472	0.153582	0.00308221	-0.0018364	-0.000135546	-4.08781e-06	4.34798e-57	0.75542	0.146887	0.801734	0.9137	1.35877e-56	0.903597	0.378658	0.94701	0.971656
A5.2298	A5	1	[6344692 6344784]	[6344692 6344771]	-	AT1G18410_and_AT1G18415	0.0384823	0.694045	-0.0354012	-0.0141062	0.00461772	0.000280957	3.7157e-30	0.570502	0.0772509	0.174958	0.237572	9.70092e-30	0.794395	0.253506	0.503524	0.489975
A5.972	A5	1	[6346776 6346889]	[6346768 6346889]	+	AT1G18420_and_AT1G18430_and_AT1G18440	0.0650137	0.0581797	0.00781244	-0.000161516	0.00357508	0.000310806	0.0504832	0.797948	0.967003	0.0317608	0.00754738	0.063359	0.927097	0.99487	0.19674	0.0471573
A5.1522	A5	1	[6359434 6359941]	[6359434 6359944]	-	AT1G18470	0.0352733	0.328742	0.0190197	-0.00688641	0.00101585	0.000216789	1.25563e-29	0.523807	0.0712231	0.532551	0.0566407	3.26076e-29	0.7611	0.241763	0.819753	0.20053
A5.256	A5	1	[6385653 6385802]	[6385705 6385802]	+	AT1G18560	0.00733666	0.0151617	0.0176426	-0.00190029	-0.000659447	5.59745e-05	0.271327	0.212104	0.296032	0.399991	0.302095	0.30999	0.465084	0.567068	0.729918	0.562006
A5.973	A5	1	[6409839 6410557]	[6410059 6410557]	+	AT1G18610_and_AT1G18620_and_AT1G18630	0.0194644	0.937467	0.0119108	-0.000598331	0.000472098	5.80207e-05	0	0.282472	0.673028	0.434878	0.16963	0	0.553871	0.853163	0.755506	0.400306
A5.974	A5	1	[6410216 6410557]	[6410059 6410557]	+	AT1G18610_and_AT1G18620_and_AT1G18630	0.0107116	0.985929	0.000114117	0.000542155	0.000662346	-7.54995e-05	0	0.992621	0.731276	0.325133	0.10847	0	1	0.883788	0.673017	0.306493
A5.975	A5	1	[6433670 6434161]	[6433688 6434161]	+	AT1G18690_and_AT1G18700	0.0855997	0.747073	0.119702	0.00508973	-0.0021314	-4.85863e-05	0	2.29718e-09	0.047054	0.0511465	0.524636	0	4.81567e-08	0.183741	0.263785	0.741837
A5.977	A5	1	[6434470 6434909]	[6434416 6434909]	+	AT1G18690_and_AT1G18700	0.00979275	0.790592	0.00516866	0.0103473	0.000289006	-0.000157482	5.52834e-92	0.89686	0.0425257	0.894302	0.300167	1.9533e-91	0.970325	0.171402	0.978579	0.560278
A5.976	A5	1	[6438374 6438487]	[6438385 6438487]	+	AT1G18690_and_AT1G18700	0.00261287	-0.00281773	0.0151699	0.000472408	-0.000784813	1.42478e-05	0.515661	0.000646479	0.406357	0.00121635	0.400644	0.557882	0.0049554	0.665311	0.0194758	0.647892
A5.980	A5	1	[6440068 6440188]	[6440030 6440188]	+	AT1G18690_and_AT1G18700	0.000249583	0.98006	-0.00153286	0.00047458	0.000111403	3.84516e-06	0	0.739198	0.420465	0.657402	0.826597	0	0.895315	0.67737	0.88342	0.929423
A5.257	A5	1	[6461073 6461173]	[6461069 6461173]	+	AT1G18730	0.299371	0.0213742	0.305754	-0.00185915	-0.000398995	5.86156e-05	0.0436812	4.65559e-174	0.181311	0.501081	0.157228	0.0551847	8.16371e-171	0.428958	0.800537	0.382578
A5.258	A5	1	[6461389 6461993]	[6461910 6461993]	+	AT1G18730	0.00210965	0.0119962	0.00262188	2.33164e-05	-3.20141e-05	-7.78291e-06	3.186e-14	0.105857	0.910504	0.717397	0.207951	6.70677e-14	0.293488	0.970922	0.910824	0.453576
A5.259	A5	1	[6467178 6467262]	[6467169 6467262]	+	AT1G18750	0.0386316	0.250773	-0.0178632	0.0204026	0.00353093	-0.00048969	0.00223236	0.83188	0.05807	0.441783	0.126857	0.00318024	0.943836	0.212167	0.760692	0.337614
A5.2299	A5	1	[6503950 6504080]	[6503950 6504070]	-	AT1G18840_and_AT1G18850	0.223513	0.298709	0.198851	0.00673068	0.00154142	-4.69708e-05	5.21742e-11	2.0467e-05	0.259766	0.545003	0.79182	1.02142e-10	0.000227158	0.527028	0.827524	0.911502
A5.260	A5	1	[6529643 6529776]	[6529181 6529776]	+	AT1G18900	0.00425862	0.947042	0.0252429	0.000803442	-0.00131152	7.67996e-06	0	0.0225616	0.570445	0.0298452	0.855561	0	0.0955748	0.786938	0.188943	0.943801
A5.981	A5	1	[6550669 6550762]	[6550681 6550762]	+	AT1G18950_and_AT1G18960	0.530679	0.494737	0.425297	-0.0017717	0.00658641	-0.000230555	4.3643e-109	3.64278e-77	0.544914	1.30491e-07	0.00819166	1.61015e-108	1.50821e-74	0.769493	7.6124e-06	0.0501607
A5.982	A5	1	[6550669 6550768]	[6550681 6550768]	+	AT1G18950_and_AT1G18960	0.119834	0.0504077	0.169899	-0.0056409	-0.0031291	0.000154225	0.143979	1.58322e-06	0.212862	0.105102	0.253004	0.171071	2.16788e-05	0.470275	0.394796	0.508448
A5.261	A5	1	[6597468 6597914]	[6597802 6597914]	+	AT1G19100	0.0175429	0.134432	0.0102843	-0.00256852	0.000453663	-4.20482e-05	2.19065e-11	0.61772	0.329935	0.686542	0.592458	4.33046e-11	0.825048	0.598429	0.896364	0.78915
A5.262	A5	1	[6685885 6685973]	[6685903 6685973]	+	AT1G19340	0.0360784	0.0933213	-0.0721816	-0.0102807	0.0066908	0.00030502	0.0357331	0.118182	0.079222	0.0104392	0.087879	0.0455488	0.315929	0.257817	0.0948163	0.26745
A5.263	A5	1	[6688738 6688833]	[6688644 6688833]	+	AT1G19350	0.0958441	0.70743	0.0110605	0.0080887	0.00157023	-0.00105878	2.52826e-38	0.842558	0.272385	0.631649	1.62183e-06	7.07212e-38	0.948508	0.541184	0.872609	3.9989e-05
A5.984	A5	1	[6711527 6711607]	[6711494 6711607]	+	AT1G19394_and_AT1G19396_and_AT1G19397	0.0954172	0.0501832	0.0445356	-0.00608957	0.0031801	0.000233739	0.0218933	0.0473791	0.0340754	0.00944843	0.00633405	0.0285145	0.166986	0.14687	0.0886583	0.0412898
A5.1525	A5	1	[6712437 6712535]	[6712437 6712980]	-	AT1G19400	0.00337794	0.992884	0.00357285	-0.000275677	-1.21817e-05	1.05735e-05	0	0.00664458	0.101662	0.865303	0.0351143	0	0.0357536	0.302813	0.967437	0.143608
A5.1524	A5	1	[6713787 6714085]	[6713787 6714168]	-	AT1G19400	0.00198074	0.966108	0.00422449	0.000995345	-0.000140234	2.00164e-06	0	0.44223	0.157033	0.640085	0.923909	0	0.704608	0.394271	0.877153	0.976761
A5.264	A5	1	[6748158 6748247]	[6748163 6748247]	+	AT1G19485	0.274102	0.694625	0.285305	-0.0117814	-0.00070018	0.000421465	2.88789e-60	5.52912e-11	0.0343475	0.768055	0.0110689	9.17001e-60	1.416e-09	0.1476	0.933657	0.0625881
A5.2302	A5	1	[6811927 6812203]	[6811927 6812500]	-	AT1G19690_and_AT1G19700	0.036188	0.798013	0.106536	-0.00437018	-0.00428182	0.00031132	1.95042e-67	0.0251089	0.471767	0.0968066	0.0867916	6.36265e-67	0.103799	0.71719	0.378533	0.265255
A5.2303	A5	1	[6811927 6812203]	[6811927 6812539]	-	AT1G19690_and_AT1G19700	0.01546	1.00008	-0.00642264	-0.00135647	0.00135074	-1.37501e-05	0	0.557948	0.335999	0.0261819	0.743698	0	0.785942	0.603324	0.174644	0.885192
A5.2300	A5	1	[6811927 6812500]	[6811927 6812539]	-	AT1G19690_and_AT1G19700	0.0154252	0.77796	-0.0414287	0.0078175	0.00355336	-0.000755368	6.70501e-81	0.322759	0.144741	0.120042	2.25231e-06	2.29137e-80	0.596441	0.375785	0.423628	5.33716e-05
A5.2306	A5	1	[6819313 6819429]	[6819313 6819411]	-	AT1G19715_and_AT1G19730_and_AT1G19720	0.00292264	0.00110377	0.0123282	-0.000209833	-0.000587844	1.40963e-05	0.817326	0.0119105	0.737962	0.0279464	0.450672	0.844464	0.0574888	0.88783	0.18146	0.687272
A5.2305	A5	1	[6819313 6819715]	[6819313 6819429]	-	AT1G19715_and_AT1G19730_and_AT1G19720	0.0327588	0.554323	0.0113835	0.0251429	0.00133596	-0.000423253	1.60613e-119	0.641716	9.53435e-16	0.316841	5.67104e-06	6.04607e-119	0.840283	1.55411e-13	0.666561	0.000119727
A5.265	A5	1	[6846628 6846730]	[6846470 6846730]	+	AT1G19800	0.00484818	0.983086	0.0114466	-0.000870786	-0.000412402	3.69625e-05	0	0.208328	0.454395	0.406023	0.28653	0	0.459542	0.70373	0.734127	0.546313
A5.1527	A5	1	[6859513 6859698]	[6859513 6859889]	-	AT1G19835	0.0242108	1.01226	0.0118496	-0.0241498	0.00069364	0.000750895	6.66806e-48	0.870523	0.0104039	0.868006	0.00854118	1.98339e-47	0.960212	0.0623774	0.96828	0.051677
A5.1528	A5	1	[6859513 6859698]	[6859513 6860097]	-	AT1G19835	0.000293577	0.999421	-0.00130223	-0.000159032	9.97382e-05	4.94855e-06	0	0.476725	0.497003	0.317795	0.478121	0	0.732045	0.736373	0.667381	0.70715
A5.1529	A5	1	[6859513 6859889]	[6859513 6860097]	-	AT1G19835	0.00197212	0.992277	0.00848929	-0.000679378	-0.000407323	3.39603e-05	0	0.0546284	0.229324	0.0909807	0.0437237	0	0.184844	0.491835	0.365724	0.167612
A5.1532	A5	1	[6893236 6893369]	[6893236 6894346]	-	AT1G19860	0.00172407	0.977295	0.0181278	0.000216808	-0.00102523	-3.55964e-06	0	0.170273	0.897997	0.155132	0.943686	0	0.404933	0.965659	0.482318	0.985852
A5.1531	A5	1	[6893236 6894346]	[6893236 6893513]	-	AT1G19860	0.00613474	0.00697158	0.0284911	-0.000933052	-0.00139727	0.000115467	0.666694	0.0862185	0.660545	0.122991	0.0681534	0.703684	0.254978	0.844883	0.429919	0.226418
A5.266	A5	1	[6914113 6914189]	[6913786 6914189]	+	AT1G19910	9.04953e-05	0.99896	0.000254055	-0.000102763	-1.02225e-05	2.89483e-06	0	0.483644	0.0267944	0.605416	0.0362888	0	0.736165	0.124081	0.859239	0.14724
A5.269	A5	1	[6945380 6945504]	[6945385 6945504]	+	AT1G20030	0.000875775	1.00002	-0.00122609	8.75775e-05	0.000131366	-6.84199e-06	0	0.4863	0.697509	0.171525	0.308136	0	0.736165	0.864472	0.499234	0.563876
A5.268	A5	1	[6945423 6945504]	[6945385 6945504]	+	AT1G20030	0.0028314	0.99866	-0.00898043	0.000648925	0.000738239	-3.845e-05	0	0.0730744	0.311392	0.00691682	0.0441068	0	0.228099	0.582821	0.0713461	0.168785
A5.270	A5	1	[6949580 6949666]	[6949576 6949666]	+	AT1G20050	0.0156806	-0.00290171	0.0237249	0.000527583	-0.000502772	-1.6487e-05	0.352509	1.26507e-13	0.197783	0.00399779	0.176774	0.395108	4.23251e-12	0.450886	0.0480153	0.410696
A5.1533	A5	1	[6952224 6952305]	[6952224 6952308]	-	AT1G20060	0.633187	0.112405	0.631408	0.00386329	-0.000380047	0.000120635	0.166907	3.93515e-13	0.739406	0.948419	0.759853	0.196605	1.24927e-11	0.888599	0.996243	0.894063
A5.1535	A5	1	[6952571 6952652]	[6952571 6952655]	-	AT1G20060	0.564287	0.417369	0.529019	-0.0205352	0.00217915	0.00085272	2.84826e-08	6.29877e-11	0.0583247	0.688439	0.0210117	5.15398e-08	1.60759e-09	0.21268	0.897427	0.0999396
A5.1537	A5	1	[6954048 6954161]	[6954048 6954156]	-	AT1G20060	0.000852356	0.000887188	0.00264478	-0.000183846	-0.000139186	6.73402e-06	0.580551	0.123601	0.422673	0.230118	0.387437	0.620406	0.326211	0.67917	0.575248	0.636721
A5.2307	A5	1	[7008824 7009064]	[7008824 7009058]	-	AT1G20220_and_AT1G20225	0.0598855	0.00575394	0.0547506	-0.000746067	0.000320927	2.30963e-05	0.163217	2.94729e-38	0.168386	0.164668	0.152399	0.192526	4.01182e-36	0.410299	0.496133	0.37561
A5.272	A5	1	[7062363 7062435]	[7062331 7062435]	+	AT1G20380	0.0854712	0.0134457	0.0961942	-0.00158143	-0.000670182	5.02341e-05	0.764544	0.0367307	0.788395	0.789664	0.774775	0.795305	0.138688	0.914618	0.942849	0.901943
A5.273	A5	1	[7113306 7113438]	[7113293 7113438]	+	AT1G20540	0.0490128	0.0894194	-0.0203108	-0.00183231	0.00433273	0.000159311	1.48954e-06	0.286627	0.452449	3.0923e-05	0.0283479	2.52895e-06	0.558544	0.703381	0.000924587	0.123934
A5.274	A5	1	[7114021 7114224]	[7114113 7114224]	+	AT1G20540	0.074999	0.0911509	0.0294551	-0.00633536	0.0028465	0.000235992	8.3323e-13	0.0242007	0.000151177	6.53426e-05	2.16803e-06	1.69918e-12	0.10098	0.00211676	0.00174696	5.16207e-05
A5.275	A5	1	[7143156 7144206]	[7144105 7144206]	+	AT1G20620	0.000643335	0.0010118	0.000440237	4.35455e-05	1.26936e-05	-1.8249e-06	1.06475e-07	0.0241757	0.0813585	0.233467	0.0142325	1.88839e-07	0.100893	0.262053	0.578859	0.0754292
A5.277	A5	1	[7154549 7155169]	[7154829 7155169]	+	AT1G20640	0.00648747	0.924444	0.0124387	0.00134662	-0.00037195	3.22605e-05	0	0.46764	0.538821	0.690544	0.621197	0	0.72519	0.765392	0.898742	0.809555
A5.278	A5	1	[7154829 7155169]	[7154554 7155169]	+	AT1G20640	0.127931	0.0597066	0.131694	-0.00508626	-0.000235188	0.000409216	0.483516	0.131958	0.649293	0.96067	0.219479	0.526948	0.341405	0.837936	1	0.468294
A5.276	A5	1	[7154829 7155169]	[7155089 7155169]	+	AT1G20640	0.00286701	0.00174124	0.00101915	0.000655938	0.000115491	-2.53606e-05	0.74718	0.854081	0.354868	0.702439	0.229934	0.779037	0.952778	0.620131	0.903988	0.481243
A5.280	A5	1	[7177626 7177797]	[7177522 7177797]	+	AT1G20693	0.00255393	0.992957	-0.00363025	0.000471994	0.000386511	-3.43689e-05	0	0.0015758	0.00131992	6.92465e-10	4.2029e-15	0	0.0106712	0.0127546	6.79026e-08	4.87504e-13
A5.281	A5	1	[7180425 7180536]	[7180412 7180536]	+	AT1G20696	0.0925633	0.0169447	0.0508061	-0.0027238	0.00260982	8.69094e-05	0.00901379	2.30065e-14	0.00138239	6.63179e-13	0.000614852	0.0121855	8.37393e-13	0.0132405	1.03411e-10	0.00646973
A5.282	A5	1	[7217407 7217793]	[7217405 7217793]	+	AT1G20780	0.0092521	0.982933	0.0114687	-0.000232076	-0.000138537	8.8579e-06	0	0.0478828	0.754349	0.66134	0.688541	0	0.168202	0.897167	0.883822	0.853482
A5.284	A5	1	[7217636 7217793]	[7217405 7217793]	+	AT1G20780	0.00516633	1.0023	-0.0110457	-0.00154159	0.00101325	1.14435e-05	0	0.100135	0.0728811	0.00569736	0.654987	0	0.283012	0.245102	0.0621208	0.832609
A5.988	A5	1	[7232289 7232550]	[7232320 7232550]	+	AT1G20810_and_AT1G20816	0.0702808	0.0937009	0.0419528	-0.00167496	0.00177049	0.000181974	1.10288e-08	0.0126385	0.43645	0.0537135	0.00454619	2.01971e-08	0.0603193	0.690619	0.270564	0.0318575
A5.285	A5	1	[7243922 7244094]	[7243926 7244094]	+	AT1G20830	0.00185017	0.91119	0.000590787	0.00225328	7.87114e-05	-0.000132696	0	0.973392	0.320075	0.935079	0.0493909	0	0.99903	0.590253	0.992477	0.182424
A5.1539	A5	1	[7248214 7248312]	[7248214 7248333]	-	AT1G20840	0.0910405	0.871978	0.118524	0.0017545	-0.00171774	-2.10956e-05	8.2911e-304	7.96248e-07	0.567913	0.189739	0.817725	3.95515e-303	1.16069e-05	0.785309	0.524326	0.924503
A5.1541	A5	1	[7266644 7266767]	[7266644 7266736]	-	AT1G20890	0.00220548	0.88979	-0.00263335	-0.00559377	0.000302427	4.19908e-05	0	0.895131	0.0286324	0.781404	0.581378	0	0.969757	0.129798	0.938655	0.782398
A5.991	A5	1	[7289288 7289385]	[7289014 7289385]	+	AT1G20920_and_AT1G20925	0.0617199	0.770538	0.0188426	-0.00340375	0.00267983	3.27623e-05	1.88856e-111	0.592845	0.450268	0.16332	0.807317	7.00135e-111	0.80919	0.701829	0.494482	0.919032
A5.989	A5	1	[7289309 7289385]	[7289014 7289385]	+	AT1G20920_and_AT1G20925	0.112448	0.870958	0.0259398	-0.0149919	0.00540677	-0.000222527	5.70301e-80	0.582491	0.0130141	0.0356916	0.216037	1.94538e-79	0.801998	0.0738392	0.211315	0.463414
A5.990	A5	1	[7289309 7289385]	[7289288 7289385]	+	AT1G20920_and_AT1G20925	0.0354955	0.623739	0.0249238	-0.0139178	0.000660729	-0.000142885	2.60408e-32	0.644845	0.0442413	0.822769	0.488197	6.94592e-32	0.842515	0.17622	0.954089	0.713966
A5.286	A5	1	[7337921 7338006]	[7337925 7338006]	+	AT1G21000	0.0111977	0.0147401	-0.0134881	-0.0026644	0.00154286	8.35449e-05	0.48063	0.529288	0.331401	0.187153	0.306705	0.524916	0.765324	0.598649	0.52094	0.563876
A5.1542	A5	1	[7381864 7382023]	[7381864 7382188]	-	AT1G21080	0.000751073	0.999258	0.000462073	-0.000136161	1.80625e-05	2.86599e-06	0	0.630193	0.26748	0.73011	0.433424	0	0.832826	0.534996	0.916528	0.674494
A5.1543	A5	1	[7420487 7420696]	[7420487 7420739]	-	AT1G21190	0.0571002	0.867179	0.11637	0.00235085	-0.00370435	6.93193e-05	0	5.05704e-45	0.0262055	2.11181e-16	0.0277992	0	8.92014e-43	0.122022	5.335e-14	0.122136
A5.1545	A5	1	[7420487 7420739]	[7420487 7420706]	-	AT1G21190	0.00306626	0.00830456	0.00362733	0.000568258	-3.50669e-05	-3.07102e-05	0.00825211	0.260724	0.168471	0.842027	0.0124961	0.0111979	0.529741	0.410438	0.959722	0.0686789
A5.992	A5	1	[7423481 7423638]	[7423003 7423638]	+	AT1G21200_and_AT1G21210	0.00344568	1.00469	-0.00193781	-0.00290866	0.000336468	9.20598e-05	0	0.873497	0.0617697	0.612328	0.0472323	0	0.961307	0.220512	0.862647	0.176884
A5.1546	A5	1	[7477126 7477335]	[7477126 7477331]	-	AT1G21350	0.00135117	-0.00177292	-0.00111788	0.000519603	0.000154316	-1.72414e-05	0.499242	0.677934	0.13137	0.293341	0.0929211	0.541868	0.861888	0.353812	0.64356	0.277088
A5.288	A5	1	[7481735 7482134]	[7482003 7482134]	+	AT1G21360	0.007736	0.00593384	0.0103606	0.000145919	-0.000164035	3.47556e-05	0.488947	0.238911	0.896847	0.732507	0.300028	0.532381	0.501899	0.965094	0.9175	0.560278
A5.287	A5	1	[7482269 7482598]	[7482265 7482598]	+	AT1G21360	0.000994069	0.928598	0.0254013	0.00224648	-0.00152545	-6.85425e-05	0	0.0633845	0.199389	0.0409895	0.18881	0	0.205827	0.45286	0.230523	0.427855
A5.1547	A5	1	[7488075 7488603]	[7488075 7488491]	-	AT1G21380	0.0265293	0.832035	0.0751404	0.0120497	-0.00303819	-0.000209225	0	9.86725e-16	8.0564e-24	2.67488e-09	4.51306e-09	0	3.98028e-14	3.93707e-21	2.31797e-07	2.02918e-07
A5.993	A5	1	[7493725 7494443]	[7494177 7494443]	+	AT1G21400_and_AT1G21410	0.0034113	0.00161646	0.00326885	0.000297697	8.90323e-06	-6.09839e-06	0.113035	0.00178574	0.0261807	0.876069	0.126333	0.136117	0.0118665	0.121926	0.971853	0.33667
A5.994	A5	1	[7494282 7494443]	[7493725 7494443]	+	AT1G21400_and_AT1G21410	0.00134264	0.985672	0.00463644	-0.000100599	-0.000205863	1.52961e-05	0	6.15173e-05	0.496802	0.00110955	0.000524932	0	0.000617451	0.736176	0.0181337	0.00572147
A5.995	A5	1	[7494282 7494443]	[7494177 7494443]	+	AT1G21400_and_AT1G21410	0.148007	0.153708	0.196994	0.00212803	-0.00306168	0.000350705	0.000298889	6.2532e-06	0.702878	0.198084	0.0348782	0.000451591	7.66751e-05	0.867453	0.534911	0.142998
A5.1548	A5	1	[7503064 7503173]	[7503064 7503178]	-	AT1G21440	0.112303	0.00548885	0.113673	0.00394395	-8.557e-05	-0.00014215	0.775363	8.37766e-09	0.11824	0.936643	0.0587947	0.805211	1.62484e-07	0.332042	0.993041	0.20564
A5.289	A5	1	[7555007 7555182]	[7554975 7555182]	+	AT1G21560	0.0256933	0.641876	-0.0635279	-0.0124189	0.00557632	0.000422397	8.80305e-35	0.235288	0.0697654	0.0561813	0.0384451	2.39718e-34	0.497265	0.238486	0.278154	0.152908
A5.290	A5	1	[7556360 7556539]	[7556348 7556539]	+	AT1G21560	0.0106226	0.92885	0.0532098	-0.00257395	-0.0026617	0.000184115	8.16311e-308	0.0362456	0.428486	0.0548322	0.0573241	3.9066e-307	0.137291	0.684296	0.273839	0.202133
A5.291	A5	1	[7578165 7578250]	[7578162 7578250]	+	AT1G21610	0.00228731	0.998576	0.00237748	-0.000288643	-5.63516e-06	9.31178e-06	0	0.0914437	0.109237	0.941543	0.0828959	0	0.265115	0.316814	0.99402	0.25757
A5.996	A5	1	[7584276 7584694]	[7584286 7584694]	+	AT1G21630_and_AT1G21640	0.00940733	0.0244721	0.0175231	-0.0011877	-0.000507233	1.21689e-05	1.55294e-06	0.000798735	0.075662	0.0752027	0.541295	2.63463e-06	0.00594069	0.250554	0.327919	0.753949
A5.2309	A5	1	[7599941 7600029]	[7599941 7600017]	-	AT1G21650_and_AT1G21651	0						1	1	1	1	1	1	1	1	1	1
A5.292	A5	1	[7615883 7616027]	[7615847 7616027]	+	AT1G21690	0.00221557	0.00652022	-0.00572415	-0.000981359	0.000496232	3.04221e-05	0.313527	0.388433	0.247803	0.170526	0.229203	0.354709	0.657526	0.513585	0.499234	0.480467
A5.293	A5	1	[7631961 7632089]	[7632005 7632089]	+	AT1G21730	0.00636663	0.037198	0.000266437	0.00109075	0.000381262	-7.99928e-05	0.000698302	0.981116	0.448815	0.534686	0.0622935	0.00103128	1	0.700889	0.821258	0.213476
A5.294	A5	1	[7649521 7649719]	[7649333 7649719]	+	AT1G21760	0.000293697	0.997787	0.00133218	3.38739e-05	-6.49052e-05	1.69307e-06	0	0.236864	0.814143	0.290795	0.693323	0	0.499287	0.926569	0.641293	0.856419
A5.295	A5	1	[7652275 7652373]	[7652256 7652373]	+	AT1G21780	0.133134	0.189444	0.161997	0.0141089	-0.00180399	-0.000414332	0.064014	0.122643	0.29331	0.752669	0.300315	0.0793751	0.324228	0.564155	0.926923	0.560294
A5.1555	A5	1	[7780613 7781222]	[7780613 7780725]	-	AT1G22060	0.00577467	0.0121926	0.0124923	-0.000674444	-0.00041985	9.80931e-06	5.74824e-07	5.94337e-07	0.03512	0.0020979	0.303722	9.92211e-07	8.8233e-06	0.149968	0.0296902	0.563688
A5.1554	A5	1	[7780613 7781101]	[7780613 7781222]	-	AT1G22060	0.00204018	0.998365	0.00094439	-0.000370633	6.84869e-05	1.14712e-05	0	0.664304	0.183117	0.564013	0.166726	0	0.854015	0.431998	0.837162	0.396498
A5.296	A5	1	[7789656 7789988]	[7789753 7789988]	+	AT1G22070	0.0361582	0.00656676	-0.0362715	0.00299221	0.00452686	-7.82049e-05	0.846001	0.295693	0.500147	0.0167438	0.554221	0.87014	0.568538	0.738783	0.130458	0.763251
A5.1558	A5	1	[7829556 7829670]	[7829556 7830150]	-	AT1G22180	0.0441677	0.20303	-0.00145213	0.02685	-0.00109414	-5.71442e-05	0.0566137	0.990802	0.0721956	0.86165	0.899409	0.0706427	1	0.243696	0.965907	0.964159
A5.1559	A5	1	[7838114 7838211]	[7838114 7838207]	-	AT1G22200	0.000120536	0.00174056	-0.000298995	-0.000203567	2.62207e-05	5.58907e-06	0.023577	0.704624	0.0436652	0.542273	0.0630463	0.0306191	0.877358	0.174719	0.826102	0.215109
A5.298	A5	1	[7874642 7874730]	[7874660 7874730]	+	AT1G22280	0.0011042	0.00205463	4.18136e-05	0.000111392	6.63994e-05	-5.19386e-06	0.227008	0.98088	0.617773	0.485435	0.434867	0.262556	1	0.819192	0.789684	0.675937
A5.1560	A5	1	[7879151 7879224]	[7879151 7879249]	-	AT1G22300	0.0112185	0.958566	0.0146779	-0.00235253	-0.000216212	8.51288e-05	0	0.034248	0.00799621	0.567554	0.00127719	0	0.131505	0.0510531	0.839216	0.0116932
A5.299	A5	1	[7887912 7887990]	[7887569 7887990]	+	AT1G22330	0.00373687	0.957142	0.0218857	0.00321544	-0.0011343	-0.000116806	0	0.0707402	0.0379681	0.0860082	0.0114046	0	0.222986	0.158279	0.354326	0.0639522
A5.1561	A5	1	[7952164 7952506]	[7952164 7952448]	-	AT1G22510	0.000803136	0.00470092	-0.001344	-0.000571833	0.000134196	1.87996e-05	0.047859	0.581354	0.0666959	0.312872	0.0430428	0.0602101	0.801246	0.231591	0.663011	0.165776
A5.1562	A5	1	[7967415 7967493]	[7967415 7967539]	-	AT1G22550	0.0315131	0.0348237	0.0602257	-0.00199793	-0.00179454	4.96106e-05	7.57322e-05	2.53142e-11	0.0836535	0.000268545	0.149407	0.000118291	6.72563e-10	0.267193	0.00582992	0.371467
A5.1563	A5	1	[8000971 8001095]	[8000971 8001073]	-	AT1G22620	0.259981	0.0180332	0.129862	0.000597696	0.00813243	-4.59518e-07	0.623507	0.000569432	0.901349	7.63992e-05	0.997448	0.662275	0.00443321	0.966916	0.00198905	1
A5.300	A5	1	[8006628 8006708]	[8006621 8006708]	+	AT1G22640	0.193671	0.029197	0.224334	0.0027276	-0.00191641	-0.000105619	0.0436843	1.45449e-51	0.151095	0.0179999	0.0620707	0.0551862	3.21174e-49	0.385464	0.137057	0.213064
A5.301	A5	1	[8028015 8028131]	[8028059 8028131]	+	AT1G22690	0.0184392	0.766991	0.0367374	0.0114758	-0.00114364	-0.000226828	1.94965e-17	0.691585	0.332762	0.820915	0.520533	4.36558e-17	0.869733	0.600098	0.953448	0.738948
A5.997	A5	1	[8049795 8049980]	[8049884 8049980]	+	AT1G22730_and_AT1G22740_and_AT1G22750	0.0486535	0.978838	-0.0117884	-0.000162509	0.00377762	-0.000133011	0	0.0175655	0.798056	3.20608e-44	2.08706e-12	0	0.0784694	0.919031	4.77866e-40	1.70921e-10
A5.999	A5	1	[8069641 8070164]	[8070085 8070164]	+	AT1G22790_and_AT1G05767_locus1	0.00563885	0.0198751	0.00796922	-0.000224115	-0.000145648	-4.08289e-06	0.00494707	0.272008	0.809208	0.712879	0.882637	0.00684199	0.542223	0.923879	0.909028	0.956547
A5.998	A5	1	[8072211 8072306]	[8072213 8072306]	+	AT1G22790_and_AT1G05767_locus1	0.00923025	0.0113623	0.0106912	-0.000722481	-9.13096e-05	4.67754e-05	0.140971	0.176931	0.475726	0.832585	0.121216	0.167672	0.414582	0.7206	0.956966	0.328526
A5.302	A5	1	[8080112 8080187]	[8080108 8080187]	+	AT1G22840	6.69907e-05	0.999925	7.73054e-05	-4.57778e-07	-6.44665e-07	2.27342e-08	0	0.233665	0.95604	0.855542	0.926796	0	0.494915	0.99029	0.963531	0.978183
A5.1000	A5	1	[8085469 8086014]	[8085486 8086014]	+	AT1G22860_and_AT1G22870	0.0715927	0.844676	0.119919	0.00261752	-0.00302037	2.04896e-05	4.28723e-234	6.15608e-06	0.440531	0.0368658	0.839421	1.91206e-233	7.56718e-05	0.694155	0.215358	0.936526
A5.1002	A5	1	[8086503 8086912]	[8086466 8086912]	+	AT1G22860_and_AT1G22870	0.176048	0.704879	0.261543	0.00566378	-0.00534341	2.51244e-05	1.39617e-135	3.15393e-19	0.12924	0.000788878	0.821305	5.4462e-135	1.66996e-17	0.350178	0.0138088	0.926345
A5.1001	A5	1	[8090353 8090459]	[8090357 8090459]	+	AT1G22860_and_AT1G22870	0.0732616	0.21378	0.128856	-0.00933955	-0.00347463	0.000320724	4.46441e-06	0.00702007	0.126696	0.182686	0.0783718	7.41002e-06	0.037376	0.345925	0.514539	0.248037
A5.303	A5	1	[8102956 8103112]	[8102996 8103112]	+	AT1G22890	0.0910957	0.076832	-0.00451585	-0.011566	0.00597572	0.000434809	7.74666e-09	0.740798	3.54283e-11	1.02505e-15	6.53505e-17	1.42627e-08	0.896307	2.74317e-09	2.38724e-13	9.7405e-15
A5.304	A5	1	[8107523 8107612]	[8107519 8107612]	+	AT1G22910	0.041297	0.500433	0.0631897	0.00747791	-0.00136829	-0.000335079	2.22366e-46	0.0784177	0.103552	0.48483	0.01436	6.55272e-46	0.239389	0.306543	0.789423	0.0758995
A5.305	A5	1	[8122841 8122923]	[8122838 8122923]	+	AT1G22940	0.0028228	0.0287111	0.00424236	-0.00154434	-8.87227e-05	8.18773e-05	0.0123886	0.718696	0.305423	0.890174	0.0682079	0.0165526	0.885589	0.576427	0.976624	0.226473
A5.1568	A5	1	[8182128 8182217]	[8182128 8182205]	-	AT1G23080	0.430888	0.265942	0.383605	0.000226866	0.00295521	3.9643e-05	9.36296e-49	1.38694e-94	0.924016	0.00357232	0.575926	2.7995e-48	7.95091e-92	0.976352	0.0444452	0.778419
A5.1575	A5	1	[8202652 8202761]	[8202652 8202757]	-	AT1G23140	0.00597388	0.00835291	0.00146863	-2.08575e-05	0.000281578	2.92599e-05	0.473898	0.902315	0.98913	0.666213	0.521223	0.518233	0.97189	1	0.885678	0.739226
A5.1004	A5	1	[8246298 8246562]	[8246303 8246562]	+	AT1G23210_and_AT1G23220_and_AT1G23230	0.358271	0.0164457	0.321219	0.00482236	0.00231578	-0.000134718	0.644908	1.7228e-18	0.303219	0.246256	0.334395	0.683254	8.53099e-17	0.574304	0.593818	0.587098
A5.1576	A5	1	[8258324 8258394]	[8258324 8258545]	-	AT1G23260	0.00211909	1.00042	-0.00331584	-0.000168482	0.000339683	-7.98428e-06	0	0.0401214	0.414994	0.000116116	0.194817	0	0.147657	0.672356	0.0028583	0.435657
A5.1577	A5	1	[8296158 8296253]	[8296158 8296241]	-	AT1G23360	0.269461	0.577861	0.364425	0.0028173	-0.00593522	0.000146941	2.20291e-147	7.08775e-57	0.336892	2.08873e-06	0.092757	8.7863e-147	1.92078e-54	0.604147	9.05529e-05	0.276884
A5.1578	A5	1	[8312895 8313169]	[8312895 8313152]	-	AT1G23400	0.0574932	0.0557852	0.0658515	0.00286899	-0.000522393	-3.43331e-05	2.73608e-07	3.31435e-09	0.0439791	0.389709	0.41851	4.7784e-07	6.82326e-08	0.175645	0.723499	0.661565
A5.307	A5	1	[8334604 8334719]	[8334609 8334719]	+	AT1G23480	0.0880251	0.922735	0.0749502	-0.00102427	0.000817182	-1.58077e-06	0	2.42282e-10	0.498831	0.20571	0.972054	0	5.70041e-09	0.737755	0.544361	0.998375
A5.1580	A5	1	[8354152 8354333]	[8354152 8354324]	-	AT1G23560	0.0331884	1.05515	-0.105882	-0.00789553	0.00637644	-1.81319e-05	1.20115e-19	0.246399	0.475658	0.137161	0.945303	2.78324e-19	0.511587	0.7206	0.455478	0.986709
A5.309	A5	1	[8397751 8397846]	[8397747 8397846]	+	AT1G23730	0.0207478	0.917448	0.0231321	0.00691297	-0.00063975	-0.00016192	0	0.440735	0.00147423	0.631159	0.0143363	0	0.703522	0.0139647	0.872469	0.0758279
A5.310	A5	1	[8410830 8410905]	[8410834 8410905]	+	AT1G23790	0.0618475	0.0463482	0.0487296	0.00394852	0.00132245	-8.86213e-05	0.43613	0.427601	0.637208	0.746732	0.732443	0.480772	0.692409	0.830942	0.924129	0.878177
A5.312	A5	1	[8421722 8421818]	[8421729 8421818]	+	AT1G23820	0.00529298	0.0023227	-0.00114497	-0.00038889	0.000402372	1.23039e-05	0.0308563	0.299564	0.00588827	2.3497e-11	0.0034528	0.0396118	0.572235	0.0407355	2.99336e-09	0.0254961
A5.311	A5	1	[8422367 8422447]	[8422363 8422447]	+	AT1G23820	0.00819846	0.719977	0.0126517	-0.00192096	-0.000278326	6.60123e-05	0	0.288388	0.207696	0.668566	0.146193	0	0.560639	0.463614	0.886718	0.366836
A5.2313	A5	1	[8428399 8428616]	[8428399 8428604]	-	AT1G23850_and_AT1G23860	0.00126989	0.990713	0.00130324	0.000553371	-2.08426e-06	-1.08719e-05	0	0.51269	0.0298055	0.984688	0.15197	0	0.753464	0.133389	1	0.374917
A5.1582	A5	1	[8470602 8470683]	[8470602 8470698]	-	AT1G23950	0.0374906	0.13875	0.0336828	-0.00618307	0.00023799	0.000385786	1.15234e-16	0.0498588	0.00489526	0.799494	3.80713e-09	2.54586e-16	0.173227	0.035213	0.945901	1.73533e-07
A5.1583	A5	1	[8483009 8483090]	[8483009 8483105]	-	AT1G23970	0.0592576	0.0804313	0.0329634	0.000725525	0.00164339	0.000199986	0.0080144	0.289498	0.85541	0.333053	0.0918452	0.0108882	0.561486	0.946927	0.679261	0.275443
A5.313	A5	1	[8503502 8503601]	[8503460 8503601]	+	AT1G24030	0.0389299	0.75203	0.0407059	-0.0112524	-0.000226969	5.06309e-05	2.8193e-27	0.566135	0.219692	0.953337	0.853103	7.17216e-27	0.791654	0.47947	0.997667	0.942948
A5.1585	A5	1	[8555849 8556144]	[8555849 8556139]	-	AT1G24160	0.144033	0.108479	0.0458332	-0.0102878	0.00613751	0.000342321	4.72983e-07	0.0380392	0.000273279	3.54473e-07	4.81742e-05	8.19317e-07	0.142117	0.00348139	1.88694e-05	0.000769599
A5.2314	A5	1	[8568637 8568734]	[8568637 8568746]	-	AT1G24180_and_AT1G24190	0.0156809	0.0130017	-0.00855483	-0.00228808	0.00151473	7.53559e-05	0.0982515	0.288948	0.0266353	0.000577993	0.0142727	0.119191	0.560996	0.123503	0.0107755	0.0755578
A5.314	A5	1	[8587451 8587555]	[8587470 8587555]	+	AT1G24240	0.0126662	0.0212503	0.0250068	0.00296663	-0.000771283	-8.85366e-05	0.104212	0.0623609	0.0839661	0.292032	0.0834635	0.126016	0.203389	0.267677	0.642406	0.258746
A5.1586	A5	1	[8594697 8594806]	[8594697 8594809]	-	AT1G24260	0.0968081	0.722179	0.0338435	-0.0098945	0.00393529	8.80933e-05	1.33815e-54	0.47719	0.104307	0.129751	0.627418	4.13584e-54	0.732272	0.308152	0.442131	0.814002
A5.1587	A5	1	[8605706 8605847]	[8605706 8605824]	-	AT1G24267	0.0615737	0.0162218	0.0122695	-0.00275245	0.00308151	9.49877e-05	0.234015	0.38027	0.123942	5.36136e-05	0.0747724	0.270136	0.651973	0.341122	0.00147438	0.240576
A5.315	A5	1	[8609762 8609906]	[8609708 8609906]	+	AT1G24280	0.00310806	0.973609	-0.0011804	0.0016198	0.000268029	-4.09992e-05	0	0.874434	0.0900841	0.5107	0.14991	0	0.961877	0.280519	0.805818	0.372129
A5.1007	A5	1	[8636537 8636756]	[8636647 8636756]	+	AT1G24330_and_AT1G24340	0.0108666	0.972036	0.0015737	-0.000429168	0.000580805	1.32835e-05	0	0.769132	0.531557	0.0470722	0.515752	0	0.911498	0.760935	0.251432	0.735274
A5.1588	A5	1	[8639172 8639268]	[8639172 8639284]	-	AT1G24350	0.0347654	0.0739155	0.016251	-0.00543548	0.00105868	0.000121079	0.0075567	0.552193	0.122119	0.473691	0.241002	0.0102856	0.781395	0.3383	0.781259	0.494173
A5.1589	A5	1	[8639172 8639268]	[8639172 8639368]	-	AT1G24350	0.00263173	0.013405	-0.0200953	-0.000921561	0.00141601	1.9401e-05	0.445881	0.247388	0.680021	0.131567	0.767517	0.490619	0.512602	0.855998	0.445479	0.898087
A5.316	A5	1	[8662682 8662896]	[8662419 8662896]	+	AT1G24440	0.000197318	1.00001	0.000173625	-3.40373e-05	1.48082e-06	1.01739e-06	0	0.513701	0.316973	0.918676	0.315436	0	0.754227	0.58765	0.987617	0.570841
A5.1591	A5	1	[8687689 8687762]	[8687689 8687902]	-	AT1G24510	0.00018917	1.0002	-0.000254901	-6.13249e-05	2.77544e-05	1.47789e-06	0	0.552968	0.264557	0.236342	0.366851	0	0.781899	0.531575	0.58229	0.618124
A5.319	A5	1	[8742063 8742150]	[8741900 8742150]	+	AT1G24706	0.126568	0.197396	0.0345367	-0.00416803	0.00575194	2.32496e-05	0.247196	0.843552	0.852321	0.546852	0.972199	0.284196	0.948809	0.945311	0.828526	0.998375
A5.320	A5	1	[8752251 8752374]	[8752255 8752374]	+	AT1G24706	0.00579874	0.0118357	0.00158984	-0.00112981	0.000263056	3.20969e-05	0.029947	0.776234	0.114394	0.388655	0.132253	0.0384826	0.915062	0.325887	0.722814	0.345496
A5.321	A5	1	[8758077 8758276]	[8758048 8758276]	+	AT1G24735	0.0129011	0.969685	0.0241044	0.00158	-0.000804059	-2.31479e-05	0	0.25614	0.564826	0.542548	0.793622	0	0.524166	0.783174	0.826352	0.912476
A5.1593	A5	1	[8761158 8761272]	[8761158 8761282]	-	AT1G24764	0.0204924	0.180713	0.00554604	-0.00930523	0.000934149	0.000115719	1.59971e-32	0.722413	3.18482e-06	0.272739	0.0518549	4.27267e-32	0.887242	7.72494e-05	0.624067	0.188708
A5.1008	A5	1	[8768836 8768902]	[8768808 8768902]	+	AT1G24793_and_AT1G24800	0.0716183	0.0331412	0.0450018	-0.00257122	0.00166353	7.31241e-05	0.160118	0.062994	0.406373	0.207738	0.428069	0.189094	0.204879	0.665311	0.547002	0.669925
A5.322	A5	1	[8860999 8861124]	[8861032 8861124]	+	AT1G25275	0.00263885	0.00107061	0.00101569	9.38424e-06	0.000101448	2.25182e-06	0.0900556	0.116987	0.909872	0.00410539	0.361952	0.109829	0.313522	0.970434	0.0491099	0.613471
A5.1595	A5	1	[8902320 8902446]	[8902320 8902422]	-	AT1G25375	0.00580501	0.0342258	-0.0149905	-0.00115434	0.00129972	1.42989e-05	0.0188194	0.31591	0.546098	0.110959	0.801856	0.0246748	0.589316	0.77034	0.4066	0.916402
A5.323	A5	1	[8916936 8917054]	[8916821 8917054]	+	AT1G25420	0.123608	0.0369017	0.0168546	-0.00421959	0.00667208	0.00027099	0.0534787	0.389942	0.0925151	4.42196e-10	0.000287855	0.0669326	0.65893	0.285545	4.51433e-08	0.00347559
A5.324	A5	1	[8949735 8949828]	[8949698 8949828]	+	AT1G25480	0.00346729	0.051803	-0.0122596	-0.0100399	0.00098293	0.000556568	0.0404824	0.636482	0.00248447	0.487309	1.8179e-08	0.0513217	0.836907	0.0208743	0.790574	7.24011e-07
A5.1596	A5	1	[8956469 8956583]	[8956469 8956575]	-	AT1G25500	0.0102213	0.157148	-0.0973201	0.00459895	0.00672134	0.000122875	0.000144761	0.0218009	0.396865	0.00368543	0.447421	0.000222761	0.0931735	0.656668	0.0453229	0.684826
A5.1597	A5	1	[8957322 8957510]	[8957322 8957727]	-	AT1G25500	0.00919065	0.986392	0.00123389	0.000310131	0.000497298	-1.66301e-05	0	0.845315	0.701513	0.149487	0.490332	0	0.94943	0.866919	0.474015	0.715598
A5.1598	A5	1	[8993055 8993286]	[8993055 8993278]	-	AT1G25570	0.0609566	0.911251	0.0767118	-0.00256376	-0.0009847	2.61342e-05	0	3.17223e-05	0.277099	0.327581	0.710014	0	0.000340159	0.545703	0.675193	0.865599
A5.325	A5	1	[9021285 9021380]	[9021289 9021380]	+	AT1G26090	0.00405858	0.0874193	0.000695534	0.00490047	0.000210191	-5.75485e-05	0.0635055	0.988518	0.42806	0.93646	0.75477	0.0787675	1	0.684025	0.992972	0.891466
A5.1599	A5	1	[9023682 9023826]	[9023682 9023813]	-	AT1G26100	0.0247473	0.899175	0.080206	0.00731577	-0.00346617	-0.000124815	0	1.64077e-07	0.000189312	3.35747e-05	0.032562	0	2.6539e-06	0.00254587	0.000998863	0.136657
A5.326	A5	1	[9036552 9036668]	[9036555 9036668]	+	AT1G26130	0						1	1	1	1	1	1	1	1	1	1
A5.2316	A5	1	[9040775 9040897]	[9040775 9040893]	-	AT1G26150_and_AT1G26160_and_AT1G26140	0.187413	0.1693	0.136704	-0.00901114	0.00316929	0.000261335	1.50887e-09	1.96806e-06	0.0142581	0.0432379	0.0170628	2.8371e-09	2.6427e-05	0.0788706	0.238689	0.0859522
A5.2317	A5	1	[9042930 9043580]	[9042930 9043585]	-	AT1G26150_and_AT1G26160_and_AT1G26140	0.0165735	0.0478785	0.00825033	-6.60085e-05	-0.000266229	-6.23066e-05	0.00310009	0.625062	0.97777	0.833869	0.386906	0.00436593	0.829553	0.999928	0.957094	0.636199
A5.328	A5	1	[9055637 9055719]	[9055611 9055719]	+	AT1G26180	0.0447883	0.00803585	0.0136685	-0.00129148	0.00194498	4.72518e-05	0.436093	0.196611	0.340283	0.000756989	0.241609	0.480748	0.442852	0.60727	0.0133842	0.494736
A5.330	A5	1	[9055763 9055917]	[9055766 9055917]	+	AT1G26180	0.0223034	0.00545786	0.0201943	-0.000999575	0.000131818	5.47206e-05	0.503025	0.0157137	0.350043	0.772569	0.085984	0.545478	0.0718553	0.615367	0.934582	0.263852
A5.329	A5	1	[9055960 9056052]	[9055967 9056052]	+	AT1G26180	0.145073	0.0556118	0.189104	0.00196877	-0.00275195	-0.000127143	0.00186273	6.17684e-25	0.401372	0.00594263	0.068935	0.00266961	4.66156e-23	0.660748	0.0639761	0.227826
A5.2321	A5	1	[9067301 9067380]	[9067301 9067487]	-	AT1G26208_and_AT1G26230_and_AT1G26218	0.0474821	0.825403	-0.0795965	-0.00772071	0.00794241	-0.000374518	1.70518e-118	0.0295978	0.0990881	6.92068e-05	0.00725097	6.40677e-118	0.117751	0.297974	0.00182733	0.045756
A5.2323	A5	1	[9069344 9069433]	[9069344 9069424]	-	AT1G26208_and_AT1G26230_and_AT1G26218	0.0550848	0.0622931	0.0393219	-0.004764	0.000985181	9.91585e-05	0.0248418	0.167385	0.191075	0.526036	0.361083	0.0321915	0.400044	0.441922	0.815919	0.612804
A5.2318	A5	1	[9069523 9070218]	[9069523 9071155]	-	AT1G26208_and_AT1G26230_and_AT1G26218	0.00619959	0.856318	0.0297155	-0.00471434	-0.00146975	0.000193581	9.56879e-306	0.206135	0.116951	0.251706	0.0307351	4.57125e-305	0.456563	0.330159	0.600268	0.131425
A5.2322	A5	1	[9069523 9071155]	[9069523 9070545]	-	AT1G26208_and_AT1G26230_and_AT1G26218	0.000950777	0.010013	-0.00958667	-0.000480002	0.000658591	2.90801e-05	0.276801	0.310134	0.691223	0.201221	0.419313	0.315857	0.583319	0.862316	0.539036	0.662096
A5.2320	A5	1	[9074589 9074677]	[9074589 9074685]	-	AT1G26208_and_AT1G26230_and_AT1G26218	0.0367198	0.121044	0.0297668	-0.00544075	0.000434558	0.00011921	5.58924e-13	0.0839271	0.0135442	0.643721	0.0694172	1.14365e-12	0.250537	0.0760365	0.879197	0.228756
A5.331	A5	1	[9086897 9087152]	[9087046 9087152]	+	AT1G26260	0.060098	0.447625	0.092057	0.00137736	-0.00226395	-3.53845e-05	0.000372712	0.474141	0.935089	0.76326	0.94429	0.000560403	0.730447	0.980643	0.931885	0.986137
A5.1600	A5	1	[9096627 9098940]	[9096627 9098104]	-	AT1G26300	0.00142458	-0.000561813	0.00222099	0.000102148	-4.97755e-05	-3.19212e-06	0.753989	0.227197	0.66421	0.619827	0.648896	0.785449	0.486339	0.847115	0.866834	0.829366
A5.1601	A5	1	[9124865 9124963]	[9124865 9124959]	-	AT1G26370	0.116267	0.0321651	0.0121831	-0.00395021	0.00650523	0.000126041	0.193009	0.630797	0.223233	2.55172e-06	0.192133	0.225411	0.833255	0.484047	0.000107439	0.432198
A5.1602	A5	1	[9145195 9145300]	[9145195 9145285]	-	AT1G26440	0.140328	0.356371	0.0952543	-0.00294562	0.0028562	0.000155416	7.13769e-13	0.0534168	0.638983	0.283147	0.398888	1.45736e-12	0.181984	0.832194	0.633966	0.646593
A5.332	A5	1	[9153487 9153693]	[9153464 9153693]	+	AT1G26460	0.0207611	0.902208	0.0240327	0.00422605	-0.000204478	-6.83981e-05	0	0.0268713	0.00234915	0.729945	0.0984396	0	0.109177	0.0200539	0.916528	0.287634
A5.1013	A5	1	[9212575 9212840]	[9212609 9212840]	+	AT1G26660_and_AT1G26665	0.00137492	0.00651303	0.000682077	-8.52606e-05	4.33028e-05	-3.9557e-06	0.135019	0.878737	0.881503	0.859076	0.816452	0.161016	0.963269	0.958144	0.964814	0.924109
A5.1012	A5	1	[9214903 9214990]	[9214895 9214990]	+	AT1G26660_and_AT1G26665	0.0407779	0.00842099	0.0202401	-0.00136934	0.00128361	4.35141e-05	0.00685364	2.37691e-10	0.00080869	1.7829e-13	0.000353466	0.00936372	5.59681e-09	0.00852002	2.98586e-11	0.00412885
A5.2324	A5	1	[9303439 9303844]	[9303439 9303908]	-	AT1G26850_and_AT1G26880_and_AT1G26860_and_AT1G06033	0.102543	0.63105	0.0555565	-0.000174067	0.00293668	-0.000116769	2.82444e-217	0.00693428	0.947282	0.00889429	0.136582	1.23891e-216	0.036992	0.986429	0.0851988	0.35239
A5.1015	A5	1	[9321753 9322071]	[9321718 9322071]	+	AT1G26910_and_AT1G26911	0.00333555	0.98718	0.00446619	0.000765768	-7.06652e-05	-3.39721e-05	0	0.286294	0.153013	0.75713	0.0333685	0	0.558336	0.38833	0.928981	0.138772
A5.1603	A5	1	[9397729 9397829]	[9397729 9397824]	-	AT1G27070	0.0403676	0.927738	0.0488218	0.0027529	-0.000528387	-6.71424e-05	0	0.00149309	0.161591	0.528646	0.251886	0	0.0101945	0.400817	0.8175	0.50714
A5.340	A5	1	[9435190 9435286]	[9435131 9435286]	+	AT1G27170	0.0193493	0.0238899	-0.0172963	-0.00454803	0.00229035	0.000157695	0.33132	0.492976	0.158828	0.0960935	0.101072	0.373323	0.74067	0.396978	0.37725	0.292346
A5.342	A5	1	[9492101 9492195]	[9492095 9492195]	+	AT1G27320	0.0502019	0.0035122	0.0353121	-0.000362831	0.000930616	1.79502e-05	0.467547	1.08161e-12	0.567469	0.000583068	0.342425	0.511921	3.23074e-11	0.785075	0.0108565	0.595408
A5.345	A5	1	[9501869 9502076]	[9501142 9502076]	+	AT1G27360	0.00908944	0.985791	0.00208148	0.00153208	0.000440431	-6.82928e-05	0	0.853769	0.297224	0.497546	0.123984	0	0.95268	0.568037	0.797899	0.33297
A5.343	A5	1	[9501973 9502076]	[9501142 9502076]	+	AT1G27360	0.023583	0.960408	0.029927	0.0025675	-0.000439353	-8.32264e-05	0	0.153608	0.346897	0.715581	0.312778	0	0.377869	0.613805	0.910357	0.56815
A5.2327	A5	1	[9507023 9508146]	[9507023 9507211]	-	AT1G27370_and_AT1G27380_and_AT1G27385	0.0372284	0.0890663	0.0982673	-0.0109741	-0.00363818	0.000302105	0.0419425	0.0267545	0.0502036	0.131235	0.0665743	0.0530825	0.108807	0.192065	0.445057	0.222936
A5.1604	A5	1	[9514524 9514663]	[9514524 9514813]	-	AT1G27390	0.000517593	0.998577	0.000222271	-7.90689e-05	1.84576e-05	-1.70515e-08	0	0.876002	0.664393	0.812255	0.997495	0	0.962624	0.847241	0.95042	1
A5.1016	A5	1	[9520064 9520140]	[9520068 9520140]	+	AT1G27410_and_AT1G27420	0.0201185	0.889308	0.0617296	0.0025755	-0.00234904	-7.274e-06	5.31646e-155	0.0716513	0.522496	0.170739	0.949128	2.1469e-154	0.225024	0.754555	0.499234	0.988133
A5.346	A5	1	[9533038 9533364]	[9532963 9533364]	+	AT1G27450	4.36453e-05	0.995766	8.3646e-05	0.000169843	-2.50004e-06	-3.7635e-06	0	0.905037	0.0583096	0.947887	0.15911	0	0.972865	0.212651	0.9961	0.385499
A5.1605	A5	1	[9543116 9543268]	[9543116 9543245]	-	AT1G27470	0.00660606	-0.000921019	0.00374641	0.000241851	0.000178728	-2.91201e-06	0.754932	0.215848	0.532313	0.279123	0.800768	0.786266	0.470319	0.761579	0.630783	0.915997
A5.348	A5	1	[9558886 9558969]	[9558882 9558969]	+	AT1G27520	0.0837555	0.917656	0.0823542	-0.000375875	8.75832e-05	1.07134e-05	0	1.02799e-09	0.827595	0.905266	0.834968	0	2.26491e-08	0.933206	0.981852	0.934219
A5.349	A5	1	[9559776 9560017]	[9559935 9560017]	+	AT1G27520	0.0044186	0.00240142	0.00401414	0.000483243	2.52784e-05	-2.62466e-06	0.553186	0.333941	0.363276	0.911195	0.868374	0.59408	0.607436	0.627092	0.984141	0.95087
A5.347	A5	1	[9560597 9560706]	[9560620 9560706]	+	AT1G27520	0.149217	0.418218	0.169582	0.0044124	-0.00127283	2.3205e-05	1.58529e-74	5.23475e-13	0.142068	0.320607	0.795535	5.31342e-74	1.64261e-11	0.372051	0.669794	0.913657
A5.351	A5	1	[9611876 9612589]	[9612429 9612589]	+	AT1G27630	0.191609	0.0678534	0.242542	0.0338261	-0.00318329	-0.00058016	0.0110574	8.5122e-19	4.89263e-22	0.0331818	2.77479e-08	0.0148365	4.31545e-17	1.94466e-19	0.203027	1.06456e-06
A5.352	A5	1	[9621846 9622201]	[9621836 9622201]	+	AT1G27660	0.12789	0.0746277	-0.0225233	-0.00787257	0.00880743	0.000313697	0.24488	0.74604	0.357966	0.0176309	0.220509	0.281772	0.899025	0.622887	0.135006	0.469574
A5.1607	A5	1	[9641288 9641368]	[9641288 9641364]	-	AT1G27700	0.0671836	0.921336	0.0766549	-0.00178511	-0.000591959	9.31056e-05	3.2459e-280	0.00372072	0.597487	0.68134	0.355338	1.51757e-279	0.0221386	0.805063	0.893878	0.607671
A5.1017	A5	1	[9664053 9664239]	[9664127 9664239]	+	AT1G27750_and_AT1G27752	0.0235812	0.0139326	0.0012577	-0.00169088	0.00139522	5.44143e-05	0.0233166	0.841808	0.0359733	4.94064e-05	0.0235048	0.0302915	0.948099	0.152541	0.00137388	0.10788
A5.1609	A5	1	[9693754 9693838]	[9693754 9693841]	-	AT1G27840	0.000545719	1.00126	0.000450324	-0.00033607	5.96219e-06	9.36246e-06	0	0.782087	0.106655	0.94648	0.131422	0	0.91839	0.312711	0.995644	0.344624
A5.1608	A5	1	[9695641 9695891]	[9695641 9695720]	-	AT1G27840	3.25103e-05	0.990145	-0.00293667	0.00100399	0.000185574	-2.96361e-05	0	0.521572	0.0867749	0.457846	0.0897518	0	0.759415	0.273818	0.771701	0.271102
A5.1611	A5	1	[9719673 9719751]	[9719673 9719746]	-	AT1G27900	0.0375425	0.00862173	-0.00255448	-0.000950521	0.00250606	3.29595e-05	0.442977	0.824653	0.519325	6.76638e-05	0.453307	0.487653	0.93993	0.752129	0.00179453	0.688938
A5.1610	A5	1	[9719856 9719948]	[9719856 9719936]	-	AT1G27900	0.258877	-0.00317109	0.167668	0.00440725	0.00570053	-0.000124879	0.90752	2.13524e-09	0.218673	0.000190518	0.242098	0.926352	4.49833e-08	0.478117	0.00434201	0.495424
A5.2328	A5	1	[9729487 9729648]	[9729487 9729599]	-	AT1G27921_and_AT1G27930	0.0611959	0.718337	0.117173	0.00415489	-0.00349855	2.28184e-05	1.02262e-48	0.0196844	0.518014	0.201782	0.905159	3.05699e-48	0.0858259	0.751495	0.539861	0.967403
A5.1018	A5	1	[9749724 9749832]	[9749735 9749832]	+	AT1G27970_and_AT1G27980	0.0530556	0.224647	0.0107797	-0.00232444	0.00264224	0.000132686	3.33207e-17	0.693208	0.50612	0.0763113	0.202731	7.42814e-17	0.870263	0.743578	0.330789	0.446159
A5.1020	A5	1	[9782625 9782775]	[9782695 9782775]	+	AT1G28060_and_AT1G28070	0.00107878	0.996879	0.00126521	0.000253231	-1.16517e-05	-7.58975e-06	0	0.566982	0.370459	0.923009	0.36764	0	0.792081	0.633367	0.98882	0.618892
A5.1019	A5	1	[9782690 9782775]	[9782695 9782775]	+	AT1G28060_and_AT1G28070	0.00242311	1.00068	0.00106479	-0.000341717	8.48944e-05	4.50524e-06	0	0.654998	0.26237	0.513745	0.619937	0	0.848307	0.529356	0.808592	0.808706
A5.356	A5	1	[9802818 9802915]	[9802822 9802915]	+	AT1G28100	0.0217335	0.0667295	0.011489	0.00106008	0.00064028	-3.41325e-05	1.83937e-15	0.182037	0.335837	0.172801	0.298331	3.97187e-15	0.422285	0.603199	0.500893	0.558341
A5.358	A5	1	[9802954 9803206]	[9802978 9803206]	+	AT1G28100	0.041882	0.0556634	0.0378834	-0.000632566	0.000249912	3.9949e-05	1.62637e-07	0.000511515	0.650204	0.674365	0.336463	2.86723e-07	0.00403073	0.838384	0.889937	0.589478
A5.357	A5	1	[9803676 9803770]	[9803680 9803770]	+	AT1G28100	0.000816192	0.998262	0.00190934	-3.27817e-05	-6.83217e-05	3.03084e-06	0	0.0350933	0.77734	0.166914	0.380226	0	0.133973	0.909718	0.498514	0.630152
A5.1613	A5	1	[9878851 9879212]	[9878851 9878937]	-	AT1G28260	0.0168743	0.0339966	0.00688106	0.00264837	0.000624575	-6.7621e-05	0.00105462	0.51812	0.0518881	0.282277	0.0957258	0.00153846	0.757116	0.196617	0.633038	0.282772
A5.1614	A5	1	[9934288 9934793]	[9934288 9934450]	-	AT1G28330	0.00135306	0.00513618	0.00126035	0.000326223	5.79423e-06	-1.73016e-05	0.000499373	0.405041	0.092083	0.94406	0.0027139	0.000744985	0.673554	0.284603	0.994735	0.0211286
A5.359	A5	1	[9943910 9944044]	[9943872 9944044]	+	AT1G28350	0.0282219	0.980583	0.00498639	-0.00232346	0.00145222	5.80551e-05	7.59222e-306	0.852998	0.499777	0.322571	0.571451	3.62757e-305	0.952497	0.738419	0.67117	0.775338
A5.1615	A5	1	[9979391 9979535]	[9979391 9979516]	-	AT1G28410	0.0136951	0.049582	-0.105551	0.0330761	0.0054148	-0.00117651	0.614109	0.321144	0.00509939	0.29171	0.000601119	0.653107	0.594911	0.0363441	0.642066	0.00635537
A5.360	A5	1	[10029267 10029673]	[10029435 10029673]	+	AT1G28520	0.0129716	0.0132115	0.0131905	0.000206308	-1.36832e-05	-1.16675e-05	0.0842357	0.0928873	0.837243	0.97451	0.696611	0.103073	0.267948	0.938027	1	0.858169
A5.1617	A5	1	[10054510 10054614]	[10054510 10054580]	-	AT1G28610	0.0256725	0.0196386	0.0378771	-0.00362587	-0.00125469	0.000153124	0.111227	0.00843664	0.0391158	0.226442	0.0204825	0.13401	0.0434363	0.161546	0.570555	0.0981802
A5.1622	A5	1	[10072457 10072532]	[10072457 10072529]	-	AT1G28660	0.00306762	0.981236	-0.000915005	0.00155576	0.000248914	-7.01513e-05	0	0.893075	0.0740519	0.502695	0.00686578	0	0.969065	0.247282	0.801539	0.0438686
A5.2330	A5	1	[10087350 10087425]	[10087350 10087430]	-	AT1G28710_and_AT1G06177	0.0367332	0.826745	0.0397455	0.00596162	-0.000188268	-0.00033335	1.76919e-119	0.276118	0.201671	0.924662	0.0165698	6.65903e-119	0.546552	0.455518	0.989453	0.0842626
A5.2331	A5	1	[10109785 10109861]	[10109785 10109925]	-	AT1G28960_and_AT1G28765	0.198116	0.362385	0.148559	-0.0328885	0.00309733	0.000984705	0.000498788	0.164176	0.0160754	0.594959	0.0155669	0.000744188	0.394398	0.086328	0.853746	0.080536
A5.1623	A5	1	[10130971 10131109]	[10130971 10131069]	-	AT1G29030	0.0135615	0.851385	0.0251533	0.00590423	-0.000724487	-0.000138127	2.22701e-145	0.459669	0.174929	0.696261	0.28683	8.84692e-145	0.718272	0.42023	0.901619	0.54677
A5.1024	A5	1	[10134536 10134685]	[10134581 10134685]	+	AT1G29040_and_AT1G29041	0.116302	0.840308	0.124957	-6.33107e-05	-0.000540935	4.85452e-05	0	1.74426e-17	0.973117	0.499514	0.385816	0	8.03655e-16	0.998129	0.799304	0.635245
A5.1023	A5	1	[10134797 10135050]	[10134777 10135050]	+	AT1G29040_and_AT1G29041	0.104643	0.384564	0.116873	-0.00154798	-0.000764395	0.000139985	2.19346e-49	1.20723e-05	0.650515	0.59982	0.169127	6.58347e-49	0.000139975	0.838494	0.856071	0.399467
A5.361	A5	1	[10174233 10174301]	[10174227 10174301]	+	AT1G29120	0.106123	0.756511	0.124162	-0.0017771	-0.0011274	0.000238614	5.2289e-49	0.0185732	0.792289	0.695205	0.235341	1.56578e-48	0.082008	0.91661	0.900851	0.487526
A5.362	A5	1	[10177782 10177860]	[10177784 10177860]	+	AT1G29120	0.000418937	0.00021146	0.000134738	3.93124e-06	1.77624e-05	1.201e-06	0.88001	0.925301	0.982941	0.820763	0.826472	0.901202	0.979614	1	0.953448	0.929399
A5.1624	A5	1	[10219016 10219622]	[10219016 10219617]	-	AT1G29240	0.00332818	0.0281829	0.00354897	0.00060386	-1.05208e-05	-1.82304e-05	0.000241174	0.650549	0.550865	0.980403	0.54601	0.000366413	0.846	0.773453	1	0.757613
A5.363	A5	1	[10252387 10252647]	[10252523 10252647]	+	AT1G29310	0.00246405	0.0110682	-0.00899314	0.000425994	0.000716074	-2.26387e-05	0.115047	0.21198	0.644004	0.0684991	0.409821	0.138433	0.464881	0.834826	0.312322	0.654843
A5.2334	A5	1	[10287268 10287513]	[10287268 10287449]	-	AT1G29370_and_AT1G29390	0.0078482	0.0297857	0.0160557	-0.00221322	-0.000512971	5.15427e-05	2.97733e-10	0.000932283	0.000361836	0.0525508	0.00531041	5.70988e-10	0.00680493	0.00437402	0.267477	0.0359046
A5.1625	A5	1	[10293719 10294137]	[10293719 10294380]	-	AT1G29400	0.00744048	0.97985	0.0143736	1.35033e-05	-0.000433323	1.20974e-05	0	6.27211e-08	0.968308	0.00278914	0.232238	0	1.07703e-06	0.995483	0.036953	0.483553
A5.1025	A5	1	[10334381 10334536]	[10334447 10334536]	+	AT1G29550_and_AT1G29560	0.0793642	0.633646	0.0673044	0.0161402	0.00117603	-0.000725105	2.30055e-13	0.462496	0.15782	0.814791	0.0352412	4.75289e-13	0.720814	0.395478	0.951109	0.143949
A5.1627	A5	1	[10395581 10395697]	[10395581 10395654]	-	AT1G29720	0.034891	0.044375	0.00794852	-0.00134002	0.00192507	-8.72389e-08	0.101229	0.782554	0.714043	0.276956	0.999408	0.122639	0.918615	0.873758	0.629034	1
A5.1626	A5	1	[10398562 10398673]	[10398562 10398698]	-	AT1G29720	0.293401	0.119527	0.144916	-0.0112297	0.00957947	0.000416684	0.0732211	0.0411553	0.21271	0.0281331	0.150405	0.0902399	0.150643	0.470052	0.182274	0.372855
A5.1630	A5	1	[10416889 10417061]	[10416889 10417056]	-	AT1G29750	0.374416	0.0201097	0.0694009	-0.00288452	0.0190634	0.0001425	0.697998	0.191788	0.671535	4.95348e-11	0.482014	0.733143	0.43573	0.852175	6.00257e-09	0.709957
A5.1629	A5	1	[10418487 10418601]	[10418487 10418581]	-	AT1G29750	0.0180002	0.12116	-0.0274116	-0.0133369	0.00283824	0.000381689	3.92457e-06	0.308759	0.000108552	0.0533858	0.000200975	6.53401e-06	0.581728	0.00160793	0.26962	0.00258906
A5.1628	A5	1	[10419719 10420128]	[10419719 10420330]	-	AT1G29750	0.00729799	1.0011	0.00723859	-0.00190789	3.71275e-06	5.11194e-05	0	0.207214	0.00936809	0.990539	0.0194634	0	0.458076	0.0576513	1	0.0946189
A5.364	A5	1	[10448133 10448679]	[10447868 10448679]	+	AT1G29850	0.00027911	0.995842	0.000350588	-5.45931e-05	-4.46738e-06	4.23809e-06	0	0.734554	0.679834	0.936874	0.282272	0	0.893365	0.85598	0.993089	0.541312
A5.365	A5	1	[10449485 10449597]	[10449480 10449597]	+	AT1G29850	0.00027911	0.995842	0.000350588	-5.45931e-05	-4.46738e-06	4.23809e-06	0	0.734554	0.679834	0.936874	0.282272	0	0.893365	0.85598	0.993089	0.541312
A5.366	A5	1	[10466213 10466306]	[10466217 10466306]	+	AT1G29890	0.0793722	0.00382731	0.0347676	-0.000324466	0.00278779	8.47694e-06	0.800258	0.0250674	0.870189	0.000991732	0.886061	0.828237	0.103674	0.953373	0.0165344	0.957947
A5.367	A5	1	[10495675 10495803]	[10495631 10495803]	+	AT1G29960	0.0578386	0.0192935	0.0973073	0.000279835	-0.0024668	-2.8438e-05	0.424455	8.61357e-05	0.929669	0.0680536	0.763391	0.468856	0.000838297	0.978489	0.311338	0.895847
A5.1631	A5	1	[10511745 10512084]	[10511745 10512242]	-	AT1G30000	0.00220236	0.997465	0.00270231	-0.00106101	-3.12468e-05	2.32722e-05	0	0.631668	0.141255	0.919069	0.27882	0	0.83377	0.37054	0.987701	0.538004
A5.368	A5	1	[10638972 10639259]	[10639025 10639259]	+	AT1G30230	0.00108842	0.00805888	4.15253e-05	-7.41364e-05	6.54311e-05	-9.15594e-08	1.47206e-15	0.968032	0.575993	0.24705	0.981506	3.18263e-15	0.996892	0.790605	0.594683	1
A5.1633	A5	1	[10642673 10642747]	[10642673 10642753]	-	AT1G30240	0.0187846	0.0346407	0.0267102	-0.00258118	-0.000495349	4.75235e-05	0.0011858	0.0148142	0.0656766	0.407444	0.255384	0.00172416	0.0684667	0.229146	0.735224	0.511144
A5.370	A5	1	[10655787 10655945]	[10655648 10655945]	+	AT1G30270	0.0309352	0.886603	0.0290921	-0.000887615	0.000115195	4.96113e-05	0	0.000434779	0.401498	0.798457	0.115543	0	0.00349913	0.660813	0.945357	0.318419
A5.369	A5	1	[10656400 10656539]	[10656441 10656539]	+	AT1G30270	0.0211581	0.00910606	0.0282276	-0.000906538	-0.000441846	2.85094e-05	0.00295807	2.69674e-19	0.0241819	0.00997485	0.0173462	0.00417302	1.43298e-17	0.115394	0.0919451	0.0869352
A5.371	A5	1	[10673676 10673866]	[10673695 10673866]	+	AT1G30300	0.0917526	-0.00940236	0.046222	0.00346563	0.00284566	-0.000110321	0.675131	0.0446047	0.239209	0.0234238	0.208595	0.711607	0.160027	0.503766	0.162579	0.454481
A5.372	A5	1	[10680493 10680708]	[10680377 10680708]	+	AT1G30320	0.00594911	0.988103	0.00945283	0.000455727	-0.000218983	-1.42631e-05	0	0.0250664	0.39855	0.341428	0.375205	0	0.103674	0.658286	0.685789	0.625416
A5.373	A5	1	[10727667 10728066]	[10727672 10728066]	+	AT1G30400	0.120779	0.744673	0.118742	0.0125448	0.00012729	-0.000366788	2.5838e-42	0.0341049	0.0801851	0.96679	0.086001	7.43897e-42	0.131115	0.259789	1	0.263863
A5.374	A5	1	[10740482 10740647]	[10740486 10740647]	+	AT1G30410	0.0978302	0.0828952	0.089463	-0.010692	0.000522954	0.000682105	0.00358057	0.00218137	0.00420329	0.742651	8.8492e-10	0.00501772	0.0140659	0.0314114	0.922786	4.52478e-08
A5.377	A5	1	[10741089 10741236]	[10741080 10741236]	+	AT1G30410	0.000561025	0.990136	0.000460252	0.000309789	6.29829e-06	-1.63271e-06	0	0.929119	0.639805	0.982198	0.934029	0	0.980767	0.83242	1	0.981473
A5.375	A5	1	[10741080 10741236]	[10741153 10741236]	+	AT1G30410	0.0616727	0.0632085	0.0268156	-0.00193627	0.00217857	0.000140469	0.00226852	0.206822	0.476194	0.0601219	0.0828055	0.00323051	0.45761	0.720917	0.290041	0.257385
A5.1026	A5	1	[10754684 10754777]	[10754607 10754777]	+	AT1G30420_and_AT1G30430	0.224276	0.311491	0.326945	-0.000409644	-0.00801665	-0.000237281	3.72789e-05	1.20967e-05	0.966321	0.0558311	0.406084	5.92969e-05	0.000140204	0.994644	0.277196	0.651933
A5.378	A5	1	[10785326 10785529]	[10785385 10785529]	+	AT1G30470	0.000374652	0.0303299	0.021083	-0.000728158	-0.00129427	1.06779e-05	1.97352e-08	0.000142316	0.304461	1.86301e-05	0.613272	3.59095e-08	0.00131102	0.575563	0.000603425	0.804184
A5.1634	A5	1	[10808632 10808960]	[10808632 10809084]	-	AT1G30510	0.00716588	0.00990399	-0.00510819	-0.0017384	0.000767129	5.39738e-05	0.400816	0.672738	0.261209	0.244929	0.241696	0.444572	0.858853	0.52806	0.592396	0.494845
A5.380	A5	1	[10854873 10855429]	[10854642 10855429]	+	AT1G30620	0.0381897	0.160131	0.0365552	-0.0167227	0.000102153	0.000423322	0.00777253	0.553647	0.0341902	0.975796	0.0719731	0.0105703	0.782232	0.147178	1	0.234023
A5.381	A5	1	[10855936 10856040]	[10855939 10856040]	+	AT1G30620	0.00620772	0.99642	0.00484641	-0.00010035	8.50823e-05	-1.49606e-05	0	0.497762	0.912624	0.827284	0.58298	0	0.7437	0.971861	0.955226	0.783413
A5.383	A5	1	[10861156 10861261]	[10860852 10861261]	+	AT1G30640	0.013982	0.97385	0.015555	-0.00119394	-9.83117e-05	2.7367e-05	0	0.0380716	0.213388	0.810107	0.338448	0	0.142162	0.471018	0.949918	0.59153
A5.387	A5	1	[10887827 10888275]	[10887850 10888275]	+	AT1G30690	0.112378	0.105295	0.0951345	-0.000470573	0.00107773	-8.81746e-06	6.44488e-11	8.73468e-09	0.823969	0.232176	0.888748	1.25833e-10	1.68969e-07	0.931492	0.577459	0.958905
A5.1639	A5	1	[10941580 10941766]	[10941580 10941679]	-	AT1G30810	0.0116839	0.245837	-0.135462	-0.0182898	0.00983631	0.00075191	0.0188038	0.206949	0.18523	0.0982042	0.0678545	0.0246565	0.45775	0.434541	0.3813	0.225652
A5.1640	A5	1	[10948868 10948956]	[10948868 10949162]	-	AT1G30820	0.000863995	0.992018	0.00141396	0.000373688	-3.43726e-05	-5.95635e-06	0	0.379171	0.0692781	0.695152	0.331149	0	0.651211	0.237445	0.900821	0.583666
A5.388	A5	1	[10967971 10968627]	[10967904 10968627]	+	AT1G30835	0.00108023	0.993364	-0.00162488	0.000643554	0.00016907	-2.08804e-05	0	0.70335	0.238466	0.467657	0.199259	0	0.87665	0.502982	0.777256	0.441432
A5.392	A5	1	[10994415 10994887]	[10994430 10994887]	+	AT1G30890	0.0116613	0.00181573	0.0190699	-0.000330133	-0.000463033	1.03167e-05	0.757117	0.00154483	0.668354	0.158786	0.653202	0.788377	0.0105043	0.849549	0.488333	0.831672
A5.390	A5	1	[10994415 10994887]	[10994440 10994887]	+	AT1G30890	0.00919078	0.00692357	-0.00166127	-0.00104171	0.000678253	3.2439e-05	0.0348572	0.621656	0.0155748	0.00022138	0.0114761	0.0444855	0.827486	0.0841878	0.00495818	0.0642886
A5.2335	A5	1	[11041513 11041594]	[11041513 11041606]	-	AT1G30970_and_AT1G06397	0.0152207	0.975536	0.0166759	0.00027623	-9.09507e-05	-2.36341e-06	0	0.00035123	0.643538	0.720844	0.894286	0	0.00289551	0.834552	0.911961	0.961865
A5.2336	A5	1	[11042948 11043399]	[11042948 11043395]	-	AT1G30970_and_AT1G06397	7.50622e-05	-0.00010321	0.000135112	1.87655e-05	-3.75311e-06	-5.86423e-07	0.499137	0.388461	0.349168	0.660576	0.32615	0.541774	0.657526	0.614605	0.88342	0.578859
A5.393	A5	1	[11087190 11087272]	[11087184 11087272]	+	AT1G31070	0.26539	0.0236581	0.213955	-0.00187016	0.00321468	5.702e-05	0.255262	1.13843e-23	0.493239	0.00574343	0.48323	0.29296	8.09941e-22	0.733999	0.0624545	0.710876
A5.1641	A5	1	[11106420 11106508]	[11106420 11106503]	-	AT1G31120	0.0385366	0.000445353	0.0139998	0.00252077	0.00153355	-7.54616e-05	0.974196	0.321609	0.163046	0.0465725	0.161075	0.98721	0.595211	0.402603	0.24943	0.388484
A5.394	A5	1	[11133840 11133926]	[11133846 11133926]	+	AT1G31170	0.00236768	0.983728	0.00616295	0.000643518	-0.000237204	-2.57717e-05	0	0.0190977	0.055786	0.0982398	0.0101451	0	0.0837577	0.206348	0.381368	0.0587351
A5.1027	A5	1	[11145996 11146065]	[11146000 11146065]	+	AT1G31190_and_AT1G06423	0.0018298	1.0035	-0.0110877	-0.00144807	0.000807343	1.79843e-05	0	0.115863	0.108478	0.0358462	0.503478	0	0.311833	0.315579	0.211844	0.726672
A5.2337	A5	1	[11162776 11162850]	[11162776 11162859]	-	AT1G31230_and_AT1G31240	0.00311358	0.989387	0.00159342	-0.000159289	9.50101e-05	8.5234e-06	0	0.727016	0.785033	0.702793	0.62424	0	0.88978	0.912944	0.903988	0.811858
A5.395	A5	1	[11193980 11194237]	[11193838 11194237]	+	AT1G31300	0.00294747	0.787846	0.0182226	-0.000310807	-0.000954698	-2.22174e-05	0	0.378935	0.906626	0.398131	0.7784	0	0.650993	0.968866	0.729031	0.904181
A5.1644	A5	1	[11295912 11295990]	[11295912 11295999]	-	AT1G31550	0.230157	0.260999	0.312629	0.0175338	-0.00510477	-1.62569e-06	2.6405e-06	3.77178e-08	0.0187044	0.109885	0.994247	4.43706e-06	6.68074e-07	0.0964242	0.404104	1
A5.1649	A5	1	[11377308 11377482]	[11377308 11377480]	-	AT1G31770	0.00420049	0.0373811	-0.0351453	-0.00457149	0.00245911	0.000155619	0.118245	0.152239	0.145522	0.0663261	0.0963266	0.142012	0.37605	0.376662	0.307137	0.283829
A5.2338	A5	1	[11418165 11418328]	[11418165 11418266]	-	AT1G31820_and_AT1G31830	0.0185634	1.01657	-0.00967527	-0.00327544	0.00176492	2.41316e-05	0	0.466592	0.054054	0.0149187	0.633838	0	0.724249	0.202118	0.121146	0.818265
A5.399	A5	1	[11430452 11431135]	[11430448 11431135]	+	AT1G31850	0.187816	0.717752	0.224133	0.00550828	-0.00226983	-0.000263093	4.72521e-81	6.4811e-09	0.264918	0.281306	0.0739188	1.61572e-80	1.27694e-07	0.53187	0.632418	0.238657
A5.400	A5	1	[11431008 11431135]	[11430448 11431135]	+	AT1G31850	0.00535341	0.949251	0.00483834	-0.00123139	3.21916e-05	2.52931e-05	0	0.581124	0.272399	0.94635	0.449279	0	0.801167	0.541184	0.995543	0.686281
A5.401	A5	1	[11430452 11431135]	[11431008 11431135]	+	AT1G31850	0.280352	0.0872231	0.443372	0.0127284	-0.0101888	-0.000425813	0.23409	3.72982e-09	0.185861	0.0130102	0.137456	0.270212	7.59466e-08	0.43496	0.110778	0.353664
A5.402	A5	1	[11481228 11481332]	[11481232 11481332]	+	AT1G31970	0.00569986	0.0324706	0.00608481	-0.00224873	-2.40595e-05	0.000183189	0.00215316	0.575167	0.105468	0.967598	9.59136e-06	0.00307168	0.79743	0.310273	1	0.00018885
A5.1650	A5	1	[11535353 11535443]	[11535353 11535457]	-	AT1G32070	0.0997998	0.667469	0.148417	0.00130933	-0.00303857	0.000101865	3.13446e-103	2.92373e-06	0.747126	0.079285	0.399844	1.14158e-102	3.80596e-05	0.893231	0.338901	0.647122
A5.1651	A5	1	[11559244 11559464]	[11559244 11559491]	-	AT1G32130	9.51264e-05	-0.000331212	0.000533348	7.80503e-05	-2.73889e-05	-2.13687e-06	0.554245	0.353249	0.288326	0.382214	0.32924	0.595088	0.626678	0.558553	0.718444	0.581638
A5.1653	A5	1	[11594408 11594632]	[11594408 11594627]	-	AT1G32190	0.0311776	0.95674	0.0430779	-0.00112697	-0.000743772	6.32083e-05	0	0.00017876	0.443534	0.235637	0.149204	0	0.00160411	0.696935	0.58158	0.371142
A5.1654	A5	1	[11603143 11603215]	[11603143 11603240]	-	AT1G32200	0.0106219	0.971229	0.00539781	0.000875683	0.000326508	-3.30631e-05	0	0.271645	0.163352	0.222896	0.0773413	0	0.541834	0.40304	0.565684	0.245946
A5.405	A5	1	[11612860 11613312]	[11613091 11613312]	+	AT1G32230	0.0040879	0.00412901	0.00988446	-0.000159171	-0.000362285	2.9894e-06	0.0312208	4.98533e-07	0.52693	0.0007321	0.690034	0.0400557	7.48678e-06	0.757184	0.013037	0.854524
A5.403	A5	1	[11612860 11613312]	[11613177 11613312]	+	AT1G32230	0.0011915	0.0208149	0.00499829	-0.00151848	-0.000237924	3.04994e-05	9.50201e-30	0.00801121	3.04921e-10	0.0206879	2.19223e-05	2.47168e-29	0.041598	1.94224e-08	0.150541	0.000385775
A5.406	A5	1	[11614906 11615231]	[11615161 11615231]	+	AT1G32230	0.0262131	-0.0187531	0.0019324	0.00440284	0.00151754	-8.11164e-05	0.0509046	0.844537	0.00047925	0.00476106	0.0308287	0.0638692	0.949237	0.00550113	0.0546926	0.1317
A5.1655	A5	1	[11658526 11659469]	[11658526 11659946]	-	AT1G32330	0.00281129	0.943784	0.00366705	0.00321267	-5.3485e-05	-7.88918e-05	0	0.784018	0.0605421	0.941585	0.12191	0	0.919289	0.217808	0.99402	0.329433
A5.1031	A5	1	[11677925 11678057]	[11677923 11678057]	+	AT1G32370_and_AT1G32375	0.235259	0.674807	0.0487231	-0.000643221	0.0112904	-0.000575356	2.00311e-31	0.407351	0.930315	0.000328745	0.00774389	5.29744e-31	0.675622	0.978733	0.00685787	0.0480527
A5.407	A5	1	[11693925 11694367]	[11693921 11694367]	+	AT1G32410	0.117145	0.157075	0.184828	0.00114932	-0.00423015	-5.25126e-05	9.67062e-08	9.55752e-10	0.766248	0.0102855	0.648482	1.71739e-07	2.11514e-08	0.903201	0.0937936	0.829124
A5.408	A5	1	[11693925 11694374]	[11693921 11694374]	+	AT1G32410	0.0458685	0.129509	0.0296125	-6.01127e-06	0.001016	-5.60603e-05	1.36086e-15	0.0749823	0.997746	0.262791	0.376562	2.94412e-15	0.232327	1	0.612446	0.626727
A5.409	A5	1	[11767705 11767874]	[11767692 11767874]	+	AT1G32540	0.193266	0.0347796	0.220647	-0.00351447	-0.00171127	0.000200542	0.547253	0.000197628	0.643097	0.596708	0.374861	0.588408	0.00174505	0.834346	0.854271	0.62539
A5.1656	A5	1	[11773530 11773883]	[11773530 11773892]	-	AT1G32550	0.00165609	0.000637988	0.00327451	-7.60934e-05	-0.000101151	2.84898e-06	0.473343	0.000334	0.514672	0.0422245	0.412922	0.517678	0.00277728	0.749405	0.234922	0.656772
A5.411	A5	1	[11913145 11913282]	[11913163 11913282]	+	AT1G32870	0.000673107	1.00079	0.000134621	-0.000201932	3.36553e-05	5.25865e-06	0	0.923661	0.261249	0.660576	0.32615	0	0.978957	0.52806	0.88342	0.578859
A5.1658	A5	1	[11923524 11923617]	[11923524 11923594]	-	AT1G32900	0.0662653	0.0115477	0.0804258	-0.000858851	-0.00088503	3.54158e-05	0.504973	6.0108e-06	0.705602	0.361268	0.6011	0.547291	7.39505e-05	0.869166	0.702367	0.795613
A5.2341	A5	1	[11968004 11968122]	[11968004 11968126]	-	AT1G33050_and_AT1G33055	0.00185174	0.934855	-0.0036337	0.0031333	0.00034284	-0.000199517	0	0.530013	2.31162e-05	0.277444	1.49491e-19	0	0.766046	0.000423537	0.629489	3.20598e-17
A5.2339	A5	1	[11971046 11971409]	[11971046 11971399]	-	AT1G33050_and_AT1G33055	0.00793227	0.0023903	-0.00783362	0.000150851	0.000985368	-4.51302e-06	0.706878	0.229631	0.856514	0.00560774	0.855936	0.741268	0.489475	0.947262	0.0615036	0.944073
A5.2342	A5	1	[11971046 11971409]	[11971046 11971521]	-	AT1G33050_and_AT1G33055	0.1108	0.0699283	0.111994	0.00196728	-7.46716e-05	-5.5535e-05	0.0587989	0.00317717	0.685454	0.971239	0.701172	0.0732132	0.0193644	0.858966	1	0.860906
A5.412	A5	1	[12067054 12067483]	[12066896 12067483]	+	AT1G33265	0.0078295	0.952433	0.000921291	-0.00571771	0.00042784	0.000152168	3.16217e-132	0.981815	0.25762	0.838455	0.316588	1.22708e-131	1	0.524817	0.958728	0.572039
A5.1659	A5	1	[12068654 12068828]	[12068654 12068743]	-	AT1G33270	0.0243924	0.0195302	0.0351045	0.000893214	-0.000669507	-2.18254e-05	0.0259187	9.516e-05	0.43767	0.172465	0.524458	0.033504	0.000917438	0.691699	0.5004	0.741691
A5.1661	A5	1	[12068654 12068762]	[12068654 12068828]	-	AT1G33270	0.00392569	0.990177	-0.000638151	-0.000625447	0.00028524	2.56056e-05	0	0.916796	0.423543	0.392025	0.271503	0	0.977524	0.679883	0.725061	0.530095
A5.413	A5	1	[12075188 12075506]	[12075416 12075506]	+	AT1G33290	0.000136635	0.999916	0.000331823	-3.33396e-05	-1.21992e-05	1.06914e-06	0	0.353684	0.466398	0.531957	0.433096	0	0.626944	0.713687	0.819633	0.674172
A5.2343	A5	1	[12105911 12106322]	[12105911 12106201]	-	AT1G33390_and_AT1G33400	0.0194263	0.902425	0.042736	0.00330458	-0.00145686	-3.68901e-05	4.99274e-205	0.158417	0.393976	0.378138	0.749443	2.15763e-204	0.384937	0.654431	0.715473	0.888907
A5.2344	A5	1	[12106703 12106936]	[12106703 12106952]	-	AT1G33390_and_AT1G33400	0.149519	0.563259	0.277828	-0.0181433	-0.00801927	0.000553175	2.16392e-10	0.00226788	0.119194	0.106277	0.110839	4.16708e-10	0.0145388	0.333877	0.397358	0.310579
A5.1662	A5	1	[12111709 12111823]	[12111709 12111797]	-	AT1G33410	0.443274	0.0974265	0.253505	-0.00374625	0.0118605	0.000134131	0.00495303	1.02376e-12	0.410377	9.81632e-10	0.322546	0.00684928	3.07954e-11	0.668379	9.26026e-08	0.57825
A5.1663	A5	1	[12112613 12112727]	[12112613 12112704]	-	AT1G33410	0.181286	0.0306123	0.152178	0.000615433	0.00181922	-2.45592e-05	0.257623	4.12547e-08	0.862344	0.229355	0.816365	0.295432	7.27695e-07	0.949922	0.574446	0.924087
A5.414	A5	1	[12120585 12120691]	[12120563 12120691]	+	AT1G33415	0.0975036	0.058897	0.138714	0.00159039	-0.00257565	0.000190332	0.0315648	7.99198e-07	0.658279	0.0929852	0.0756522	0.0404778	1.16442e-05	0.843445	0.370375	0.242481
A5.2347	A5	1	[12197856 12197997]	[12197856 12197980]	-	AT1G33660_and_AT1G33615_and_AT1G06683_and_AT1G33640	0.105163	0.416018	0.16309	0.00817032	-0.00375817	-0.000330597	1.25925e-05	0.0765768	0.479811	0.440032	0.32277	2.04959e-05	0.235572	0.723867	0.75937	0.57838
A5.416	A5	1	[12206474 12207163]	[12206431 12207163]	+	AT1G33680	0.162045	0.794413	0.0880861	-0.00547817	0.00462242	1.18636e-05	1.95942e-118	0.0123938	0.224145	0.016152	0.929598	7.36017e-118	0.059351	0.485206	0.127725	0.979363
A5.1670	A5	1	[12350970 12351080]	[12350970 12351141]	-	AT1G33970	0.206116	0.821518	0.0392197	-0.00296581	0.0105832	-0.000418565	1.7649e-34	0.567861	0.738786	0.00453413	0.114978	4.79333e-34	0.792581	0.88821	0.0527154	0.317552
A5.1669	A5	1	[12350970 12351080]	[12350970 12351206]	-	AT1G33970	0.0148458	0.987084	0.00321559	0.000619674	0.000726888	-6.37537e-05	0	0.510244	0.3213	0.00636453	0.000615734	0	0.751797	0.591489	0.0670886	0.00647502
A5.1671	A5	1	[12350970 12351206]	[12350970 12351141]	-	AT1G33970	0.0052319	0.0565217	-0.0183902	-0.00211625	0.00147638	5.13141e-05	1.63968e-08	0.0733372	0.10726	0.00840921	0.189949	2.99119e-08	0.228605	0.313718	0.0821628	0.429131
A5.418	A5	1	[12351858 12352105]	[12351864 12352105]	+	AT1G33980	0.000327228	0.00370548	-0.0009896	-0.000204231	8.23017e-05	2.34219e-06	0.0144148	0.52416	0.304216	0.331546	0.692505	0.0191243	0.761329	0.575352	0.678255	0.856075
A5.417	A5	1	[12354276 12354362]	[12354291 12354362]	+	AT1G33980	0.116405	0.00590524	0.0862824	0.000827553	0.00188265	-2.72727e-05	0.594395	3.35768e-14	0.569683	0.00241985	0.529471	0.634063	1.20448e-12	0.786451	0.0332117	0.745396
A5.1672	A5	1	[12360900 12361090]	[12360900 12361112]	-	AT1G34010	0.0292066	0.378233	-0.00964939	-0.01343	0.0024285	0.000341376	1.00984e-38	0.746207	0.000430357	0.135422	0.00266832	2.83138e-38	0.899025	0.00503956	0.452875	0.0208449
A5.2353	A5	1	[12400083 12400184]	[12400083 12400180]	-	AT1G34060_and_AT1G34065	0.523895	0.0590803	0.406675	0.0104695	0.0041666	-0.000105215	0.160434	9.20314e-13	0.0722598	0.125854	0.548497	0.189438	2.79659e-11	0.243764	0.435885	0.759018
A5.2351	A5	1	[12400883 12400985]	[12400883 12400964]	-	AT1G34060_and_AT1G34065	0.119578	0.850422	0.0367259	-0.0146885	0.00434161	0.000463881	1.8643e-18	0.747353	0.265865	0.454106	0.241661	4.24915e-18	0.899523	0.533018	0.769102	0.494809
A5.420	A5	1	[12427245 12427375]	[12427257 12427375]	+	AT1G34120	0.00111287	0.00187104	-0.000462283	0.000761273	9.84473e-05	-3.17966e-05	0.755609	0.940246	0.334627	0.769815	0.176212	0.786889	0.985454	0.601812	0.934259	0.40991
A5.419	A5	1	[12428988 12429106]	[12428969 12429106]	+	AT1G34120	0.0140487	0.031443	0.000710964	-0.00428878	0.000833606	0.000162333	0.0062273	0.951922	0.00447241	0.195033	0.000304704	0.00853891	0.990119	0.0328572	0.530757	0.00365375
A5.1037	A5	1	[12436696 12436785]	[12436703 12436785]	+	AT1G34150_and_AT1G34160	0.0101447	0.990696	0.011058	-0.000387489	-5.70807e-05	6.78663e-06	0	0.0466232	0.585785	0.850668	0.748716	0	0.164946	0.797545	0.961967	0.88841
A5.1038	A5	1	[12437950 12438333]	[12437940 12438333]	+	AT1G34150_and_AT1G34160	0.113189	0.929521	0.0824707	-0.00907937	0.00191987	0.000197429	0	0.000139902	0.00104906	0.104144	0.0167766	0	0.00129037	0.0105714	0.39288	0.0849661
A5.1040	A5	1	[12448948 12449208]	[12448912 12449208]	+	AT1G34180_and_AT1G34190	0.00848965	0.970994	0.0205724	0.000753353	-0.00075517	-1.03382e-05	0	0.101529	0.639295	0.270543	0.829096	0	0.285769	0.83231	0.621643	0.930653
A5.421	A5	1	[12456078 12456344]	[12456260 12456344]	+	AT1G34200	0.00631107	0.976841	-0.0169728	-0.00277266	0.00145524	4.15814e-05	0	0.384629	0.266969	0.171821	0.576348	0	0.656125	0.534332	0.499851	0.778828
A5.422	A5	1	[12459870 12460121]	[12459845 12460121]	+	AT1G34210	0.0209981	0.024807	0.001713	-0.00290258	0.00120532	0.000108763	0.00870353	0.859833	0.0193516	0.0227525	0.00327013	0.0117852	0.954943	0.0988472	0.159836	0.0245116
A5.424	A5	1	[12485366 12485909]	[12485494 12485909]	+	AT1G34260	0.0403476	0.75626	0.0335133	0.0132397	0.000441538	-0.000202418	2.3156e-111	0.335253	0.00298083	0.821309	0.131918	8.58236e-111	0.608691	0.0240353	0.953501	0.344924
A5.425	A5	1	[12485494 12485909]	[12485491 12485909]	+	AT1G34260	0.00931816	0.000845964	0.0151221	0.000508575	-0.000374977	5.80752e-06	0.947599	0.254602	0.76502	0.615257	0.909827	0.963076	0.522023	0.902493	0.864398	0.970027
A5.423	A5	1	[12489304 12489515]	[12489278 12489515]	+	AT1G34260	0.111831	0.0507685	0.208188	-0.00770172	-0.00602228	0.000244912	0.113806	2.60125e-10	0.0676003	0.000803493	0.0511062	0.137012	6.10096e-09	0.233778	0.0139886	0.18693
A5.1677	A5	1	[12514658 12515264]	[12514658 12514862]	-	AT1G34315	0.0200332	0.167764	0.0225782	-0.00900764	-0.000159061	0.00013533	1.4356e-21	0.210774	9.52844e-05	0.871617	0.0491075	3.41623e-21	0.463155	0.00143892	0.970018	0.18167
A5.1675	A5	1	[12514658 12515264]	[12514658 12515255]	-	AT1G34315	0.122385	0.0793435	0.0895678	-0.00275547	0.00205108	9.31115e-05	0.00104879	0.00031095	0.385899	0.130114	0.325431	0.00153047	0.00260524	0.647992	0.44276	0.578859
A5.427	A5	1	[12528299 12528398]	[12528295 12528398]	+	AT1G34330	0.0120483	0.964245	0.0168787	0.00192353	-0.000301897	-4.01848e-05	0	0.0853204	0.12537	0.57267	0.282559	0	0.253233	0.343501	0.841662	0.541469
A5.428	A5	1	[12531673 12531747]	[12531648 12531747]	+	AT1G34340	0.0863681	0.0710449	-0.0320333	-0.0131908	0.00740009	0.000482733	0.00126369	0.15648	5.09823e-06	1.96871e-09	2.12371e-08	0.00183366	0.382255	0.000116103	1.74664e-07	8.36297e-07
A5.429	A5	1	[12532648 12532779]	[12532661 12532779]	+	AT1G34340	0.0263315	0.937702	0.0313024	0.000649368	-0.000310683	7.40809e-06	0	0.000925277	0.591218	0.546764	0.837077	0	0.00676208	0.800936	0.828526	0.93499
A5.431	A5	1	[12532648 12532779]	[12532696 12532779]	+	AT1G34340	0.0103002	0.936012	0.00196417	-0.0112733	-0.00315919	7.54521e-05	1.09808e-55	0.974734	0.194627	0.500381	0.775117	3.4112e-55	0.999822	0.446742	0.800128	0.902213
A5.430	A5	1	[12532696 12532779]	[12532661 12532779]	+	AT1G34340	0.103279	0.584039	0.186311	0.0214299	-0.00518951	-0.000334416	1.15801e-225	2.01756e-23	3.09712e-19	3.55197e-07	2.66073e-06	5.12474e-225	1.40851e-21	8.70991e-17	1.88742e-05	6.1966e-05
A5.432	A5	1	[12535081 12535395]	[12535006 12535395]	+	AT1G34350	0.000655436	0.983628	0.00244433	0.00082701	-0.000111806	-1.55923e-05	0	0.589876	0.154038	0.651316	0.367079	0	0.807727	0.389704	0.882797	0.618237
A5.434	A5	1	[12550588 12550956]	[12550584 12550956]	+	AT1G34370	0.0069836	0.988334	0.00827602	0.000555446	-8.07763e-05	-2.06656e-05	0	0.00543261	0.144724	0.618906	0.0685896	0	0.0303327	0.375785	0.866253	0.227235
A5.1678	A5	1	[12553605 12553726]	[12553605 12553730]	-	AT1G34380	0.123537	0.820199	0.115222	0.00338571	0.000519677	-0.000119897	1.99669e-108	0.0024529	0.486625	0.802258	0.408331	7.35467e-108	0.015551	0.728841	0.947103	0.653689
A5.1044	A5	1	[12605070 12605241]	[12605093 12605241]	+	AT1G34460_and_AT1G34470	0.258342	0.1748	0.186319	0.00576659	0.0045015	-0.000106678	3.0585e-06	1.24215e-06	0.24081	0.0317649	0.466454	5.12068e-06	1.73924e-05	0.505638	0.19674	0.697787
A5.1046	A5	1	[12606138 12606218]	[12606130 12606218]	+	AT1G34460_and_AT1G34470	0.0179851	0.950334	0.00658922	0.00296021	0.000712244	-8.12018e-05	0	0.687057	0.157196	0.424755	0.192812	0	0.867667	0.394412	0.747591	0.433072
A5.1679	A5	1	[12656034 12656235]	[12656034 12656212]	-	AT1G34570	0.195149	0.0443631	0.0297047	-0.00586887	0.0103402	0.000287631	0.292552	0.492102	0.288757	1.1683e-05	0.0809931	0.332608	0.740262	0.558914	0.000400773	0.253774
A5.1681	A5	1	[12656034 12656212]	[12656034 12656428]	-	AT1G34570	0.0128118	1.00471	-0.00992083	-0.00091381	0.00153235	-2.84715e-05	0	0.506055	0.638768	0.0719913	0.62313	0	0.748619	0.832022	0.321411	0.811121
A5.1680	A5	1	[12656034 12656235]	[12656034 12656428]	-	AT1G34570	0.0789244	0.924533	-0.0152581	0.00568812	0.00599215	-0.000321104	2.54248e-84	0.746834	0.351894	0.0229509	0.0753907	8.77824e-84	0.899266	0.617376	0.160603	0.241919
A5.435	A5	1	[12686743 12686827]	[12686750 12686827]	+	AT1G34630	0.074574	0.00964351	0.0299953	-0.000809828	0.00278617	4.28314e-05	0.130889	4.65009e-06	0.333805	6.28415e-15	0.0862409	0.156354	5.82923e-05	0.600925	1.27436e-12	0.264319
A5.1682	A5	1	[12737772 12737869]	[12737772 12737929]	-	AT1G34750	0.00177708	0.00132824	0.00206379	0.000168965	-1.79195e-05	-7.5932e-06	0.774371	0.664168	0.781145	0.944909	0.675191	0.804321	0.854005	0.911316	0.994895	0.846011
A5.1683	A5	1	[12749566 12749649]	[12749566 12749736]	-	AT1G34780	0.000857007	0.00779281	0.00976533	-0.000652797	-0.00055677	2.79281e-05	0.110526	0.0512606	0.308446	0.0416292	0.143632	0.133224	0.176595	0.579808	0.233001	0.362796
A5.436	A5	1	[12908987 12909273]	[12908975 12909273]	+	AT1G35220	0.00203806	0.00325729	0.00068386	-0.000627467	8.46373e-05	2.11881e-05	0.362952	0.852304	0.181814	0.672753	0.130234	0.405669	0.952115	0.429739	0.889261	0.342595
A5.437	A5	1	[12909585 12910041]	[12909632 12910041]	+	AT1G35220	0.0125923	0.990301	-0.0188966	0.000889474	0.00196806	-0.0001477	0	0.127115	0.574612	0.00358604	0.00175999	0	0.332686	0.789363	0.0445787	0.0149858
A5.1686	A5	1	[12933359 12933443]	[12933359 12933445]	-	AT1G35250	0.00657732	0.258174	-0.00551157	-0.000950423	0.000755556	-1.04483e-05	1.38084e-08	0.905982	0.87352	0.766631	0.953164	2.52301e-08	0.973186	0.955049	0.933129	0.990049
A5.438	A5	1	[12978355 12978439]	[12978340 12978439]	+	AT1G35340	0.000289457	0.000487133	-0.000122304	8.71388e-05	2.57351e-05	-1.93131e-06	0.767426	0.942301	0.686908	0.780119	0.76432	0.797774	0.986308	0.859789	0.937802	0.896317
A5.1690	A5	1	[13052135 13052513]	[13052135 13052507]	-	AT1G35470	0.0296095	0.941462	-0.00626146	-0.00651856	0.00224194	0.000233731	2.37039e-71	0.907818	0.346093	0.447275	0.256861	7.84254e-71	0.974152	0.613088	0.763861	0.513034
A5.1691	A5	1	[13053037 13053160]	[13053037 13053126]	-	AT1G35470	0.0179111	0.0245397	0.0211307	-0.00166819	-0.000201226	3.82552e-05	0.000289776	0.00234996	0.0605074	0.595412	0.148546	0.000438222	0.0149877	0.21771	0.853746	0.370247
A5.439	A5	1	[13072097 13072193]	[13072101 13072193]	+	AT1G35510	0.046147	0.97483	0.0366893	-0.00361973	0.000591103	8.47692e-05	0	6.67739e-06	0.000514802	0.183505	0.00634046	0	8.14456e-05	0.00582842	0.515675	0.0413225
A5.1048	A5	1	[13078915 13079304]	[13078267 13079304]	+	AT1G35513_and_AT1G35515_and_AT1G35516	0.0325315	0.424218	0.0302283	0.0167489	0.000143948	-0.000108298	3.33453e-41	0.350408	5.25452e-05	0.935036	0.380164	9.51948e-41	0.624018	0.000857347	0.992477	0.630119
A5.1049	A5	1	[13078915 13079304]	[13078929 13079304]	+	AT1G35513_and_AT1G35515_and_AT1G35516	0.167724	0.578821	0.159091	0.00105478	0.000539558	1.48637e-05	8.56332e-155	1.23859e-12	0.712889	0.658887	0.861838	3.45617e-154	3.68119e-11	0.873018	0.88342	0.947393
A5.440	A5	1	[13453265 13453360]	[13453041 13453360]	+	AT1G36050	0.0039994	0.146894	0.0247257	0.00161294	-0.00129539	-1.87375e-05	1.39434e-05	0.475932	0.716258	0.493606	0.887309	2.26562e-05	0.731618	0.87505	0.795459	0.95821
A5.2354	A5	1	[13468699 13469913]	[13468699 13469097]	-	AT1G36070_and_AT1G06953	0.0160794	0.0756874	0.018507	0.0246981	-0.000151721	-0.000822562	0.000425761	0.401004	1.9513e-18	0.899571	1.22188e-22	0.000637946	0.669612	4.69098e-16	0.980304	3.53632e-20
A5.441	A5	1	[13533559 13534166]	[13533898 13534166]	+	AT1G36160	0.00672006	0.0153144	0.00601539	-0.00147935	4.40416e-05	5.74376e-05	0.0145643	0.349593	0.0721821	0.900102	0.0191342	0.0193107	0.623249	0.243696	0.980365	0.0934021
A5.442	A5	1	[13534537 13534688]	[13534600 13534688]	+	AT1G36160	0.00976185	0.00453568	0.0068195	-0.000462473	0.000183897	1.61761e-05	0.0101132	0.000163675	0.0457204	0.062435	0.0190055	0.0136148	0.00148392	0.180138	0.296461	0.0929385
A5.1695	A5	1	[15607334 15607619]	[15607334 15607658]	-	AT1G41830	0.000201807	1.00012	-0.000125916	-1.89726e-05	2.04827e-05	-4.71902e-08	0	0.658259	0.602425	0.187205	0.965315	0	0.849843	0.808567	0.52094	0.995607
A5.1696	A5	1	[15651303 15651583]	[15651303 15651412]	-	AT1G41880	2.53734e-06	0.000856534	-0.000307987	-2.66085e-05	1.94078e-05	2.84719e-07	0.000139608	0.181879	0.367335	0.123068	0.746134	0.000215042	0.422162	0.630847	0.430138	0.886711
A5.1698	A5	1	[15651303 15651583]	[15651303 15651584]	-	AT1G41880	1.54667e-05	2.12667e-05	5.25866e-05	-3.86667e-06	-2.32e-06	1.20833e-07	0.483003	0.0908779	0.331194	0.171525	0.308136	0.526523	0.263811	0.598429	0.499234	0.563876
A5.1051	A5	1	[15973353 15973486]	[15973300 15973486]	+	AT1G42540_and_AT1G42550	0.155716	0.840697	0.0169573	-0.0079186	0.00867242	5.41681e-05	6.53374e-72	0.7244	0.198131	0.000948621	0.76765	2.16556e-71	0.888442	0.451288	0.0159585	0.898102
A5.1050	A5	1	[15975184 15975261]	[15975182 15975261]	+	AT1G42540_and_AT1G42550	0.513136	0.128319	0.474649	0.00278215	0.00240539	6.13706e-05	0.00934467	7.14591e-21	0.667671	0.384	0.750592	0.0126139	4.26039e-19	0.849041	0.719622	0.889491
A5.444	A5	1	[16156803 16156933]	[16156751 16156933]	+	AT1G43020	0.0847334	0.925462	0.0710388	-0.00459756	0.000855915	0.000141396	0	0.000711384	0.0868278	0.454687	0.0771471	0	0.00538233	0.273956	0.769294	0.245492
A5.445	A5	1	[16266794 16266975]	[16266790 16266975]	+	AT1G43170	0.00132437	0.951692	0.0255484	0.00295436	-0.001514	-9.85127e-05	2.22292e-196	0.434036	0.479522	0.395446	0.428772	9.5195e-196	0.697387	0.723739	0.727266	0.670434
A5.1701	A5	1	[16278193 16278502]	[16278193 16278454]	-	AT1G43190	0.000170024	0.00199619	-0.000713111	0.000120331	5.51959e-05	-6.71213e-06	0.194987	0.651788	0.551717	0.521995	0.26517	0.227577	0.846814	0.773889	0.81397	0.522316
A5.1706	A5	1	[16427099 16427342]	[16427099 16427300]	-	AT1G43620	0.0784128	0.0522721	0.14171	-0.00566885	-0.0039561	0.000146851	0.0010755	5.56236e-18	0.00689616	9.78344e-06	0.0188236	0.0015676	2.65728e-16	0.0458088	0.00034596	0.092428
A5.446	A5	1	[16480721 16480821]	[16480739 16480821]	+	AT1G43690	0.00626116	0.0232677	-0.00420968	-0.000581579	0.000654428	5.81056e-05	0.0275927	0.697633	0.674832	0.268244	0.159504	0.0355662	0.872884	0.853779	0.618714	0.386186
A5.447	A5	1	[16537562 16537662]	[16537594 16537662]	+	AT1G43765	0.0424965	0.967094	0.0481685	-0.0028172	-0.000282213	6.83328e-05	5.97757e-68	0.429922	0.699328	0.928049	0.751418	1.95278e-67	0.693993	0.865594	0.990653	0.890045
A5.448	A5	1	[16617492 16617611]	[16617231 16617611]	+	AT1G43850	0.0203745	0.839432	0.0193668	-0.00662492	6.29808e-05	0.000230617	0	0.226606	0.00122545	0.94254	0.000158726	0	0.485352	0.0120336	0.994234	0.00212262
A5.453	A5	1	[16893831 16894071]	[16893999 16894071]	+	AT1G44750	0.00331888	0.00811852	0.00236854	-0.00077266	5.93958e-05	2.83799e-05	0.0107849	0.468418	0.0645011	0.738919	0.0226697	0.0144864	0.725888	0.226342	0.920985	0.10518
A5.450	A5	1	[16895704 16895872]	[16895327 16895872]	+	AT1G44750	0.0021307	0.991669	0.00118662	0.00139716	5.90055e-05	-0.000105414	0	0.862499	0.110961	0.874564	5.43652e-05	0	0.955931	0.319603	0.971267	0.000855212
A5.451	A5	1	[16895732 16895872]	[16895327 16895872]	+	AT1G44750	0.000735016	0.99972	0.00109342	-0.000125478	-2.24005e-05	4.62119e-06	0	0.432327	0.481248	0.768094	0.384004	0	0.695878	0.72472	0.933657	0.633525
A5.454	A5	1	[16909925 16910089]	[16909880 16910089]	+	AT1G44780	0.023793	0.914821	0.0388752	0.00594927	-0.000942643	-0.000126116	0	0.00199069	0.00021732	0.1694	0.00851398	0	0.0130165	0.00286524	0.499234	0.0516058
A5.1712	A5	1	[16912841 16912924]	[16912841 16912926]	-	AT1G44790	0.0352808	0.020308	0.0418792	-0.00156395	-0.000412397	7.79792e-05	0.0221705	4.26404e-06	0.179559	0.406554	0.02471	0.0288616	5.3952e-05	0.426472	0.734178	0.111895
A5.455	A5	1	[16942029 16942105]	[16942032 16942105]	+	AT1G44835	0.000524458	0.00332274	0.00375645	-0.000452154	-0.000202	1.82361e-05	0.376938	0.330224	0.359656	0.337189	0.215	0.420026	0.603443	0.623774	0.682621	0.462035
A5.1055	A5	1	[17053812 17053955]	[17053758 17053955]	+	AT1G45110_and_AT1G45120	0.0736635	0.833161	0.163077	0.00293694	-0.00560749	5.69885e-05	2.01411e-84	0.000188611	0.602811	0.0188547	0.734956	6.96122e-84	0.00167535	0.808722	0.141115	0.87993
A5.1713	A5	1	[17082039 17082317]	[17082039 17082286]	-	AT1G45150	0.00275537	0.00941655	0.00873562	0.000272694	-0.000373766	-1.12222e-05	0.329807	0.378202	0.829763	0.489487	0.766495	0.371703	0.650185	0.93439	0.792332	0.897385
A5.456	A5	1	[17098692 17099257]	[17098856 17099257]	+	AT1G45180	0.00116905	0.0043892	0.0042336	-0.000122334	-0.000191534	-8.67955e-08	0.220527	0.249377	0.794746	0.339461	0.995057	0.255575	0.515449	0.917594	0.684294	1
A5.1714	A5	1	[17132941 17133021]	[17132941 17133347]	-	AT1G45207	6.39614e-05	0.993956	0.00475813	-0.00173581	-0.000293385	6.51896e-05	0	0.718289	0.303657	0.683471	0.194797	0	0.885475	0.574768	0.894864	0.435657
A5.2357	A5	1	[17158883 17159181]	[17158883 17159332]	-	AT1G45229_and_AT1G45248_and_AT1G07313	0.0257737	0.686035	0.0758472	0.00354496	-0.00312959	-6.61052e-05	7.15555e-90	0.0302884	0.428729	0.101326	0.620404	2.5163e-89	0.119795	0.684345	0.387345	0.808986
A5.2355	A5	1	[17162372 17162718]	[17162372 17162722]	-	AT1G45229_and_AT1G45248_and_AT1G07313	0.0100699	-0.00712742	0.00365718	0.00160272	0.000400797	-5.3157e-05	0.323126	0.621175	0.0905048	0.320833	0.0595306	0.364822	0.827245	0.281359	0.669843	0.207484
A5.2356	A5	1	[17163276 17163534]	[17163276 17163345]	-	AT1G45229_and_AT1G45248_and_AT1G07313	0.142113	-0.0177276	0.415519	0.0673916	-0.0143823	-0.00174979	0.925538	0.0158868	0.00125025	0.102077	0.00232376	0.943128	0.0725025	0.0122156	0.388587	0.0186063
A5.2360	A5	1	[17163876 17164122]	[17163876 17164196]	-	AT1G45229_and_AT1G45248_and_AT1G07313	0.0362093	0.894487	0.0897103	0.00317155	-0.00334381	-3.64546e-05	0	2.49796e-07	0.154089	0.000425055	0.582449	0	3.9295e-06	0.3898	0.00842479	0.783267
A5.2358	A5	1	[17164250 17164615]	[17164250 17164670]	-	AT1G45229_and_AT1G45248_and_AT1G07313	0.00634562	0.944197	0.0312563	-0.00298808	-0.00155692	0.000157275	0	0.126471	0.253511	0.162925	0.0436856	0	0.331573	0.520036	0.493827	0.167559
A5.1719	A5	1	[17165782 17166341]	[17165782 17165890]	-	AT1G45249	0.00354929	0.00419048	0.0139815	0.000399522	-0.000652012	-1.903e-05	0.725032	0.252641	0.798339	0.328138	0.68295	0.758517	0.519718	0.919185	0.675538	0.850406
A5.1715	A5	1	[17165782 17165934]	[17165782 17166341]	-	AT1G45249	0.00136947	1.00397	-0.0104577	-0.000592065	0.000739196	8.32076e-07	0	0.10069	0.467601	0.0334311	0.972668	0	0.284099	0.71457	0.203467	0.998528
A5.1721	A5	1	[17175897 17175982]	[17175897 17175992]	-	AT1G45332	0.0359654	0.895959	0.0653762	0.00528549	-0.00183818	-0.000121388	0	0.000371287	0.0244872	0.0665597	0.0829493	0	0.00304403	0.116384	0.307923	0.257682
A5.459	A5	1	[17331277 17331364]	[17330916 17331364]	+	AT1G47278	0.00125369	0.99971	-0.00133693	-5.16111e-05	0.000161914	-4.04999e-06	0	0.552423	0.857726	0.187186	0.636833	0	0.781572	0.947871	0.52094	0.82068
A5.460	A5	1	[17451993 17452388]	[17452287 17452388]	+	AT1G47530	0.000592168	0.012108	-0.00301519	-0.000740755	0.00022546	1.38529e-05	1.6544e-14	0.0624614	0.000347091	0.0106642	0.0247486	3.50441e-14	0.203583	0.00422662	0.096129	0.112036
A5.1056	A5	1	[17462227 17462308]	[17462224 17462308]	+	AT1G47550_and_AT1G47560_and_MSTRG.4431_and_AT1G47565	0.209422	0.665087	0.241588	0.00550344	-0.00201033	-8.18021e-05	0	3.20385e-50	0.00797044	0.0230247	0.185627	0	6.72584e-48	0.0509606	0.160922	0.423376
A5.462	A5	1	[17479011 17479130]	[17478991 17479130]	+	AT1G47570	0.119255	0.720507	0.0165214	0.00129475	0.00642088	-0.000198252	5.39292e-45	0.753065	0.847192	0.0250142	0.322028	1.57905e-44	0.902044	0.942575	0.170313	0.577912
A5.461	A5	1	[17482197 17482512]	[17482201 17482512]	+	AT1G47570	0.0561153	0.0135185	0.0438973	0.000915485	0.000763627	-3.92202e-06	0.221552	0.000109182	0.528234	0.217285	0.927744	0.256683	0.00103752	0.758144	0.559833	0.97849
A5.1059	A5	1	[17485098 17485180]	[17485094 17485180]	+	AT1G47578_and_AT1G47580	0.0201452	0.336972	0.0316267	-0.00786776	-0.000794545	0.000206541	2.12613e-18	0.408266	0.106156	0.700246	0.148278	4.84149e-18	0.676175	0.311589	0.902773	0.369825
A5.463	A5	1	[17493925 17494021]	[17493928 17494021]	+	AT1G47600	0						1	1	1	1	1	1	1	1	1	1
A5.464	A5	1	[17493928 17494021]	[17493932 17494021]	+	AT1G47600	0.0891046	0.0171709	0.0425034	-0.00266475	0.00291257	8.85624e-05	0.400317	0.0424252	0.320016	0.0108024	0.267342	0.444117	0.1541	0.590253	0.0971401	0.524963
A5.1723	A5	1	[17538414 17538556]	[17538414 17539109]	-	AT1G47670	0.00119223	0.992394	0.00277416	0.000191071	-9.88705e-05	-6.06773e-06	0	0.404271	0.653447	0.585854	0.632277	0	0.672808	0.840275	0.849137	0.817354
A5.1724	A5	1	[17562397 17562569]	[17562397 17562564]	-	AT1G47720	0.201952	0.378322	0.226441	-0.00198241	-0.00153055	0.000391704	7.97185e-19	2.34797e-07	0.723542	0.521861	0.0189891	1.82562e-18	3.69941e-06	0.879327	0.813804	0.0929262
A5.466	A5	1	[17635170 17635431]	[17635167 17635431]	+	AT1G47870	0.0953085	0.0219121	0.163592	-0.00277089	-0.00426772	7.97581e-05	0.430718	9.79187e-09	0.447766	0.00610472	0.463328	0.475348	1.87714e-07	0.699869	0.0652265	0.696167
A5.1725	A5	1	[17772858 17773284]	[17772858 17773491]	-	AT1G48110	0.0393121	0.254213	0.0853075	0.00330694	-0.00287471	5.66433e-05	8.51775e-07	0.107317	0.625603	0.319871	0.779099	1.4602e-06	0.296408	0.824135	0.669077	0.904469
A5.1726	A5	1	[17778581 17778668]	[17778581 17778672]	-	AT1G48120	0.00291489	0.161522	-0.0878811	-0.0131448	0.00576327	0.000270431	0.000792403	0.0751268	0.0384797	0.0351955	0.153421	0.00116592	0.232606	0.15976	0.209375	0.376976
A5.467	A5	1	[17783503 17783600]	[17783499 17783600]	+	AT1G48140	0.110712	0.0385871	0.0574949	-0.00493803	0.00332605	0.000148402	0.0025961	1.21732e-05	0.00331883	3.50642e-06	0.00305743	0.00368101	0.000140817	0.0261247	0.000141635	0.0232268
A5.1066	A5	1	[17799213 17799517]	[17798584 17799517]	+	AT1G48210_and_AT1G48220	0.000215216	0.999446	-0.000636824	-1.87453e-05	5.32525e-05	6.90026e-07	0	0.378061	0.83929	0.176651	0.802164	0	0.65013	0.938674	0.505881	0.916469
A5.1067	A5	1	[17799010 17799517]	[17799213 17799517]	+	AT1G48210_and_AT1G48220	0.00144241	0.0192253	0.000833679	-0.000260479	3.80457e-05	7.45571e-06	1.77344e-06	0.839958	0.62189	0.86585	0.635668	3.00257e-06	0.947054	0.821885	0.967609	0.819937
A5.1069	A5	1	[17799010 17799517]	[17799415 17799517]	+	AT1G48210_and_AT1G48220	0.00068476	0.00447608	-0.00311691	0.000218515	0.000237605	-6.0106e-06	0.0608254	0.203184	0.48562	0.0753792	0.519757	0.0756196	0.452205	0.72815	0.328324	0.73848
A5.1729	A5	1	[17810469 17810613]	[17810469 17810617]	-	AT1G48240	0.00319988	0.995448	-0.00677832	0.000321424	0.000623638	-3.28592e-05	0	0.117764	0.562079	0.00833887	0.0466839	0	0.315146	0.780964	0.0816092	0.175558
A5.1731	A5	1	[17816023 17816909]	[17816023 17816216]	-	AT1G48260	0.0021178	0.00967747	0.00505118	-0.00077625	-0.000183336	1.50622e-05	0.108789	0.414555	0.327075	0.587246	0.523331	0.131237	0.682175	0.596456	0.849797	0.74073
A5.1730	A5	1	[17816023 17816498]	[17816023 17816909]	-	AT1G48260	0.000582598	1.00525	-0.00830465	-0.000819473	0.000555453	-5.98733e-06	0	0.439416	0.55096	0.343166	0.883743	0	0.702241	0.773481	0.687619	0.957038
A5.1733	A5	1	[17847534 17847624]	[17847534 17847628]	-	AT1G48310	0.000412055	-0.000109266	-0.00145287	0.000186142	0.000112194	-6.7665e-06	0.958273	0.474565	0.469156	0.296855	0.359905	0.972662	0.730835	0.715703	0.648013	0.611954
A5.470	A5	1	[17871742 17871823]	[17871738 17871823]	+	AT1G48360	0.0478399	0.869614	0.0760451	0.00269516	-0.00176283	-0.000138345	3.83963e-204	0.0093572	0.471599	0.269485	0.214907	1.65595e-203	0.0474223	0.717044	0.620287	0.461942
A5.1734	A5	1	[17903887 17903956]	[17903887 17903983]	-	AT1G48430	0.151295	0.063922	0.154931	-0.00621207	-0.000227199	0.000205367	3.64164e-07	2.86305e-33	0.000165689	0.746659	2.93009e-05	6.32839e-07	3.24515e-31	0.00228454	0.924129	0.000496848
A5.1736	A5	1	[17904292 17904382]	[17904292 17904407]	-	AT1G48430	0.00599791	0.993288	0.00366397	-0.00210821	0.000145872	5.97088e-05	0	0.482048	0.00156881	0.607922	0.0026534	0	0.735595	0.0146649	0.860091	0.0207558
A5.1735	A5	1	[17904500 17904576]	[17904500 17904572]	-	AT1G48430	0.0227521	0.842431	0.0547454	0.00718969	-0.00199958	-6.92938e-05	0	8.11985e-07	4.12532e-07	0.000958733	0.101475	0	1.18075e-05	1.29041e-05	0.0160923	0.293081
A5.1737	A5	1	[17909967 17910213]	[17909967 17910209]	-	AT1G48450	0.0309155	0.0172734	0.00998185	-0.000116317	0.00130835	3.85515e-05	0.00236109	0.0867622	0.876038	3.87155e-05	0.0827027	0.00335786	0.25628	0.956	0.00112503	0.257157
A5.1070	A5	1	[17912002 17912473]	[17912113 17912473]	+	AT1G48460_and_AT1G07487	0.0399923	0.696804	0.0603205	0.00855368	-0.00127051	-0.000216492	2.81492e-39	0.268549	0.220091	0.669256	0.297568	7.91554e-39	0.538145	0.479893	0.887124	0.557534
A5.1738	A5	1	[17924922 17925012]	[17924922 17925008]	-	AT1G48490	0.0592882	0.00867049	0.0962056	0.000763197	-0.00230734	-3.72797e-05	0.241761	9.75323e-37	0.432437	2.60695e-08	0.198106	0.278495	1.26962e-34	0.687445	1.83719e-06	0.440089
A5.471	A5	1	[17942176 17942264]	[17942172 17942264]	+	AT1G48520	0.00034306	1.0001	-0.000692192	2.43728e-05	6.47032e-05	-2.68016e-06	0	0.238473	0.745618	0.0434016	0.231179	0	0.501261	0.89233	0.239281	0.482528
A5.1739	A5	1	[17951839 17951943]	[17951839 17951936]	-	AT1G48550	0.0286554	0.121625	0.0295861	-0.00552177	-5.81684e-05	8.09977e-05	8.57083e-05	0.35167	0.17427	0.973224	0.503585	0.000133391	0.625301	0.419188	1	0.726756
A5.1740	A5	1	[17952173 17952264]	[17952173 17952266]	-	AT1G48550	0.011272	0.00450371	0.0159024	0.000397264	-0.000289401	1.22851e-05	0.658271	0.127927	0.766281	0.611577	0.757701	0.695853	0.334381	0.903201	0.86248	0.89294
A5.1742	A5	1	[17990339 17990435]	[17990339 17990431]	-	AT1G48650	0.0125217	-0.00130798	0.00573762	0.000359467	0.000424003	-1.07697e-05	0.658593	0.0588469	0.354875	0.0104892	0.352225	0.69611	0.195174	0.620131	0.0950698	0.60462
A5.1072	A5	1	[18041468 18041698]	[18040931 18041698]	+	AT1G48770_and_AT1G48780	0.136972	0.367309	0.199349	-0.0250424	-0.0038887	0.000540644	2.14713e-05	0.0257616	0.0282407	0.422338	0.113569	3.45792e-05	0.105822	0.128606	0.746068	0.315223
A5.1746	A5	1	[18045582 18045736]	[18045582 18045705]	-	AT1G48790	0.0101965	0.00781996	0.00292749	-7.35428e-05	0.00045431	5.16358e-06	0.0713707	0.510554	0.897204	0.0612481	0.760794	0.0880576	0.751862	0.965268	0.293538	0.894504
A5.1747	A5	1	[18070807 18070903]	[18070807 18070891]	-	AT1G48860	0.00306844	0.0108438	0.00763743	0.000350883	-0.000285562	-1.23907e-05	0.00215659	0.0351932	0.449475	0.148888	0.370076	0.00307627	0.134226	0.701235	0.47312	0.620994
A5.473	A5	1	[18151243 18151338]	[18151239 18151338]	+	AT1G49050	0.000236095	0.999863	-0.00219451	-5.053e-05	0.000151913	-3.03412e-07	0	0.0671052	0.741763	0.0201625	0.947054	0	0.214406	0.89014	0.147822	0.987407
A5.1073	A5	1	[18253869 18254041]	[18253848 18254041]	+	AT1G49340_and_AT1G49350	0.0654114	0.595932	0.0274395	-0.0110073	0.00237324	0.000277813	1.70385e-82	0.387836	0.00677789	0.170981	0.0218197	5.84891e-82	0.657526	0.0452517	0.499234	0.102416
A5.1074	A5	1	[18260385 18260750]	[18260574 18260750]	+	AT1G49340_and_AT1G49350	0.00560034	0.0353791	0.00906195	0.0019325	-0.000216351	-0.000100937	4.39194e-08	0.171692	0.0227165	0.549742	6.50803e-05	7.89172e-08	0.4073	0.110303	0.829685	0.000996428
A5.1076	A5	1	[18266245 18266331]	[18266241 18266331]	+	AT1G49340_and_AT1G49350	0.516921	0.151548	0.477371	0.0048541	0.00247188	2.0739e-05	9.33394e-06	3.57086e-42	0.279451	0.196475	0.876753	1.52789e-05	5.69237e-40	0.548583	0.5327	0.953695
A5.474	A5	1	[18283644 18283839]	[18283643 18283839]	+	AT1G49400	9.4675e-05	0.000130178	-0.000132545	-2.36687e-05	1.42012e-05	7.39648e-07	0.483003	0.4863	0.331194	0.171525	0.308136	0.526523	0.736165	0.598429	0.499234	0.563876
A5.1748	A5	1	[18315622 18316308]	[18315622 18316033]	-	AT1G49480	0.0102419	0.0322552	0.0168521	-0.000187891	-0.000413136	-9.9111e-06	3.74369e-06	0.0185004	0.837366	0.289837	0.716312	6.23879e-06	0.0817398	0.938027	0.640669	0.868622
A5.1750	A5	1	[18315622 18316308]	[18315622 18316179]	-	AT1G49480	0.00667266	0.0141974	0.0135185	-0.000947439	-0.000427864	3.82772e-05	0.0114889	0.0189834	0.198782	0.173523	0.0814377	0.0153863	0.0833791	0.452146	0.501815	0.254589
A5.475	A5	1	[18327305 18327416]	[18327100 18327416]	+	AT1G49510	0.00063341	0.996305	0.000350171	0.000324299	1.77025e-05	-8.97813e-06	0	0.724899	0.010853	0.74434	0.017937	0	0.888574	0.064344	0.923263	0.0890974
A5.476	A5	1	[18355489 18355879]	[18355796 18355879]	+	AT1G49590	0.00593883	0.105125	-0.00544039	0.00894575	0.000711202	-0.000261545	1.98575e-06	0.810439	0.00205126	0.565451	0.00248731	3.35346e-06	0.932687	0.0180484	0.837902	0.0196832
A5.1753	A5	1	[18357364 18357970]	[18357364 18357544]	-	AT1G49600	0.000353455	0.0105296	-0.00147964	-0.000159605	0.000114569	4.85506e-06	8.94444e-07	0.500926	0.570421	0.339453	0.562382	1.53185e-06	0.745725	0.786938	0.684294	0.769559
A5.1751	A5	1	[18357364 18357642]	[18357364 18357970]	-	AT1G49600	0.000602781	0.997978	0.000753767	8.41811e-05	-9.43663e-06	-8.44791e-07	0	0.0188208	0.0403155	0.58984	0.489802	0	0.0828361	0.165106	0.850669	0.715307
A5.2366	A5	1	[18370983 18371620]	[18370983 18371655]	-	AT1G49630_and_AT1G49640	0.0182116	0.873747	0.0348411	0.00780493	-0.00103935	-0.000143881	0	0.0421588	0.00037402	0.266528	0.0277224	0	0.153377	0.00449578	0.617053	0.121924
A5.2365	A5	1	[18374297 18374591]	[18374297 18374620]	-	AT1G49630_and_AT1G49640	0.0412509	-0.0084896	0.00296252	0.007342	0.00258826	-0.000105617	0.881946	0.95971	0.330347	0.425782	0.63874	0.903039	0.993781	0.598429	0.748427	0.821738
A5.2364	A5	1	[18374297 18374591]	[18374297 18374653]	-	AT1G49630_and_AT1G49640	0.0696376	0.0202429	0.0198085	0.0037578	0.00311432	-0.000120905	0.502183	0.522119	0.342577	0.065087	0.305431	0.544802	0.759615	0.609866	0.303762	0.563876
A5.1754	A5	1	[18384119 18384222]	[18384119 18384472]	-	AT1G49670	0.00657772	0.994402	-0.00170235	0.000298468	0.000517505	-3.76734e-05	0	0.652828	0.537603	0.0121889	0.00901686	0	0.847156	0.76462	0.105841	0.0537591
A5.1755	A5	1	[18392993 18393087]	[18392993 18393091]	-	AT1G49710	0.369206	0.541646	0.319022	0.00527525	0.00313647	-0.000210649	3.07914e-102	6.61557e-35	0.111165	0.0263369	0.0327715	1.1187e-101	8.08238e-33	0.31999	0.175322	0.137258
A5.477	A5	1	[18402128 18402276]	[18402153 18402276]	+	AT1G49720	0.000665133	0.000886147	0.00215168	9.61838e-05	-9.29091e-05	-7.73084e-07	0.460828	0.0808978	0.541952	0.167106	0.869326	0.505215	0.244382	0.767559	0.498717	0.951071
A5.1077	A5	1	[18447837 18447971]	[18447887 18447971]	+	AT1G49832_and_MSTRG.4702	0.110828	0.613237	0.085203	-0.0263421	0.000822739	0.000482855	9.72216e-06	0.510621	0.11154	0.902394	0.300212	1.59022e-05	0.751876	0.320669	0.981084	0.560278
A5.478	A5	1	[18452752 18453103]	[18452756 18453103]	+	AT1G49840	0.0157663	0.0252825	-0.00858759	-0.00414883	0.00152212	0.00012745	0.0371764	0.490236	0.00918062	0.0249887	0.00723079	0.0473036	0.739016	0.0567907	0.170305	0.0456383
A5.479	A5	1	[18459014 18459170]	[18459087 18459170]	+	AT1G49860	0.00946614	-0.00878603	0.0393364	0.0028014	-0.00211046	-5.32763e-05	0.649314	0.0552611	0.292485	0.0928641	0.516001	0.687311	0.186434	0.563233	0.37017	0.735418
A5.1758	A5	1	[18496750 18497083]	[18496750 18496921]	-	AT1G49950	0.239111	0.176011	0.238311	-0.00469715	-0.000185511	-9.33825e-06	0.0042769	0.000151566	0.564975	0.957679	0.96943	0.00595462	0.00138978	0.783289	0.999208	0.997291
A5.1759	A5	1	[18496750 18497128]	[18496750 18496921]	-	AT1G49950	0.00164885	0.0332589	-0.00572562	-0.000706302	0.000460904	-5.22404e-06	1.02657e-08	0.336597	0.354193	0.156224	0.818102	1.8825e-08	0.610041	0.61952	0.483896	0.924584
A5.1757	A5	1	[18496750 18497083]	[18496750 18497128]	-	AT1G49950	0.126144	0.882319	0.0937603	-0.00495666	0.002024	8.50589e-05	0	6.16026e-10	0.0105835	0.01437	0.140969	0	1.3933e-08	0.0631495	0.118794	0.358516
A5.480	A5	1	[18511962 18512089]	[18511993 18512089]	+	AT1G49980	0.365463	0.129598	0.301089	-0.00611366	0.00402338	0.000297499	0.0124805	1.5351e-08	0.369241	0.165811	0.142536	0.0166671	2.86366e-07	0.632518	0.497316	0.361002
A5.482	A5	1	[18511962 18512089]	[18511998 18512089]	+	AT1G49980	0.0993923	0.0484279	0.00164542	-0.00646998	0.00647866	0.000303272	0.266319	0.97063	0.260332	0.00889862	0.0769157	0.304654	0.997823	0.527531	0.0852129	0.244963
A5.1760	A5	1	[18515597 18515805]	[18515597 18515763]	-	AT1G50000	0.0154813	0.611529	0.0806384	0.0105845	-0.00395172	-0.000187535	6.00831e-17	0.323099	0.270501	0.341444	0.510764	1.33404e-16	0.596781	0.538688	0.685789	0.731998
A5.1761	A5	1	[18539231 18539317]	[18539231 18539454]	-	AT1G50030	0.000373341	0.997554	0.00147693	4.91398e-05	-6.89744e-05	1.11702e-06	0	0.316738	0.794586	0.391412	0.842551	0	0.590196	0.917516	0.724914	0.938091
A5.1080	A5	1	[18565175 18565265]	[18565129 18565265]	+	AT1G50120_and_AT1G50130	0.0671691	0.00676614	0.0412252	7.44298e-05	0.00162149	-7.79473e-06	0.617297	0.00300081	0.966596	0.0323859	0.88298	0.656193	0.0184062	0.994644	0.199674	0.956656
A5.1762	A5	1	[18574758 18575739]	[18574758 18575747]	-	AT1G50140	0.179669	0.838922	0.0907005	-0.00812825	0.00556052	-3.0609e-05	9.41921e-159	0.00466667	0.0475132	0.00147612	0.802233	3.82439e-158	0.0267012	0.184953	0.0226728	0.916513
A5.1763	A5	1	[18592045 18592129]	[18592045 18592153]	-	AT1G50200	0.000919592	0.996821	0.00188893	-7.29466e-05	-6.05838e-05	3.84069e-06	0	0.0166519	0.469866	0.15924	0.201585	0	0.0752226	0.716053	0.488974	0.444741
A5.486	A5	1	[18606747 18607036]	[18606757 18607036]	+	AT1G50240	0.115592	0.893726	0.0603764	-0.00132536	0.00387453	-2.45526e-05	1.53423e-40	0.380942	0.887155	0.394825	0.930504	4.36449e-40	0.652449	0.960733	0.72702	0.979805
A5.484	A5	1	[18606757 18607036]	[18606816 18607036]	+	AT1G50240	0.100275	0.191837	0.145252	0.00463619	-0.00284976	0.000131853	0.001768	0.0210859	0.569253	0.422216	0.591542	0.00253824	0.0905852	0.786204	0.745984	0.788585
A5.489	A5	1	[18609079 18609236]	[18609085 18609236]	+	AT1G50240	0.0288398	0.0431181	0.055922	-0.00348645	-0.00182948	7.20417e-05	0.136151	0.0583613	0.363077	0.265136	0.529001	0.162263	0.193921	0.626858	0.61536	0.745032
A5.487	A5	1	[18609079 18609236]	[18609126 18609236]	+	AT1G50240	0.0129626	0.0849934	0.0322724	-0.00943124	-0.00133688	0.000247118	0.000273713	0.175973	0.00230538	0.313112	0.00747266	0.000414667	0.413304	0.0197594	0.663153	0.0468475
A5.2371	A5	1	[18620089 18620330]	[18620089 18620373]	-	AT1G50260_and_AT1G50280	0.0215924	0.0286368	0.00811913	0.000423674	0.000842079	-1.86751e-05	0.0255909	0.537271	0.80133	0.240837	0.709707	0.033109	0.770948	0.920392	0.587654	0.865518
A5.2372	A5	1	[18620572 18620855]	[18620572 18620836]	-	AT1G50260_and_AT1G50280	0.0372614	0.0368004	0.0145234	-0.00188417	0.00142112	9.46686e-05	0.00793417	0.307113	0.300388	0.0669764	0.0807547	0.0107832	0.580241	0.571192	0.308793	0.253293
A5.2374	A5	1	[18631002 18631100]	[18631002 18631118]	-	AT1G50290_and_AT1G50300	0.111834	0.888049	0.0719324	-0.00515102	0.00249385	4.30924e-05	0	1.21625e-09	0.000669142	0.000112175	0.339495	0	2.64453e-08	0.00726142	0.00277267	0.592423
A5.2373	A5	1	[18631447 18631541]	[18631447 18631557]	-	AT1G50290_and_AT1G50300	0.0797304	0.657509	0.0886411	-0.00578928	-0.000556919	0.00014082	1.12848e-118	0.00233782	0.12026	0.725949	0.204663	4.24265e-118	0.0149198	0.334855	0.914947	0.448636
A5.2375	A5	1	[18631700 18631831]	[18631700 18631878]	-	AT1G50290_and_AT1G50300	0.0120772	0.969484	0.0247752	0.000795491	-0.000793623	-1.80534e-05	0	0.000691585	0.3945	0.046347	0.516627	0	0.00526057	0.654718	0.248838	0.735922
A5.490	A5	1	[18651473 18651599]	[18651451 18651599]	+	AT1G50360	0.335146	0.116205	0.261936	-0.0146691	0.00457558	0.000571897	0.00460947	4.81789e-10	0.00643459	0.0462378	0.0003635	0.00639286	1.10224e-08	0.0435548	0.248486	0.00421796
A5.491	A5	1	[18672582 18672780]	[18672304 18672780]	+	AT1G50410	0.00422571	0.974258	0.020826	-3.93804e-05	-0.00103752	2.8611e-05	0	0.0166739	0.971777	0.0288152	0.388311	0	0.0752763	0.997441	0.185045	0.637472
A5.1764	A5	1	[18684722 18684830]	[18684722 18684833]	-	AT1G50430	0.000249379	0.000118276	0.000710358	-2.44293e-05	-2.88112e-05	8.94544e-07	0.762139	0.0764037	0.633867	0.187718	0.558318	0.793034	0.23524	0.829445	0.521712	0.766274
A5.492	A5	1	[18685964 18686060]	[18685966 18686060]	+	AT1G50440	0.00310604	0.926475	0.0169969	0.00231599	-0.000868181	-4.97643e-05	0	0.314287	0.283862	0.346113	0.439612	0	0.587356	0.553682	0.689776	0.679253
A5.1765	A5	1	[18689600 18689712]	[18689600 18689701]	-	AT1G50450	0.0249557	0.0825095	-0.00105103	-0.00238668	0.00162542	0.000251659	2.20083e-13	0.927422	0.105939	0.00981798	1.05686e-08	4.54876e-13	0.980405	0.311246	0.0908925	4.40014e-07
A5.1766	A5	1	[18710133 18710666]	[18710133 18710349]	-	AT1G50500	0.0780081	0.0330772	0.0775774	-4.90856e-05	2.69153e-05	-2.33334e-05	0.00395849	4.47613e-11	0.974011	0.966584	0.60324	0.00552912	1.15227e-09	0.998634	1	0.796963
A5.1767	A5	1	[18714999 18715130]	[18714999 18715115]	-	AT1G50500	0.0222	0.00860998	0.0197186	-0.000689803	0.000155085	1.51904e-05	0.114814	0.000431064	0.335781	0.611799	0.476843	0.138176	0.00347298	0.603166	0.862523	0.70604
A5.1083	A5	1	[18717384 18717671]	[18717381 18717671]	+	AT1G50510_and_AT1G50520	0.248202	0.038046	0.157158	-0.00553592	0.00569025	0.000202452	0.0136036	2.91519e-23	0.00622889	4.27793e-11	0.000786603	0.0181013	2.02097e-21	0.0425489	5.24794e-09	0.00790048
A5.1081	A5	1	[18717384 18717671]	[18717398 18717671]	+	AT1G50510_and_AT1G50520	0.185358	0.0111414	0.125085	-0.000952441	0.00376708	4.43717e-05	0.682148	7.40245e-06	0.789677	0.0133569	0.676644	0.718241	8.94838e-05	0.915223	0.112923	0.846657
A5.1084	A5	1	[18717888 18718009]	[18717877 18718009]	+	AT1G50510_and_AT1G50520	0.0130712	0.990099	0.00658831	-0.0001385	0.000405183	-1.05581e-05	0	0.249756	0.850006	0.194466	0.628502	0	0.515813	0.944029	0.53004	0.814418
A5.1768	A5	1	[18727574 18727827]	[18727574 18728108]	-	AT1G50570	0.0100934	0.856113	0.0270615	0.000307748	-0.00106051	-6.36691e-05	0	0.10459	0.885294	0.243668	0.316498	0	0.290949	0.9598	0.591222	0.571979
A5.1769	A5	1	[18729521 18729590]	[18729521 18729594]	-	AT1G50575	0.0149623	0.969177	0.0202353	0.000669155	-0.000329563	-3.92592e-06	0	0.0234858	0.558184	0.498839	0.90821	0	0.0986034	0.778345	0.798624	0.969169
A5.1770	A5	1	[18776569 18776923]	[18776569 18776785]	-	AT1G50670	0.0981069	0.705299	0.0420755	0.00127196	0.00350196	-0.000285635	3.83364e-77	0.279677	0.79839	0.0990898	0.0542128	1.29629e-76	0.550782	0.919185	0.382923	0.194555
A5.1771	A5	1	[18776569 18776999]	[18776569 18776785]	-	AT1G50670	0.0304027	0.474708	0.0309406	0.000651823	-3.362e-05	-6.00081e-05	8.83637e-74	0.248326	0.84924	0.981656	0.556983	2.95438e-73	0.513927	0.943711	1	0.76538
A5.1772	A5	1	[18786252 18786402]	[18786252 18786368]	-	AT1G50710	0.0654409	-0.00410913	0.0690724	0.00278405	-0.000226966	-9.39653e-05	0.76596	1.07573e-06	0.124412	0.768936	0.0817718	0.7966	1.52702e-05	0.341983	0.933922	0.255274
A5.494	A5	1	[18896371 18896476]	[18896367 18896476]	+	AT1G50970	0.00174777	0.0735393	0.0257687	0.0112288	-0.00150131	-0.000319172	0.0554637	0.513004	0.0258794	0.484795	0.0335468	0.0692976	0.753741	0.121195	0.789423	0.139222
A5.495	A5	1	[18898779 18898881]	[18898788 18898881]	+	AT1G50970	0.249607	0.286808	0.286332	-0.00683299	-0.00234115	0.000139686	3.91091e-07	2.74228e-07	0.32207	0.422952	0.484429	6.78921e-07	4.29797e-06	0.592256	0.746366	0.711625
A5.498	A5	1	[18984554 18984723]	[18984561 18984723]	+	AT1G51200	0.0419785	0.0166539	0.0386058	-0.00142807	0.000210793	4.4573e-05	0.198891	0.0036966	0.401292	0.771399	0.379286	0.231871	0.0220215	0.660748	0.934393	0.629244
A5.499	A5	1	[18984756 18985687]	[18984554 18985687]	+	AT1G51200	0.050398	0.330428	0.0251052	-0.00624526	0.0015808	0.000534454	9.21013e-12	0.613583	0.326184	0.560006	0.00480307	1.83624e-11	0.822212	0.595952	0.835716	0.0332728
A5.500	A5	1	[19007628 19007825]	[19007609 19007825]	+	AT1G51270	0.01121	0.24729	-0.0150654	0.00443723	0.00164221	0.0002264	9.16699e-05	0.816312	0.592823	0.642548	0.359817	0.00014249	0.935923	0.802	0.878358	0.611874
A5.503	A5	1	[19033746 19033851]	[19033765 19033851]	+	AT1G51340	0.0751707	0.860833	0.116686	0.00105358	-0.00260339	4.69747e-05	2.82671e-258	5.12815e-06	0.750046	0.0627845	0.633904	1.29538e-257	6.38289e-05	0.895194	0.2976	0.818286
A5.1085	A5	1	[19045268 19045584]	[19045246 19045584]	+	AT1G51370_and_AT1G51360	0.0474439	0.332873	0.155229	0.00589046	-0.00673658	-0.000248797	0.00180647	0.15608	0.673986	0.25919	0.550944	0.00259159	0.381749	0.853421	0.607664	0.760837
A5.504	A5	1	[19048228 19048713]	[19048170 19048713]	+	AT1G51380	0.0162374	0.0316561	-0.0312349	-0.00395751	0.00306638	0.000107291	0.30139	0.331041	0.346	0.12648	0.413305	0.341796	0.604455	0.613004	0.436598	0.656959
A5.1777	A5	1	[19066713 19066810]	[19066713 19066899]	-	AT1G51420	0.0207642	0.896378	0.0254025	-0.00369948	-0.000289898	0.000181316	9.68419e-301	0.305874	0.243812	0.830398	0.0552167	4.60865e-300	0.57867	0.509073	0.956505	0.196942
A5.507	A5	1	[19068489 19068710]	[19068571 19068710]	+	AT1G51430	0.0520174	0.133529	0.053341	0.00639048	-8.27248e-05	-0.000243019	9.26831e-14	0.00371626	0.00659239	0.934267	0.000525491	1.93087e-13	0.0221298	0.0443146	0.992232	0.00572547
A5.506	A5	1	[19068489 19068710]	[19068612 19068710]	+	AT1G51430	0.00986366	0.0124103	0.00784972	0.000525203	0.000125871	-2.62731e-05	0.18965	0.418703	0.672371	0.81212	0.477698	0.221713	0.685724	0.852694	0.95042	0.706849
A5.505	A5	1	[19068571 19068710]	[19068612 19068710]	+	AT1G51430	0.0266238	0.0785132	0.0199702	-0.00187562	0.000378749	2.76724e-05	0.0756731	0.649145	0.737177	0.872963	0.865989	0.0931078	0.84507	0.887351	0.970546	0.949569
A5.508	A5	1	[19089581 19089673]	[19089585 19089673]	+	AT1G51470	0.12808	0.0282877	0.0193607	-0.00482489	0.00679495	0.000164254	0.374675	0.553679	0.248653	0.00013887	0.18748	0.417738	0.782232	0.514354	0.00330647	0.426072
A5.2377	A5	1	[19130651 19130791]	[19130651 19130778]	-	AT1G51560_and_AT1G51590_and_AT1G51570	0.0357153	0.083162	0.0320277	-0.00677231	0.000230477	0.000279084	2.27636e-08	0.0358756	0.00052442	0.781944	1.61517e-06	4.13342e-08	0.136288	0.00592158	0.938849	3.98908e-05
A5.1778	A5	1	[19143077 19143172]	[19143077 19143163]	-	AT1G51630	0.0193448	-0.00131357	0.0234524	0.00104437	-0.000256726	-3.48342e-05	0.797668	8.13496e-06	0.120447	0.370655	0.0821443	0.825699	9.73126e-05	0.335186	0.70983	0.256062
A5.1779	A5	1	[19159120 19159209]	[19159120 19159216]	-	AT1G51680	0.000573731	0.999779	0.000309016	-6.26465e-05	1.65447e-05	9.47294e-07	0	0.595272	0.399939	0.602135	0.669251	0	0.810387	0.659495	0.857316	0.842057
A5.512	A5	1	[19167568 19167960]	[19167565 19167960]	+	AT1G51690	0.0303723	0.731059	0.0360875	0.00245913	-0.000357198	-0.000167329	0	0.00823807	0.159352	0.631668	0.00131032	0	0.0425757	0.39758	0.872609	0.0118942
A5.513	A5	1	[19180999 19181648]	[19180994 19181648]	+	AT1G51720	0.0142459	0.0460703	0.0189118	-0.00263577	-0.000291621	6.4771e-05	4.0251e-06	0.0650865	0.0444884	0.602087	0.0974606	6.69914e-06	0.209755	0.176779	0.857316	0.285814
A5.518	A5	1	[19180999 19181648]	[19181007 19181648]	+	AT1G51720	0.0247779	0.0705505	0.0337733	-0.00437111	-0.000562211	8.70755e-05	1.05541e-08	0.00758885	0.00691748	0.415263	0.0709677	1.9342e-08	0.0398351	0.0458989	0.741874	0.231866
A5.515	A5	1	[19181113 19181648]	[19180994 19181648]	+	AT1G51720	0.0850853	0.40902	0.106958	-0.020143	-0.00254075	0.000840183	1.87596e-07	0.182542	0.0624956	0.598724	0.0118333	3.29984e-07	0.422877	0.221808	0.855424	0.0658866
A5.514	A5	1	[19180999 19181648]	[19181113 19181648]	+	AT1G51720	0.00638482	0.06129	0.0080962	0.000518938	-0.000106961	-6.54555e-05	2.95945e-10	0.417185	0.684408	0.84424	0.0853167	5.67595e-10	0.68478	0.85839	0.960317	0.262424
A5.516	A5	1	[19181113 19181648]	[19181007 19181648]	+	AT1G51720	0.147011	0.518024	0.105009	-0.0225613	0.0030789	0.000584707	3.38273e-09	0.255104	0.0594138	0.591814	0.122235	6.29223e-09	0.522645	0.215214	0.852074	0.329967
A5.517	A5	1	[19184791 19185039]	[19184651 19185039]	+	AT1G51720	0.00498008	0.994331	0.00236067	-0.000196168	0.000163713	3.88708e-06	0	0.438141	0.614555	0.324322	0.737702	0	0.701222	0.816903	0.672157	0.881848
A5.520	A5	1	[19185577 19185849]	[19185774 19185849]	+	AT1G51720	0.0564424	0.0223226	0.00805626	-0.00282863	0.00302413	0.000108855	0.00364607	0.306426	0.00500477	1.95988e-12	0.000288849	0.00510614	0.57942	0.035829	2.84248e-10	0.00348602
A5.522	A5	1	[19190044 19190150]	[19190061 19190150]	+	AT1G51740	0.0957781	0.0971527	0.161051	0.0117998	-0.00407957	-0.000375853	4.01237e-05	3.22363e-11	0.000144591	0.00206143	4.85505e-05	6.37029e-05	8.45175e-10	0.00203314	0.0293324	0.00077478
A5.524	A5	1	[19190064 19190150]	[19190044 19190150]	+	AT1G51740	0.0473646	0.894372	0.066786	0.00308946	-0.00121383	-2.11808e-05	0	3.70266e-09	0.0329962	0.049462	0.623715	0	7.54452e-08	0.143363	0.258905	0.811636
A5.523	A5	1	[19190064 19190150]	[19190061 19190150]	+	AT1G51740	0.216831	0.586579	0.298159	0.0132185	-0.00508301	-0.000170821	1.37686e-46	1.23697e-12	0.0138681	0.0264812	0.285867	4.06378e-46	3.68006e-11	0.077356	0.175619	0.545469
A5.1086	A5	1	[19192249 19192357]	[19192245 19192357]	+	AT1G51745_and_AT1G51750	0.000885932	0.999425	0.000631178	-0.000236686	1.59221e-05	8.39054e-06	0	0.820516	0.506063	0.916447	0.428842	0	0.938011	0.743543	0.986508	0.670434
A5.2379	A5	1	[19244704 19244774]	[19244704 19244835]	-	AT1G51830_and_AT1G51840	0.00337128	0.0405418	-0.0129848	-0.00447314	0.00102226	0.000191935	8.70182e-09	0.0724204	1.31759e-06	0.00952915	3.26501e-12	1.59897e-08	0.226794	3.57391e-05	0.089132	2.59547e-10
A5.2382	A5	1	[19250161 19250604]	[19250161 19250290]	-	AT1G51830_and_AT1G51840	0.00145167	0.00290703	0.0026271	-0.00062425	-4.53678e-05	4.10153e-05	0.785314	0.810349	0.657506	0.940388	0.328761	0.814466	0.932684	0.843022	0.993854	0.581382
A5.2380	A5	1	[19250211 19250604]	[19250211 19250290]	-	AT1G51830_and_AT1G51840	0.0364156	0.166396	-0.126059	-0.00754222	0.0104969	0.000530168	0.0166235	0.0785129	0.411533	0.00914832	0.0554347	0.0219116	0.23963	0.669222	0.0869111	0.197244
A5.1780	A5	1	[19261293 19261397]	[19261293 19261732]	-	AT1G51860	0.0270158	0.554254	-0.0355824	0.000390909	0.00391238	-0.000259341	4.74638e-09	0.714032	0.974898	0.460174	0.483542	8.79146e-09	0.883097	0.999165	0.772864	0.711049
A5.1787	A5	1	[19385140 19385428]	[19385140 19385232]	-	AT1G52100	0.170105	0.802611	0.0105167	0.0051646	0.00804428	-0.00074209	9.16003e-14	0.924042	0.711631	0.170847	0.075646	1.90885e-13	0.979054	0.872497	0.499234	0.242481
A5.1788	A5	1	[19385140 19385232]	[19385140 19385454]	-	AT1G52100	0.158585	0.335939	-0.140944	-0.0463625	0.0205207	0.00166145	0.00587104	0.274697	0.0075277	0.00256763	0.00160578	0.00807194	0.544823	0.0488358	0.0347282	0.0139558
A5.1786	A5	1	[19385140 19385232]	[19385140 19385479]	-	AT1G52100	0.0106397	0.924765	0.0108393	0.00307124	-1.24765e-05	-5.30365e-05	0	0.194955	0.00410108	0.978184	0.0962062	0	0.440512	0.0308487	1	0.283614
A5.1789	A5	1	[19385140 19385232]	[19385140 19385480]	-	AT1G52100	0.32249	0.137453	0.415664	0.0323241	-0.00586249	-0.000709311	0.465784	0.0345939	0.197016	0.579753	0.346765	0.510085	0.132568	0.449903	0.84516	0.59948
A5.1783	A5	1	[19385140 19385428]	[19385140 19385479]	-	AT1G52100	0.0200927	0.986867	-0.00312438	-0.000239299	0.00145107	-3.98174e-05	0	0.786837	0.871397	0.0213267	0.365978	0	0.920617	0.953787	0.153336	0.617315
A5.1785	A5	1	[19385140 19385428]	[19385140 19385480]	-	AT1G52100	0.308852	0.802508	0.0919366	-0.000810456	0.0104123	-0.000488182	0.000434905	0.681117	0.97531	0.351465	0.517063	0.000651255	0.863858	0.999246	0.694668	0.736225
A5.1790	A5	1	[19385140 19385479]	[19385140 19385454]	-	AT1G52100	0.0144216	0.0459149	-0.0306674	-0.00576765	0.00281806	0.000173382	0.000168755	0.0143217	0.000318095	3.70367e-05	0.000281055	0.000258548	0.0666766	0.00393291	0.00108668	0.00341272
A5.1791	A5	1	[19385140 19385454]	[19385140 19385480]	-	AT1G52100	0.00900328	0.522837	0.195732	0.0573902	-0.0136893	-0.00178444	0.00393969	0.283568	0.0139069	0.149483	0.00964017	0.00550312	0.55507	0.0775324	0.474015	0.0565139
A5.1782	A5	1	[19385140 19385479]	[19385140 19385480]	-	AT1G52100	0.0551103	0.0164758	0.072768	0.0054801	-0.0011036	-0.000111677	0.715553	0.116686	0.355772	0.66274	0.527654	0.74968	0.313145	0.620753	0.884334	0.743986
A5.1793	A5	1	[19454273 19454377]	[19454273 19454380]	-	AT1G52220	0.0132695	0.000595783	0.0127469	0.000120555	3.266e-05	-3.89891e-06	0.770335	1.14051e-09	0.652668	0.77492	0.625187	0.800508	2.49258e-08	0.839744	0.935723	0.812487
A5.525	A5	1	[19462237 19462342]	[19462248 19462342]	+	AT1G52260	0.185976	0.0130758	0.166638	-0.000933801	0.00120868	3.31083e-05	0.65023	1.77323e-08	0.80513	0.453912	0.769082	0.688134	3.27306e-07	0.922439	0.768988	0.898933
A5.532	A5	1	[19499284 19499680]	[19499554 19499680]	+	AT1G52360	9.47171e-05	0.00136067	0.000253011	-0.000123491	-9.89337e-06	3.17896e-06	0.00538602	0.613963	0.0543121	0.717687	0.0964016	0.00742461	0.822369	0.202737	0.910873	0.28391
A5.528	A5	1	[19505365 19505698]	[19505427 19505698]	+	AT1G52360	0.270511	0.582605	0.162571	-0.00164798	0.00674622	-0.000185376	5.58165e-114	6.75527e-10	0.624847	2.6722e-06	0.0648809	2.0809e-113	1.51752e-08	0.82377	0.00011188	0.219062
A5.526	A5	1	[19505447 19505698]	[19505365 19505698]	+	AT1G52360	0.0503169	0.0931556	0.0933346	-0.000481132	-0.00268861	1.58141e-05	1.83431e-18	1.10791e-17	0.73011	6.1542e-06	0.703533	4.18113e-18	5.19291e-16	0.883058	0.000231345	0.861852
A5.527	A5	1	[19505447 19505698]	[19505427 19505698]	+	AT1G52360	0.255279	0.117005	0.31278	6.30136e-07	-0.0035938	-7.71412e-05	8.68375e-15	7.49061e-91	0.999746	2.07032e-05	0.190965	1.8514e-14	3.98741e-88	1	0.000657955	0.430415
A5.529	A5	1	[19505365 19505698]	[19505500 19505698]	+	AT1G52360	0.08995	0.040644	-0.0348896	-0.00586104	0.00780248	0.000237351	0.10117	0.170186	0.0717141	1.88127e-08	0.014377	0.122571	0.404811	0.242757	1.35788e-06	0.0759622
A5.531	A5	1	[19505427 19505698]	[19505500 19505698]	+	AT1G52360	0.00884135	0.0261698	-0.00345653	-0.0044259	0.000768618	0.000232882	0.106791	0.83551	0.037702	0.397355	0.000242745	0.128926	0.945237	0.157541	0.728635	0.00301384
A5.530	A5	1	[19505447 19505698]	[19505500 19505698]	+	AT1G52360	0.0165215	0.00437216	-0.00267845	-0.000647128	0.0012	2.66082e-05	0.269881	0.509988	0.21343	6.27589e-08	0.0859887	0.308409	0.751691	0.471048	3.94914e-06	0.263852
A5.534	A5	1	[19506571 19507017]	[19506522 19507017]	+	AT1G52370	0.0537067	0.823358	0.0644648	0.00465932	-0.000672381	-0.000127566	0	0.000829	0.0589604	0.522739	0.0826889	0	0.00613061	0.21429	0.814448	0.257157
A5.533	A5	1	[19506522 19507381]	[19507175 19507381]	+	AT1G52370	0.06693	0.647265	0.105544	0.000415084	-0.00241339	0.000203896	1.88505e-08	0.37152	0.978085	0.707989	0.650649	3.43249e-08	0.644009	0.999928	0.906273	0.829981
A5.535	A5	1	[19509685 19509937]	[19509105 19509937]	+	AT1G52380	0.00122028	0.990272	0.00180372	0.00062504	-3.64652e-05	-1.42789e-05	0	0.334021	0.00888309	0.720348	0.0448436	0	0.607441	0.0554565	0.911961	0.170581
A5.537	A5	1	[19561993 19562346]	[19562154 19562346]	+	AT1G52500	0.0770102	0.310127	0.104328	0.00778305	-0.00234688	7.53329e-05	1.94285e-05	0.19044	0.4213	0.577334	0.794551	3.13519e-05	0.433723	0.678079	0.843809	0.91309
A5.1794	A5	1	[19564095 19564194]	[19564095 19564224]	-	AT1G52510	0.00667092	0.00309058	0.0042566	-0.00019863	0.000150895	5.93186e-06	0.0714038	0.0155024	0.377345	0.115767	0.376255	0.0880948	0.0710964	0.64016	0.415861	0.626461
A5.1795	A5	1	[19564836 19564981]	[19564836 19564999]	-	AT1G52510	0.0551415	0.0536098	0.0418104	-0.00153365	0.000833196	5.89549e-05	5.42851e-13	4.15187e-08	0.11587	0.0451425	0.0425025	1.11112e-12	7.31918e-07	0.328181	0.245386	0.16414
A5.1796	A5	1	[19571242 19571337]	[19571242 19571388]	-	AT1G52540	0.000982102	0.982454	-0.00205421	0.00102553	0.00018977	-3.95593e-05	0	0.738737	0.19311	0.572221	0.0920115	0	0.895047	0.444408	0.841488	0.275692
A5.1798	A5	1	[19640016 19640092]	[19640016 19640085]	-	AT1G52710	0.00481975	0.00628314	0.00462441	-0.00129087	1.22086e-05	5.41123e-05	0.156909	0.309846	0.0267115	0.960804	0.00182539	0.185488	0.582966	0.123779	1	0.0154125
A5.1799	A5	1	[19767141 19767220]	[19767141 19767325]	-	AT1G53040	0.0341049	0.833481	0.0471449	0.00287588	-0.000814996	-9.86891e-06	2.67651e-216	0.0834916	0.409251	0.583388	0.924282	1.17265e-215	0.249838	0.667576	0.847628	0.9768
A5.540	A5	1	[19783466 19783683]	[19783570 19783683]	+	AT1G53090	0.0901261	0.495973	0.189845	-0.0207205	-0.00681837	0.000828805	1.96665e-07	0.055217	0.10104	0.229142	0.0318114	3.4565e-07	0.186349	0.301956	0.574194	0.134628
A5.541	A5	1	[19785839 19785944]	[19785864 19785944]	+	AT1G53090	0.0489472	0.00805439	0.00952592	-0.000200639	0.00246383	3.95383e-05	0.519313	0.457544	0.902662	0.000428133	0.418595	0.561466	0.716574	0.967388	0.00847453	0.661663
A5.542	A5	1	[19793611 19793678]	[19793595 19793678]	+	AT1G53120	0.0285765	1.0013	-0.00800802	-0.00377526	0.00228653	5.36027e-06	0	0.551286	0.0281269	0.00181766	0.916676	0	0.78094	0.128245	0.0265609	0.973441
A5.545	A5	1	[19817236 19817312]	[19817224 19817312]	+	AT1G53165	0.0126915	0.925158	0.0203454	-0.00727074	-0.000478373	7.13542e-05	0	0.339984	0.00769303	0.680888	0.380019	0	0.613261	0.0496276	0.89377	0.629975
A5.547	A5	1	[19817224 19817312]	[19817248 19817312]	+	AT1G53165	0.00195294	-0.00291954	0.00138728	0.000591433	3.53536e-05	-1.8389e-05	0.261773	0.603217	0.0832722	0.808156	0.0707031	0.299879	0.815025	0.266289	0.949292	0.231378
A5.546	A5	1	[19817236 19817312]	[19817248 19817312]	+	AT1G53165	0.00866742	-0.0124175	0.00533581	0.00272259	0.000113338	-8.55915e-05	0.348814	0.746158	0.125931	0.890079	0.105226	0.391276	0.899025	0.344467	0.976624	0.300458
A5.1800	A5	1	[19842517 19842616]	[19842517 19842633]	-	AT1G53200	0.0141216	0.988268	-0.00744141	0.000308438	0.00134769	-4.83576e-05	0	0.61864	0.871885	0.098434	0.396128	0	0.825462	0.954005	0.381725	0.64408
A5.1802	A5	1	[19842517 19842650]	[19842517 19842633]	-	AT1G53200	0.10636	0.948893	0.0374757	-0.00250667	0.00430529	-0.000124927	0	0.0474769	0.300108	2.99574e-05	0.0830596	0	0.167232	0.571095	0.000899327	0.257917
A5.548	A5	1	[19846783 19846881]	[19846780 19846881]	+	AT1G53210	0.0210021	0.00672543	0.0163458	-0.000963595	0.00029102	3.09953e-05	0.000702815	9.9395e-16	0.000216603	0.00879731	6.52117e-05	0.00103774	4.00401e-14	0.00285958	0.0847601	0.000997926
A5.550	A5	1	[19857481 19857674]	[19857465 19857674]	+	AT1G53250	0.252666	0.0417928	0.218353	-0.000899575	0.00214461	3.20207e-05	0.223463	5.65465e-10	0.841764	0.264345	0.811496	0.258787	1.28186e-08	0.939918	0.614195	0.92141
A5.549	A5	1	[19858187 19858310]	[19858177 19858310]	+	AT1G53250	0.243934	0.496772	0.249901	0.00816781	-0.000372959	-0.000301974	2.34258e-49	4.43111e-13	0.0643176	0.842961	0.0217049	7.03032e-49	1.39927e-11	0.225909	0.959952	0.102118
A5.554	A5	1	[19872642 19872714]	[19872599 19872714]	+	AT1G53290	0.00558077	0.977493	0.0199951	-0.000955272	-0.000900893	4.99052e-05	0	0.0187701	0.380187	0.052272	0.123892	0	0.0826616	0.642654	0.266786	0.332902
A5.1805	A5	1	[19888088 19888304]	[19888088 19888228]	-	AT1G53310	0.0934433	0.162208	0.0924781	-0.0059915	6.03254e-05	0.000282608	6.40142e-14	3.07622e-05	0.0348149	0.960254	0.000834653	1.33829e-13	0.000330458	0.149	1	0.00828814
A5.1804	A5	1	[19888088 19888392]	[19888088 19888228]	-	AT1G53310	0.029655	0.852649	0.0531213	-0.00555045	-0.00146664	0.000270457	7.12732e-116	0.164664	0.256454	0.481908	0.063477	2.66581e-115	0.395316	0.523373	0.787659	0.21606
A5.1803	A5	1	[19888088 19888304]	[19888088 19888392]	-	AT1G53310	0.0115472	0.0320623	0.00718633	0.000190125	0.000272558	-1.49878e-05	0.0014409	0.486339	0.885538	0.628406	0.703308	0.00208308	0.736165	0.95989	0.870766	0.861806
A5.1807	A5	1	[19914702 19914867]	[19914702 19915841]	-	AT1G53380	0.000742272	1.00139	0.000625364	-0.000376359	7.30673e-06	7.60512e-06	0	0.801265	0.236406	0.957008	0.421982	0	0.928456	0.50016	0.998894	0.664548
A5.1810	A5	1	[19914702 19915050]	[19914702 19915841]	-	AT1G53380	0.000590011	0.993279	0.00138657	-4.60725e-05	-4.97848e-05	8.30709e-06	0	0.639769	0.903256	0.758061	0.462009	0	0.839234	0.967554	0.929392	0.694983
A5.1806	A5	1	[19915959 19916380]	[19915959 19916407]	-	AT1G53380	0.00942572	0.0118032	-0.0084592	-0.00167447	0.00111781	6.64956e-05	0.0916483	0.23865	0.0682834	0.00431421	0.0151052	0.111676	0.501527	0.234995	0.0509034	0.0788559
A5.555	A5	1	[19920296 19920452]	[19920292 19920452]	+	AT1G53390	0.203847	0.115046	0.132473	-0.00241582	0.00446085	7.07454e-05	7.75209e-05	9.17818e-06	0.527225	0.00618292	0.534341	0.000120974	0.000108745	0.757385	0.0656853	0.749058
A5.557	A5	1	[19920355 19920452]	[19920292 19920452]	+	AT1G53390	0.056925	0.739389	0.0730915	0.00720512	-0.00119669	-7.4597e-05	6.99157e-48	0.165495	0.289562	0.680837	0.715729	2.0794e-47	0.396799	0.559916	0.89377	0.868439
A5.556	A5	1	[19920296 19920452]	[19920355 19920452]	+	AT1G53390	0.0290745	0.0320153	0.032243	-0.000150837	-0.000198031	-1.6624e-05	0.0098521	0.011286	0.926186	0.775453	0.731837	0.0132772	0.0551536	0.977311	0.935919	0.877983
A5.558	A5	1	[19936854 19936931]	[19936852 19936931]	+	AT1G53430	0.179742	0.123877	0.146701	-0.00404654	0.00206503	5.02844e-05	0.00704596	0.00186715	0.502459	0.422201	0.779716	0.00961722	0.0123386	0.74051	0.745984	0.904767
A5.559	A5	1	[19937003 19937087]	[19937000 19937087]	+	AT1G53430	0.112888	0.0558379	0.153055	-0.00826444	-0.0025104	0.000243985	0.0338744	1.44032e-08	0.0167408	0.088333	0.0177688	0.0432868	2.70038e-07	0.0888852	0.360051	0.0885768
A5.1812	A5	1	[19972807 19972921]	[19972807 19973143]	-	AT1G53510	0.0369748	0.998974	0.0119314	-0.00679817	0.00156521	-0.000386511	3.14033e-164	0.750516	0.156779	0.444522	0.00689355	1.28466e-163	0.901185	0.394162	0.762096	0.0440036
A5.562	A5	1	[19978387 19978472]	[19978383 19978472]	+	AT1G53530	0.00560784	0.983921	0.0130173	0.00054025	-0.000463092	5.78884e-07	0	0.022505	0.459201	0.136771	0.978765	0	0.0954846	0.7076	0.454885	1
A5.560	A5	1	[19978383 19978472]	[19978393 19978472]	+	AT1G53530	0.0447919	0.0334512	0.0399953	0.00337481	0.000299787	-1.19019e-05	0.170699	0.11035	0.292338	0.826362	0.900812	0.200778	0.302098	0.56303	0.955054	0.964853
A5.563	A5	1	[19997989 19998103]	[19997972 19998103]	+	AT1G53590	0.205557	0.080089	0.094161	-0.0100687	0.00696224	0.000347677	1.47705e-05	6.88157e-07	3.33384e-05	1.71059e-11	1.51888e-06	2.39715e-05	1.01354e-05	0.00058118	2.18852e-09	3.78262e-05
A5.2383	A5	1	[20017765 20017863]	[20017765 20017858]	-	AT1G53630_and_MSTRG.5140_and_AT1G53633_and_AT1G07923_and_AT1G53635	0.00723513	0.993921	-0.00481365	-0.000443887	0.000753049	-2.1833e-05	0	0.731987	0.805027	0.326048	0.68365	0	0.892082	0.922427	0.673828	0.850721
A5.1813	A5	1	[20030667 20030943]	[20030667 20030961]	-	AT1G53650	0.153678	0.276548	0.0993185	0.00645786	0.00339745	-0.000183717	1.66042e-17	0.00287323	0.129778	0.0615969	0.148042	3.72326e-17	0.0177295	0.3509	0.294636	0.369486
A5.1814	A5	1	[20054510 20054628]	[20054510 20054633]	-	AT1G53710	0.0135006	0.0980945	-0.000124467	0.00468904	0.000851567	-0.000111975	0.000698395	0.996654	0.216955	0.598989	0.322398	0.00103137	1	0.475896	0.855699	0.578155
A5.1816	A5	1	[20055194 20055276]	[20055194 20055279]	-	AT1G53710	0.00490351	0.937731	-0.00205861	0.00306448	0.000435132	-9.25498e-05	0	0.856386	0.0352317	0.483181	0.0328168	0	0.953424	0.15038	0.788418	0.137378
A5.1815	A5	1	[20055194 20055279]	[20055194 20055281]	-	AT1G53710	0.0103268	0.0256018	0.00782688	0.00224188	0.000156243	4.1413e-07	0.125007	0.647558	0.306084	0.867149	0.994937	0.14971	0.84421	0.577189	0.968162	1
A5.1819	A5	1	[20079612 20079697]	[20079612 20080812]	-	AT1G53790	0.0211234	0.0785886	0.0534079	-0.00282413	-0.00201778	2.5209e-05	0.00447768	0.059715	0.43645	0.192248	0.815655	0.00622022	0.19729	0.690619	0.527417	0.92374
A5.565	A5	1	[20081912 20082167]	[20081900 20082167]	+	AT1G53800	0.0643023	0.398322	0.0571054	0.00390157	0.000449812	-0.000255598	3.82871e-72	0.0120668	0.180093	0.717027	0.00320585	1.27056e-71	0.0580817	0.427011	0.910774	0.0241329
A5.564	A5	1	[20082705 20082787]	[20082695 20082787]	+	AT1G53800	0.140832	0.818605	0.111929	0.00216918	0.00180642	-7.55656e-05	0	9.25501e-19	0.180374	0.00888992	0.117298	0	4.68407e-17	0.427377	0.0851988	0.321412
A5.566	A5	1	[20138239 20138720]	[20138234 20138720]	+	AT1G53920	0.0572273	0.342117	-0.0852728	-0.0261085	0.00890626	0.000794306	0.000387726	0.388638	0.0391066	0.0988478	0.03516	0.000582067	0.65765	0.161531	0.382434	0.143755
A5.1820	A5	1	[20159724 20160078]	[20159724 20159916]	-	AT1G54010	0.0131175	-0.0035625	0.00355069	0.0014361	0.000597927	-3.87785e-05	0.324231	0.3382	0.00246477	0.0031136	0.00607293	0.365959	0.611756	0.0207732	0.0401455	0.039981
A5.1821	A5	1	[20171987 20173742]	[20171987 20173852]	-	AT1G54040	0.00289578	0.994778	0.00521768	0.00014596	-0.000145114	-2.63055e-08	0	0.220234	0.790718	0.532863	0.998721	0	0.476739	0.915639	0.819883	1
A5.568	A5	1	[20199706 20199898]	[20199457 20199898]	+	AT1G54110	0.00134438	0.951581	0.00199155	0.00402154	-4.04486e-05	-9.57476e-05	0	0.859118	0.00508779	0.947314	0.0251874	0	0.954647	0.0363013	0.995784	0.113454
A5.567	A5	1	[20199992 20200103]	[20199457 20200103]	+	AT1G54110	0.00268563	0.575434	0.136968	-0.0203585	-0.010059	0.000927235	9.7892e-09	0.176457	0.128731	0.0816735	0.0228035	1.79612e-08	0.413828	0.349337	0.344248	0.105555
A5.569	A5	1	[20199992 20200103]	[20200017 20200103]	+	AT1G54110	0.000399647	-0.00884648	-0.00476877	0.00280872	0.000323026	-6.95016e-05	0.368658	0.636659	0.0296613	0.557522	0.0709236	0.411476	0.83703	0.132943	0.834512	0.231748
A5.571	A5	1	[20227528 20227664]	[20227582 20227664]	+	AT1G54180	0.0188759	0.00353964	-0.0186238	0.00128647	0.00234373	-4.6835e-05	0.839604	0.29925	0.575175	0.0166407	0.493482	0.86458	0.571873	0.789834	0.129927	0.718366
A5.2390	A5	1	[20245059 20245454]	[20245059 20245182]	-	AT1G54217_and_AT1G54220	0.000640244	0.00569668	0.00354925	-1.69442e-05	-0.000181813	-2.41487e-06	0.105838	0.326033	0.970766	0.35642	0.86085	0.127864	0.599313	0.99675	0.698356	0.946901
A5.2393	A5	1	[20245059 20245242]	[20245059 20245454]	-	AT1G54217_and_AT1G54220	0.00367586	0.991271	0.00656397	-0.000431235	-0.000180507	2.43514e-05	0	0.0990321	0.396972	0.405687	0.108423	0	0.280876	0.656809	0.733953	0.306418
A5.2386	A5	1	[20245059 20245454]	[20245059 20245374]	-	AT1G54217_and_AT1G54220	0.00243582	0.0648096	0.0065771	0.0024631	-0.00025883	-0.000118152	0.0062176	0.786655	0.428222	0.845205	0.202151	0.00852757	0.920553	0.684173	0.960914	0.445512
A5.2384	A5	1	[20245059 20245454]	[20245059 20245400]	-	AT1G54217_and_AT1G54220	0.00413525	0.0254906	-0.00212541	-0.00219291	0.000391292	0.000102031	0.0424268	0.868997	0.183496	0.577808	0.0378043	0.0536727	0.959365	0.432329	0.844153	0.151126
A5.1093	A5	1	[20255098 20255209]	[20255044 20255209]	+	AT1G54250_and_AT1G54260_and_AT1G54270_and_AT1G07957	0.00388039	0.987773	0.00585844	0.000279779	-0.000123628	-1.34467e-05	0	0.250555	0.668006	0.656716	0.489053	0	0.516961	0.849324	0.88342	0.71478
A5.1091	A5	1	[20255044 20255209]	[20255133 20255209]	+	AT1G54250_and_AT1G54260_and_AT1G54270_and_AT1G07957	0.0162166	0.00845372	0.00970505	-0.00112996	0.000406973	4.8259e-05	0.262357	0.209747	0.253699	0.334992	0.101824	0.300445	0.461622	0.520278	0.680944	0.293726
A5.1094	A5	1	[20260752 20260861]	[20260737 20260861]	+	AT1G54250_and_AT1G54260_and_AT1G54270_and_AT1G07957	0.00269237	0.00339278	-0.00326897	-0.000540122	0.000372583	1.61104e-05	0.469006	0.496466	0.379809	0.155378	0.379304	0.513425	0.742805	0.642592	0.482681	0.629244
A5.573	A5	1	[20274535 20274641]	[20274561 20274641]	+	AT1G54310	0.277561	0.0656232	0.289884	0.0270002	-0.000770209	-0.000376635	0.117811	1.64453e-11	9.45106e-07	0.742919	0.0217163	0.141548	4.44456e-10	2.6832e-05	0.922837	0.10214
A5.1822	A5	1	[20277302 20277403]	[20277302 20277408]	-	AT1G54320	0.049285	0.0134048	-0.0103	-0.00232874	0.00372406	8.62056e-05	0.0866504	0.199403	0.0233472	1.81924e-17	0.00484154	0.105889	0.447101	0.112509	5.21457e-15	0.0334475
A5.1096	A5	1	[20285691 20285796]	[20285726 20285796]	+	AT1G54340_and_AT1G54350_and_AT1G54360	0.029268	-0.00206661	0.0248248	0.00187009	0.000277702	-1.75346e-05	0.772816	0.000723982	0.0465555	0.48822	0.531098	0.80279	0.00546516	0.18232	0.791266	0.746653
A5.1098	A5	1	[20288541 20288925]	[20288396 20288925]	+	AT1G54340_and_AT1G54350_and_AT1G54360	0.441543	0.762482	0.155455	-0.00577468	0.0159586	-0.000533019	1.12335e-21	0.0643835	0.623313	0.0155593	0.140826	2.67619e-21	0.208189	0.822712	0.124659	0.358346
A5.1097	A5	1	[20288541 20288978]	[20288396 20288978]	+	AT1G54340_and_AT1G54350_and_AT1G54360	0.154045	0.931907	0.0418882	-0.00334828	0.00700981	-0.000134192	0	0.0225116	0.154017	2.58011e-12	0.0551858	0	0.0954851	0.389684	3.68005e-10	0.196922
A5.1095	A5	1	[20291378 20291457]	[20291357 20291457]	+	AT1G54340_and_AT1G54350_and_AT1G54360	0.0595884	0.0865363	0.0408373	-0.00122875	0.00117194	6.0827e-05	1.11034e-09	0.00506904	0.509824	0.140404	0.273491	2.09541e-09	0.028637	0.745506	0.460038	0.53227
A5.1824	A5	1	[20294246 20294427]	[20294246 20294436]	-	AT1G54370	0.0419407	0.0870048	-0.0536787	0.000789606	0.00597621	-2.75917e-05	0.0135406	0.137554	0.864435	0.00244181	0.841302	0.0180223	0.351671	0.950668	0.0334514	0.93733
A5.1823	A5	1	[20294246 20294427]	[20294246 20294484]	-	AT1G54370	0.27609	-0.0145463	0.272737	0.0124695	0.000209571	-0.000349333	0.774903	1.72823e-07	0.0618084	0.941317	0.0790813	0.804817	2.77878e-06	0.220512	0.993931	0.249567
A5.575	A5	1	[20325949 20326024]	[20325932 20326024]	+	AT1G54440	0.000863841	0.988696	0.00825928	0.000877317	-0.000462215	-1.88536e-05	0	0.0582247	0.115841	0.0520275	0.256734	0	0.193714	0.328181	0.266365	0.512884
A5.574	A5	1	[20326956 20327359]	[20326961 20327359]	+	AT1G54440	0.501627	0.309801	0.467455	-0.0150733	0.00213578	0.000355832	1.39361e-21	9.49847e-45	0.000404225	0.239816	0.00506962	3.31711e-21	1.64622e-42	0.00478742	0.586128	0.0346367
A5.576	A5	1	[20350729 20351270]	[20350506 20351270]	+	AT1G54490	0.00068747	0.994571	-0.000277664	-1.28041e-05	6.03209e-05	5.75308e-06	0	0.879205	0.956316	0.54505	0.40879	0	0.963547	0.990396	0.827524	0.653971
A5.577	A5	1	[20354750 20354854]	[20354743 20354854]	+	AT1G54490	0.0206308	0.948836	0.0126829	0.00234651	0.000496747	-8.99876e-05	0	0.138913	0.0323559	0.288035	0.00588103	0	0.354144	0.141385	0.638801	0.0389672
A5.1826	A5	1	[20362033 20362441]	[20362033 20362506]	-	AT1G54510	0.0482933	0.3231	0.0217073	-0.00798798	0.00166162	-5.13376e-05	6.96415e-07	0.745198	0.349943	0.648402	0.84022	1.19731e-06	0.898787	0.615336	0.881275	0.936916
A5.579	A5	1	[20365474 20365582]	[20365471 20365582]	+	AT1G54520	0.0034787	0.0129604	-0.000450656	-0.000908494	0.000245585	3.09304e-05	1.08082e-09	0.836282	0.00112939	0.0389934	0.00019875	2.04061e-09	0.94552	0.0112262	0.223435	0.00256594
A5.580	A5	1	[20473982 20474050]	[20473952 20474050]	+	AT1G54920	0.000350738	0.998989	0.000948189	4.86754e-05	-3.73407e-05	-3.5421e-07	0	0.0564947	0.444127	0.168591	0.851743	0	0.189374	0.69745	0.499234	0.942342
A5.1099	A5	1	[20516205 20516271]	[20516178 20516271]	+	AT1G55000_and_AT1G55010	0.188623	0.401602	0.234241	-0.00459495	-0.00289028	0.000246153	4.02621e-10	0.000983855	0.592926	0.437781	0.338381	7.68973e-10	0.00713594	0.802018	0.757283	0.591516
A5.1828	A5	1	[20562629 20563085]	[20562629 20562788]	-	AT1G55110	4.2508e-05	-0.00119615	0.00237895	0.000631888	-0.000146028	-1.86564e-05	0.573175	0.274751	0.023362	0.219109	0.0246493	0.613249	0.544856	0.112562	0.561823	0.111796
A5.581	A5	1	[20576162 20576244]	[20576154 20576244]	+	AT1G55150	0.0559956	0.935479	0.0732538	-0.00106504	-0.00107864	4.23418e-05	0	2.19421e-13	0.404452	0.0476872	0.265971	0	7.15238e-12	0.663696	0.253428	0.523504
A5.1104	A5	1	[20580361 20580567]	[20580381 20580567]	+	AT1G55170_and_AT1G55175	0.0190869	0.0287563	0.0193856	0.00331764	-1.86717e-05	1.00591e-05	0.195939	0.395442	0.25566	0.98803	0.907913	0.228629	0.664494	0.522489	1	0.968991
A5.1105	A5	1	[20580489 20580567]	[20580361 20580567]	+	AT1G55170_and_AT1G55175	0.025757	0.982809	0.0107514	-0.0010796	0.00093785	1.41926e-05	0	0.359064	0.471635	0.142515	0.750793	0	0.63212	0.717062	0.462781	0.889609
A5.1103	A5	1	[20581737 20584839]	[20581785 20584839]	+	AT1G55170_and_AT1G55175	0.0158214	0.996957	-0.0033847	-0.0023928	0.00120038	9.01025e-07	0	0.807981	0.179311	0.114128	0.98646	0	0.931574	0.426252	0.412998	1
A5.1101	A5	1	[20581785 20584839]	[20583785 20584839]	+	AT1G55170_and_AT1G55175	0.0155334	0.047107	0.0327425	-0.00335102	-0.00107557	0.000135677	0.000358957	0.0156161	0.0531068	0.145441	0.00858624	0.00054013	0.071541	0.199697	0.467046	0.0519029
A5.584	A5	1	[20607327 20607531]	[20607390 20607531]	+	AT1G55250	0.00108729	0.000865046	-0.000126279	0.000100192	7.58481e-05	7.78771e-08	0.71774	0.958978	0.749742	0.571181	0.993361	0.751654	0.993609	0.894995	0.84071	1
A5.582	A5	1	[20609733 20610177]	[20609697 20610177]	+	AT1G55250	0.0654786	0.801389	0.0951384	0.00388563	-0.00185374	9.29936e-06	1.09824e-232	0.000163918	0.228921	0.178262	0.923013	4.88927e-232	0.00148522	0.491404	0.507606	0.97603
A5.583	A5	1	[20609733 20610181]	[20609697 20610181]	+	AT1G55250	0.153668	0.451169	0.344738	0.0119382	-0.00942452	-1.40897e-05	9.42071e-06	0.00020746	0.273718	0.0398875	0.96251	1.54176e-05	0.00182215	0.542451	0.226831	0.994331
A5.2394	A5	1	[20619571 20619859]	[20619571 20619821]	-	AT1G55270_and_AT1G08043	0.00146287	0.0148678	-0.00130837	-0.00099447	0.000173203	2.63393e-05	0.00507507	0.810042	0.153287	0.559704	0.204304	0.00700893	0.932571	0.38876	0.835576	0.448147
A5.1107	A5	1	[20630368 20630655]	[20630135 20630655]	+	AT1G55310_and_AT1G55320	0.00221453	0.995291	0.00051967	-4.7289e-05	0.000105929	3.7414e-06	0	0.82563	0.875485	0.410412	0.677353	0	0.940611	0.955845	0.737942	0.847047
A5.1108	A5	1	[20631119 20631884]	[20631722 20631884]	+	AT1G55310_and_AT1G55320	0.177542	0.136096	0.239755	0.0344358	-0.00388827	-0.00122478	4.93986e-06	4.40092e-15	1.31284e-18	0.0197261	7.76352e-26	8.18459e-06	1.69937e-13	3.28872e-16	0.145481	3.17028e-23
A5.1109	A5	1	[20634195 20634282]	[20634191 20634282]	+	AT1G55310_and_AT1G55320	0.0837195	0.752474	0.215987	0.00838567	-0.00826671	-2.36588e-05	8.75094e-43	0.000124986	0.244381	0.00711651	0.912228	2.52654e-42	0.00116704	0.509868	0.0726269	0.971122
A5.1110	A5	1	[20634191 20634282]	[20634196 20634282]	+	AT1G55310_and_AT1G55320	0.0329529	-0.00651487	0.0743014	0.00382503	-0.00258428	-0.000137215	0.872945	0.0754351	0.4744	0.257031	0.389107	0.894644	0.233221	0.719468	0.605831	0.63813
A5.1112	A5	1	[20643830 20643932]	[20643828 20643932]	+	AT1G55325_and_AT1G55335	0.104796	0.0373686	-0.00229693	-0.00612407	0.00669329	0.000214957	0.0801879	0.916513	0.0289245	2.15185e-08	0.0100695	0.098423	0.977399	0.130543	1.54199e-06	0.0584331
A5.585	A5	1	[20652108 20652307]	[20651860 20652307]	+	AT1G55340	0.0349887	0.319258	0.0719238	-0.00230773	-0.00230845	9.93978e-05	1.41791e-12	0.119886	0.696512	0.360195	0.572878	2.87694e-12	0.319175	0.864472	0.701905	0.776301
A5.1831	A5	1	[20706234 20706675]	[20706234 20706648]	-	AT1G55450	0.0017308	0.00528573	0.00115351	-0.000358784	3.60811e-05	8.3942e-06	0.00013989	0.417872	0.0488986	0.642296	0.12199	0.000215443	0.68519	0.188646	0.878094	0.329544
A5.1833	A5	1	[20718681 20719068]	[20718681 20718830]	-	AT1G55490	0.00238385	0.00218139	0.00117821	-2.16099e-05	7.53524e-05	-1.43162e-06	0.00285412	0.116294	0.821868	0.0656017	0.61666	0.00403305	0.312623	0.930739	0.30556	0.806291
A5.1834	A5	1	[20718681 20719068]	[20718681 20718847]	-	AT1G55490	0.000395425	0.000261043	0.000342332	-2.0274e-05	3.31828e-06	5.80072e-07	0.30472	0.189522	0.543644	0.815673	0.559773	0.345362	0.432459	0.768691	0.951459	0.767599
A5.586	A5	1	[20722292 20722393]	[20722308 20722393]	+	AT1G55500	0.155623	0.126992	0.176446	-0.00407329	-0.00130145	6.11729e-05	4.50419e-10	3.0402e-17	0.127564	0.253542	0.442465	8.59382e-10	1.36489e-15	0.347308	0.602432	0.681718
A5.1835	A5	1	[20726055 20726143]	[20726055 20726147]	-	AT1G55520	0.244689	0.117334	0.324778	-0.00104578	-0.0050056	-7.78425e-05	2.30187e-08	2.32863e-51	0.704371	2.05183e-05	0.343193	4.17897e-08	5.03018e-49	0.868287	0.000653473	0.595875
A5.1837	A5	1	[20737534 20737685]	[20737534 20737642]	-	AT1G55540	0.0158974	-0.0155578	-0.000294754	0.00454122	0.00101201	-0.000110387	0.239411	0.982666	0.00888905	0.171515	0.0328097	0.275895	1	0.0554574	0.499234	0.137368
A5.1840	A5	1	[20737534 20737685]	[20737534 20737676]	-	AT1G55540	0.0259382	0.0179476	0.0142774	-0.00223818	0.0007288	6.37884e-05	0.320007	0.440639	0.344746	0.470589	0.36613	0.361574	0.703445	0.611817	0.779348	0.617466
A5.1839	A5	1	[20739402 20739582]	[20739402 20739577]	-	AT1G55540	0.0408821	0.0116003	0.0474229	-0.00110453	-0.000408799	3.80019e-05	0.445268	0.00235189	0.579756	0.630773	0.522558	0.489994	0.0149968	0.793526	0.872222	0.740091
A5.1836	A5	1	[20741794 20742063]	[20741794 20741861]	-	AT1G55540	0.0483865	-0.00411564	0.0508068	0.00337335	-0.000151266	-3.22562e-05	0.806705	0.00323732	0.12653	0.872345	0.62389	0.834359	0.0196707	0.34563	0.97035	0.811701
A5.1841	A5	1	[20788645 20788809]	[20788645 20788771]	-	AT1G55620	0.0475677	0.939444	0.0234661	-0.00039461	0.00150635	-6.38586e-05	0	0.188907	0.8629	0.12212	0.348304	0	0.431606	0.950207	0.428026	0.600899
A5.2395	A5	1	[20807310 20807730]	[20807310 20807711]	-	AT1G55680_and_AT1G55670_and_AT1G55675	0.0929561	0.0511056	0.121212	0.00350511	-0.00176601	-7.33829e-05	9.02132e-06	1.02856e-24	0.0203545	0.00612475	0.103107	1.47778e-05	7.64622e-23	0.102262	0.0653702	0.29631
A5.1843	A5	1	[20811922 20812021]	[20811922 20812172]	-	AT1G55690	0.00745384	0.97004	0.00719962	-0.000549423	1.58885e-05	3.79095e-05	0	0.310504	0.545236	0.967276	0.161269	0	0.583651	0.769797	1	0.388791
A5.1842	A5	1	[20812296 20812616]	[20812296 20812423]	-	AT1G55690	0.000610125	0.0162141	-0.00242307	-0.000115254	0.000189575	1.46908e-06	0.019828	0.734346	0.899604	0.626494	0.956958	0.0259436	0.893249	0.966281	0.870012	0.991689
A5.1844	A5	1	[20833808 20833896]	[20833808 20833902]	-	AT1G55730	0.324145	0.0650667	0.236843	0.0105464	0.00545638	-0.000112116	0.126535	5.92001e-08	0.0591871	0.0220598	0.500826	0.151401	1.02186e-06	0.2148	0.156568	0.724425
A5.1846	A5	1	[20843752 20843968]	[20843752 20843963]	-	AT1G55750	0.180591	0.20943	0.255794	-0.00908528	-0.00470024	0.000187424	6.47645e-05	1.97526e-06	0.186736	0.109178	0.36065	0.000101559	2.64998e-05	0.435946	0.402499	0.612557
A5.1847	A5	1	[20844428 20844527]	[20844428 20844508]	-	AT1G55750	0.0465676	0.00614338	0.0080941	-0.000224882	0.00240459	3.83783e-05	0.741524	0.671859	0.926708	0.0210698	0.598282	0.773708	0.858226	0.977432	0.152412	0.793468
A5.1845	A5	1	[20844760 20844889]	[20844760 20844911]	-	AT1G55750	0.0287506	0.0551599	0.0615628	-0.00369863	-0.00205076	0.000117536	0.0130427	0.0069166	0.204706	0.0991138	0.176168	0.0173891	0.036934	0.459789	0.382966	0.40991
A5.1113	A5	1	[20860831 20861270]	[20860710 20861270]	+	AT1G55810_and_AT1G55820	0.183925	0.339546	0.244423	-0.000118961	-0.00378118	0.000329968	1.2078e-30	6.76529e-16	0.975495	0.0220384	0.0042432	3.17052e-30	2.77787e-14	0.999246	0.156457	0.0300967
A5.1114	A5	1	[20865006 20865102]	[20864571 20865102]	+	AT1G55810_and_AT1G55820	0.0025248	1.00002	0.00150256	-0.000740361	6.38905e-05	9.55185e-06	0	0.787917	0.300179	0.833918	0.653712	0	0.921486	0.571134	0.957114	0.831961
A5.589	A5	1	[20874086 20874482]	[20873945 20874482]	+	AT1G55840	0.0485283	0.762513	0.115947	0.0130612	-0.00390727	-0.000197516	1.98572e-118	0.000444627	0.00179455	0.0272218	0.109259	7.45801e-118	0.00356395	0.0163296	0.17869	0.307933
A5.1849	A5	1	[20892418 20892877]	[20892418 20892835]	-	AT1G55860	0.0651339	0.0325821	0.0148819	-0.00286024	0.00314075	0.000135347	0.525281	0.777317	0.670946	0.273922	0.499848	0.567054	0.915304	0.851755	0.625192	0.723816
A5.591	A5	1	[20896852 20897052]	[20896857 20897052]	+	AT1G55870	0.0172776	0.00948937	0.0273096	0.000183453	-0.000627001	4.75716e-05	0.55001	0.0935748	0.929844	0.480383	0.443542	0.591031	0.269305	0.978489	0.786608	0.682501
A5.590	A5	1	[20897533 20897620]	[20897538 20897620]	+	AT1G55870	0.0203136	0.953536	0.0277202	-0.000286361	-0.000462917	4.08722e-05	0	0.135097	0.903965	0.64737	0.563286	0	0.347436	0.967822	0.880589	0.770111
A5.1850	A5	1	[20900833 20900947]	[20900833 20900942]	-	AT1G55880	0.291762	0.707421	0.26786	0.00192044	0.00149385	-0.000126392	3.35292e-103	1.69845e-15	0.655489	0.415705	0.324392	1.22099e-102	6.75979e-14	0.841703	0.74219	0.578859
A5.1115	A5	1	[20905284 20905374]	[20905266 20905374]	+	AT1G55900_and_AT1G55910_and_AT1G55915	0.00314996	0.00275484	-7.60848e-05	-0.000185637	0.000201628	3.74567e-06	0.262853	0.975953	0.565403	0.14313	0.697074	0.300978	1	0.783501	0.463691	0.858403
A5.592	A5	1	[20921158 20921240]	[20921169 20921240]	+	AT1G55930	0.00286322	0.0564306	0.0473038	0.00198834	-0.00277754	6.06914e-05	0.00414163	0.0191409	0.441487	0.0116846	0.43041	0.00577438	0.0838979	0.695157	0.10277	0.671931
A5.2396	A5	1	[20941507 20941649]	[20941507 20941669]	-	AT1G55980_and_AT1G55970	0.0332253	0.162156	0.0112027	-0.0168867	0.00156182	0.000562785	0.0154876	0.870492	0.0560359	0.681694	0.0327672	0.0204765	0.960212	0.206972	0.893986	0.137258
A5.593	A5	1	[20946365 20946557]	[20946374 20946557]	+	AT1G56000	0.023142	0.00343255	0.00740953	0.000294491	0.000983279	-4.0367e-06	0.662533	0.358474	0.775444	0.0255013	0.895591	0.699738	0.631652	0.908581	0.172028	0.962447
A5.594	A5	1	[20965802 20965950]	[20965782 20965950]	+	AT1G56050	0.198767	0.0472129	0.161712	-0.00719061	0.00231595	0.000221564	0.0301864	4.58394e-13	0.0118958	0.0574523	0.00929274	0.0387786	1.44295e-11	0.0689242	0.282569	0.0549101
A5.1851	A5	1	[20971111 20971665]	[20971111 20971305]	-	AT1G56070	3.73781e-05	-4.32926e-05	1.2973e-05	1.31761e-05	1.52532e-06	-2.88164e-07	0.733105	0.920659	0.429122	0.830027	0.561663	0.766104	0.978957	0.684768	0.956282	0.769047
A5.2398	A5	1	[21010820 21010930]	[21010820 21010934]	-	AT1G56140_and_AT1G56145	0.146664	0.013566	0.131204	0.00201797	0.000966251	-8.38535e-05	0.401178	2.48301e-15	0.341385	0.285339	0.184549	0.444924	9.73926e-14	0.60858	0.636233	0.421693
A5.2399	A5	1	[21026649 21026730]	[21026649 21026714]	-	AT1G56165_and_AT1G56180	0.0479545	0.108882	0.0473046	0.00657429	4.06139e-05	-0.000362543	0.03709	0.377299	0.337539	0.988914	0.0759008	0.0471997	0.649428	0.604721	1	0.242977
A5.596	A5	1	[21024796 21025104]	[21025011 21025104]	+	AT1G56170	0.101148	0.0810406	0.0146126	0.0112922	0.0055152	-0.00043659	0.38071	0.876925	0.354384	0.284997	0.229929	0.423896	0.962933	0.619714	0.636043	0.481243
A5.597	A5	1	[21030900 21031091]	[21030909 21031091]	+	AT1G56200	0.000102479	0.999854	-0.000199605	1.63189e-05	1.88802e-05	-1.25731e-06	0	0.34903	0.549563	0.104444	0.121769	0	0.622799	0.772612	0.393215	0.329297
A5.1116	A5	1	[21043889 21044347]	[21043893 21044347]	+	AT1G56220_and_AT1G08097_and_AT1G56242	0.00935109	0.811948	0.0274308	0.00153535	-0.00112998	3.44001e-05	0	0.0066586	0.235196	0.0404701	0.372047	0	0.0358161	0.498769	0.228596	0.622724
A5.1855	A5	1	[21047639 21047841]	[21047639 21047719]	-	AT1G56230	0.0277566	0.921688	0.0564915	-0.000101077	-0.00179593	7.87267e-05	0	0.00166897	0.964934	0.0669671	0.250472	0	0.0112079	0.993861	0.308793	0.505282
A5.1857	A5	1	[21073974 21074056]	[21073974 21074059]	-	AT1G56280	9.96223e-06	0.000247512	2.41811e-05	-1.55652e-05	-8.88682e-07	4.14183e-07	0.000224969	0.725346	0.0771346	0.812912	0.114441	0.000342457	0.88872	0.253264	0.95042	0.316728
A5.600	A5	1	[21082587 21082837]	[21082571 21082837]	+	AT1G56310	0.0247302	0.928828	0.0473424	0.00158465	-0.00141326	2.49686e-05	0	0.010172	0.501365	0.15965	0.722179	0	0.0508088	0.739398	0.489627	0.872316
A5.598	A5	1	[21082571 21082837]	[21082616 21082837]	+	AT1G56310	0.0203033	0.0103703	0.0389185	0.000780467	-0.00116345	-3.74e-05	0.456419	0.00644134	0.669355	0.135459	0.492214	0.500952	0.0348253	0.850358	0.452947	0.717291
A5.601	A5	1	[21096114 21096262]	[21096080 21096262]	+	AT1G56350	0.129233	0.720867	-0.0806264	-0.00285309	0.0131162	-0.000309674	6.99947e-40	0.149597	0.690228	1.73232e-05	0.146552	1.97889e-39	0.371615	0.861858	0.000566854	0.367391
A5.1117	A5	1	[21160666 21160861]	[21160667 21160861]	+	AT1G56500_and_AT1G56510	0.00613806	0.0156489	0.00740777	-6.50491e-05	-7.93575e-05	-2.06814e-06	3.74849e-10	0.00384711	0.842745	0.570315	0.832353	7.16251e-10	0.0227906	0.94038	0.840503	0.932448
A5.1859	A5	1	[21178025 21178439]	[21178025 21178450]	-	AT1G56520	0.142082	0.855302	0.159524	-0.00178462	-0.00109011	7.75889e-05	1.93924e-72	0.00106596	0.774765	0.681868	0.67629	6.44252e-72	0.00764218	0.908315	0.893993	0.846569
A5.1122	A5	1	[21256395 21256734]	[21256371 21256734]	+	AT1G56690_and_AT1G56700	0.0340294	0.0425309	-0.00278067	-0.00514332	0.00230063	0.000169279	0.0786645	0.91077	0.105194	0.0892061	0.0735099	0.0966408	0.975098	0.309683	0.361794	0.237842
A5.1864	A5	1	[21311221 21311404]	[21311221 21311412]	-	AT1G57540	0.109175	0.631824	0.183654	0.0114238	-0.00465496	-0.000133989	7.5487e-64	1.75539e-06	0.0201362	0.0263723	0.360322	2.43062e-63	2.38397e-05	0.101636	0.175322	0.612323
A5.1863	A5	1	[21311221 21311440]	[21311221 21311404]	-	AT1G57540	0.0562939	0.801806	0.0485283	-0.0279642	0.000207243	0.000764785	1.30219e-20	0.582031	0.0143413	0.965474	0.0249061	3.06041e-20	0.801612	0.0791839	1	0.112526
A5.1862	A5	1	[21311221 21311440]	[21311221 21311412]	-	AT1G57540	0.0908524	0.827946	0.132176	-0.00292654	-0.0025827	0.000196981	0	1.04024e-13	0.198163	0.00773873	0.00365039	0	3.53184e-12	0.451312	0.0769998	0.0267235
A5.2400	A5	1	[21334258 21334337]	[21334258 21334342]	-	AT1G57600_and_AT1G57590	0.0286492	0.124402	0.0171784	-0.00323714	0.00071693	0.000230514	0.000210229	0.61786	0.462462	0.702721	0.0790697	0.000320821	0.825161	0.710323	0.903988	0.249557
A5.1866	A5	1	[21364116 21364496]	[21364116 21364307]	-	AT1G57680	0.000643878	0.0296973	-0.00139894	-0.00130068	0.000127676	1.61909e-05	1.10974e-37	0.555771	1.85836e-05	0.324336	0.073674	3.08884e-37	0.784039	0.000351062	0.672157	0.23818
A5.2401	A5	1	[21435369 21435863]	[21435369 21435499]	-	AT1G57870_and_AT1G57860	0.00735782	0.0426511	0.0128801	-0.003776	-0.000345143	0.000123773	1.16561e-05	0.196888	0.00310664	0.526169	0.00114181	1.89946e-05	0.443262	0.0248681	0.815997	0.0106726
A5.1872	A5	1	[21460268 21460900]	[21460268 21460862]	-	AT1G58025	0.0291682	0.0127179	0.0334782	-0.000830071	-0.000269372	3.08582e-05	0.19249	0.000825711	0.516949	0.621866	0.418766	0.224849	0.00610929	0.750807	0.868038	0.6617
A5.1871	A5	1	[21461821 21461981]	[21461821 21462115]	-	AT1G58025	0.00189779	0.927306	0.000417255	-0.00180282	9.25337e-05	9.15323e-05	0	0.980469	0.40838	0.920727	0.158901	0	1	0.666917	0.988186	0.385185
A5.2402	A5	1	[21505769 21505851]	[21505769 21505878]	-	AT1G58060_and_AT1G58080	0.0313422	0.988067	0.00815504	-0.00155316	0.0014492	-6.77549e-06	0	0.000474486	1.96822e-07	5.03242e-30	0.446257	0	0.00377486	6.66733e-06	6.52245e-27	0.684114
A5.603	A5	1	[21529881 21529976]	[21529877 21529976]	+	AT1G58150	0.00592622	0.920506	0.00796024	0.00753016	-0.000127126	-0.00018577	1.9657e-149	0.82629	0.104663	0.948775	0.179103	7.86437e-149	0.941173	0.308742	0.996371	0.413977
A5.604	A5	1	[21533954 21534197]	[21533958 21534197]	+	AT1G58160	0.000685663	0.182552	0.0146184	-0.0146882	-0.000870793	0.000352777	6.13195e-14	0.55799	4.20921e-06	0.522385	0.000208425	1.28285e-13	0.785942	9.83358e-05	0.814153	0.00266202
A5.1874	A5	1	[21539053 21539168]	[21539053 21539174]	-	AT1G58180	0.44432	0.00819437	0.351749	0.000552351	0.00578565	-1.35288e-05	0.424179	3.61614e-245	0.681494	6.62634e-24	0.735828	0.46863	1.34747e-241	0.856821	4.81784e-21	0.880536
A5.1875	A5	1	[21552538 21552838]	[21552538 21552834]	-	AT1G58200	0.0177315	0.817397	0.0256429	-0.00177109	-0.000494461	9.38539e-05	1.77236e-206	0.34842	0.61273	0.740327	0.367986	7.66932e-206	0.622417	0.81555	0.921646	0.619287
A5.605	A5	1	[21571080 21571189]	[21571066 21571189]	+	AT1G58230	0.0568078	0.896243	0.0934353	0.000650015	-0.00228922	7.42703e-05	0	1.46808e-06	0.79344	0.0305666	0.315324	0	2.02327e-05	0.916898	0.192315	0.570792
A5.606	A5	1	[21571118 21571189]	[21571066 21571189]	+	AT1G58230	0.0240794	0.914729	0.0494037	0.00297596	-0.00158277	-5.55336e-05	0	0.0199119	0.273046	0.171583	0.492424	0	0.0865881	0.541683	0.499355	0.717491
A5.1876	A5	1	[21598664 21598764]	[21598664 21598748]	-	AT1G58250	0.0496887	0.090541	0.0386967	0.0133869	0.000686999	-0.000385301	0.0177749	0.323413	0.00758424	0.747947	0.00990307	0.0233556	0.597074	0.0491171	0.924659	0.0576809
A5.1877	A5	1	[21599861 21600049]	[21599861 21600037]	-	AT1G58250	0.00925948	0.0679566	0.0177269	-0.00640651	-0.000529215	0.000145969	9.69588e-13	0.0696525	2.98299e-07	0.320826	8.90425e-05	1.97441e-12	0.220418	9.68661e-06	0.669843	0.00129988
A5.1878	A5	1	[21665261 21665374]	[21665261 21665351]	-	AT1G58350	0.0662821	0.983623	-0.00210002	-0.000903338	0.00427388	-0.000107289	0	0.870507	0.583638	1.19218e-09	0.0289105	0	0.960212	0.796113	1.10713e-07	0.125667
A5.1879	A5	1	[21667007 21667463]	[21667007 21667179]	-	AT1G58350	0.00951158	0.567819	-0.0569252	0.0314602	0.0041523	-0.00113685	1.41558e-05	0.671382	0.0668617	0.570542	0.0262446	2.29927e-05	0.858017	0.232033	0.8406	0.117136
A5.1880	A5	1	[21667203 21667463]	[21667203 21667341]	-	AT1G58350	0.0380852	0.0192329	0.0447345	0.00111351	-0.000456592	-4.28594e-05	0.521852	0.149569	0.780019	0.789392	0.719786	0.563679	0.371613	0.910857	0.942739	0.8706
A5.873	A5	1	[21732803 21733417]	[21732791 21733417]	+	AT1G58520_locus2	0.354176	-0.00503241	0.205425	0.00457733	0.00966999	2.54272e-05	0.947941	0.0103283	0.655282	0.0306608	0.934706	0.963323	0.0514947	0.8416	0.192745	0.981831
A5.1882	A5	1	[21743609 21743760]	[21743609 21743756]	-	AT1G58590	0.204484	0.567581	0.205088	0.00402651	-3.77524e-05	6.87711e-05	3.27388e-105	1.68374e-14	0.239033	0.979345	0.499728	1.19851e-104	6.24283e-13	0.503603	1	0.723805
A5.1124	A5	1	[21746499 21753883]	[21746727 21753883]	+	AT1G58602_and_AT1G58561	0.00307441	0.0543921	0.00138524	-0.0015928	0.000105573	7.31486e-06	9.16698e-18	0.831253	0.0554761	0.765937	0.767856	2.06411e-17	0.943556	0.205589	0.932856	0.89817
A5.609	A5	1	[21832095 21832865]	[21832091 21832865]	+	AT1G59218	0.0103907	0.976939	0.0236625	0.000141281	-0.000829491	1.99318e-05	0	4.18419e-07	0.813313	0.00114738	0.263501	0	6.37031e-06	0.926226	0.0186293	0.520472
A5.1126	A5	1	[21862198 21862574]	[21862185 21862574]	+	AT1G59510_and_AT1G59520	0.0640473	-0.000622236	0.0474005	0.00535391	0.00104042	-0.000135985	0.973089	0.0122487	0.0270086	0.313538	0.0594167	0.98619	0.0587597	0.124633	0.663469	0.207309
A5.1127	A5	1	[21863944 21864145]	[21863605 21864145]	+	AT1G59510_and_AT1G59520	0.00918402	0.992588	-0.00295563	-0.000516149	0.000758728	-2.19055e-05	0	0.524914	0.385497	0.00277426	0.216425	0	0.761964	0.647674	0.0368049	0.464013
A5.1883	A5	1	[21889932 21890015]	[21889932 21890010]	-	AT1G59600	0.00966075	0.0156233	0.00735245	-0.000655092	0.000144269	3.52697e-05	0.229798	0.581718	0.701252	0.842938	0.488183	0.265617	0.801526	0.86668	0.959952	0.713966
A5.610	A5	1	[21970829 21970945]	[21969590 21970945]	+	AT1G59740	0.00931046	0.97163	0.00606976	0.000659303	0.000202544	-2.67579e-06	0	0.379026	0.455155	0.59052	0.918972	0	0.651056	0.704254	0.851064	0.974375
A5.611	A5	1	[21979619 21980383]	[21979423 21980383]	+	AT1G59750	0.0990942	0.387761	0.0664493	0.00207107	0.00204031	-0.000130788	1.40803e-23	0.0945811	0.683829	0.346764	0.38807	3.43762e-23	0.271363	0.85788	0.690355	0.63727
A5.613	A5	1	[21982995 21983071]	[21982989 21983071]	+	AT1G59750	0.031213	0.112456	0.0420792	-0.00373145	-0.000679137	3.47535e-06	5.90183e-24	0.000231886	0.0107214	0.276094	0.936428	1.44754e-23	0.00200945	0.0637807	0.627889	0.982573
A5.612	A5	1	[21982989 21983080]	[21982995 21983080]	+	AT1G59750	0.0028616	0.47365	0.049493	0.0039972	-0.00291446	0.000114754	2.52538e-78	0.0563472	0.228343	0.0394108	0.245771	8.56934e-78	0.189008	0.490744	0.224732	0.499381
A5.614	A5	1	[22014848 22015012]	[22014894 22015012]	+	AT1G59820	0.00204879	0.0187221	0.0110204	-0.00123036	-0.000560728	2.39863e-05	0.0061384	0.11588	0.17006	0.142533	0.36934	0.00842359	0.311852	0.412921	0.462781	0.620337
A5.617	A5	1	[22045568 22045686]	[22045587 22045686]	+	AT1G59890	0.0119251	0.027248	-0.0139462	-0.00571588	0.00161696	0.000218276	0.492749	0.732185	0.272958	0.467038	0.160009	0.536167	0.892113	0.541663	0.776766	0.386788
A5.616	A5	1	[22046241 22046501]	[22046226 22046501]	+	AT1G59890	0.301787	0.408679	0.378181	-0.00159596	-0.00477463	-0.000157579	2.40262e-23	2.72285e-19	0.767091	0.0377045	0.326359	5.84717e-23	1.44427e-17	0.903642	0.218409	0.578973
A5.615	A5	1	[22050596 22050768]	[22050682 22050768]	+	AT1G59890	2.99914e-05	0.999223	0.000596923	7.90213e-05	-3.54332e-05	-1.84548e-06	0	0.074427	0.0649091	0.052244	0.147946	0	0.231093	0.227426	0.266786	0.369311
A5.620	A5	1	[22052657 22053057]	[22052661 22053057]	+	AT1G59900	0.0263396	0.0050524	0.00987654	-0.000922589	0.00102894	2.9082e-05	0.0399789	9.08636e-05	0.00426977	7.78139e-14	0.00250208	0.0507028	0.000878859	0.0317966	1.36449e-11	0.0197848
A5.618	A5	1	[22052657 22053057]	[22052932 22053057]	+	AT1G59900	0.00818831	0.0140147	0.0139018	-0.000971564	-0.000357094	6.59466e-05	1.78319e-05	3.34735e-05	0.0234469	0.0507852	2.4397e-07	2.88316e-05	0.000356686	0.112843	0.262649	7.42873e-06
A5.619	A5	1	[22052932 22053057]	[22052661 22053057]	+	AT1G59900	0.463819	0.0211049	0.414458	-0.00372445	0.0030696	0.000121896	0.49816	6.51565e-41	0.344477	0.0660087	0.291635	0.541344	9.90978e-39	0.611643	0.306222	0.551591
A5.621	A5	1	[22052964 22053057]	[22052932 22053057]	+	AT1G59900	0.24411	0.311581	0.404261	-0.00616948	-0.0100094	0.000173672	0.000655057	1.63442e-05	0.6072	0.050465	0.627192	0.000969865	0.000185185	0.811541	0.261937	0.813779
A5.1887	A5	1	[22145890 22146018]	[22145890 22146001]	-	AT1G60070	0.00113979	0.00164671	-0.000377168	0.000470193	9.48096e-05	-5.63609e-06	0.675437	0.925523	0.362377	0.666667	0.714044	0.711904	0.979614	0.626172	0.885678	0.867491
A5.1128	A5	1	[22168694 22168790]	[22168708 22168790]	+	AT1G60110_and_MSTRG.5726_and_AT1G08307_and_AT1G60130	0.00392752	0.961338	0.0238066	4.98401e-05	-0.00124244	-9.56642e-05	2.90776e-133	0.553181	0.992258	0.570519	0.531914	1.12983e-132	0.782088	1	0.8406	0.747245
A5.1888	A5	1	[22180846 22181545]	[22180846 22181531]	-	AT1G60140	0.00898116	0.0384831	0.0104464	-0.00118912	-9.15767e-05	1.45993e-06	0.00506335	0.458287	0.509338	0.905134	0.978308	0.00699404	0.717028	0.745461	0.981808	1
A5.1891	A5	1	[22203749 22203878]	[22203749 22204826]	-	AT1G60200	0.00123971	0.995999	0.00429646	-0.000422718	-0.000191047	1.41627e-05	0	0.358328	0.479957	0.454042	0.42703	0	0.631533	0.723867	0.769102	0.66879
A5.1890	A5	1	[22203946 22204241]	[22203946 22204826]	-	AT1G60200	0.0551145	0.950095	0.0510926	-0.0111268	-0.000232457	0.000406437	1.55133e-29	0.53479	0.286451	0.958341	0.189752	4.02516e-29	0.769003	0.556801	0.999515	0.429029
A5.622	A5	1	[22209280 22209366]	[22209247 22209366]	+	AT1G60220	0.0158055	0.914966	0.0295748	0.00357123	-0.000860585	-0.000122461	0	0.0549864	0.0701172	0.306044	0.0371239	0	0.185718	0.239153	0.656816	0.149347
A5.1892	A5	1	[22219441 22219692]	[22219441 22219567]	-	AT1G60260	0.00697313	0.948096	0.0469186	-0.00207744	-0.00274843	2.87384e-05	1.41607e-100	0.296785	0.730786	0.283383	0.874382	5.12233e-100	0.569462	0.883511	0.634174	0.952924
A5.1893	A5	1	[22267891 22268539]	[22267891 22268316]	-	AT1G60440	0.0126081	0.938037	-0.119314	-0.00576064	0.00830669	-0.000169287	7.23487e-33	0.137819	0.580183	0.0571049	0.586167	1.93914e-32	0.352198	0.79387	0.281464	0.785085
A5.1897	A5	1	[22300267 22300661]	[22300267 22300674]	-	AT1G60525	0.311137	0.287666	0.259669	0.0165018	0.00321674	-0.000664646	5.78946e-06	6.62521e-05	0.047531	0.365001	0.007393	9.56302e-06	0.000660306	0.184998	0.704799	0.0464189
A5.1898	A5	1	[22306730 22306799]	[22306730 22306839]	-	AT1G60550	0.00948455	0.951132	0.00279835	-0.000794241	0.000417888	3.2329e-05	0	0.686355	0.37036	0.269008	0.221042	0	0.867474	0.633288	0.619844	0.470192
A5.1899	A5	1	[22329235 22329663]	[22329235 22329574]	-	AT1G60610	0.00142288	0.033272	-0.0039652	-0.000289448	0.000336755	-2.53813e-05	0.00017024	0.662306	0.803224	0.496579	0.463359	0.00026077	0.852683	0.921356	0.797217	0.696167
A5.624	A5	1	[22341188 22341305]	[22340214 22341305]	+	AT1G60650	0.00364755	0.95584	0.00244505	-0.000633487	7.51559e-05	4.82928e-05	0	0.631336	0.33119	0.786881	0.0129122	0	0.833486	0.598429	0.941542	0.0703553
A5.627	A5	1	[22343940 22344064]	[22343955 22344064]	+	AT1G60670	0.00456354	0.0288391	0.00190712	-0.00016689	0.000166026	-2.9376e-05	0.00209147	0.84278	0.892091	0.751621	0.422891	0.00298668	0.948508	0.963034	0.926438	0.665103
A5.628	A5	1	[22343940 22344064]	[22343970 22344064]	+	AT1G60670	0.00371871	0.0307121	0.0029949	-0.00164872	4.52383e-05	2.20426e-05	0.00123535	0.758783	0.186399	0.932242	0.553264	0.00179393	0.905418	0.435603	0.991627	0.762531
A5.626	A5	1	[22345640 22345817]	[22345655 22345817]	+	AT1G60670	0.0665242	0.843217	0.0737205	-0.00173724	-0.000449765	0.000156823	0	0.000369878	0.51193	0.690483	0.0469257	0	0.00303665	0.747453	0.898732	0.176045
A5.1900	A5	1	[22350679 22351084]	[22350679 22350781]	-	AT1G60690	0.0125834	0.00332555	0.00339733	-0.000600318	0.000574129	2.22029e-05	0.718841	0.719974	0.620512	0.266779	0.538822	0.752702	0.886035	0.821088	0.617252	0.752004
A5.1901	A5	1	[22358665 22358757]	[22358665 22358753]	-	AT1G60730	0.00373567	0.0123709	0.00346936	-0.000419955	1.66441e-05	7.27471e-06	3.09707e-18	0.0172926	0.0243132	0.834189	0.190415	7.03044e-18	0.0774942	0.115745	0.957198	0.429729
A5.1906	A5	1	[22416227 22416451]	[22416227 22416327]	-	AT1G60890	0.0111137	1.00261	-0.0123207	0.000301739	0.00146465	-5.51997e-05	0	0.506531	0.898822	0.147774	0.434997	0	0.748918	0.966067	0.470989	0.675977
A5.632	A5	1	[22425403 22425573]	[22425296 22425573]	+	AT1G60900	0.0823151	0.0764883	-0.0811489	-0.0144528	0.0102165	0.000497219	0.0262963	0.0215799	0.00138143	1.14242e-07	0.000221547	0.0339642	0.0923615	0.0132405	6.73034e-06	0.00279134
A5.633	A5	1	[22425403 22425926]	[22425296 22425926]	+	AT1G60900	0.0838065	0.734853	0.14514	0.0100804	-0.00383334	-5.76519e-05	2.68235e-303	7.68386e-13	0.000100071	0.000521253	0.455211	1.27897e-302	2.35412e-11	0.00149679	0.00991611	0.690444
A5.630	A5	1	[22425296 22425926]	[22425674 22425926]	+	AT1G60900	0.0950917	0.0533435	0.0456795	0.00708504	0.00308826	1.23387e-05	0.201013	0.285828	0.195697	0.18594	0.939716	0.234249	0.557992	0.448094	0.519141	0.983896
A5.631	A5	1	[22425403 22425926]	[22425674 22425926]	+	AT1G60900	0.286869	0.00911531	0.470436	0.0258717	-0.0114729	0.00021367	0.88795	1.35913e-12	0.00231278	0.00153144	0.398378	0.908615	4.01542e-11	0.0198115	0.0233396	0.646189
A5.2403	A5	1	[22438135 22438256]	[22438135 22438225]	-	AT1G60930_and_AT1G60920	0.0143116	0.707639	0.0376254	0.00105497	-0.00145711	0.000244488	5.92998e-52	0.43185	0.863233	0.576856	0.1803	1.80639e-51	0.69542	0.950293	0.843607	0.41572
A5.1907	A5	1	[22441934 22442107]	[22441934 22442100]	-	AT1G60940	0.00029374	0.190206	0.00463677	-0.0107377	-0.000271439	0.000229639	1.0045e-26	0.799275	4.17226e-06	0.784957	0.000954563	2.54131e-26	0.927963	9.76257e-05	0.940913	0.00922683
A5.2404	A5	1	[22474547 22474929]	[22474547 22474629]	-	AT1G60995_and_AT1G61000_and_AT1G61010_and_AT1G61020	0.138537	0.569143	0.0671779	0.00554488	0.00445997	-0.000593399	2.9931e-36	0.148035	0.350716	0.0783507	0.000802932	8.24549e-36	0.368891	0.616114	0.336547	0.00803446
A5.634	A5	1	[22479349 22479713]	[22479359 22479713]	+	AT1G61030	0.0181866	0.0351178	0.0336424	-0.00422235	-0.000965991	0.000161585	0.00814564	0.0134803	0.0153591	0.193443	0.00185146	0.0110585	0.0634632	0.0833526	0.529041	0.0155954
A5.635	A5	1	[22481543 22481632]	[22481547 22481632]	+	AT1G61030	0.00323836	0.0134845	0.0122983	-0.00145616	-0.000566248	3.86618e-05	0.00116939	0.00390227	0.00756711	0.0148639	0.0173169	0.00170071	0.023067	0.0490381	0.120832	0.0868531
A5.638	A5	1	[22483597 22483764]	[22483354 22483764]	+	AT1G61040	0.0430925	0.813756	0.0777076	0.000525882	-0.00216344	0.000170601	0	4.48358e-06	0.808268	0.019222	0.00824108	0	5.65378e-05	0.92362	0.143145	0.0503312
A5.636	A5	1	[22483354 22483764]	[22483637 22483764]	+	AT1G61040	0.00703889	0.00561148	0.0214783	0.00217691	-0.000902466	-6.02389e-05	0.501143	0.0120806	0.0467875	0.0532342	0.0648214	0.543792	0.0581204	0.182902	0.269457	0.219015
A5.637	A5	1	[22483597 22483764]	[22483637 22483764]	+	AT1G61040	0.0823951	0.0309823	0.169945	0.00427829	-0.0049131	0.000236524	0.650075	0.0152628	0.637236	0.2149	0.382767	0.687995	0.0701596	0.830942	0.556705	0.632482
A5.1909	A5	1	[22538274 22538538]	[22538274 22538643]	-	AT1G61140	0.0184178	0.0711923	0.0135596	-0.00556897	0.000303636	0.000112717	0.000952758	0.539592	0.0489344	0.801202	0.181011	0.0013945	0.772758	0.188711	0.946779	0.416964
A5.1912	A5	1	[22539665 22539754]	[22539665 22539749]	-	AT1G61140	0.197086	0.445528	0.429863	-0.0100362	-0.0136914	0.000862228	6.25276e-05	5.36118e-05	0.463687	0.0167799	0.0292166	9.81077e-05	0.000544892	0.711218	0.130603	0.126536
A5.1911	A5	1	[22539665 22539776]	[22539665 22539749]	-	AT1G61140	0.0462059	0.0681511	0.0689996	0.00076237	-0.00142461	9.7038e-05	0.0244427	0.0263777	0.847923	0.40068	0.41266	0.0316922	0.107671	0.943051	0.730326	0.656702
A5.1910	A5	1	[22539665 22539754]	[22539665 22539776]	-	AT1G61140	0.0367302	0.929542	0.0585352	-0.00652337	-0.00136281	0.000271972	6.53224e-281	0.0279214	0.0555045	0.348144	0.00737425	3.05741e-280	0.112548	0.205616	0.691401	0.0463475
A5.1913	A5	1	[22540217 22540463]	[22540217 22540442]	-	AT1G61140	0.000682208	0.0101356	0.000434082	-0.000604644	1.55078e-05	1.00689e-05	1.52315e-05	0.856708	0.0493153	0.905873	0.271896	2.47089e-05	0.953601	0.189542	0.982058	0.530301
A5.639	A5	1	[22542862 22542957]	[22542673 22542957]	+	AT1G61150	0.0143694	0.88694	0.0187074	-0.0011026	-0.000271126	0.000137734	0	0.425006	0.713238	0.832158	0.123373	0	0.690576	0.873168	0.956787	0.332018
A5.2406	A5	1	[22641391 22641475]	[22641391 22641506]	-	AT1G61370_and_AT1G61400_and_AT1G61360_and_AT1G61380_and_AT1G61390	0.0173893	0.00989716	0.0225042	-0.000513647	-0.000293147	1.72522e-05	0.550396	0.224449	0.817689	0.760358	0.79595	0.591361	0.482673	0.928513	0.930823	0.913818
A5.2405	A5	1	[22641391 22641475]	[22641391 22641510]	-	AT1G61370_and_AT1G61400_and_AT1G61360_and_AT1G61380_and_AT1G61390	0.00624803	0.0317286	0.0172621	-0.000972659	-0.000541855	8.20704e-06	0.212579	0.544039	0.776239	0.713553	0.93616	0.246969	0.775825	0.908936	0.909367	0.9824
A5.2407	A5	1	[22641546 22641919]	[22641546 22641654]	-	AT1G61370_and_AT1G61400_and_AT1G61360_and_AT1G61380_and_AT1G61390	0.107064	0.215801	0.437992	-0.0102819	-0.0169024	0.0003175	0.00204773	7.77832e-07	0.290538	0.000119549	0.276082	0.00292575	1.13551e-05	0.561104	0.00292412	0.535007
A5.2409	A5	1	[22649337 22650028]	[22649337 22649624]	-	AT1G61370_and_AT1G61400_and_AT1G61360_and_AT1G61380_and_AT1G61390	0.0114589	0.0166319	-0.0106003	0.0003744	0.0013787	-7.18317e-06	0.0939477	0.298077	0.773914	0.0131092	0.853253	0.114275	0.570948	0.907782	0.111494	0.942948
A5.2413	A5	1	[22665815 22665890]	[22665815 22665881]	-	AT1G61430_and_AT1G61420	0						1	1	1	1	1	1	1	1	1	1
A5.2412	A5	1	[22665815 22665890]	[22665815 22665988]	-	AT1G61430_and_AT1G61420	0.0650258	-0.0054613	0.108853	0.00164491	-0.00273921	-5.50774e-05	0.778981	4.96483e-08	0.519571	0.0118999	0.469241	0.808658	8.66013e-07	0.752298	0.104018	0.700103
A5.2416	A5	1	[22668213 22668316]	[22668213 22668291]	-	AT1G61430_and_AT1G61420	0.0388374	0.076746	0.00858336	-0.000298843	0.00189088	-3.78364e-06	0.036604	0.819752	0.950556	0.357503	0.978979	0.0466171	0.937803	0.987974	0.6992	1
A5.1915	A5	1	[22722403 22723113]	[22722403 22723059]	-	AT1G61580	0.000950569	0.00742509	0.00795405	5.08845e-06	-0.000437717	-3.15343e-06	0.154343	0.136933	0.994066	0.133538	0.877075	0.182629	0.350535	1	0.44945	0.953919
A5.1916	A5	1	[22754006 22754360]	[22754006 22754369]	-	AT1G61660	0.209566	0.705195	0.217973	-0.00126981	-0.000525448	0.000101426	3.50706e-86	3.06551e-09	0.787222	0.793365	0.469319	1.21976e-85	6.32407e-08	0.914024	0.944043	0.700148
A5.643	A5	1	[22769548 22770041]	[22769562 22770041]	+	AT1G61670	0.0990516	0.115281	0.0543559	0.00764317	0.00289595	-6.95333e-05	0.0610518	0.386841	0.346385	0.399056	0.773946	0.0758851	0.657526	0.61332	0.729443	0.901501
A5.1129	A5	1	[22906923 22907128]	[22906610 22907128]	+	AT1G61970_and_AT1G61980_and_AT1G61990_and_AT1G62000	0.0106628	0.955195	-0.0205923	-0.0120721	0.00195344	0.000356082	1.19148e-44	0.768302	0.177056	0.608466	0.181447	3.48181e-44	0.910975	0.423243	0.860291	0.417548
A5.644	A5	1	[22919661 22919790]	[22919658 22919790]	+	AT1G62020	0.00107436	0.00540932	-0.00173087	-9.96923e-05	0.000175327	7.76339e-06	0.179969	0.675791	0.850664	0.437443	0.622675	0.211041	0.860757	0.944334	0.756882	0.810707
A5.1918	A5	1	[22982945 22983032]	[22982945 22983039]	-	AT1G62200	0.133902	0.273263	0.159241	-0.00693845	-0.00158369	8.19087e-05	1.45672e-15	5.80998e-06	0.12263	0.408579	0.54076	3.14992e-15	7.17166e-05	0.339174	0.736114	0.753486
A5.1919	A5	1	[23018584 23018785]	[23018584 23018789]	-	AT1G62300	0.00859035	0.973125	0.0213577	0.00154204	-0.000797961	-2.22883e-05	0	7.3914e-14	2.42614e-05	3.00419e-07	0.0405742	0	2.54725e-12	0.000441804	1.62237e-05	0.158917
A5.1920	A5	1	[23043595 23043663]	[23043595 23043669]	-	AT1G62320	0.0484898	0.181911	0.0462673	-0.0108671	0.000222184	0.000389906	0.00590303	0.49284	0.214469	0.952745	0.135712	0.00811442	0.740577	0.472564	0.997445	0.350893
A5.647	A5	1	[23048440 23048539]	[23048431 23048539]	+	AT1G62330	0.137907	0.818095	0.172198	-0.0015412	-0.0021432	0.000126508	0	4.77751e-15	0.583739	0.0739456	0.131171	0	1.83765e-13	0.796175	0.325649	0.344057
A5.645	A5	1	[23048431 23048539]	[23048445 23048539]	+	AT1G62330	0.00895111	0.0298952	0.00607527	-0.00200875	0.00017974	3.80464e-05	0.000629943	0.498315	0.0801242	0.713453	0.265964	0.000933795	0.744079	0.259648	0.909367	0.523504
A5.1921	A5	1	[23177155 23177262]	[23177155 23177271]	-	AT1G62590	0.42247	0.133918	0.507623	-0.00423361	-0.00532206	0.000431135	0.106028	2.34318e-09	0.697057	0.251091	0.183341	0.128057	4.90178e-08	0.864472	0.599809	0.420026
A5.1922	A5	1	[23182361 23182436]	[23182361 23182684]	-	AT1G62610	0.0161966	0.71503	0.063184	-0.004632	-0.00293671	0.000196344	9.76045e-142	0.0290183	0.210941	0.0628782	0.075126	3.85427e-141	0.11591	0.467503	0.297819	0.241378
A5.1923	A5	1	[23207381 23207904]	[23207381 23207565]	-	AT1G62680	0.0273887	0.0770091	0.0341542	-0.00282055	-0.000422846	1.72745e-05	2.78172e-05	0.0700381	0.24225	0.680973	0.810046	4.45463e-05	0.221333	0.507412	0.89377	0.920535
A5.1925	A5	1	[23230152 23230579]	[23230152 23230574]	-	AT1G62730	0.0262309	0.0436895	0.0146932	-0.00295086	0.000721108	8.12684e-05	0.0112956	0.406254	0.192352	0.454986	0.228208	0.0151411	0.674487	0.443466	0.769583	0.479178
A5.2420	A5	1	[23257014 23257135]	[23257014 23257152]	-	AT1G62800_and_AT1G62810	0.00943102	0.0128991	0.00803297	0.000593238	8.73782e-05	3.09761e-06	0.156542	0.389765	0.619588	0.863845	0.930674	0.185084	0.658833	0.820412	0.966879	0.979824
A5.2422	A5	1	[23257207 23257362]	[23257207 23257821]	-	AT1G62800_and_AT1G62810	0.00733407	0.904719	0.0162324	0.00817833	-0.000691152	-0.000176662	0	0.46567	0.00264909	0.551645	0.0309249	0	0.723557	0.0219603	0.830952	0.131998
A5.2423	A5	1	[23257207 23257821]	[23257207 23257725]	-	AT1G62800_and_AT1G62810	0.000559932	0.132875	-0.0605518	-0.0119848	0.0036244	0.000316695	2.1597e-05	0.0808127	0.00471357	0.0451963	0.013064	3.47721e-05	0.244255	0.0342293	0.2454	0.0709231
A5.1927	A5	1	[23356253 23356381]	[23356253 23356339]	-	AT1G63020	7.8046e-05	1.00152	0.000123266	-0.00034497	-3.23254e-06	9.75194e-06	0	0.948389	0.163791	0.9763	0.194538	0	0.988461	0.403589	1	0.435451
A5.1140	A5	1	[23421321 23421456]	[23421305 23421456]	+	AT1G63140_and_AT1G63150_and_MSTRG.6094	0.43913	0.291314	0.597088	-0.0152352	-0.0100054	0.000812993	0.000964317	3.38537e-11	0.19058	0.042179	0.019192	0.00141093	8.85243e-10	0.441223	0.2348	0.0935766
A5.1144	A5	1	[23421377 23421456]	[23421305 23421456]	+	AT1G63140_and_AT1G63150_and_MSTRG.6094	0.0283884	0.440832	0.161362	0.0110983	-0.00706158	7.70573e-05	2.89957e-08	0.0427345	0.271265	0.0889795	0.796824	5.24459e-08	0.15494	0.539815	0.36157	0.913975
A5.1929	A5	1	[23457933 23458015]	[23457933 23458009]	-	AT1G63240	0.343713	0.425227	0.524553	0.0151325	-0.0113025	-0.000318427	1.91922e-10	1.90678e-14	0.0842665	0.00249356	0.222741	3.69992e-10	7.01741e-13	0.268145	0.0339764	0.472458
A5.1935	A5	1	[23467040 23467122]	[23467040 23467172]	-	AT1G63260	0.00595542	0.983976	-0.0105474	0.00247494	0.00103142	-0.000147399	0	0.587646	0.319974	0.331054	0.0468274	0	0.805857	0.590236	0.678012	0.175831
A5.1934	A5	1	[23467040 23467122]	[23467040 23467248]	-	AT1G63260	0.00654225	0.985754	0.000809775	-0.000946381	0.000358279	2.93439e-05	0	0.957159	0.623635	0.663076	0.6096	0	0.992829	0.823088	0.884335	0.801773
A5.1930	A5	1	[23467040 23467172]	[23467040 23467248]	-	AT1G63260	0.0622107	0.284462	0.102185	0.00170469	-0.00249838	0.000572292	9.97841e-15	0.00672797	0.723817	0.224539	6.85043e-05	2.12439e-14	0.036111	0.879327	0.568044	0.00104243
A5.1932	A5	1	[23469038 23469269]	[23469038 23469139]	-	AT1G63260	0.0184905	0.0254133	-0.0252614	-0.00466729	0.00270658	0.000147946	0.488201	0.504207	0.33294	0.1966	0.307914	0.531626	0.747384	0.600238	0.532835	0.563876
A5.1933	A5	1	[23469038 23469269]	[23469038 23469275]	-	AT1G63260	0.00590297	0.0781824	0.0205221	0.0033523	-0.000913695	0.000782218	0.381522	0.822831	0.774975	0.855009	0.0251726	0.424689	0.939074	0.908315	0.963433	0.113407
A5.2424	A5	1	[23473628 23473812]	[23473628 23473747]	-	AT1G63290_and_AT1G63295	0.157688	0.0453474	0.371231	-0.0101449	-0.0140577	0.0003801	0.749019	0.0139315	0.612079	0.106177	0.535225	0.78079	0.0651857	0.815066	0.397032	0.749521
A5.656	A5	1	[23516948 23517494]	[23517394 23517494]	+	AT1G63420	0.258505	-0.149778	0.124928	0.0373976	0.00844537	-0.00114842	0.0269027	0.071967	2.81505e-05	0.0281649	1.62094e-05	0.0347158	0.225682	0.000500696	0.182362	0.000298068
A5.655	A5	1	[23518144 23518408]	[23518327 23518408]	+	AT1G63420	0.000352723	0.00757637	-0.00462003	6.51886e-05	0.000310797	-7.49157e-06	0.0781667	0.295104	0.908075	0.196685	0.656064	0.096049	0.567864	0.96947	0.53287	0.833252
A5.657	A5	1	[23535770 23535841]	[23535756 23535841]	+	AT1G63460	0.0246386	0.0550506	0.0189407	0.00163204	0.000356115	-5.79743e-05	5.37649e-07	0.0927583	0.25758	0.562356	0.177102	9.29066e-07	0.267717	0.524771	0.836645	0.41117
A5.1940	A5	1	[23549147 23549234]	[23549147 23549232]	-	AT1G63490	0.00369333	0.912615	-0.000683765	0.00276154	0.000273569	-5.99654e-05	5.62151e-238	0.980806	0.447593	0.859952	0.579949	2.51958e-237	1	0.699709	0.965029	0.781489
A5.1941	A5	1	[23550095 23550207]	[23550095 23550182]	-	AT1G63490	0.00747283	0.0193238	0.000131883	0.00644442	0.000458809	-8.9359e-05	0.548141	0.996812	0.127038	0.798899	0.477639	0.589292	1	0.346479	0.945422	0.706849
A5.1942	A5	1	[23584920 23585017]	[23584920 23585004]	-	AT1G63610	0.016908	0.220179	0.0216946	0.00239206	-0.00029916	0.000136973	4.9836e-21	0.366137	0.436074	0.819309	0.134449	1.17812e-20	0.639351	0.690354	0.952775	0.348971
A5.1943	A5	1	[23595188 23595604]	[23595188 23595644]	-	AT1G63640	0.0649438	0.0695839	0.0753277	0.0146878	-0.000648993	-0.000506502	0.106545	0.0885618	0.00944661	0.787965	0.00266549	0.128645	0.259939	0.0579908	0.941981	0.0208388
A5.1944	A5	1	[23604878 23604972]	[23604878 23604977]	-	AT1G63660	0.0102427	-0.00555423	1.05847e-05	0.00100986	0.000639508	-3.15582e-05	0.66922	0.999367	0.553987	0.379457	0.53481	0.706171	1	0.775359	0.716522	0.749283
A5.1147	A5	1	[23619879 23620333]	[23620229 23620333]	+	AT1G63680_and_AT1G63690	0.0109973	0.0714718	0.0163551	-0.0019943	-0.000334862	0.000112167	2.86894e-14	0.0898596	0.105977	0.524407	0.00227718	6.04661e-14	0.262593	0.311309	0.81519	0.0183418
A5.1945	A5	1	[23629252 23629763]	[23629252 23629742]	-	AT1G63700	0.00325985	0.0106318	-0.00247418	-0.00115311	0.000358377	3.16352e-05	0.0438169	0.647476	0.0957692	0.224711	0.125096	0.055349	0.844183	0.292149	0.56821	0.33466
A5.1148	A5	1	[23644008 23644097]	[23644004 23644097]	+	AT1G63730_and_AT1G63740	0.00160075	0.992624	0.00529682	0.000620621	-0.000238791	-1.21034e-05	0	0.0970876	0.129382	0.18328	0.326394	0	0.276849	0.350369	0.515453	0.578973
A5.2426	A5	1	[23658332 23658415]	[23658332 23658411]	-	AT1G63770_and_AT1G63780	0.0015095	0.00455784	0.00211727	-9.09881e-05	-3.79856e-05	-2.4116e-07	1.86202e-08	0.0108734	0.392316	0.402297	0.939345	3.39097e-08	0.0536096	0.652947	0.731495	0.983788
A5.2428	A5	1	[23660644 23660721]	[23660644 23660685]	-	AT1G63770_and_AT1G63780	0.00206177	0.00617578	-0.0022456	-0.00060089	0.000269211	2.11107e-05	0.00237006	0.281351	0.0242518	0.0179161	0.00789185	0.00336982	0.552471	0.115521	0.136541	0.0487649
A5.2427	A5	1	[23663863 23664165]	[23663863 23664185]	-	AT1G63770_and_AT1G63780	0.343013	0.0989756	0.402928	-0.011911	-0.00374469	0.000375372	9.97456e-05	8.65488e-54	0.000360124	0.00852602	0.000160949	0.000154728	2.06402e-51	0.0043604	0.0829777	0.00214479
A5.2425	A5	1	[23663863 23664613]	[23663863 23664774]	-	AT1G63770_and_AT1G63780	0.00634016	0.0105206	0.0128947	-0.000365674	-0.00040966	4.22935e-06	1.11526e-08	8.82169e-12	0.130365	7.06043e-05	0.557085	2.04226e-08	2.45083e-10	0.351841	0.00186093	0.765396
A5.1948	A5	1	[23702146 23702325]	[23702146 23702237]	-	AT1G63860	0						1	1	1	1	1	1	1	1	1	1
A5.1950	A5	1	[23811345 23811457]	[23811345 23811422]	-	AT1G64150	0.0551262	0.0431304	0.018221	-0.00304976	0.00230657	0.00012631	0.192335	0.591363	0.482471	0.21286	0.328938	0.224677	0.808425	0.72546	0.553813	0.581438
A5.1949	A5	1	[23811666 23811763]	[23811666 23811774]	-	AT1G64150	0.480901	0.226569	0.470265	-0.0169891	0.000664767	0.000682958	6.88448e-05	8.09126e-16	0.0229743	0.834712	0.00215607	0.000107815	3.2996e-14	0.111119	0.957431	0.0175934
A5.1150	A5	1	[23822076 23822798]	[23822026 23822798]	+	AT1G64180_and_AT1G64185_and_AT1G08657	0.00587994	0.966028	0.00742206	0.000611474	-9.63828e-05	-1.98906e-05	0	0.696803	0.80189	0.926103	0.784147	0	0.872494	0.920708	0.989939	0.90729
A5.662	A5	1	[23960895 23961023]	[23960927 23961023]	+	AT1G64530	0.164146	0.0541985	0.0865678	0.0176552	0.00484865	-0.000253492	0.0805283	0.0065103	1.44247e-05	0.00521415	0.0366132	0.0988043	0.0351261	0.000282338	0.0583242	0.147992
A5.663	A5	1	[23996524 23996598]	[23996517 23996598]	+	AT1G64600	0.211112	0.118798	0.229517	-0.0177009	-0.0011503	0.000532409	0.0532489	0.000272561	0.0282206	0.738072	0.0267596	0.0666673	0.00232409	0.128553	0.920474	0.118777
A5.1152	A5	1	[24037804 24038052]	[24037929 24038052]	+	AT1G64680_and_AT1G64690	0.0190481	0.0493809	0.0253311	-0.00181939	-0.00039938	0.000100187	0.0354543	0.290478	0.556848	0.760483	0.278034	0.0452069	0.56201	0.777415	0.930823	0.537357
A5.664	A5	1	[24098136 24098430]	[24098308 24098430]	+	AT1G64860	0.000817528	0.00356939	0.00245743	-0.000255627	-0.000102494	6.50616e-06	0.00360697	0.0507835	0.112258	0.13535	0.174912	0.00505376	0.175357	0.321895	0.452846	0.408087
A5.665	A5	1	[24130230 24131099]	[24130979 24131099]	+	AT1G64960	0.00956152	0.908375	0.0479995	0.00397139	-0.00240238	-2.00018e-05	0	0.00238199	0.0494608	0.00531813	0.739826	0	0.015166	0.18993	0.0592593	0.882934
A5.666	A5	1	[24132606 24132777]	[24132693 24132777]	+	AT1G64960	1.59309e-05	0.996874	5.4165e-05	0.000328773	-2.38963e-06	-7.87447e-06	0	0.969486	0.069554	0.975322	0.144615	0	0.997494	0.238049	1	0.364057
A5.1951	A5	1	[24138639 24139164]	[24138639 24138730]	-	AT1G64980	0.0102123	0.00641926	0.0129366	0.000708045	-0.000170267	-2.44583e-05	0.105771	0.00148593	0.174063	0.443334	0.11506	0.127787	0.0101502	0.418937	0.761277	0.317588
A5.1952	A5	1	[24140672 24141030]	[24140672 24140994]	-	AT1G64990	0.00752465	0.00648756	0.00250281	-9.98766e-05	0.000313865	-2.90203e-06	0.0933426	0.52803	0.84397	0.146913	0.847795	0.113606	0.764177	0.940885	0.469497	0.94045
A5.1953	A5	1	[24155257 24155444]	[24155257 24155394]	-	AT1G65020	0.0413371	0.0437219	0.0366268	-0.00180191	0.000294399	2.87362e-05	1.32466e-05	0.00037513	0.171391	0.600229	0.464131	2.15487e-05	0.00307046	0.414771	0.8562	0.696407
A5.2430	A5	1	[24160340 24160443]	[24160340 24160608]	-	AT1G65032_and_AT1G65040	1.87995e-06	0.991395	0.000734769	0.00028341	-4.58056e-05	-2.07464e-06	0	0.622525	0.137785	0.573755	0.715399	0	0.828035	0.36455	0.841898	0.868396
A5.2431	A5	1	[24161996 24162201]	[24161996 24162832]	-	AT1G65032_and_AT1G65040	7.3345e-06	0.990962	0.000796402	0.00030935	-4.93167e-05	-2.47886e-06	0	0.605602	0.116953	0.557796	0.673312	0	0.816812	0.330159	0.834617	0.844828
A5.667	A5	1	[24178481 24178686]	[24178583 24178686]	+	AT1G65080	0.161868	0.00734039	0.0736885	0.00181993	0.00551119	-4.46414e-05	0.874231	0.121408	0.764943	0.0337183	0.805569	0.895746	0.322086	0.902493	0.204549	0.918113
A5.668	A5	1	[24236622 24236839]	[24236467 24236839]	+	AT1G65260	0.000341549	0.997796	-2.55791e-05	5.40117e-05	2.29455e-05	-1.81413e-06	0	0.966231	0.484733	0.48635	0.430911	0	0.996102	0.727324	0.790128	0.67222
A5.1954	A5	1	[24285924 24286098]	[24285924 24286102]	-	AT1G65370	0.0227165	0.975444	0.0287882	-0.000500729	-0.000379479	2.2166e-05	0	0.00226616	0.678109	0.460716	0.537478	0	0.0145309	0.855306	0.772903	0.750976
A5.669	A5	1	[24296313 24296426]	[24296299 24296426]	+	AT1G65410	0.225775	0.0478838	0.193057	-0.00432475	0.00204487	0.000133939	0.0124307	8.8985e-23	0.0854237	0.0564781	0.0737993	0.0166058	5.97442e-21	0.270931	0.279391	0.238436
A5.1957	A5	1	[24302463 24302697]	[24302463 24302680]	-	AT1G65430	0.299924	0.108423	0.15353	0.00268141	0.00914962	-4.87616e-05	0.0507126	0.006998	0.712759	0.00321787	0.822218	0.0636363	0.0372718	0.872957	0.0411462	0.927016
A5.1956	A5	1	[24302463 24302725]	[24302463 24302680]	-	AT1G65430	0.128473	0.0447838	0.0664151	-0.00353908	0.00387862	0.000114153	0.0311691	0.00183887	0.194485	0.000854051	0.160166	0.0399945	0.0121707	0.446587	0.0146824	0.387074
A5.1955	A5	1	[24302463 24302725]	[24302463 24302697]	-	AT1G65430	0.0458128	0.18329	0.0589363	-0.00542737	-0.000820223	0.000134247	4.29712e-26	0.000927619	0.0171442	0.398219	0.0478423	1.07889e-25	0.00677753	0.0903907	0.729031	0.178451
A5.1958	A5	1	[24314378 24314458]	[24314378 24314531]	-	AT1G65440	0.0180947	0.988862	0.00214619	-0.0010618	0.000996779	-5.14205e-05	0	0.872027	0.533354	0.170263	0.311345	0	0.960648	0.762263	0.499234	0.566999
A5.1959	A5	1	[24322631 24322762]	[24322631 24322786]	-	AT1G65470	0.018006	0.0452704	-0.0556933	-0.00253887	0.0046062	7.44013e-05	0.385956	0.2985	0.711056	0.114989	0.715607	0.429224	0.571278	0.872171	0.414459	0.868435
A5.2433	A5	1	[24363057 24363149]	[24363057 24363138]	-	AT1G65520_and_AT1G65540	0.0203355	0.0100416	0.0158783	-0.000992868	0.000278572	3.14858e-05	0.00174928	1.40643e-06	0.018388	0.120811	0.0120957	0.00251246	1.94822e-05	0.0952967	0.424893	0.0670836
A5.1960	A5	1	[24382788 24383208]	[24382788 24383225]	-	AT1G65580	0.0112812	0.968629	0.0126277	-0.000993042	-8.41613e-05	5.41371e-05	0	0.00339901	0.0717965	0.720458	0.000987165	0	0.0205069	0.242935	0.911961	0.00947132
A5.1963	A5	1	[24435738 24435829]	[24435738 24435833]	-	AT1G65700	0.00497377	0.990543	-0.0143625	-0.00144388	0.00120852	-6.03193e-05	0	0.253232	0.369317	0.0780315	0.208132	0	0.520213	0.632576	0.335659	0.453791
A5.1962	A5	1	[24435894 24436181]	[24435894 24436172]	-	AT1G65700	0						1	1	1	1	1	1	1	1	1	1
A5.1961	A5	1	[24435894 24436172]	[24435894 24436241]	-	AT1G65700	0.000126091	0.000196283	-0.000138854	1.52143e-05	1.65591e-05	-9.85088e-07	0.621079	0.733206	0.770348	0.456197	0.525849	0.659837	0.892461	0.905538	0.770014	0.742631
A5.1153	A5	1	[24552470 24555768]	[24554465 24555768]	+	AT1G65960_and_AT1G08803	0.00893804	0.101854	0.0230667	-0.00974133	-0.000883039	0.000225092	9.07741e-46	0.0017197	4.29953e-25	0.0278241	1.01909e-15	2.66704e-45	0.0114942	2.20981e-22	0.18114	1.27109e-13
A5.1968	A5	1	[24686853 24687228]	[24686853 24687145]	-	AT1G66240	0.00584878	0.017456	0.00652137	-0.000273082	-4.20369e-05	1.25988e-06	4.41088e-11	0.0164111	0.432221	0.776766	0.903207	8.65283e-11	0.0743829	0.687278	0.936405	0.96622
A5.1969	A5	1	[24696916 24697115]	[24696916 24697661]	-	AT1G66260	0.0251062	0.985022	0.0252593	-0.00444416	-9.57068e-06	0.000121662	0	0.000107967	1.01179e-07	0.978546	9.97497e-07	0	0.0010286	3.65592e-06	1	2.61525e-05
A5.1970	A5	1	[24774804 24775709]	[24774804 24775523]	-	AT1G66410	3.95863e-06	0.000923653	0.000209222	-2.89208e-05	-1.2829e-05	9.05963e-07	0.0118649	0.578513	0.548351	0.532345	0.528005	0.0158706	0.799771	0.771872	0.819748	0.744235
A5.1972	A5	1	[24817663 24817770]	[24817663 24817777]	-	AT1G66520	0.279688	3.9525e-05	0.0172966	0.0070556	0.0163995	-0.000131546	0.999346	0.726436	0.264637	1.19733e-09	0.485172	1	0.889397	0.531611	1.10846e-07	0.712217
A5.675	A5	1	[24902358 24902436]	[24902366 24902436]	+	AT1G66760	0.178478	0.00706599	0.04432	0.00141718	0.00838487	1.21906e-05	0.739105	0.041732	0.610824	1.64992e-12	0.883196	0.771562	0.152175	0.814317	2.42286e-10	0.956753
A5.1977	A5	1	[24936140 24936218]	[24936140 24936213]	-	AT1G66840	0.030545	0.0172889	0.0176055	-0.000274143	0.000808722	1.35367e-05	0.527471	0.53053	0.939153	0.597422	0.899333	0.56913	0.766458	0.98232	0.854688	0.964159
A5.1978	A5	1	[24962903 24963162]	[24962903 24963130]	-	AT1G66910	0.0345998	0.973986	0.0225452	-0.00150488	0.000753409	-1.38685e-07	0	0.0579954	0.322645	0.245543	0.997559	0	0.19321	0.592725	0.593095	1
A5.1979	A5	1	[24973602 24973729]	[24973602 24973711]	-	AT1G66940	0.154981	0.0141333	0.111763	-0.000485268	0.00270115	2.80206e-05	0.246136	3.89926e-19	0.761594	7.47996e-05	0.556565	0.283067	2.05003e-17	0.90136	0.00195252	0.765116
A5.1980	A5	1	[24995608 24995673]	[24995608 24995866]	-	AT1G66970	0.000254238	0.999539	-0.000725672	6.61224e-06	6.12444e-05	-1.42326e-06	0	0.350562	0.946993	0.148699	0.631029	0	0.624175	0.986265	0.472925	0.816272
A5.1982	A5	1	[24995608 24995800]	[24995608 24995866]	-	AT1G66970	0.000139093	1.00073	-0.000327885	-0.000164001	2.91861e-05	4.56033e-06	0	0.708405	0.143708	0.541709	0.172405	0	0.879422	0.374098	0.825821	0.404361
A5.677	A5	1	[25037148 25038083]	[25037198 25038083]	+	AT1G67060	0.0446151	0.0746554	0.0254342	-0.000571882	0.00119881	6.52068e-05	0.00015527	0.209073	0.825285	0.277811	0.398238	0.000238403	0.460573	0.932131	0.629726	0.646106
A5.676	A5	1	[25038168 25038271]	[25037148 25038271]	+	AT1G67060	0.0414017	0.131662	-0.0150148	-0.0210328	0.00352603	0.000813484	0.0241629	0.80211	0.00607047	0.280671	0.000368275	0.0313485	0.928511	0.0416576	0.631839	0.00426341
A5.2434	A5	1	[25048701 25048837]	[25048701 25048844]	-	AT1G67080_and_AT1G67090	9.22478e-07	8.99887e-06	-1.487e-06	1.9449e-08	1.50592e-07	-3.04709e-09	0.0710437	0.77123	0.976287	0.589359	0.875798	0.0876796	0.912896	0.999617	0.850498	0.953352
A5.1984	A5	1	[25102439 25102561]	[25102439 25102564]	-	AT1G67140	0.0458973	0.900966	0.0385726	0.00552829	0.000457794	-0.000201588	0	0.00166441	0.000427712	0.493936	1.62681e-05	0	0.0111899	0.00501577	0.795732	0.000298616
A5.1985	A5	1	[25109717 25109836]	[25109717 25110135]	-	AT1G67140	0.00614242	0.952669	0.00601816	0.00102243	7.76625e-06	4.87406e-06	0	0.531323	0.40584	0.988186	0.894199	0	0.767009	0.664998	1	0.961862
A5.1986	A5	1	[25114042 25114139]	[25114042 25114131]	-	AT1G67140	0.00212761	0.0242265	-0.013692	-0.00158662	0.000988724	3.91106e-05	0.0412432	0.260832	0.308479	0.136654	0.399482	0.0522329	0.529829	0.579808	0.454722	0.646852
A5.679	A5	1	[25127383 25127695]	[25127431 25127695]	+	AT1G67170	0.0033702	0.0206783	0.00469935	-0.00137123	-8.3072e-05	5.72566e-05	0.0401594	0.649405	0.299846	0.882895	0.146247	0.0509252	0.84525	0.570817	0.974383	0.366909
A5.681	A5	1	[25132935 25133043]	[25132698 25133043]	+	AT1G67190	0.0158615	0.944426	0.0541589	-8.56636e-05	-0.00239359	1.95093e-05	0	0.000103564	0.961722	0.00166111	0.713741	0	0.000992678	0.992144	0.0248333	0.867404
A5.682	A5	1	[25142786 25142942]	[25142767 25142942]	+	AT1G67210	0.00589713	0.0350824	0.00615632	-0.00210911	-1.61995e-05	0.000106664	0.190776	0.822925	0.549016	0.991388	0.309107	0.222942	0.939095	0.772243	1	0.564786
A5.1988	A5	1	[25190283 25190544]	[25190283 25190432]	-	AT1G67280	0.000319819	0.99909	0.000688854	6.97483e-05	-2.30647e-05	-2.00927e-06	0	0.0842603	0.171834	0.289315	0.186496	0	0.251306	0.415567	0.640203	0.424482
A5.1989	A5	1	[25194014 25194098]	[25194014 25194111]	-	AT1G67300	0.0271056	0.0116977	0.00466785	-0.000252024	0.00140236	6.18308e-05	0.452989	0.770366	0.901964	0.107952	0.310456	0.497462	0.912162	0.967083	0.400144	0.565933
A5.1992	A5	1	[25202096 25202189]	[25202096 25202174]	-	AT1G67310	0.264874	0.0554499	0.302166	-0.00407228	-0.00233076	0.000120018	0.119097	1.2438e-16	0.383173	0.24178	0.388364	0.142983	5.36581e-15	0.645368	0.588796	0.637472
A5.1991	A5	1	[25202729 25203023]	[25202729 25202826]	-	AT1G67310	0.000309022	0.998222	0.000207863	9.37265e-05	6.32245e-06	-1.96024e-06	0	0.851715	0.510022	0.916993	0.643772	0	0.952105	0.745648	0.986701	0.825767
A5.2435	A5	1	[25210772 25210871]	[25210772 25210883]	-	AT1G67325_and_AT1G67320	0.0720866	0.761604	0.136382	-0.0036757	-0.00401844	0.000252021	1.35021e-137	1.31106e-05	0.358573	0.0185789	0.0346307	5.29113e-137	0.000150724	0.623183	0.139774	0.142235
A5.685	A5	1	[25257506 25257602]	[25257521 25257602]	+	AT1G67420	0.158883	0.362503	0.395104	0.00633325	-0.014978	6.29043e-06	0.00015154	6.26731e-05	0.614687	0.00618104	0.986747	0.000232891	0.000628206	0.816974	0.0656853	1
A5.683	A5	1	[25258406 25258487]	[25258377 25258487]	+	AT1G67420	0.151649	0.121029	0.0811199	0.00318921	0.00440807	-0.000162993	0.191596	0.393566	0.793192	0.395427	0.652935	0.223848	0.662574	0.916861	0.727266	0.831369
A5.684	A5	1	[25258406 25258487]	[25258403 25258487]	+	AT1G67420	0.10557	0.0613528	0.0251801	0.00347694	0.00512846	-0.000197366	0.169051	0.580405	0.55636	0.0427751	0.263339	0.19895	0.80084	0.777038	0.236968	0.520349
A5.1993	A5	1	[25264664 25264747]	[25264664 25264742]	-	AT1G67440	0.0185282	-0.00210269	0.00369076	0.000306704	0.000927342	-3.94565e-06	0.732032	0.557964	0.70355	0.00696895	0.869495	0.765169	0.785942	0.8679	0.0716608	0.951105
A5.687	A5	1	[25276345 25276832]	[25276463 25276832]	+	AT1G67480	0.0156943	0.0768734	0.0127688	0.00378138	0.000182844	-5.07712e-06	8.66548e-10	0.320778	0.0215537	0.794395	0.917519	1.64157e-09	0.594563	0.106196	0.944424	0.973669
A5.688	A5	1	[25313458 25313573]	[25313475 25313573]	+	AT1G67550	0.0067037	0.0115125	0.00104577	-0.00114206	0.000353621	6.10681e-05	0.41437	0.942385	0.537301	0.654178	0.268252	0.458684	0.986308	0.764423	0.88342	0.526036
A5.1995	A5	1	[25328717 25329245]	[25328717 25329250]	-	AT1G67580	0.00929285	0.988022	0.0125842	-0.000159462	-0.000205708	1.21551e-05	0	6.80371e-06	0.655841	0.177565	0.254231	0	8.28507e-05	0.8419	0.507077	0.509639
A5.2437	A5	1	[25345984 25346428]	[25345984 25346424]	-	AT1G67630_and_AT1G67626	0.0172884	0.0932016	0.00845975	-0.00593724	0.000551788	0.000229888	3.90812e-07	0.65352	0.0138045	0.591492	0.00137528	6.78476e-07	0.847646	0.0770958	0.851826	0.0123041
A5.689	A5	1	[25372568 25372653]	[25372572 25372653]	+	AT1G67690	0.012878	0.0230263	-0.0112274	-0.00183031	0.00150659	4.60933e-05	0.14472	0.488203	0.377114	0.0881948	0.455364	0.171898	0.737625	0.640089	0.359706	0.690475
A5.690	A5	1	[25375281 25375405]	[25375278 25375405]	+	AT1G67700	0.00575566	0.00695874	0.00300036	-0.000536957	0.000172207	2.05861e-05	5.40949e-05	0.0897443	0.0176247	0.074244	0.00225901	8.515e-05	0.262308	0.0922849	0.326216	0.0182447
A5.691	A5	1	[25375712 25375803]	[25375726 25375803]	+	AT1G67700	0.28087	0.486763	0.27619	0.00710923	0.000292531	-0.00029518	0	1.13776e-261	3.59185e-12	0.502278	3.38361e-22	0	4.84523e-258	3.38839e-10	0.801162	9.2537e-20
A5.1998	A5	1	[25378488 25378562]	[25378488 25378593]	-	AT1G67710	0.405699	0.14128	0.400485	-0.00857727	0.000449272	0.000179876	0.0710766	1.28778e-06	0.379302	0.914845	0.52423	0.0877093	1.79555e-05	0.641989	0.985742	0.741509
A5.692	A5	1	[25386436 25386871]	[25386566 25386871]	+	AT1G67720	0.0376363	0.635122	0.0609198	0.00404019	-0.00145522	-0.000172953	2.62388e-28	0.302245	0.592818	0.651474	0.442311	6.747e-28	0.574979	0.802	0.882797	0.681586
A5.693	A5	1	[25388436 25388522]	[25388433 25388522]	+	AT1G67720	0.147841	0.0348933	0.00747903	-0.00445196	0.00877262	0.000152101	0.343818	0.843215	0.357468	2.1142e-05	0.291362	0.386199	0.948749	0.622292	0.00067047	0.551226
A5.1999	A5	1	[25423279 25423682]	[25423279 25423430]	-	AT1G67800	0.00390231	0.121785	-0.0492469	-0.00768142	0.00300309	0.000496767	0.0168444	0.346332	0.253934	0.301229	0.0143489	0.0221887	0.620255	0.520632	0.651973	0.075859
A5.2000	A5	1	[25423287 25423430]	[25423287 25423682]	-	AT1G67800	0.01359	0.949552	0.0309361	0.000160097	-0.00108413	1.48585e-05	0	0.044207	0.935134	0.196175	0.799873	0	0.158926	0.980643	0.532313	0.91543
A5.694	A5	1	[25438272 25439024]	[25438200 25439024]	+	AT1G67850	0.0145789	0.0010104	0.0166139	0.000969047	-0.000127185	-4.38952e-07	0.963782	0.466737	0.740042	0.918655	0.995975	0.977787	0.724376	0.888932	0.987617	1
A5.695	A5	1	[25438292 25439024]	[25438272 25439024]	+	AT1G67850	0.0372973	0.935452	0.0605098	-0.00289613	-0.00145078	0.000131165	0	0.0108632	0.340669	0.262968	0.147525	0	0.0535817	0.607777	0.612692	0.368627
A5.698	A5	1	[25457630 25457924]	[25457721 25457924]	+	AT1G67890	0.0148816	0.964128	0.00312578	-0.000153603	0.000734738	-1.92407e-06	0	0.717615	0.889526	0.119181	0.953433	0	0.885207	0.961834	0.421745	0.990136
A5.699	A5	1	[25462222 25462306]	[25461678 25462306]	+	AT1G67890	0.00469572	1.00275	-0.00245855	-0.000591837	0.000447142	4.97714e-06	0	0.345175	0.0757088	0.00164927	0.616156	0	0.619262	0.250597	0.0246935	0.80595
A5.700	A5	1	[25467159 25467618]	[25464987 25467618]	+	AT1G67900	0.023939	0.90602	0.0599791	0.00279762	-0.00225251	3.68536e-06	0	0.000266602	0.183807	0.012083	0.953141	0	0.00228046	0.432826	0.105166	0.990049
A5.703	A5	1	[25488319 25488425]	[25488321 25488425]	+	AT1G67980	0.000147805	0.996338	-0.00412953	0.000918154	0.000267333	-4.12317e-05	0	0.499072	0.240123	0.422485	0.0766539	0	0.744387	0.504911	0.746182	0.244508
A5.1154	A5	1	[25494839 25494907]	[25494836 25494907]	+	AT1G68010_and_AT1G68020	6.16253e-05	1	-2.33151e-05	-4.68404e-06	5.30877e-06	-1.64029e-07	0	0.827357	0.732003	0.362684	0.687321	0	0.941464	0.884271	0.702829	0.853141
A5.1155	A5	1	[25497161 25497478]	[25497353 25497478]	+	AT1G68010_and_AT1G68020	0.000200678	0.00673789	0.00127787	-0.000506345	-6.73245e-05	1.03299e-05	0.0258644	0.680392	0.20204	0.690769	0.382387	0.0334382	0.863562	0.456067	0.898814	0.632082
A5.705	A5	1	[25517956 25518034]	[25517946 25518034]	+	AT1G68080	0.0155508	0.0152501	0.0336924	0.000325698	-0.00113385	-3.37052e-05	0.347104	0.042887	0.878408	0.211651	0.595174	0.389533	0.155304	0.956892	0.551898	0.791177
A5.706	A5	1	[25521640 25521731]	[25521635 25521731]	+	AT1G68100	0.138935	-0.00345626	0.0905834	0.00324818	0.00302198	-9.66571e-05	0.836703	1.39772e-07	0.140001	0.00128188	0.140513	0.862064	2.28308e-06	0.368515	0.0203044	0.357916
A5.707	A5	1	[25523236 25523357]	[25523240 25523357]	+	AT1G68100	0.328384	0.0875435	0.30469	0.00253327	0.00148089	4.89131e-05	0.000913092	2.31956e-29	0.464737	0.316218	0.635678	0.00133795	2.26709e-27	0.712242	0.666189	0.819937
A5.2003	A5	1	[25540430 25541506]	[25540430 25540793]	-	AT1G68140	0.00209045	0.0261486	0.00483681	-0.000756198	-0.000171648	9.46156e-06	6.55131e-24	0.0690555	0.0263082	0.236949	0.35086	1.60644e-23	0.219134	0.122367	0.583177	0.603445
A5.2005	A5	1	[25540430 25541435]	[25540430 25541506]	-	AT1G68140	0.00775966	0.986657	0.0103439	-0.000173241	-0.000161517	1.57509e-05	0	0.00154571	0.678554	0.364847	0.206008	0	0.0105043	0.855547	0.704688	0.450658
A5.2006	A5	1	[25540840 25541506]	[25540840 25541435]	-	AT1G68140	0.00886004	0.0474208	-0.0186264	-0.00172933	0.00165611	-1.71612e-05	0.348446	0.7171	0.796761	0.574951	0.931974	0.390907	0.884991	0.918539	0.842553	0.980287
A5.708	A5	1	[25544830 25544914]	[25544780 25544914]	+	AT1G68150	0.00853473	0.0160798	0.0145814	-0.00110252	-0.000377917	2.40763e-05	0.056005	0.0911867	0.318147	0.422269	0.464387	0.0699417	0.264552	0.588701	0.746034	0.696523
A5.709	A5	1	[25559942 25560074]	[25559791 25560074]	+	AT1G68190	0.0194131	0.976056	0.0216575	-0.000319371	-0.000140275	1.87362e-05	0	1.34437e-12	0.413844	0.399945	0.107636	0	3.97577e-11	0.67186	0.729918	0.305321
A5.2007	A5	1	[25586291 25586373]	[25586291 25586375]	-	AT1G68260	0.000213339	0.0112911	0.000447877	0.00035374	-1.46586e-05	5.42841e-06	0.206404	0.961036	0.762967	0.976618	0.876563	0.24017	0.994039	0.902094	1	0.953625
A5.712	A5	1	[25599530 25599800]	[25599524 25599800]	+	AT1G68310	0.239707	-0.0125747	0.338613	0.00463351	-0.00618163	-0.000146938	0.783638	5.70746e-13	0.440798	0.0158741	0.411975	0.812927	1.77599e-11	0.694367	0.126256	0.656297
A5.711	A5	1	[25599669 25599800]	[25599524 25599800]	+	AT1G68310	0.160965	-0.0108256	0.227599	0.00431396	-0.00416464	-0.00014473	0.729373	1.34209e-12	0.293558	0.0174055	0.236942	0.762578	3.97295e-11	0.564397	0.133959	0.489279
A5.710	A5	1	[25599530 25599800]	[25599669 25599800]	+	AT1G68310	0.0643032	0.541636	0.0893413	0.00055982	-0.00156488	3.27268e-05	2.78493e-35	0.0462735	0.922247	0.522267	0.848134	7.61571e-35	0.164079	0.975661	0.814149	0.940469
A5.2008	A5	1	[25652358 25652447]	[25652358 25652454]	-	AT1G68410	0.133331	0.0194571	0.14506	-0.00082247	-0.000733057	2.2722e-05	0.268185	8.51367e-16	0.721396	0.456048	0.740922	0.306589	3.46238e-14	0.87807	0.769949	0.883687
A5.2009	A5	1	[25795288 25795399]	[25795288 25795385]	-	AT1G68710	0.0879649	0.425589	0.0377521	-0.00911407	0.0031383	0.000456023	2.53145e-29	0.331017	0.0666192	0.138549	0.00206876	6.55626e-29	0.604449	0.231486	0.457455	0.0170594
A5.2010	A5	1	[25797999 25798203]	[25797999 25798191]	-	AT1G68710	0.00636895	0.999069	0.00336583	-0.000597342	0.000187695	4.14206e-06	0	0.656188	0.536886	0.649067	0.885727	0	0.84868	0.764335	0.88149	0.957864
A5.713	A5	1	[25866864 25866961]	[25866882 25866961]	+	AT1G68820	0.220311	0.211015	0.225122	-0.00600299	-0.00030074	0.00012264	2.07928e-10	3.86646e-11	0.168369	0.871432	0.344927	4.00616e-10	1.00138e-09	0.410299	0.969985	0.597621
A5.2445	A5	1	[25887804 25887983]	[25887804 25887985]	-	AT1G68872_and_AT1G68862	0.296372	0.663013	0.360187	-0.00565394	-0.00398274	0.000218622	9.32524e-38	2.12989e-12	0.386399	0.149974	0.253652	2.59799e-37	6.23692e-11	0.648567	0.474852	0.508875
A5.2438	A5	1	[25887804 25888051]	[25887804 25887985]	-	AT1G68872_and_AT1G68862	0.0351823	0.876026	-0.0302306	0.00435406	0.00392234	-0.000204768	5.31372e-50	0.559265	0.499552	0.139468	0.241589	1.6018e-49	0.786726	0.738342	0.458586	0.494736
A5.2446	A5	1	[25888071 25888779]	[25888071 25888219]	-	AT1G68872_and_AT1G68862	0.00568789	0.0392383	0.00617246	-0.001057	-3.02859e-05	1.99898e-05	1.76763e-05	0.510424	0.37835	0.952796	0.576061	2.85832e-05	0.751862	0.64094	0.997445	0.778475
A5.2439	A5	1	[25888929 25889103]	[25888929 25889070]	-	AT1G68872_and_AT1G68862	0.135675	0.160596	0.114312	-0.00816037	0.00133519	0.000604578	2.63556e-05	0.00354466	0.103724	0.532408	5.21693e-05	4.2267e-05	0.021248	0.306779	0.819748	0.00082546
A5.2440	A5	1	[25889411 25890032]	[25889411 25889800]	-	AT1G68872_and_AT1G68862	0.189195	0.224714	0.188556	0.000772677	3.99065e-05	3.00845e-05	6.50015e-09	2.06836e-06	0.879163	0.985308	0.842525	1.19959e-08	2.76989e-05	0.957215	1	0.938091
A5.2442	A5	1	[25890326 25890921]	[25890326 25891169]	-	AT1G68872_and_AT1G68862	0.0162147	0.795241	0.0713218	0.00523378	-0.00298481	5.63915e-05	1.77754e-64	0.112428	0.357459	0.212198	0.730429	5.73407e-64	0.306139	0.622292	0.552794	0.877103
A5.2441	A5	1	[25890326 25891219]	[25890326 25891169]	-	AT1G68872_and_AT1G68862	0.0292501	0.771778	0.0304842	0.00926944	9.82991e-05	-0.000145855	4.21257e-33	0.633576	0.254934	0.977275	0.541498	1.13112e-32	0.835091	0.521836	1	0.753949
A5.718	A5	1	[25899208 25899326]	[25899191 25899326]	+	AT1G68890	0.0339227	0.214811	0.0660618	0.00135024	-0.00200869	-8.18998e-05	3.07619e-12	0.0365584	0.738387	0.24392	0.496562	6.20106e-12	0.138151	0.887981	0.591496	0.721159
A5.716	A5	1	[25900373 25900475]	[25900378 25900475]	+	AT1G68890	0.116738	0.107203	0.0555067	-0.000396599	0.00382699	7.29697e-05	0.00027845	0.0666	0.918406	0.0204339	0.527006	0.000421564	0.213134	0.973948	0.149292	0.743355
A5.715	A5	1	[25902384 25902753]	[25902496 25902753]	+	AT1G68890	0.0131844	0.983863	0.00934439	-0.0013202	0.000239999	-3.03827e-06	0	0.448021	0.402125	0.720944	0.948403	0	0.709239	0.661372	0.911964	0.987837
A5.717	A5	1	[25904599 25904850]	[25904627 25904850]	+	AT1G68890	0.201111	-0.00372489	0.146347	0.00580615	0.00342278	-0.000183606	0.864844	7.09769e-11	0.0432413	0.00519659	0.0319276	0.887175	1.79307e-09	0.173629	0.0581932	0.135002
A5.2012	A5	1	[25908380 25908568]	[25908380 25908564]	-	AT1G68910	0.146274	0.805136	0.146915	-0.00453948	-4.00554e-05	7.93222e-05	0	8.58537e-12	0.0991261	0.972777	0.333481	0	2.38741e-10	0.298028	1	0.586113
A5.2013	A5	1	[25939070 25939201]	[25939070 25939180]	-	AT1G68990	0.00514074	0.000502813	-0.00160638	5.6504e-05	0.000421695	-1.74828e-06	0.871957	0.615727	0.890248	0.0157273	0.886058	0.893723	0.823567	0.962102	0.125642	0.957947
A5.720	A5	1	[25943424 25943512]	[25943429 25943512]	+	AT1G69010	0.0272789	0.843859	0.0560297	0.000351833	-0.00179693	0.00010741	0	0.000757603	0.868713	0.04772	0.090341	0	0.00567584	0.952699	0.253435	0.272441
A5.2014	A5	1	[25945961 25946098]	[25945961 25946054]	-	AT1G69020	0.279992	0.59749	0.280202	0.0139569	-0.000123993	-0.000508491	2.88153e-21	1.37288e-05	0.0950927	0.972381	0.0416508	6.82871e-21	0.000157466	0.291068	1	0.16171
A5.2015	A5	1	[25946199 25946438]	[25946199 25946290]	-	AT1G69020	0.000206234	0.939633	-0.0579741	0.00433056	0.00360552	-0.000269142	4.69199e-67	0.29584	0.547304	0.24205	0.210259	1.52811e-66	0.568648	0.771181	0.589124	0.456705
A5.2016	A5	1	[25970421 25970509]	[25970421 25970514]	-	AT1G69070	0.0179019	0.00784965	0.0118802	0.000984184	0.000376355	-3.84343e-05	0.383675	0.198732	0.405325	0.455496	0.275422	0.42691	0.445998	0.664407	0.769628	0.534143
A5.2017	A5	1	[25972425 25972777]	[25972425 25972819]	-	AT1G69080	0.0312374	-0.0048861	0.0215887	0.00909809	0.000603048	-0.000220493	0.852981	0.424794	0.00856416	0.682784	0.0324884	0.876473	0.690427	0.0537922	0.894536	0.136481
A5.2449	A5	1	[26021490 26021834]	[26021490 26021830]	-	AT1G69210_and_AT1G69230_and_AT1G69220	0.0169001	0.0203557	-0.012242	-0.00102949	0.00182138	1.63331e-05	0.00499441	0.0998153	0.279365	7.17887e-06	0.56462	0.00690298	0.282379	0.548519	0.000265511	0.771159
A5.2448	A5	1	[26022929 26023490]	[26022929 26023494]	-	AT1G69210_and_AT1G69230_and_AT1G69220	0.0247174	0.930539	0.0179912	0.000256756	0.000420384	-6.41912e-05	0	0.0677135	0.838524	0.433933	0.0872876	0	0.215956	0.938607	0.755272	0.266166
A5.2447	A5	1	[26025196 26025434]	[26025196 26025353]	-	AT1G69210_and_AT1G69230_and_AT1G69220	0.000902748	0.999624	0.000490052	-6.07738e-05	2.57935e-05	3.77327e-07	0	0.586022	0.597572	0.599277	0.912409	0	0.804593	0.805063	0.855868	0.971181
A5.2451	A5	1	[26046672 26046782]	[26046672 26046788]	-	AT1G69280_and_AT1G69290	0.445603	0.00929915	0.310697	0.0276465	0.00843166	-0.000623177	0.927565	0.00306921	0.0394792	0.140805	0.119285	0.945	0.0187679	0.162648	0.460696	0.325064
A5.2018	A5	1	[26051565 26051791]	[26051565 26052554]	-	AT1G69295	0.0186616	0.55391	0.0247756	0.00327973	-0.000382126	-4.22248e-05	4.36416e-85	0.394079	0.377889	0.809599	0.703192	1.51169e-84	0.663138	0.640523	0.949639	0.861806
A5.721	A5	1	[26067947 26068027]	[26067801 26068027]	+	AT1G69340	0.00713489	0.986542	0.00967349	-0.00101118	-0.000158663	4.26811e-05	0	0.000570967	0.00488284	0.300317	6.68218e-05	0	0.00444396	0.0351843	0.651058	0.0010189
A5.2019	A5	1	[26075422 26076093]	[26075422 26075924]	-	AT1G69360	0.0634721	0.672247	0.155879	0.0196853	-0.00577546	-0.00028354	1.55384e-144	7.20536e-09	1.122e-08	8.50789e-05	0.00576513	6.16203e-144	1.41032e-07	5.08309e-07	0.00217513	0.0383831
A5.722	A5	1	[26081056 26081140]	[26081012 26081140]	+	AT1G69370	0.0221418	0.149831	0.0580499	-0.0107357	-0.00224425	0.00021178	3.71324e-24	0.000128661	3.11566e-08	0.00665805	0.000247904	9.13147e-24	0.00119743	1.27099e-06	0.0694946	0.00307022
A5.2020	A5	1	[26107618 26107699]	[26107618 26107894]	-	AT1G69450	0.00330704	0.098036	-0.013685	-0.00438146	0.001062	3.34247e-05	5.53095e-28	0.135646	0.000188364	0.0337832	0.339042	1.41818e-27	0.348255	0.00253734	0.204728	0.591944
A5.2021	A5	1	[26115679 26115774]	[26115679 26115811]	-	AT1G69480	0.0173558	0.0253208	-0.0260551	-0.00251291	0.00303288	8.84117e-05	0.29966	0.286733	0.467623	0.0296874	0.404376	0.340028	0.558577	0.71457	0.188546	0.650678
A5.2025	A5	1	[26177250 26178087]	[26177250 26179204]	-	AT1G69587	0.0011807	0.98015	0.00560016	0.000866236	-0.000276216	-2.12742e-05	0	0.216363	0.135011	0.263693	0.217964	0	0.471199	0.359797	0.613493	0.466474
A5.2022	A5	1	[26177250 26179204]	[26177250 26179104]	-	AT1G69587	0.0174236	0.0277009	0.00159121	0.000145433	0.000989526	-2.15891e-05	0.0165748	0.893277	0.923648	0.126195	0.633017	0.0218519	0.969123	0.976198	0.43626	0.817885
A5.2024	A5	1	[26177250 26179204]	[26177250 26179108]	-	AT1G69587	0.00564577	0.0357012	-0.00415224	-0.00044981	0.000612376	-3.87835e-06	0.00649913	0.757677	0.79391	0.404239	0.939741	0.00889813	0.904649	0.917124	0.732858	0.983896
A5.1156	A5	1	[26190156 26190796]	[26190154 26190796]	+	AT1G69620_and_AT1G09083_and_AT1G09087	0.121886	0.0106404	0.125567	0.00208217	-0.000230118	-5.81549e-05	0.00911923	1.14176e-197	0.000101262	0.313643	0.000268313	0.0123213	2.83632e-194	0.00151082	0.663469	0.00328207
A5.723	A5	1	[26205369 26205436]	[26205337 26205436]	+	AT1G69680	0.100127	0.913072	0.0730691	0.000501929	0.00169114	-8.9013e-05	0	0.000125004	0.836821	0.103643	0.220248	0	0.00116704	0.937914	0.391881	0.469334
A5.1157	A5	1	[26232107 26232192]	[26231936 26232192]	+	AT1G69740_and_AT1G69750	0.0285269	0.910101	0.0317121	-0.00403938	-0.000199073	0.000152767	0	5.15768e-06	5.67508e-06	0.599921	8.40025e-09	0	6.41428e-05	0.000128357	0.856071	3.56711e-07
A5.724	A5	1	[26267643 26267737]	[26267639 26267737]	+	AT1G69790	0.022918	0.955931	-0.0143572	0.00463467	0.00178766	-0.000158388	0	0.612344	0.0686298	0.174579	0.0378322	0	0.821511	0.235915	0.503115	0.151217
A5.2028	A5	1	[26295159 26295589]	[26295159 26295447]	-	AT1G69840	0.0195144	0.0973805	-0.0351615	-0.00206009	0.00341725	6.51872e-05	4.89018e-05	0.152935	0.512789	0.010892	0.487006	7.71712e-05	0.376941	0.747852	0.0977982	0.713188
A5.2029	A5	1	[26295159 26295589]	[26295159 26295702]	-	AT1G69840	0.0820589	0.597546	0.0707528	0.00718277	0.000706627	-0.000538598	8.21804e-106	0.0116836	0.045413	0.644353	4.77131e-07	3.01254e-105	0.0566415	0.179354	0.879242	1.35074e-05
A5.726	A5	1	[26426824 26426990]	[26426509 26426990]	+	AT1G70180	0.305631	0.383288	0.279919	-0.00848555	0.000237951	-2.35521e-05	4.94464e-06	0.00114119	0.457308	0.963504	0.945192	8.19206e-06	0.00809396	0.705974	1	0.986699
A5.727	A5	1	[26426824 26426990]	[26426835 26426990]	+	AT1G70180	0.0065426	0.0162504	0.012439	-0.00062975	-0.000368523	4.90847e-06	0.00134723	0.0167618	0.343902	0.193962	0.80445	0.00195155	0.0756045	0.61113	0.529586	0.917249
A5.728	A5	1	[26454797 26454910]	[26454814 26454910]	+	AT1G70250	0.0643143	0.731295	0.167283	-0.00447289	-0.00669213	0.000330561	3.57433e-33	0.00779927	0.576714	0.0547695	0.170538	9.60521e-33	0.0406896	0.791024	0.273618	0.40175
A5.729	A5	1	[26454835 26454910]	[26454814 26454910]	+	AT1G70250	0.123416	0.996241	-0.0176779	-0.00694115	0.00912866	-6.89466e-05	1.15753e-126	0.680501	0.204583	0.000124499	0.675485	4.4358e-126	0.863619	0.459718	0.00302471	0.846166
A5.2031	A5	1	[26479936 26480445]	[26479936 26480447]	-	AT1G70300	0.014449	4.97721e-05	-0.000123807	-0.000172129	0.000910798	1.53373e-05	0.99261	0.982082	0.807194	0.00245796	0.465502	1	1	0.923071	0.0335955	0.69723
A5.2032	A5	1	[26536517 26536603]	[26536517 26537403]	-	AT1G70410	0.099939	0.875301	0.0798926	-0.00531255	0.0012529	-2.45918e-05	0	6.61386e-08	0.00499604	0.1205	0.662738	0	1.13245e-06	0.0357838	0.424246	0.837483
A5.732	A5	1	[26546412 26546496]	[26546408 26546496]	+	AT1G70430	0.00746378	0.998526	0.0119462	-0.00157165	-0.000383683	6.01762e-05	0	0.351687	0.323409	0.639941	0.262018	0	0.625301	0.593465	0.877119	0.5193
A5.731	A5	1	[26547353 26547424]	[26547347 26547424]	+	AT1G70430	0.0559746	0.724541	0.0574953	0.0156228	-0.000929512	-0.000340268	9.37516e-101	0.132428	0.000984449	0.703646	0.0332584	3.39249e-100	0.342256	0.0100398	0.904346	0.138533
A5.2039	A5	1	[26565161 26565290]	[26565161 26565685]	-	AT1G70490	4.77324e-05	0.99955	0.000560731	1.13781e-05	-3.20624e-05	2.27918e-07	0	0.00376617	0.645889	0.00239326	0.757394	0	0.0223778	0.835816	0.0329823	0.892672
A5.2040	A5	1	[26565161 26565689]	[26565161 26565290]	-	AT1G70490	0.00540872	0.0106281	-0.0155254	-0.000699591	0.00135502	1.15841e-05	0.311573	0.147691	0.615137	0.0229882	0.780354	0.3527	0.368455	0.81724	0.160788	0.905104
A5.2036	A5	1	[26565161 26565685]	[26565161 26565301]	-	AT1G70490	0.000786302	0.000487423	0.0012404	-1.77748e-05	-2.8381e-05	1.37335e-06	0.265772	0.00577121	0.757179	0.246955	0.422694	0.304075	0.0318887	0.898989	0.594551	0.664987
A5.2037	A5	1	[26565161 26565689]	[26565161 26565301]	-	AT1G70490	0.0472205	0.0225736	0.0248294	-0.00372688	0.00139945	0.000172959	0.334821	0.301114	0.225079	0.285377	0.058822	0.37687	0.573634	0.486344	0.636235	0.205711
A5.2034	A5	1	[26565161 26565317]	[26565161 26565685]	-	AT1G70490	0.000152382	1.00025	3.79866e-05	-6.62126e-05	7.14972e-06	1.7278e-06	0	0.876834	0.0347327	0.592855	0.0644297	0	0.962933	0.148762	0.852787	0.218159
A5.2035	A5	1	[26565161 26565317]	[26565161 26565689]	-	AT1G70490	0.00327268	1.00719	-0.000926137	-0.0016342	0.000255138	3.80852e-05	0	0.9064	0.109834	0.55999	0.211953	0	0.973392	0.317749	0.835716	0.458371
A5.2033	A5	1	[26565161 26565689]	[26565161 26565685]	-	AT1G70490	0.0160148	0.942529	0.027753	-0.000175937	-0.000733639	5.55902e-05	0	7.43725e-13	0.722347	0.000511228	0.000164557	0	2.28091e-11	0.878756	0.00975988	0.00218584
A5.735	A5	1	[26571205 26571285]	[26571179 26571285]	+	AT1G70505	0.00935016	0.651511	-0.190081	0.00604557	0.0121505	-0.000482972	4.58578e-12	0.0428328	0.614874	0.0158938	0.173232	9.21049e-12	0.155202	0.817109	0.126345	0.405564
A5.739	A5	1	[26583893 26584247]	[26583781 26584247]	+	AT1G70518	0.0217366	0.605322	-0.0926408	0.0124741	0.00714858	-8.59965e-05	2.57011e-07	0.442098	0.418539	0.276938	0.851525	4.4946e-07	0.704608	0.675436	0.629034	0.942251
A5.738	A5	1	[26583895 26584247]	[26583781 26584247]	+	AT1G70518	0.00703325	0.417965	0.10587	0.0106012	-0.00617729	-8.29895e-05	3.91744e-05	0.309943	0.426809	0.277504	0.834617	6.2229e-05	0.583037	0.68305	0.629509	0.934065
A5.737	A5	1	[26583893 26584247]	[26583895 26584247]	+	AT1G70518	0.0330755	0.667304	-0.156364	-0.00113774	0.0118399	0.000191698	0.000561521	0.430756	0.964259	0.274136	0.799968	0.000834859	0.694813	0.993589	0.625304	0.915434
A5.2043	A5	1	[26589312 26589401]	[26589312 26589408]	-	AT1G70530	0.0941108	0.00782137	0.0395391	-0.000483745	0.00341073	3.39778e-05	0.445886	0.000172438	0.719443	2.8585e-09	0.397125	0.490619	0.00155204	0.876858	2.45567e-07	0.645033
A5.2044	A5	1	[26590431 26590511]	[26590431 26590520]	-	AT1G70530	0.0231398	0.0396086	0.0408786	-0.00273341	-0.00110867	5.97689e-05	1.09546e-13	7.80912e-14	9.38768e-05	0.00020291	0.00415162	2.27646e-13	2.67593e-12	0.00142198	0.0045998	0.0295724
A5.741	A5	1	[26610293 26610415]	[26610326 26610415]	+	AT1G70570	0.118732	0.0465207	0.0166627	-0.00318379	0.00637932	0.000205452	0.00192895	0.278959	0.105904	3.0114e-14	0.000462135	0.0027616	0.5502	0.311246	5.61061e-12	0.00515771
A5.740	A5	1	[26611053 26611127]	[26610942 26611127]	+	AT1G70570	0.000417682	0.99619	0.00122825	0.000264945	-5.06603e-05	-6.80789e-06	0	0.260824	0.057984	0.395248	0.102063	0	0.529829	0.212002	0.727236	0.294246
A5.742	A5	1	[26612760 26613169]	[26612791 26613169]	+	AT1G70580	0.026271	0.970862	0.0172789	-0.000130588	0.000562007	-2.84198e-05	0	0.00632595	0.871867	0.103552	0.238776	0	0.0342991	0.954005	0.391823	0.49123
A5.743	A5	1	[26612974 26613169]	[26612791 26613169]	+	AT1G70580	0.0179321	0.962249	0.0268547	0.00012296	-0.000557665	1.05998e-05	0	0.00399955	0.91796	0.273265	0.765695	0	0.0235231	0.973718	0.624407	0.896955
A5.1159	A5	1	[26622797 26622940]	[26622786 26622940]	+	AT1G70610_and_AT1G70620	0.0106874	0.979222	-0.0235258	-0.00135968	0.00213833	-8.55048e-05	0	0.0867749	0.43913	0.00432474	0.102496	0	0.25628	0.692985	0.0509567	0.295039
A5.1161	A5	1	[26624467 26624699]	[26624472 26624699]	+	AT1G70610_and_AT1G70620	0.0651572	0.00659268	0.0684739	-0.000767149	-0.000207294	4.57352e-05	0.549217	1.33023e-09	0.59543	0.736504	0.288043	0.590307	2.87766e-08	0.803994	0.919594	0.547823
A5.1163	A5	1	[26627540 26627841]	[26627512 26627841]	+	AT1G70610_and_AT1G70620	0.0390127	0.333964	0.0503382	-0.00611079	-0.000707846	0.000113455	3.02296e-10	0.354825	0.379985	0.811497	0.584341	5.79589e-10	0.628295	0.642598	0.950208	0.784005
A5.1162	A5	1	[26627540 26627844]	[26627512 26627844]	+	AT1G70610_and_AT1G70620	0.194723	0.180872	0.316375	-0.0066402	-0.00760319	0.000111584	6.76457e-06	1.66492e-14	0.208058	0.000723242	0.477697	1.11441e-05	6.18074e-13	0.463959	0.0129256	0.706849
A5.1160	A5	1	[26630582 26630700]	[26630303 26630700]	+	AT1G70610_and_AT1G70620	0.0149668	0.0427101	0.00934679	-0.00498087	0.000351249	0.000274855	0.0243858	0.6311	0.0454984	0.740819	0.000212175	0.031624	0.833397	0.179548	0.92186	0.00270065
A5.1166	A5	1	[26641098 26641431]	[26641075 26641431]	+	AT1G70640_and_AT1G70650_and_AT1G70660	0.0202384	0.0204468	0.00645557	-0.00128834	0.000861425	5.7594e-05	2.21978e-16	0.0115195	8.1137e-05	6.41661e-10	3.36095e-09	4.88063e-16	0.0559823	0.00125646	6.31284e-08	1.54853e-07
A5.2046	A5	1	[26674293 26674410]	[26674293 26674374]	-	AT1G70740	0.00201825	0.000265945	0.000190969	0.000402719	0.000114205	-1.42573e-05	0.942267	0.959572	0.403425	0.578433	0.320835	0.958388	0.993781	0.662731	0.844587	0.576636
A5.2045	A5	1	[26674932 26675031]	[26674932 26675041]	-	AT1G70740	0.106708	0.0372107	-0.0451975	-0.00707279	0.00949407	0.000246313	0.180042	0.112452	0.0522097	9.86097e-10	0.0232611	0.21111	0.306139	0.197534	9.27305e-08	0.107025
A5.2048	A5	1	[26710480 26710567]	[26710480 26710563]	-	AT1G70830	0.000213946	0.000663349	0.000604821	-5.90302e-05	-2.44297e-05	1.76104e-06	0.24831	0.304876	0.433802	0.447456	0.433227	0.285432	0.577589	0.688621	0.763886	0.674316
A5.2047	A5	1	[26711053 26711151]	[26711053 26711147]	-	AT1G70830	0.000231968	0.00118981	0.000632637	-9.37371e-05	-2.50418e-05	2.69106e-06	0.0143354	0.204384	0.141612	0.357119	0.15672	0.0190215	0.453894	0.371244	0.699042	0.38178
A5.2049	A5	1	[26715706 26715932]	[26715706 26715928]	-	AT1G70850	0.000155758	0.00108795	0.000270209	-2.86784e-05	-7.15316e-06	6.81512e-07	3.89978e-06	0.263708	0.353841	0.587575	0.45962	6.49383e-06	0.533301	0.619124	0.849797	0.693366
A5.1167	A5	1	[26763215 26763503]	[26763418 26763503]	+	AT1G70980_and_AT1G71010	0.0309642	0.660449	0.0306191	0.0124608	2.15697e-05	-0.000334321	8.385877742941e-310	0.0890745	6.36025e-08	0.982483	1.11584e-06	0	0.260887	2.39695e-06	1	2.89068e-05
A5.745	A5	1	[26819622 26819724]	[26819616 26819724]	+	AT1G71110	0.106716	0.0492154	0.123248	-0.00272464	-0.00103327	3.6722e-05	0.130908	0.000226665	0.524046	0.570959	0.773198	0.156363	0.00196994	0.755648	0.84071	0.901127
A5.2054	A5	1	[26921565 26921661]	[26921565 26921664]	-	AT1G71440	0.0220286	0.973468	0.0268618	-0.000461022	-0.00030208	2.73636e-05	0	0.000159279	0.612471	0.436332	0.312942	0	0.0014498	0.815406	0.756312	0.568206
A5.2057	A5	1	[26976096 26976292]	[26976096 26976272]	-	AT1G71710	0.0708868	0.149235	0.0933089	-0.00565411	-0.00140138	0.000162979	3.90952e-12	2.33755e-05	0.0451363	0.244224	0.0526102	7.86388e-12	0.00025628	0.178568	0.591831	0.19063
A5.746	A5	1	[26984573 26984691]	[26984577 26984691]	+	AT1G71720	0.173931	0.744156	0.182832	0.00417997	-0.00055627	-0.000133013	0	3.94705e-75	0.00104806	0.306382	0.000465042	0	1.52807e-72	0.0105657	0.657119	0.00518628
A5.747	A5	1	[26984941 26985026]	[26984915 26985026]	+	AT1G71720	0.0475568	0.836328	0.0675756	-0.00858802	-0.00125118	0.00023061	0	6.29876e-05	7.04918e-05	0.174461	0.000340946	0	0.00063051	0.00111124	0.502912	0.00401565
A5.1169	A5	1	[26997408 26997655]	[26997413 26997655]	+	AT1G71790_and_AT1G71800	0.274266	-0.0151331	0.199082	0.0079052	0.004699	-0.000216287	0.462046	4.0517e-21	0.0034212	4.49384e-05	0.00719159	0.506401	2.44002e-19	0.0267891	0.00126737	0.0454101
A5.2059	A5	1	[27002943 27003019]	[27002943 27003010]	-	AT1G71810	0.384387	0.0565519	0.425397	0.00878884	-0.00256318	-0.000341517	0.0469857	4.67648e-48	0.0186716	0.107686	0.00215942	0.0591688	8.99393e-46	0.0963612	0.399767	0.0176121
A5.2061	A5	1	[27004735 27004836]	[27004735 27004808]	-	AT1G71810	0.0356558	0.011941	-0.00841094	-0.00278206	0.00275417	0.000210004	0.602542	0.720686	0.355303	0.031868	0.0191924	0.642111	0.886361	0.620535	0.197256	0.0935766
A5.2060	A5	1	[27005875 27006091]	[27005875 27006076]	-	AT1G71810	0.229547	0.104711	0.193918	-0.00607655	0.00222677	0.000280324	0.000398558	1.63463e-10	0.117442	0.178468	0.0153513	0.000598087	3.90763e-09	0.330894	0.50784	0.0797169
A5.749	A5	1	[27011959 27012354]	[27012028 27012354]	+	AT1G71820	0.000256328	0.000868509	0.000340393	-0.000106908	-5.25403e-06	3.88969e-06	0.0975637	0.526768	0.120242	0.857874	0.0577877	0.1184	0.763354	0.334855	0.964409	0.203239
A5.750	A5	1	[27014294 27014635]	[27014228 27014635]	+	AT1G71820	0.000256328	0.000868509	0.000340393	-0.000106908	-5.25403e-06	3.88969e-06	0.0975637	0.526768	0.120242	0.857874	0.0577877	0.1184	0.763354	0.334855	0.964409	0.203239
A5.751	A5	1	[27063797 27063958]	[27063626 27063958]	+	AT1G71900	0.00160018	0.998203	0.00330997	-0.000328932	-0.000106862	1.00682e-05	0	0.0839094	0.179423	0.306368	0.167843	0	0.25051	0.426285	0.657119	0.397915
A5.1170	A5	1	[27099190 27099291]	[27099194 27099291]	+	AT1G71980_and_AT1G71990	0.0667301	-0.00312341	0.0402792	0.000736107	0.00165318	-2.33479e-05	0.652489	1.50929e-08	0.418777	2.05731e-05	0.389397	0.690378	2.81904e-07	0.675637	0.000654519	0.638324
A5.1171	A5	1	[27099190 27099291]	[27099201 27099291]	+	AT1G71980_and_AT1G71990	0.310618	0.00314183	0.234251	0.0011949	0.00477294	-2.81853e-05	0.785801	7.84618e-87	0.431012	1.62166e-13	0.53302	0.814809	4.03267e-84	0.686056	2.74669e-11	0.748121
A5.2453	A5	1	[27168428 27168523]	[27168428 27168531]	-	AT1G72190_and_AT1G72200	0.141537	0.0785341	0.172112	-0.00192007	-0.00191089	3.20563e-05	0.0142651	1.65106e-07	0.648061	0.286709	0.798131	0.0189359	2.66765e-06	0.837162	0.637773	0.914527
A5.752	A5	1	[27193940 27194025]	[27193904 27194025]	+	AT1G72250	0.00269062	0.00345948	0.0052218	-0.000628997	-0.000165733	1.96561e-05	0.380199	0.194542	0.22849	0.458774	0.207454	0.423358	0.439841	0.490833	0.772124	0.452723
A5.1173	A5	1	[27235003 27235097]	[27235042 27235097]	+	AT1G72330_and_AT1G72340	0.00134131	0.00124286	0.00376986	-0.000168317	-0.000151784	4.68261e-06	0.27404	0.00122071	0.259079	0.016997	0.291998	0.312897	0.00860471	0.526292	0.131914	0.55199
A5.753	A5	1	[27246836 27246922]	[27246845 27246922]	+	AT1G72390	0.00816606	0.00608916	0.00309764	-0.0011409	0.000316776	5.09114e-05	0.435449	0.698955	0.265578	0.46849	0.095444	0.48011	0.873918	0.532549	0.777571	0.282216
A5.2062	A5	1	[27261929 27262045]	[27261929 27262032]	-	AT1G72420	0.0920163	0.157571	0.142276	-0.00438943	-0.00314124	4.3418e-05	1.50646e-07	3.79549e-06	0.265021	0.0613921	0.711366	2.65867e-07	4.84526e-05	0.532005	0.293992	0.866106
A5.1174	A5	1	[27315946 27316040]	[27315900 27316040]	+	AT1G72530_and_AT1G72545	0.216215	0.277013	0.260511	-0.00460765	-0.00276847	0.000304909	1.94982e-05	9.04885e-05	0.588378	0.445708	0.229383	3.14626e-05	0.000875515	0.799371	0.76263	0.480595
A5.2065	A5	1	[27324871 27324982]	[27324871 27324957]	-	AT1G72560	0.152014	0.226112	0.267832	0.00758707	-0.00723865	-0.000514596	7.9498e-11	6.062e-14	0.0964977	0.000200088	0.000154664	1.54871e-10	2.1185e-12	0.293142	0.00454274	0.00207681
A5.2066	A5	1	[27324871 27324957]	[27324871 27324991]	-	AT1G72560	0.00828279	0.654272	-0.118643	-0.0185258	0.00820029	0.000824681	1.72762e-47	0.0109143	0.00193081	0.00174789	4.64781e-06	5.12391e-47	0.0536892	0.0172245	0.0257434	0.000100254
A5.2064	A5	1	[27324871 27324982]	[27324871 27324991]	-	AT1G72560	0.204028	0.352506	0.144662	-0.00560738	0.00371034	-4.20797e-05	2.64873e-16	0.00105469	0.321017	0.123571	0.802635	5.80963e-16	0.00757778	0.591206	0.431163	0.916551
A5.1177	A5	1	[27351264 27351417]	[27351246 27351417]	+	AT1G72650_and_AT1G72660	0.0410858	0.566354	0.0658422	0.00862065	-0.00154728	0.000112378	1.95246e-69	0.0459393	0.0410966	0.389915	0.371514	6.41635e-69	0.163223	0.167408	0.72378	0.622381
A5.754	A5	1	[27366550 27366823]	[27366284 27366823]	+	AT1G72700	0.00309478	0.982012	0.00905068	0.000952324	-0.000372244	-2.33214e-05	0	0.00593209	0.0236426	0.0380447	0.0629056	0	0.0325904	0.11362	0.219449	0.214801
A5.756	A5	1	[27375721 27375902]	[27375753 27375902]	+	AT1G72710	0.030677	0.0092379	0.0189854	7.5051e-05	0.000730727	-4.16957e-06	0.000505545	3.23702e-12	0.829561	8.86368e-07	0.688142	0.000753704	9.36851e-11	0.934306	4.24393e-05	0.853461
A5.2455	A5	1	[27380901 27381146]	[27380901 27381164]	-	AT1G72730_and_AT1G72740	0.168581	0.477782	0.20939	0.00714272	-0.00255051	7.60214e-05	2.78094e-110	1.54639e-21	0.0110416	0.0333197	0.363986	1.02866e-109	9.56389e-20	0.0651135	0.203192	0.615556
A5.2068	A5	1	[27406085 27406169]	[27406085 27406172]	-	AT1G72830	0.000775466	1.0001	0.000589456	-0.000137596	1.16256e-05	3.93657e-06	0	0.449952	0.168081	0.784755	0.18566	0	0.710852	0.409889	0.940813	0.42341
A5.2067	A5	1	[27407130 27407586]	[27407130 27407281]	-	AT1G72830	0						1	1	1	1	1	1	1	1	1	1
A5.2070	A5	1	[27423776 27423945]	[27423776 27423937]	-	AT1G72880	0.0566555	-0.000226003	0.0279398	0.000456994	0.00179473	-1.4133e-05	0.978414	0.00111196	0.676797	0.00012345	0.665268	0.990845	0.00791488	0.854887	0.00300902	0.839541
A5.2069	A5	1	[27425981 27426113]	[27425981 27426074]	-	AT1G72880	0.0814178	0.854471	0.0959501	-0.00111642	-0.000908269	5.98672e-05	2.56463e-137	0.00633055	0.80391	0.635697	0.654981	1.00422e-136	0.0343078	0.921714	0.874893	0.832609
A5.1180	A5	1	[27439930 27440071]	[27439973 27440071]	+	AT1G72920_and_AT1G72930	0.147909	0.0755222	0.061492	-0.00997563	0.00540106	0.000347199	0.0125255	0.0475039	0.0119762	0.0014193	0.00333241	0.0167242	0.167308	0.0692018	0.0219804	0.0248268
A5.757	A5	1	[27453720 27454128]	[27453724 27454128]	+	AT1G72970	0.0403168	0.0162019	0.00910597	-0.00284061	0.00195068	8.81762e-05	0.186514	0.469264	0.0776497	0.00448768	0.0660251	0.218278	0.726412	0.254423	0.0522978	0.221545
A5.1181	A5	1	[27489560 27489684]	[27489574 27489684]	+	AT1G73060_and_AT1G73066_and_AT1G73080_and_AT1G73090	0.163697	0.125816	0.179509	0.000340032	-0.000988253	-3.80881e-05	2.97935e-12	2.85588e-22	0.885742	0.327371	0.589057	6.00787e-12	1.83478e-20	0.95996	0.675021	0.78707
A5.2071	A5	1	[27495559 27495688]	[27495559 27495644]	-	AT1G73110	0.00602293	0.00732095	-0.00496623	-0.00100516	0.000686822	3.08603e-05	0.00164942	0.0374415	0.000994992	1.32581e-07	0.000693697	0.00237418	0.140606	0.0101231	7.71923e-06	0.00714305
A5.2073	A5	1	[27495959 27496138]	[27495959 27496043]	-	AT1G73110	0.0534667	0.04395	0.108954	0.00130816	-0.00346794	-9.64154e-05	3.79253e-05	2.39256e-23	0.350178	6.31033e-09	0.0208357	6.03026e-05	1.66252e-21	0.615453	5.08408e-07	0.0994096
A5.2072	A5	1	[27495959 27496138]	[27495959 27496064]	-	AT1G73110	0.012613	0.0399141	0.0176851	-0.00167466	-0.000317004	2.05333e-05	4.26152e-09	0.0111866	0.0604404	0.404552	0.439738	7.90517e-09	0.0547754	0.217535	0.732951	0.679363
A5.2075	A5	1	[27496390 27496501]	[27496390 27496496]	-	AT1G73110	0.0308643	0.00303002	0.0316878	-0.000157896	-5.14696e-05	2.58655e-06	0.623227	5.49665e-07	0.845356	0.881468	0.914603	0.662001	8.19276e-06	0.941371	0.973829	0.972212
A5.2076	A5	1	[27514268 27514350]	[27514268 27514354]	-	AT1G73170	0.158354	0.726738	0.0782071	-0.0177474	0.00500916	0.00030078	8.40231e-129	0.0113169	7.04553e-06	0.0029433	0.0106116	3.23818e-128	0.055268	0.000153305	0.0384823	0.0607631
A5.2077	A5	1	[27517388 27517799]	[27517388 27517714]	-	AT1G73177	0.000327802	0.00976197	0.000396371	-0.000283121	-4.28558e-06	7.55525e-06	0.0188125	0.92592	0.603698	0.985298	0.641998	0.0246668	0.979674	0.809255	1	0.824059
A5.758	A5	1	[27518802 27518916]	[27518810 27518916]	+	AT1G73180	0.00408881	0.00034554	-0.00121546	-0.000125219	0.000331517	7.83516e-06	0.873688	0.585691	0.66072	0.00642571	0.356662	0.895313	0.804334	0.844925	0.0675663	0.608906
A5.2079	A5	1	[27524599 27524721]	[27524599 27524691]	-	AT1G73200	0.0134216	0.00974114	0.0172292	0.000194866	-0.000237977	-1.8096e-05	0.0536206	0.000877104	0.768657	0.399559	0.359291	0.0671017	0.00644637	0.904498	0.729525	0.611363
A5.2078	A5	1	[27524599 27524721]	[27524599 27524712]	-	AT1G73200	0.0474536	0.00725534	0.0544161	0.000102363	-0.000435152	-1.40375e-05	0.158117	5.80034e-25	0.879412	0.130395	0.485008	0.186813	4.38853e-23	0.95732	0.443225	0.712046
A5.2461	A5	1	[27562895 27563011]	[27562895 27563152]	-	AT1G73290_and_AT1G73300_and_AT1G73320_and_AT1G73310	0.153041	0.407618	0.212006	-0.0163517	-0.00372581	0.000342823	1.96642e-06	0.0149462	0.152294	0.434963	0.312663	3.32194e-06	0.0689381	0.387066	0.755518	0.568068
A5.2082	A5	1	[27594166 27594494]	[27594166 27594272]	-	AT1G73390	0.00747284	0.0137815	0.0175114	-0.000605195	-0.000627408	1.37363e-05	0.0844251	0.0325792	0.563725	0.16043	0.660096	0.103284	0.126555	0.782483	0.490473	0.83588
A5.2083	A5	1	[27594166 27594272]	[27594166 27594498]	-	AT1G73390	0.00728347	0.926956	-0.00132012	0.00325005	0.000537725	-5.88534e-05	0	0.952169	0.2484	0.654249	0.482993	0	0.990177	0.51425	0.88342	0.710658
A5.2081	A5	1	[27594166 27594494]	[27594166 27594498]	-	AT1G73390	0.134963	0.17118	0.156831	-0.000970645	-0.00136678	7.87231e-05	2.05324e-08	5.50775e-07	0.80859	0.423728	0.509643	3.73283e-08	8.20109e-06	0.923794	0.747015	0.731392
A5.2085	A5	1	[27594551 27594740]	[27594551 27594961]	-	AT1G73390	0.0385276	0.927154	0.0519742	-0.00206368	-0.000840412	0.00011597	0	0.000119079	0.232396	0.25406	0.0243022	0	0.00112121	0.495132	0.602829	0.110687
A5.2084	A5	1	[27594551 27594961]	[27594551 27594764]	-	AT1G73390	0.00349112	0.00929984	0.00876174	-0.000793423	-0.000329414	1.97311e-05	0.0591278	0.0830674	0.219933	0.232312	0.30591	0.073595	0.248893	0.479745	0.577459	0.563876
A5.759	A5	1	[27601972 27602083]	[27601991 27602083]	+	AT1G73410	0.034914	-0.00506116	-0.0120593	0.000920211	0.00301481	-2.87566e-05	0.868716	0.697871	0.820707	0.0765999	0.812504	0.890676	0.872884	0.930039	0.331751	0.922063
A5.2462	A5	1	[27692826 27692925]	[27692826 27692914]	-	AT1G73650_and_AT1G73655_and_AT1G73660	0.0446491	0.00810175	0.012355	-0.000221542	0.00201838	7.21535e-06	0.233231	0.0763944	0.803863	1.11862e-07	0.786034	0.269282	0.235236	0.921714	6.61625e-06	0.908469
A5.1184	A5	1	[27737620 27737731]	[27737625 27737731]	+	AT1G73740_and_AT1G73750	0.261611	0.286368	0.204074	-0.0120678	0.00359609	0.000386177	3.9054e-15	4.8044e-08	0.0116404	0.0778826	0.00673716	8.38459e-15	8.40981e-07	0.0677289	0.335191	0.0433207
A5.2087	A5	1	[27740160 27740579]	[27740160 27740269]	-	AT1G73760	0.00568683	0.0206488	-0.00618681	-0.000339462	0.000742103	3.08126e-05	0.0120271	0.46328	0.753105	0.10682	0.337947	0.0160818	0.72141	0.896722	0.398366	0.590931
A5.2088	A5	1	[27748790 27749086]	[27748790 27749106]	-	AT1G73805	0.0649843	0.558412	0.0184586	-0.00846168	0.00185405	0.000380651	5.24092e-06	0.896786	0.63489	0.861714	0.573098	8.6728e-06	0.970325	0.829903	0.965907	0.776512
A5.2089	A5	1	[27765742 27766015]	[27765742 27765871]	-	AT1G73840	0.0012572	0.00787457	0.00117591	-0.000445786	5.08052e-06	1.47928e-05	0.00313434	0.667179	0.2026	0.972833	0.155882	0.00441208	0.855756	0.45695	1	0.380329
A5.761	A5	1	[27783296 27783417]	[27783312 27783417]	+	AT1G73875	0.101965	0.00990782	0.0229891	-0.0016281	0.00493601	0.000106648	0.561	0.188554	0.466719	2.27974e-07	0.109576	0.601756	0.431262	0.713833	1.27026e-05	0.308447
A5.760	A5	1	[27783509 27783741]	[27783512 27783741]	+	AT1G73875	0.0481791	0.0274732	0.0572382	-0.000741796	-0.000566191	1.2654e-05	0.113034	0.00128977	0.744431	0.559534	0.851946	0.136117	0.00900004	0.891902	0.835573	0.942497
A5.2463	A5	1	[27803685 27804360]	[27803685 27804363]	-	AT1G73940_and_AT1G73950	0.00483354	0.00389553	-0.00158165	-0.000708278	0.000400949	2.21337e-05	0.0507287	0.439382	0.0068014	0.000326853	0.00453244	0.0636537	0.702241	0.045367	0.00682795	0.0317836
A5.2094	A5	1	[27807753 27807927]	[27807753 27807944]	-	AT1G73960	0.0216073	0.951037	0.0431109	-0.000221969	-0.00134398	5.64701e-05	0	1.48102e-06	0.846394	0.00594483	0.0981143	0	2.03828e-05	0.942228	0.0639767	0.287166
A5.2095	A5	1	[27808031 27808547]	[27808031 27808180]	-	AT1G73960	0.0314458	0.0750599	0.0388711	0.00394165	-0.000464083	-0.000189977	1.95922e-08	0.00458678	0.0246582	0.535018	0.000278768	3.56537e-08	0.0263402	0.116962	0.821473	0.00339186
A5.2092	A5	1	[27809588 27809840]	[27809588 27809724]	-	AT1G73960	0.0833266	0.0762259	0.111315	-0.000854359	-0.00174925	-3.05566e-05	3.00689e-06	2.96978e-11	0.69003	0.0554945	0.632138	5.03598e-06	7.83444e-10	0.861778	0.276084	0.817291
A5.2090	A5	1	[27809588 27809840]	[27809588 27809844]	-	AT1G73960	0.0776818	0.0387069	0.0367518	-0.00266708	0.00255812	9.32591e-05	0.0165886	0.0266045	0.208513	0.00466957	0.139962	0.0218691	0.10833	0.464558	0.0538908	0.357068
A5.2091	A5	1	[27814057 27814158]	[27814057 27814305]	-	AT1G73960	0.00938979	0.98011	0.0154185	-7.8503e-05	-0.000376795	1.65409e-05	0	0.000722335	0.892971	0.129896	0.34137	0	0.0054541	0.96353	0.442336	0.594336
A5.763	A5	1	[27825507 27825787]	[27825701 27825787]	+	AT1G73990	0.0037975	0.00479576	-0.000758431	-0.000230466	0.000284746	1.12111e-05	0.0132749	0.70266	0.364594	0.00861268	0.138816	0.0176877	0.876304	0.628444	0.08363	0.355417
A5.762	A5	1	[27827250 27827576]	[27827228 27827576]	+	AT1G73990	0.116394	0.0498899	0.0402116	-0.00741528	0.00476139	0.00037542	3.51351e-07	6.2856e-05	8.02337e-09	3.76086e-18	1.11759e-22	6.11108e-07	0.000629483	3.73714e-07	1.16783e-15	3.26622e-20
A5.770	A5	1	[27887501 27887801]	[27887697 27887801]	+	AT1G74160	0.00133337	0.0102967	0.00969714	0.00276084	-0.000522736	-8.92165e-05	0.591802	0.62254	0.273339	0.626681	0.234825	0.631569	0.828035	0.541944	0.870067	0.486999
A5.2097	A5	1	[27893800 27893891]	[27893800 27893861]	-	AT1G74170	0.0120489	0.138137	-0.0345721	-0.0123318	0.00291381	0.000268288	2.08228e-06	0.247011	0.00124889	0.0737024	0.0184437	3.51328e-06	0.512166	0.0122063	0.325103	0.0910125
A5.2096	A5	1	[27893980 27894091]	[27893980 27894084]	-	AT1G74170	0.0800659	0.860141	0.0991053	0.00721605	-0.00121942	-0.000184818	9.07036e-125	0.00761859	0.130864	0.553517	0.194566	3.45499e-124	0.0399631	0.352832	0.832131	0.435468
A5.771	A5	1	[27914760 27915327]	[27914756 27915327]	+	AT1G74230	0.0118718	0.926021	0.0290271	0.00132003	-0.0010722	2.87734e-05	0	0.00064559	0.22526	0.0208874	0.375003	0	0.00494985	0.486665	0.151608	0.62539
A5.772	A5	1	[27942155 27942261]	[27942160 27942261]	+	AT1G74320	0.0758376	0.0286911	0.0310669	-0.00512108	0.00279817	0.000189902	0.0431179	0.0327805	0.00595164	0.000424318	0.000619202	0.0545146	0.127221	0.041056	0.00841579	0.00650577
A5.2465	A5	1	[27944966 27945070]	[27944966 27945065]	-	AT1G74340_and_AT1G74330_and_AT1G74350	0.0314978	0.0177056	0.0560273	-0.0021456	-0.00153309	5.96299e-05	0.0222098	1.74465e-12	0.03475	0.000403352	0.0489226	0.0289064	5.12394e-11	0.148815	0.00809147	0.181256
A5.2464	A5	1	[27948671 27951564]	[27948671 27948790]	-	AT1G74340_and_AT1G74330_and_AT1G74350	0.000792361	0.0147534	0.00496254	-2.17422e-05	-0.000260636	-1.07997e-06	0.00680532	0.374916	0.97576	0.39298	0.959601	0.00930026	0.647273	0.999327	0.725921	0.993071
A5.2098	A5	1	[27963466 27963537]	[27963466 27963556]	-	AT1G74390	0.0441572	0.111602	0.0734933	-0.0106388	-0.00183351	0.000286109	6.48439e-05	0.0103457	0.00371856	0.240975	0.00883278	0.000101678	0.0515467	0.028643	0.587893	0.0529682
A5.773	A5	1	[27987168 27987248]	[27987164 27987248]	+	AT1G74458	0.133917	0.662451	0.281034	0.0139223	-0.00919478	-0.000103293	0	1.58167e-75	1.07393e-12	2.77178e-28	0.0762158	0	6.20387e-73	1.09636e-10	3.17796e-25	0.243671
A5.2468	A5	1	[28009973 28010058]	[28009973 28010054]	-	AT1G74520_and_AT1G74530_and_AT1G09477	0.00249404	0.00561844	0.000509204	-0.000108516	0.000124052	4.87956e-06	0.338494	0.932613	0.887992	0.705728	0.831673	0.380745	0.982514	0.961166	0.905316	0.931967
A5.2467	A5	1	[28010877 28010975]	[28010877 28010971]	-	AT1G74520_and_AT1G74530_and_AT1G09477	0.279103	0.085528	0.309049	0.00781847	-0.00187162	-0.00040487	0.0215857	5.84287e-16	0.109559	0.368998	0.00541843	0.0281299	2.40907e-14	0.317484	0.708193	0.036519
A5.2469	A5	1	[28018050 28018165]	[28018050 28018137]	-	AT1G74560_and_AT1G09487	7.95435e-05	0.999968	0.000402196	-0.000182717	-2.01658e-05	6.22636e-06	0	0.686402	0.15168	0.710588	0.10109	0	0.867474	0.386229	0.907763	0.292346
A5.774	A5	1	[28066608 28066732]	[28066642 28066732]	+	AT1G74700	0.135273	0.373936	0.0485476	-0.00614664	0.00542036	0.000405712	5.85446e-11	0.40734	0.412237	0.0899303	0.0693034	1.1444e-10	0.675622	0.670128	0.363631	0.228533
A5.775	A5	1	[28085970 28086796]	[28086692 28086796]	+	AT1G74750	0.0506033	0.0845589	0.0407893	-0.00192738	0.000634048	0.000231415	0.00473427	0.186424	0.626232	0.71482	0.052329	0.00655741	0.428538	0.824667	0.91007	0.190036
A5.2099	A5	1	[28090694 28090783]	[28090694 28090780]	-	AT1G74770	0.0155927	0.00152763	0.000557429	-0.000364166	0.000939705	1.90526e-05	0.924051	0.97295	0.862538	0.294729	0.76111	0.941871	0.998851	0.949949	0.645639	0.894523
A5.1186	A5	1	[28099251 28099458]	[28099255 28099458]	+	AT1G74780_and_AT1G74790	0.0162821	-0.000534728	0.0091204	0.000939259	0.00044761	-3.31154e-05	0.858726	0.0030836	0.0172179	0.0077631	0.00482298	0.881678	0.0188481	0.0906472	0.0771908	0.0333735
A5.1187	A5	1	[28100547 28100658]	[28100543 28100658]	+	AT1G74780_and_AT1G74790	0.0230237	0.934841	0.0187512	-0.00499092	0.000267028	4.1884e-05	0	0.0254128	3.32321e-06	0.559605	0.190326	0	0.104765	8.02145e-05	0.835573	0.429657
A5.2100	A5	1	[28102930 28103034]	[28102930 28103012]	-	AT1G74800	0.116415	0.0796617	0.164955	-0.00412937	-0.00303376	0.000122191	0.00254433	1.11774e-09	0.2333	0.0400131	0.23653	0.00360932	2.44818e-08	0.496408	0.227198	0.488981
A5.2101	A5	1	[28103640 28103764]	[28103640 28103760]	-	AT1G74800	0.0441602	-0.000112971	0.089181	0.000666659	-0.0028138	-2.57114e-05	0.992573	7.88993e-13	0.675566	3.43162e-05	0.588002	1	2.41477e-11	0.854235	0.00101889	0.786447
A5.780	A5	1	[28107935 28108394]	[28107927 28108394]	+	AT1G74810	0.398827	0.379654	0.469982	-0.00602248	-0.00459395	0.000218211	0.00391951	0.000502609	0.729129	0.540374	0.677139	0.00547544	0.0039679	0.882402	0.824896	0.846992
A5.778	A5	1	[28108592 28108664]	[28108516 28108664]	+	AT1G74810	0.034121	0.204696	-0.0661588	-0.011575	0.00591274	0.00037856	0.000387022	0.274009	0.134579	0.0924021	0.113865	0.000581069	0.544052	0.359159	0.369224	0.315781
A5.779	A5	1	[28109213 28109343]	[28109254 28109343]	+	AT1G74810	0.00233724	0.886975	-0.0325257	0.00452152	0.00216742	-0.000111649	7.21761e-101	0.448534	0.408451	0.362131	0.497697	2.61303e-100	0.70974	0.666932	0.702761	0.722017
A5.2103	A5	1	[28167969 28168048]	[28167969 28168043]	-	AT1G75010	0.0647526	0.139389	0.103962	-0.0147714	-0.00245057	0.000614996	9.9779e-06	0.00131958	0.000361463	0.165227	6.23257e-07	1.63116e-05	0.00917796	0.00437133	0.496664	1.70296e-05
A5.2104	A5	1	[28168862 28169110]	[28168862 28169089]	-	AT1G75010	0.0775805	0.0552006	-0.0354189	-0.00203126	0.00712868	6.21496e-05	0.11179	0.317437	0.657273	0.000232793	0.649001	0.134667	0.590907	0.842796	0.00514804	0.82937
A5.2105	A5	1	[28168862 28169114]	[28168862 28169089]	-	AT1G75010	0.00920424	0.0271798	-0.0229633	-0.00173109	0.00201047	5.37853e-05	0.0114844	0.0373806	0.220011	0.000835924	0.200911	0.015381	0.140462	0.479811	0.014429	0.443675
A5.2102	A5	1	[28168862 28169110]	[28168862 28169114]	-	AT1G75010	0.129317	0.686692	0.140493	0.00720719	-0.00069851	-0.000231564	5.12509e-130	1.30988e-06	0.0523874	0.659259	0.0364479	1.98028e-129	1.82465e-05	0.19778	0.88342	0.147524
A5.1190	A5	1	[28171244 28171749]	[28171117 28171749]	+	AT1G75020_and_AT1G75030	0.000474064	1.00103	-0.00299114	-0.000437797	0.000216575	5.85569e-06	0	0.400635	0.336292	0.264632	0.666013	0	0.669258	0.603508	0.614608	0.840126
A5.2106	A5	1	[28216380 28216740]	[28216380 28216775]	-	AT1G75180	0.156811	0.657107	0.236199	0.00279455	-0.00496176	-0.000112956	8.00082e-62	6.12223e-09	0.59086	0.0251888	0.465828	2.55549e-61	1.21024e-07	0.800725	0.170887	0.697506
A5.2107	A5	1	[28216380 28217194]	[28216380 28216775]	-	AT1G75180	0.000731424	0.0331685	-0.00713308	0.00130845	0.000491532	-3.64596e-05	1.25914e-11	0.155649	0.0417811	0.0729011	0.0569398	2.50249e-11	0.381256	0.169133	0.323294	0.201273
A5.2108	A5	1	[28218008 28218146]	[28218008 28218373]	-	AT1G75180	0.00977561	0.973942	0.0136331	0.000241921	-0.000241095	1.4755e-05	0	0.0134655	0.731787	0.423089	0.48293	0	0.0634133	0.884219	0.746509	0.710605
A5.783	A5	1	[28223985 28224997]	[28224269 28224997]	+	AT1G75210	0.000250382	0.92939	0.0568627	-0.000674151	-0.00353827	-7.32744e-06	9.58859e-102	0.201538	0.90579	0.145185	0.965564	3.47859e-101	0.449891	0.968563	0.466761	0.995686
A5.782	A5	1	[28223985 28224997]	[28224673 28224997]	+	AT1G75210	0.0829773	0.0936657	-0.070721	-0.0118119	0.00701117	0.000556019	0.157185	0.347041	0.182886	0.0856448	0.0437067	0.185785	0.621041	0.431657	0.353768	0.167597
A5.781	A5	1	[28224269 28224997]	[28224673 28224997]	+	AT1G75210	0.00782507	0.0114904	-0.00837823	-0.00179893	0.00101271	8.35711e-05	0.0353584	0.134766	0.0120764	0.000920862	9.10385e-05	0.0450962	0.346894	0.0696318	0.0155971	0.0013219
A5.2109	A5	1	[28267395 28267606]	[28267395 28267614]	-	AT1G75330	0.0478634	0.948668	0.034861	-0.000155061	0.000812646	-1.76912e-05	0	3.98727e-14	0.792645	0.00123369	0.314131	0	1.42178e-12	0.916777	0.0197192	0.569532
A5.2110	A5	1	[28283245 28283417]	[28283245 28283345]	-	AT1G75380	0.012213	0.862369	0.0297263	-0.00241076	-0.00109458	0.000216281	0	0.00636739	0.0837454	0.0655558	1.91828e-07	0	0.0344799	0.2674	0.305442	5.99412e-06
A5.2111	A5	1	[28301950 28302402]	[28301950 28302711]	-	AT1G75410	0.0178734	0.514641	0.0177253	-0.00329124	9.25963e-06	8.50397e-05	1.15578e-35	0.67559	0.543618	0.996803	0.598415	3.17078e-35	0.860656	0.768691	1	0.793539
A5.2470	A5	1	[28372120 28372562]	[28372120 28373191]	-	AT1G75520_and_AT1G75560_and_AT1G75550	0.000536839	0.615514	0.0507806	0.0182093	-0.00314024	-0.000445999	1.09893e-59	0.190097	0.00024027	0.137475	0.00253752	3.47872e-59	0.43334	0.00312249	0.455702	0.0200221
A5.2471	A5	1	[28439068 28439573]	[28439068 28439500]	-	AT1G75720_and_AT1G75730	0.149013	-0.141693	0.0394412	0.0572074	0.00684821	-0.00159012	0.242354	0.751078	0.000322847	0.312681	0.000794077	0.279114	0.901521	0.00398347	0.662867	0.00795678
A5.2113	A5	1	[28442116 28442209]	[28442116 28442212]	-	AT1G75750	0.000204539	0.000331424	0.000187273	-2.25984e-05	1.07918e-06	5.0895e-07	0.00778745	0.142721	0.166836	0.876958	0.296052	0.0105895	0.360217	0.408085	0.97214	0.556149
A5.2114	A5	1	[28482774 28482891]	[28482774 28482862]	-	AT1G75850	0.0263728	0.0310162	-0.0273782	-0.00347996	0.00335944	0.000107419	0.0246704	0.0532407	0.0548131	1.376e-05	0.0466499	0.0319791	0.181653	0.204107	0.00046401	0.175518
A5.785	A5	1	[28490869 28491170]	[28490873 28491170]	+	AT1G75880	0.00538845	0.972884	0.00619255	0.00224505	-5.02561e-05	-6.13322e-05	0	0.344639	0.00740865	0.888198	0.0140771	0	0.61845	0.048242	0.976426	0.0748151
A5.786	A5	1	[28491304 28491390]	[28491301 28491390]	+	AT1G75880	0.00159352	1.00123	-2.36031e-06	-0.000522384	9.97425e-05	1.43314e-05	0	0.99928	0.118702	0.484765	0.15083	0	1	0.332879	0.789423	0.373451
A5.2472	A5	1	[28523572 28523765]	[28523572 28523718]	-	AT1G75980_and_AT1G75990	0.145144	0.9521	-0.0584394	0.00574106	0.012724	-0.000690407	2.72137e-245	0.0453692	0.124385	1.38348e-15	5.57699e-10	1.23083e-244	0.161932	0.341964	3.12435e-13	2.95819e-08
A5.2115	A5	1	[28533071 28533291]	[28533071 28533203]	-	AT1G76020	0.0981709	0.0822368	0.0117932	-0.00882418	0.0053986	0.000391707	2.77093e-05	0.557933	0.000611186	8.81261e-07	3.3077e-07	4.43784e-05	0.785942	0.00672801	4.23034e-05	9.77231e-06
A5.788	A5	1	[28542015 28542153]	[28542011 28542153]	+	AT1G76050	0.0013411	0.0518696	0.0111917	0.000591605	-0.000615661	7.36207e-05	0.00149565	0.504215	0.782592	0.500657	0.249124	0.00215961	0.747384	0.912148	0.800245	0.503652
A5.789	A5	1	[28542011 28542153]	[28542034 28542153]	+	AT1G76050	0.0993245	0.282372	0.186795	0.00888095	-0.00510116	-0.00024291	0.0196661	0.0663173	0.475309	0.311585	0.451423	0.0257397	0.212389	0.720297	0.662034	0.68763
A5.790	A5	1	[28542015 28542153]	[28542034 28542153]	+	AT1G76050	0.0227233	0.0130869	0.0352698	0.00246377	-0.000784154	-1.83238e-05	0.30646	0.00721878	0.142418	0.273568	0.71426	0.347241	0.0382495	0.372443	0.624813	0.867627
A5.792	A5	1	[28572226 28572320]	[28572243 28572320]	+	AT1G76140	0.00739409	0.0541309	0.00065957	-0.000926346	0.000420907	1.03347e-05	3.44193e-14	0.92826	0.322981	0.292255	0.711331	7.23991e-14	0.9805	0.593044	0.642672	0.866102
A5.2116	A5	1	[28585958 28586187]	[28585958 28586120]	-	AT1G76170	0.0534098	0.752887	0.17651	0.00314647	-0.00791912	0.000186139	1.02722e-24	0.111657	0.750998	0.119007	0.52785	2.54077e-24	0.304724	0.895712	0.421281	0.744087
A5.793	A5	1	[28611033 28611169]	[28611020 28611169]	+	AT1G76260	0.093032	0.0774031	-0.0346507	-0.0031542	0.00798017	0.000122547	0.00427	0.212431	0.374995	1.41058e-07	0.247353	0.00594529	0.465312	0.637938	8.18081e-06	0.50154
A5.2117	A5	1	[28620160 28620250]	[28620160 28620267]	-	AT1G76280	0.000266797	1.00658	-0.00694928	-0.0050568	0.000451005	0.000134963	0	0.72805	0.0479652	0.679124	0.0764778	0	0.89026	0.186069	0.892563	0.244143
A5.794	A5	1	[28626918 28627023]	[28626922 28627023]	+	AT1G76300	0.000471418	0.000371305	-0.000498883	-6.75101e-05	6.06438e-05	2.10969e-06	0.618128	0.513834	0.489853	0.145737	0.468914	0.65703	0.754255	0.730966	0.46768	0.699789
A5.797	A5	1	[28633401 28633585]	[28633407 28633585]	+	AT1G76320	0.10442	0.805153	0.177144	-0.0109112	-0.00454523	0.000481759	2.01669e-192	2.21249e-10	0.00225007	0.00283949	5.97827e-06	8.59926e-192	5.22618e-09	0.0193857	0.0374536	0.000125061
A5.795	A5	1	[28633401 28633585]	[28633460 28633585]	+	AT1G76320	0.156852	0.36878	0.361899	-0.0357966	-0.0154194	0.000906861	6.65715e-09	1.67716e-07	4.39289e-05	0.000226528	0.000579841	1.22826e-08	2.70542e-06	0.000736929	0.00504316	0.00618428
A5.796	A5	1	[28633407 28633585]	[28633460 28633585]	+	AT1G76320	0.00376627	0.110688	0.00966462	-0.00830014	-0.000368647	0.000167966	1.69161e-13	0.530424	2.54027e-05	0.66092	0.00423457	3.50285e-13	0.766419	0.000458108	0.883612	0.0300512
A5.798	A5	1	[28639761 28640115]	[28639952 28640115]	+	AT1G76350	0.00277244	0.0109963	-0.0123128	-0.000101818	0.000987551	4.81843e-06	0.361379	0.319398	0.949244	0.156654	0.920451	0.404059	0.593004	0.987267	0.484374	0.974756
A5.2118	A5	1	[28643872 28643984]	[28643872 28643979]	-	AT1G76360	0.257305	-0.028351	0.153917	0.0118055	0.00646173	-0.000323077	0.255833	1.81894e-09	0.000312304	3.70285e-06	0.00092963	0.293548	3.85925e-08	0.00387101	0.000148963	0.00904447
A5.2121	A5	1	[28653608 28653741]	[28653608 28654173]	-	AT1G76380	0.00237151	0.994919	-0.00414161	0.000229345	0.00040707	-1.68632e-05	0	0.574311	0.807911	0.311533	0.548534	0	0.796993	0.923283	0.662034	0.759018
A5.2119	A5	1	[28653608 28654173]	[28653608 28654162]	-	AT1G76380	0.0024104	0.00312596	-0.000802661	0.00155832	0.000200816	-6.23213e-05	0.765881	0.94059	0.258087	0.73251	0.129025	0.796557	0.985572	0.525237	0.9175	0.340706
A5.800	A5	1	[28684846 28684924]	[28684851 28684924]	+	AT1G76450	0.0815099	0.0204623	0.0319521	-0.0022102	0.00309736	0.000147958	0.00274601	5.15445e-06	0.0137196	5.50431e-16	3.07445e-08	0.00388581	6.41295e-05	0.0767462	1.33401e-13	1.15865e-06
A5.2122	A5	1	[28710853 28711064]	[28710853 28711133]	-	AT1G76510	0.000891319	0.994876	0.0031626	0.000325721	-0.000141955	-6.02412e-06	0	0.00455334	0.022384	0.019584	0.156312	0	0.0261734	0.109084	0.144755	0.381157
A5.2123	A5	1	[28712510 28712733]	[28712510 28712756]	-	AT1G76510	0.0145393	0.353889	0.00657532	0.00520089	0.00049775	-0.000427641	7.5927e-26	0.849006	0.239184	0.79164	0.00116162	1.90136e-25	0.951332	0.50375	0.943273	0.0108314
A5.802	A5	1	[28785050 28785134]	[28785046 28785134]	+	AT1G76705	0.0301613	0.994219	0.0356573	-0.00363816	0.000148517	2.95432e-06	0	0.23165	0.291662	0.922843	0.977198	0	0.49251	0.56258	0.98882	1
A5.2125	A5	1	[28803934 28804137]	[28803934 28804154]	-	AT1G76730	0.635764	0.147014	0.614338	0.00950715	0.00133913	-0.00027947	2.19742e-08	5.39567e-115	0.00583413	0.362445	0.00652906	3.99202e-08	4.59557e-112	0.0404312	0.702776	0.0422469
A5.803	A5	1	[28852707 28852934]	[28852820 28852934]	+	AT1G76850	0.0031159	0.070503	0.0020253	-0.00336363	6.81626e-05	0.000108747	2.605e-23	0.780612	0.000299788	0.863575	8.7436e-05	6.33763e-23	0.917482	0.00374978	0.966708	0.00127893
A5.2478	A5	1	[28924900 28925205]	[28924900 28924986]	-	AT1G76965_and_AT1G76970_and_AT1G76980	0.00104788	-0.00258447	-0.00676217	0.00143417	0.000447763	-4.83721e-05	0.802134	0.547251	0.295212	0.454194	0.237213	0.829976	0.77843	0.566064	0.769115	0.489576
A5.2480	A5	1	[28924900 28925058]	[28924900 28925205]	-	AT1G76965_and_AT1G76970_and_AT1G76980	0.0198558	0.980655	0.0149447	-0.011016	0.000332077	0.000356309	2.19319e-89	0.778019	0.0915281	0.906555	0.0679206	7.70526e-89	0.915805	0.283619	0.98217	0.225821
A5.1192	A5	1	[28932382 28933338]	[28933242 28933338]	+	AT1G76990_and_AT1G76994	0.00132964	0.0104348	0.00019639	-9.05928e-05	7.08279e-05	-4.8977e-06	9.95838e-15	0.887088	0.60869	0.347898	0.352943	2.12042e-14	0.966753	0.812848	0.691401	0.605399
A5.804	A5	1	[28940418 28940865]	[28940466 28940865]	+	AT1G77000	0.0224212	0.629097	0.218677	-0.0277346	-0.012266	0.00097146	5.07956e-07	0.0887476	0.0915571	0.0801174	0.0473149	8.78775e-07	0.260285	0.283619	0.340651	0.17706
A5.807	A5	1	[28958391 28958601]	[28958490 28958601]	+	AT1G77080	0.33112	-0.0236683	0.261905	0.0157829	0.00432594	-0.000443286	0.498982	3.04164e-13	0.000592815	0.027249	0.0012044	0.541774	9.7496e-12	0.00655483	0.17869	0.0111535
A5.806	A5	1	[28958391 28958601]	[28958501 28958601]	+	AT1G77080	0.11435	0.315896	0.183554	0.000685451	-0.00432523	0.000350359	5.75761e-23	2.28554e-08	0.870419	0.0157781	0.00513581	1.39427e-22	4.16709e-07	0.953402	0.125828	0.034954
A5.805	A5	1	[28958501 28958601]	[28958490 28958601]	+	AT1G77080	0.223017	-0.0387107	0.221692	0.0181983	8.28067e-05	-0.000581871	0.080266	1.60207e-22	3.73226e-10	0.946698	1.78229e-11	0.0985148	1.04732e-20	2.31237e-08	0.995698	1.26132e-09
A5.809	A5	1	[28985924 28986032]	[28985928 28986032]	+	AT1G77140	0.00307482	0.974502	0.00752297	0.000149779	-0.000278009	6.9256e-06	0	0.508651	0.918081	0.654359	0.873187	0	0.750712	0.973728	0.88342	0.952496
A5.810	A5	1	[29013832 29014098]	[29013899 29014098]	+	AT1G77220	0.00479059	0.963971	0.0158073	-0.00275099	-0.000688544	4.99725e-05	0	0.254008	0.120758	0.362422	0.344174	0	0.521306	0.335739	0.702776	0.596962
A5.811	A5	1	[29015147 29015233]	[29015155 29015233]	+	AT1G77220	0.020732	-0.00155194	0.018639	0.000518518	0.000130811	-1.70593e-05	0.819556	0.00757316	0.561465	0.731185	0.521415	0.846446	0.03977	0.780656	0.917052	0.739386
A5.2126	A5	1	[29043495 29043582]	[29043495 29043619]	-	AT1G77300	0.00169366	0.986682	-0.0080675	-0.000599204	0.000610073	1.60783e-05	0	0.278718	0.529459	0.133229	0.571192	0	0.5502	0.759117	0.448713	0.775083
A5.2127	A5	1	[29048821 29049153]	[29048821 29049178]	-	AT1G77300	0.000736996	1.00013	-0.00303271	-0.000320274	0.000235606	4.42375e-06	0	0.404599	0.491489	0.235284	0.749795	0	0.673052	0.732345	0.580958	0.889047
A5.1193	A5	1	[29056919 29057007]	[29056898 29057007]	+	AT1G77310_and_AT1G77320	0.00317051	0.00445688	-0.0052181	-0.000768272	0.000524288	2.47696e-05	0.539309	0.483577	0.420134	0.196964	0.383021	0.580746	0.736165	0.677056	0.53325	0.632744
A5.1194	A5	1	[29057813 29058443]	[29057767 29058443]	+	AT1G77310_and_AT1G77320	0.111125	0.656588	0.134147	0.00803953	-0.00143885	-5.50588e-05	7.10617e-27	0.032554	0.316695	0.674294	0.817982	1.79994e-26	0.126507	0.587486	0.889924	0.924554
A5.1195	A5	1	[29059094 29059211]	[29059104 29059211]	+	AT1G77310_and_AT1G77320	0.0891365	0.0450782	0.105556	0.0015809	-0.00102622	6.10442e-05	0.456404	0.0891367	0.842263	0.761929	0.796491	0.500952	0.261018	0.940158	0.931326	0.913946
A5.1196	A5	1	[29095443 29095758]	[29095438 29095758]	+	AT1G77420_and_AT1G77440	0.173518	0.0848728	0.24553	0.00415973	-0.00306957	7.52613e-05	0.481241	0.025245	0.745718	0.57264	0.830691	0.525506	0.104203	0.89233	0.841662	0.931426
A5.1197	A5	1	[29096025 29096451]	[29096339 29096451]	+	AT1G77420_and_AT1G77440	0						1	1	1	1	1	1	1	1	1	1
A5.813	A5	1	[29103712 29103905]	[29103701 29103905]	+	AT1G77460	0.0706643	0.802321	0.0599633	0.0117994	0.000788485	-0.000285652	1.3605e-36	0.357593	0.161645	0.830114	0.261344	3.75524e-36	0.630636	0.400918	0.956282	0.51848
A5.812	A5	1	[29107598 29107969]	[29107772 29107969]	+	AT1G77460	0.00322483	0.00767265	0.0117685	0.000124874	-0.000533977	4.72716e-05	0.603532	0.437485	0.948655	0.518422	0.413277	0.643074	0.700664	0.987141	0.811795	0.656959
A5.1198	A5	1	[29118694 29118797]	[29118713 29118797]	+	AT1G77490_and_AT1G77500	0.00994468	0.00695098	0.00836151	-0.000478345	9.8948e-05	4.1725e-05	0.00630191	0.00135999	0.152087	0.48719	2.75522e-05	0.00863844	0.00941068	0.386737	0.790574	0.000471487
A5.2129	A5	1	[29144568 29144661]	[29144568 29144642]	-	AT1G77580	0.00589409	0.0633523	0.00229033	0.000702371	0.000225235	-7.917e-05	0.00139684	0.910347	0.787238	0.839152	0.307238	0.00202047	0.974811	0.914024	0.958728	0.563876
A5.2130	A5	1	[29194923 29195023]	[29194923 29195031]	-	AT1G77680	0.0913907	0.00985483	-0.0221127	-0.00175035	0.00709396	5.76652e-05	0.782854	0.546645	0.709192	0.000392968	0.680076	0.812198	0.778122	0.871076	0.00790978	0.848707
A5.814	A5	1	[29210895 29211220]	[29210899 29211220]	+	AT1G77720	0.00719686	-0.00228618	0.0125157	0.000747365	-0.000332742	-1.13636e-05	0.816486	0.215536	0.565286	0.552404	0.769435	0.843655	0.469742	0.783411	0.831272	0.899076
A5.2131	A5	1	[29247291 29247833]	[29247291 29247926]	-	AT1G77770	0.0429769	0.893134	0.022255	0.00382257	0.00129512	-0.000120043	0	0.0815248	0.0193602	0.0631497	0.0137115	0	0.245803	0.0988601	0.298571	0.0733165
A5.815	A5	1	[29255721 29255802]	[29255727 29255802]	+	AT1G77800	0.105929	0.0586697	0.0308999	0.00292504	0.00468932	0.000149763	0.142837	0.451894	0.577811	0.0363828	0.338857	0.169803	0.712259	0.792152	0.213629	0.591854
A5.816	A5	1	[29259885 29259983]	[29259865 29259983]	+	AT1G77800	0.110407	0.783643	0.138634	0.00553151	-0.00176421	-8.60327e-05	1.28041e-55	0.00674468	0.398171	0.527414	0.659192	3.97594e-55	0.0361747	0.657917	0.817042	0.835232
A5.2132	A5	1	[29261824 29261901]	[29261824 29261905]	-	AT1G77810	0.0559086	0.174337	0.0754758	-0.0141507	-0.00122295	0.000349561	8.47148e-08	0.0237855	0.000924081	0.501958	0.00602467	1.50749e-07	0.099585	0.0095483	0.801162	0.0397247
A5.1201	A5	1	[29292583 29292660]	[29292573 29292660]	+	AT1G77890_and_AT1G77910	0.0433794	0.873898	0.0271661	-0.00713311	0.00101333	0.000178377	7.08378e-90	0.542445	0.211266	0.677057	0.294097	2.49136e-89	0.774866	0.467893	0.891478	0.554034
A5.1199	A5	1	[29293278 29293400]	[29293272 29293400]	+	AT1G77890_and_AT1G77910	0.403913	0.168176	0.262063	0.00366707	0.00886567	-4.6814e-05	0.000185851	1.37067e-08	0.534665	0.000430844	0.790218	0.00028423	2.58278e-07	0.763258	0.0085056	0.910569
A5.818	A5	1	[29355115 29355210]	[29355135 29355210]	+	AT1G78070	0.0170085	0.0282648	0.0148846	0.00514787	0.000132744	-0.000200462	0.245284	0.550897	0.106911	0.92233	0.0351114	0.282192	0.780896	0.313189	0.988626	0.143608
A5.822	A5	1	[29356708 29357084]	[29355825 29357084]	+	AT1G78070	0.0333904	0.724237	0.0679959	0.00442706	-0.00216284	-2.69406e-06	4.97073e-186	0.00776554	0.175511	0.120625	0.977927	2.10091e-185	0.0405555	0.420998	0.424537	1
A5.817	A5	1	[29357408 29357493]	[29357413 29357493]	+	AT1G78070	0.0291545	0.92937	0.0524208	0.00314619	-0.00145414	-3.81823e-05	0	1.4248e-18	3.69148e-05	7.73813e-06	0.0928509	0	7.07886e-17	0.00063572	0.000283732	0.27701
A5.1203	A5	1	[29455507 29455583]	[29455499 29455583]	+	AT1G78260_and_AT1G78265_and_AT1G78280	0.0650717	0.0238346	-0.0311329	-0.00470188	0.00601278	0.000179152	0.0573732	0.0155326	0.00428596	1.06911e-17	0.000259612	0.0715246	0.0712129	0.0318694	3.12451e-15	0.00318872
A5.2134	A5	1	[29458920 29459011]	[29458920 29459267]	-	AT1G78290	0.00891527	0.991414	0.00130007	-0.00054117	0.00047595	-7.65408e-06	0	0.847666	0.531975	0.197366	0.766715	0	0.950925	0.76125	0.533922	0.897501
A5.823	A5	1	[29505952 29506055]	[29505949 29506055]	+	AT1G78420	0.0268486	0.0133966	0.0324863	-0.00043414	-0.00035236	1.00716e-05	0.0115935	2.41972e-09	0.533124	0.235502	0.627493	0.0155215	5.05479e-08	0.762117	0.581351	0.814029
A5.2137	A5	1	[29517588 29517684]	[29517588 29517674]	-	AT1G78450	0.0504776	0.0383958	-0.018252	0.000285089	0.0042956	-4.17669e-05	0.146232	0.500786	0.934493	0.00367913	0.686108	0.173604	0.745637	0.980474	0.0453015	0.852321
A5.2138	A5	1	[29536822 29536972]	[29536822 29536976]	-	AT1G78510	0.000342388	1.00037	-0.000431501	-0.000110528	4.8368e-05	2.6749e-06	0	0.693293	0.429762	0.417739	0.521303	0	0.870263	0.685274	0.743477	0.739263
A5.1204	A5	1	[29568324 29568398]	[29568200 29568398]	+	AT1G78590_and_AT1G78600	0.00414964	0.804911	0.0237821	0.00683963	-0.00122703	-6.16527e-05	0	0.0808502	8.69928e-05	0.0987268	0.235148	0	0.244313	0.00133192	0.382142	0.487365
A5.2145	A5	1	[29574981 29575335]	[29574981 29575308]	-	AT1G78620	0.00588024	-0.000290436	0.00221939	0.000207271	0.000228803	-4.51224e-06	0.917704	0.441511	0.574252	0.145833	0.681461	0.935754	0.704271	0.789246	0.467737	0.849688
A5.2143	A5	1	[29574981 29575335]	[29574981 29575400]	-	AT1G78620	0.00705753	0.000611898	0.00952629	0.000185447	-0.000154297	-6.09014e-06	0.833265	0.00139989	0.626908	0.342882	0.592129	0.859146	0.00965322	0.825228	0.687286	0.788914
A5.1205	A5	1	[29597190 29597315]	[29597210 29597315]	+	AT1G78690_and_AT1G78700_and_AT1G78710	0.0174147	0.699016	0.00160577	0.00263207	0.000988058	-0.000164137	2.65664e-53	0.972547	0.659293	0.697907	0.356138	8.15262e-53	0.998685	0.84424	0.902156	0.608295
A5.1206	A5	1	[29597190 29597315]	[29597235 29597315]	+	AT1G78690_and_AT1G78700_and_AT1G78710	0.387498	0.0744055	0.405162	0.0158982	-0.00110398	-0.000206585	0.234793	2.85837e-10	0.0530993	0.752781	0.398956	0.270961	6.68822e-09	0.199697	0.926983	0.646633
A5.1207	A5	1	[29597210 29597315]	[29597235 29597315]	+	AT1G78690_and_AT1G78700_and_AT1G78710	0.291842	0.0287021	0.243965	0.00721024	0.00299234	8.89163e-06	0.479812	4.7858e-09	0.176255	0.188088	0.955364	0.524157	9.61353e-08	0.422089	0.521967	0.991201
A5.2147	A5	1	[29608112 29608255]	[29608112 29608214]	-	AT1G78730	0						1	1	1	1	1	1	1	1	1	1
A5.2485	A5	1	[29622210 29622363]	[29622210 29622302]	-	AT1G78780_and_AT1G78790	0.00240048	0.300307	0.00338685	0.00500295	-6.16481e-05	-0.00010179	7.66708e-19	0.922367	0.260524	0.974061	0.442303	1.75623e-18	0.978957	0.527775	1	0.681586
A5.2487	A5	1	[29624300 29624438]	[29624300 29624487]	-	AT1G78780_and_AT1G78790	0.0133178	0.989328	0.00675732	-0.00258682	0.000410033	3.71733e-05	0	0.61929	0.137105	0.580508	0.473371	0	0.825886	0.363647	0.84589	0.703344
A5.2488	A5	1	[29626619 29626728]	[29626619 29626733]	-	AT1G78810_and_AT1G78800	0.00723625	0.960335	0.000860697	-0.00531554	0.000398472	5.17579e-05	0	0.953733	0.00509987	0.622458	0.360066	0	0.990885	0.0363441	0.868498	0.612087
A5.2489	A5	1	[29628545 29628692]	[29628545 29628635]	-	AT1G78810_and_AT1G78800	0.097281	0.257311	0.146932	-0.00541083	-0.00310319	0.000124643	1.21662e-07	0.00322922	0.396624	0.254235	0.512241	2.15365e-07	0.0196255	0.656546	0.603019	0.733213
A5.825	A5	1	[29651018 29651315]	[29651015 29651315]	+	AT1G78870	0.000258151	0.999731	-0.00107953	5.31132e-05	8.36051e-05	-3.41903e-06	0	0.0568206	0.463892	0.00685298	0.11355	0	0.190317	0.711422	0.0709577	0.315199
A5.826	A5	1	[29665589 29665763]	[29665602 29665763]	+	AT1G78910	0.392177	0.613658	0.409292	-0.0053507	-0.00106965	0.000144257	6.17944e-44	1.59553e-19	0.355745	0.665041	0.403367	1.79734e-43	8.67934e-18	0.62075	0.885118	0.649954
A5.827	A5	1	[29666445 29666528]	[29666434 29666528]	+	AT1G78910	0.136989	0.0937801	0.148893	-0.00874749	-0.000743959	0.000272067	0.0172988	0.000229834	0.09073	0.735822	0.0774403	0.0227602	0.00199341	0.281882	0.919391	0.246049
A5.829	A5	1	[29703283 29703396]	[29703179 29703396]	+	AT1G78970	0.0055368	0.0144219	0.00552954	0.00159814	-2.23239e-05	-6.09195e-05	0.435519	0.770702	0.512503	0.98306	0.402591	0.480169	0.912488	0.747713	1	0.649447
A5.830	A5	1	[29706285 29706576]	[29706278 29706576]	+	AT1G78970	0.182031	0.0599552	0.129807	-0.00493777	0.00326398	0.000125667	0.100929	0.000536479	0.303354	0.110576	0.379319	0.122314	0.00420632	0.574485	0.405794	0.629244
A5.2490	A5	1	[29722456 29722558]	[29722456 29722630]	-	AT1G79000_and_AT1G78990_and_AT1G78995	0.00411278	0.115337	0.058209	0.000274233	-0.00338102	2.0063e-05	1.26235e-07	0.00933447	0.923741	0.00564463	0.814179	2.23341e-07	0.0473393	0.976202	0.0617665	0.922976
A5.2491	A5	1	[29723630 29723790]	[29723630 29723735]	-	AT1G79000_and_AT1G78990_and_AT1G78995	0.059128	0.0545014	0.029727	-0.002626	0.00183756	0.000135461	0.0448794	0.28624	0.461547	0.226922	0.202403	0.0566287	0.55831	0.709468	0.571136	0.445764
A5.2150	A5	1	[29725934 29726011]	[29725934 29726017]	-	AT1G79010	0.106976	0.0305998	0.0363009	-0.00551447	0.00441721	0.000172807	0.00108074	0.000157009	7.19637e-06	3.43876e-17	2.35908e-06	0.0015751	0.00143483	0.000155904	9.58031e-15	5.55045e-05
A5.2493	A5	1	[29729212 29729512]	[29729212 29729507]	-	AT1G79020_and_AT1G79030	0.00306511	0.0863079	0.00734045	-0.0065664	-0.000267209	0.000251219	0.000119793	0.749811	0.0257722	0.831496	0.00419797	0.000185133	0.900888	0.120835	0.956673	0.0298453
A5.2492	A5	1	[29729841 29729903]	[29729841 29730356]	-	AT1G79020_and_AT1G79030	0.0790453	0.158795	-0.0381976	-0.0168652	0.00732768	0.000720236	0.0178657	0.578673	0.0553109	0.0508488	0.00601874	0.0234666	0.799791	0.20521	0.262853	0.0396944
A5.2494	A5	1	[29751586 29751921]	[29751586 29751917]	-	AT1G79090_and_AT1G79080	0.00708424	0.0036396	0.00396903	-9.6357e-05	0.0001947	2.89805e-06	0.196337	0.169617	0.794391	0.216837	0.7925	0.229055	0.403985	0.917342	0.559149	0.911787
A5.831	A5	1	[29790993 29791131]	[29791022 29791131]	+	AT1G79190	0.247913	0.366548	0.303228	0.00465144	-0.00345721	-0.000263111	3.65493e-15	2.2519e-10	0.446947	0.184957	0.148796	7.85137e-15	5.31506e-09	0.699354	0.518096	0.370547
A5.832	A5	1	[29792210 29792308]	[29792228 29792308]	+	AT1G79190	0.508724	-0.023831	0.346745	0.0125805	0.0101237	-0.000184367	0.604588	2.07149e-13	0.037284	8.48036e-05	0.305674	0.644107	6.77839e-12	0.156342	0.00217352	0.563876
A5.1212	A5	1	[29802240 29802347]	[29802244 29802347]	+	AT1G79220_and_AT1G79230	0.000364705	0.000590112	-0.000491554	-0.000115868	5.35162e-05	4.52612e-06	0.42385	0.5161	0.231545	0.195006	0.116767	0.468344	0.755719	0.494119	0.530734	0.320439
A5.2156	A5	1	[29805916 29806011]	[29805916 29806537]	-	AT1G79245	0.564248	0.0555955	0.690345	-0.00308859	-0.00788104	0.000396853	0.327734	2.26087e-32	0.678701	0.0131799	0.0740435	0.369548	2.49617e-30	0.855651	0.111935	0.238946
A5.2152	A5	1	[29806725 29806802]	[29806725 29806867]	-	AT1G79245	0.00447141	0.0143466	0.009573	-0.000605517	-0.00031885	1.58768e-05	0.00116639	0.0346942	0.296439	0.197264	0.358198	0.00169651	0.132816	0.567375	0.533809	0.610372
A5.2155	A5	1	[29807148 29807248]	[29807148 29807242]	-	AT1G79245	0.0436856	0.98951	-0.0733413	-0.00544791	0.00658983	-4.9224e-05	8.94773e-221	0.0106038	0.130955	1.16407e-05	0.626718	3.937e-220	0.052589	0.352932	0.00039978	0.813443
A5.2157	A5	1	[29807586 29807690]	[29807586 29807715]	-	AT1G79245	0.025924	0.915529	0.0227897	0.000361482	0.000195894	1.03416e-05	0	0.105694	0.841031	0.79879	0.847283	0	0.293147	0.939451	0.945413	0.940272
A5.2153	A5	1	[29808077 29808150]	[29808077 29808180]	-	AT1G79245	0.205687	0.696762	0.0901811	0.00161478	0.00645378	-0.000411151	5.65689e-50	0.0572146	0.787	0.0104892	0.020293	1.70507e-49	0.191193	0.913926	0.0950698	0.0976269
A5.2154	A5	1	[29808263 29808388]	[29808263 29808369]	-	AT1G79245	0.144632	0.439076	0.125805	-0.00133781	0.00117671	9.3504e-05	5.20052e-41	0.000179966	0.755558	0.520752	0.465221	1.48295e-40	0.0016125	0.897803	0.813592	0.697095
A5.842	A5	1	[29815761 29816606]	[29815873 29816606]	+	AT1G79270	0.0538167	0.597084	0.107257	-0.00912302	-0.00334005	0.000565332	1.13658e-07	0.35308	0.536993	0.596059	0.199153	2.014e-07	0.626581	0.764335	0.853865	0.44123
A5.833	A5	1	[29815761 29816606]	[29816190 29816606]	+	AT1G79270	0.100365	0.307529	0.110367	-0.00603871	-0.00062509	0.000751142	0.0019601	0.278753	0.643218	0.910468	0.0531458	0.00280472	0.5502	0.834347	0.98382	0.192057
A5.834	A5	1	[29815873 29816606]	[29816190 29816606]	+	AT1G79270	0.037124	0.198748	-0.0165373	0.0104781	0.00335383	-0.000220127	0.000470135	0.77668	0.160108	0.291677	0.321964	0.000702352	0.915076	0.398532	0.642066	0.577899
A5.839	A5	1	[29816510 29816606]	[29815761 29816606]	+	AT1G79270	0.134561	0.893745	0.112726	-0.00898151	0.00160555	0.000286115	1.38356e-150	0.00172153	0.0593573	0.483433	0.0639795	5.54651e-150	0.0115013	0.21513	0.788584	0.217224
A5.841	A5	1	[29816510 29816606]	[29815873 29816606]	+	AT1G79270	0.0884633	0.902695	0.111347	-0.00327768	-0.00143024	0.000143521	0	9.98098e-09	0.187305	0.177217	0.0526487	0	1.90971e-07	0.436796	0.506455	0.190746
A5.840	A5	1	[29816510 29816606]	[29816190 29816606]	+	AT1G79270	0.181212	0.706366	0.281867	0.00351677	-0.0062909	7.27577e-05	9.45594e-101	1.14902e-16	0.418939	0.000696875	0.574647	3.42131e-100	4.97852e-15	0.675844	0.0125598	0.777587
A5.835	A5	1	[29815761 29816606]	[29816515 29816606]	+	AT1G79270	0.278393	0.168465	0.149261	-0.00788743	0.00743543	0.000526724	0.0404054	0.0835989	0.470787	0.142127	0.122073	0.0512263	0.250033	0.716663	0.462218	0.329678
A5.838	A5	1	[29815873 29816606]	[29816515 29816606]	+	AT1G79270	0.13323	0.0772608	0.0928825	0.00459362	0.00252173	-4.14822e-05	0.133748	0.0788899	0.496988	0.38186	0.836899	0.159571	0.240363	0.736373	0.718277	0.934941
A5.836	A5	1	[29816190 29816606]	[29816515 29816606]	+	AT1G79270	0.151718	0.259882	0.19351	-0.00155966	-0.00261201	0.000110593	3.64165e-12	4.54261e-07	0.750639	0.211967	0.449469	7.32953e-12	6.87736e-06	0.895577	0.552482	0.686408
A5.837	A5	1	[29816510 29816606]	[29816515 29816606]	+	AT1G79270	0.38689	0.438824	0.554717	0.00513841	-0.0108598	0.000166813	4.84531e-14	2.60941e-20	0.50214	0.0011059	0.469177	1.0161e-13	1.50749e-18	0.740301	0.0180938	0.700079
A5.843	A5	1	[29871890 29872305]	[29871894 29872305]	+	AT1G79420	0.00310065	0.0303123	-0.0207806	-0.00275516	0.00149258	5.85037e-05	0.0288214	0.144091	0.130096	0.0544588	0.280689	0.0370938	0.362476	0.351473	0.272754	0.539665
A5.844	A5	1	[29893632 29893726]	[29893637 29893726]	+	AT1G79460	0.0649848	0.0352149	0.0660939	-0.00102317	4.61708e-05	1.28852e-05	0.101933	0.0184197	0.732484	0.973404	0.886399	0.123406	0.0814435	0.884451	1	0.95816
A5.2159	A5	1	[29937648 29938061]	[29937648 29938042]	-	AT1G79570	0.0783536	0.878546	0.13583	0.000336348	-0.00359229	0.000107506	0	1.79625e-50	0.772455	4.39333e-13	0.00192253	0	3.79761e-48	0.906677	7.00348e-11	0.0160849
A5.2164	A5	1	[29963933 29964023]	[29963933 29964019]	-	AT1G79630	0.00597593	0.97732	0.014516	0.000510273	-0.000533757	-7.47894e-06	0	0.0933308	0.644756	0.258038	0.82058	0	0.268785	0.835173	0.606537	0.92566
A5.2165	A5	1	[29964448 29964621]	[29964448 29964905]	-	AT1G79630	0.000540556	0.970321	0.00831357	-0.0047956	-0.000485813	0.000118039	0	0.652217	0.0421571	0.629272	0.0932306	0	0.847024	0.170113	0.871237	0.277698
A5.2167	A5	1	[29971248 29971366]	[29971248 29971441]	-	AT1G79640	0.0706612	0.805425	0.109179	0.00761773	-0.00324375	-0.00115258	2.57919e-35	0.10221	0.383567	0.408534	1.71348e-05	7.05568e-35	0.287009	0.645826	0.736111	0.000311457
A5.2168	A5	1	[29971248 29971366]	[29971248 29971580]	-	AT1G79640	0.0196098	0.902545	0.00734634	0.000347572	0.0010273	-0.00035152	6.25455e-55	0.903999	0.963659	0.754623	0.122376	1.93652e-54	0.972614	0.993204	0.927565	0.330228
A5.2166	A5	1	[29971248 29971580]	[29971248 29971441]	-	AT1G79640	0.0698349	0.396573	0.205103	-0.00612182	-0.00845423	-0.000156701	9.85425e-11	0.00110899	0.446756	0.0137344	0.513354	1.91471e-10	0.00789881	0.699317	0.115298	0.734031
A5.2170	A5	1	[29990825 29991833]	[29990825 29991803]	-	AT1G79700	0.0888623	0.851208	0.103785	0.00620642	-0.000932667	-0.000152237	0	1.78356e-37	2.23476e-09	0.0350818	8.53325e-07	0	2.36301e-35	1.17908e-07	0.209062	2.26726e-05
A5.2171	A5	1	[29992726 29993079]	[29992726 29993321]	-	AT1G79700	0.0033977	0.0585935	0.00618238	-0.00652082	-0.000174043	0.000434394	0.0337519	0.827155	0.0718479	0.910288	5.70798e-05	0.0431378	0.941386	0.243068	0.983744	0.000889932
A5.1214	A5	1	[29996311 29996397]	[29996279 29996397]	+	AT1G79710_and_AT1G09913	0.044381	0.929186	0.027624	-0.00102652	0.00104731	-2.19906e-05	0	0.0930051	0.625635	0.243065	0.725756	0	0.268132	0.824135	0.590238	0.87433
A5.1215	A5	1	[29997010 29997375]	[29997304 29997375]	+	AT1G79710_and_AT1G09913	0.122616	0.829668	0.128584	-0.0038999	-0.000373019	0.000126418	7.6575e-68	0.00855682	0.533095	0.888808	0.49771	2.50077e-67	0.0439867	0.762117	0.976442	0.722017
A5.2496	A5	1	[30010555 30010653]	[30010555 30010636]	-	AT1G79740_and_AT1G79730_and_AT1G79750	0.029558	0.00670652	0.0165666	0.00232187	0.000811964	9.11292e-05	0.457745	0.0737767	0.0501522	0.108198	0.00987905	0.502241	0.229522	0.191942	0.400617	0.0576085
A5.845	A5	1	[30020033 30020105]	[30020037 30020105]	+	AT1G79810	0.000861234	0.0744427	-0.0184668	-0.0043647	0.001208	7.41576e-05	3.09367e-12	0.0917569	0.00183931	0.0431888	0.0756884	6.23587e-12	0.265715	0.0166376	0.238507	0.242506
A5.2499	A5	1	[30025310 30025726]	[30025310 30025649]	-	AT1G79820_and_AT1G79830	0.0238937	0.00335574	0.0356698	0.00020768	-0.000736005	1.36024e-05	0.773244	0.00283212	0.891934	0.258834	0.765213	0.803206	0.0175302	0.962989	0.607382	0.8968
A5.2497	A5	1	[30025310 30025726]	[30025310 30025710]	-	AT1G79820_and_AT1G79830	0.0243946	0.0344507	0.0313148	-0.00334614	-0.000432517	9.88069e-05	0.00687383	0.0166274	0.0454852	0.544304	0.0474559	0.00938959	0.0751459	0.17952	0.827122	0.177424
A5.2501	A5	1	[30028619 30028761]	[30028619 30028907]	-	AT1G79820_and_AT1G79830	0.00902997	0.980945	0.00504743	-0.000189858	0.000248909	-1.02755e-05	0	0.0637967	0.585782	0.0938277	0.322232	0	0.206827	0.797545	0.371942	0.577996
A5.2502	A5	1	[30030287 30030362]	[30030287 30030422]	-	AT1G79820_and_AT1G79830	0.000923225	0.993321	0.0018462	0.000396748	-5.76859e-05	-6.94664e-06	0	0.157289	0.0175265	0.417939	0.162742	0	0.383395	0.0918698	0.743477	0.390923
A5.1216	A5	1	[30037632 30037705]	[30037603 30037705]	+	AT1G79840_and_AT1G09927	0.0054292	0.996683	-0.00817971	0.00122609	0.000850557	-7.84824e-05	0	0.057712	0.0261804	0.000297507	1.78101e-06	0	0.192524	0.121926	0.00636661	4.33915e-05
A5.2172	A5	1	[30046306 30046419]	[30046306 30046455]	-	AT1G79880	0.00362168	0.973895	0.00858867	0.000641551	-0.000310437	3.27128e-06	0	0.144486	0.39422	0.333621	0.884077	0	0.363134	0.654551	0.679826	0.957234
A5.846	A5	1	[30069712 30069991]	[30069669 30069991]	+	AT1G79940	1.21913e-05	0.999345	4.14503e-05	6.79043e-05	-1.82869e-06	-1.61034e-06	0	0.886367	0.0672838	0.907998	0.145299	0	0.966514	0.233043	0.982769	0.364961
A5.847	A5	1	[30078608 30078739]	[30078639 30078739]	+	AT1G79950	0.0159737	0.0335193	0.0169907	-0.00433988	-6.35631e-05	0.00029948	0.0240809	0.265022	0.026066	0.939074	2.55535e-07	0.0312517	0.534518	0.121696	0.993357	7.75712e-06
A5.1218	A5	1	[30089189 30089313]	[30089212 30089313]	+	AT1G79990_and_AT1G09947	0.268766	0.0535499	0.122221	-0.00401269	0.00915908	0.000176999	6.59647e-05	6.82885e-19	0.0227193	3.31345e-34	0.000744753	0.000103408	3.50979e-17	0.110303	8.97945e-31	0.00757458
A5.1217	A5	1	[30091648 30091926]	[30091624 30091926]	+	AT1G79990_and_AT1G09947	0.00541569	0.00167652	0.00126236	-4.3957e-05	0.000259584	4.79896e-08	0.38274	0.521758	0.861582	0.0157447	0.994903	0.425934	0.759491	0.949773	0.125663	1
A5.850	A5	1	[30092950 30093160]	[30093078 30093160]	+	AT1G80000	0.141548	0.408049	0.382689	0.0162023	-0.0150713	-2.87236e-05	1.21874e-05	6.36682e-05	0.185747	0.00389302	0.937245	1.98462e-05	0.000636468	0.434906	0.0472954	0.982687
A5.2503	A5	1	[30104186 30104273]	[30104186 30104274]	-	AT1G80030_and_AT1G80040_and_MSTRG.8180_and_AT1G80020	0.0177757	0.0274455	-0.0290821	-0.00467018	0.00292861	0.000145853	0.474441	0.460034	0.353773	0.172653	0.331074	0.518765	0.718527	0.619124	0.50071	0.583568
A5.2504	A5	1	[30105250 30105340]	[30105250 30105376]	-	AT1G80030_and_AT1G80040_and_MSTRG.8180_and_AT1G80020	0.112028	0.5261	0.0868209	-0.00764435	0.00157545	9.58528e-05	5.90829e-137	6.15121e-05	0.00582438	0.182599	0.245865	2.31106e-136	0.000617451	0.0403779	0.51439	0.499504
A5.2506	A5	1	[30107953 30108121]	[30107953 30108140]	-	AT1G80030_and_AT1G80040_and_MSTRG.8180_and_AT1G80020	0.00380428	0.970644	0.00428464	0.000836947	-3.00226e-05	-7.68673e-05	0	0.696055	0.550888	0.959983	0.0659971	0	0.871948	0.773453	1	0.221505
A5.2505	A5	1	[30110621 30110880]	[30110621 30110696]	-	AT1G80030_and_AT1G80040_and_MSTRG.8180_and_AT1G80020	0.000198334	0.00557629	0.00487981	-0.00070928	-0.000292592	4.69686e-05	0.115193	0.179038	0.126872	0.139713	0.000692019	0.138587	0.417877	0.346278	0.45919	0.00713562
A5.2507	A5	1	[30111980 30112126]	[30111980 30112159]	-	AT1G80050_and_AT1G80060	0.0227666	0.0337725	0.013108	-0.000684538	0.00060366	-4.34498e-06	6.84495e-08	0.0412346	0.404757	0.0848765	0.859127	1.22221e-07	0.150878	0.663875	0.352147	0.945703
A5.2508	A5	1	[30115439 30116151]	[30115439 30116297]	-	AT1G80050_and_AT1G80060	0.00765271	0.0129743	-0.000676679	-0.00195176	0.000580471	8.59222e-05	0.0329176	0.913637	0.0150096	0.0931905	0.000331165	0.0421238	0.976393	0.0819033	0.370749	0.00391436
A5.2173	A5	1	[30141418 30141517]	[30141418 30141504]	-	AT1G80130	0.0228188	0.00687687	0.0219355	0.00010243	5.52102e-05	1.06426e-05	0.434358	0.0150717	0.92931	0.910711	0.75705	0.479014	0.0693879	0.978371	0.98392	0.892482
A5.1220	A5	1	[30159332 30159439]	[30159245 30159439]	+	AT1G80190_and_AT1G80200	0.0604597	0.235778	0.0215932	-0.00628171	0.00242915	0.000514764	2.96773e-11	0.552855	0.17719	0.221019	0.000206125	5.84796e-11	0.78185	0.423273	0.563725	0.0026383
A5.1219	A5	1	[30160073 30160156]	[30160071 30160156]	+	AT1G80190_and_AT1G80200	0.101237	-0.0164979	0.0894017	0.00349051	0.000739693	-0.000101498	0.202138	1.61332e-11	0.0397842	0.306879	0.044806	0.2355	4.36416e-10	0.163589	0.657719	0.170496
A5.852	A5	1	[30174289 30174538]	[30174349 30174538]	+	AT1G80245	0.00842414	0.587837	-0.0454513	-0.0102295	0.00336721	0.000291938	3.49749e-36	0.343828	0.0958654	0.198616	0.110714	9.62876e-36	0.617701	0.292289	0.535467	0.3104
A5.854	A5	1	[30181053 30181226]	[30181077 30181226]	+	AT1G80270	0.0833388	0.75448	0.0494778	0.0163809	0.00247445	-0.000857964	5.93977e-10	0.692781	0.333379	0.750717	0.101482	1.13017e-09	0.870136	0.600656	0.926014	0.293081
A5.853	A5	1	[30181053 30181231]	[30181077 30181231]	+	AT1G80270	0.352697	0.582598	0.270107	0.00367419	0.00516185	-0.000240101	1.2327e-14	0.000491224	0.710953	0.222099	0.416362	2.61898e-14	0.00388934	0.872161	0.564904	0.659639
A5.2174	A5	1	[30184557 30184662]	[30184557 30184657]	-	AT1G80280	0.0290658	0.0160268	0.00643598	0.000583065	0.00141437	-2.59644e-05	0.151056	0.574095	0.690652	0.0235739	0.551989	0.178974	0.796805	0.862027	0.16339	0.761691
A5.2176	A5	1	[30210671 30210761]	[30210671 30210790]	-	AT1G80360	0.0443637	0.366832	0.0525038	-0.000725098	-0.000508762	-0.000113651	7.19608e-18	0.229571	0.896812	0.831011	0.495098	1.62315e-17	0.489382	0.965094	0.95665	0.719945
A5.2175	A5	1	[30210671 30210761]	[30210671 30211091]	-	AT1G80360	0.0217704	0.426302	0.0409047	0.000817159	-0.00119589	1.50889e-05	1.55203e-55	0.142031	0.818667	0.431367	0.887019	4.81738e-55	0.359087	0.929128	0.753327	0.95816
A5.1223	A5	1	[30217632 30217862]	[30217575 30217862]	+	AT1G80380_and_AT1G80400_and_AT1G09963_and_AT1G80430	0.0517644	0.711496	0.10048	-0.0216673	-0.00304475	0.00070815	6.06782e-228	9.11456e-06	7.51262e-14	0.0137165	2.33985e-16	2.68769e-227	0.000108034	9.59496e-12	0.11518	3.22921e-14
A5.1224	A5	1	[30218927 30219060]	[30218945 30219060]	+	AT1G80380_and_AT1G80400_and_AT1G09963_and_AT1G80430	0.000813756	0.985617	0.00306063	0.000678382	-0.00014043	-1.13942e-05	0	0.0147356	2.38906e-05	0.040253	0.0172328	0	0.0681775	0.00043585	0.227996	0.0865271
A5.2510	A5	1	[30266508 30266899]	[30266508 30266882]	-	AT1G80480_and_AT1G80490	0.11731	0.0319699	0.0345311	-0.00535437	0.00517367	0.000167535	0.246138	0.22206	0.138905	0.000797971	0.120167	0.283067	0.479578	0.366537	0.0139336	0.326628
A5.2509	A5	1	[30266508 30266899]	[30266508 30266895]	-	AT1G80480_and_AT1G80490	0.24029	0.0948316	0.0962261	-0.0105643	0.009004	0.000347008	0.000212811	0.000249379	0.00167151	3.33027e-10	0.000530191	0.000324612	0.00214669	0.0154457	3.47116e-08	0.00576614
A5.855	A5	1	[30270735 30271148]	[30270930 30271148]	+	AT1G80500	0.00121084	0.00580159	0.00126758	-6.77601e-06	-3.54628e-06	-1.36968e-06	0.000368135	0.448093	0.974715	0.968968	0.829747	0.000553633	0.709269	0.999012	1	0.930916
A5.1225	A5	1	[30289111 30289201]	[30289116 30289201]	+	AT1G80555_and_AT1G80560	0.184287	0.0477288	0.0874124	-0.00679834	0.00605464	0.000242521	0.00259415	7.56189e-08	0.00108026	8.65391e-12	9.09395e-05	0.00367843	1.28664e-06	0.0108216	1.15166e-09	0.0013219
A5.1226	A5	1	[30312533 30312631]	[30312551 30312631]	+	AT1G80640_and_AT1G80650	9.56904e-05	0.978688	0.00373107	0.0019421	-0.000227211	-7.56176e-05	0	0.33252	8.06317e-05	0.279379	2.578e-07	0	0.605772	0.00124994	0.630906	7.80205e-06
A5.2180	A5	1	[30329545 30329892]	[30329545 30329880]	-	AT1G80690	0.0490126	0.089296	-0.0425895	0.0043108	0.00572513	-2.30941e-05	0.0366952	0.33142	0.44226	0.0167002	0.890118	0.0467252	0.604849	0.695941	0.130221	0.959601
A5.856	A5	1	[30332647 30332745]	[30332651 30332745]	+	AT1G80700	0.014952	0.959317	0.0314789	0.000894966	-0.00103293	-2.15478e-06	0	0.000190823	0.407072	0.0248294	0.946587	0	0.00169349	0.665764	0.169529	0.987119
A5.859	A5	1	[30355353 30355662]	[30355569 30355662]	+	AT1G80770	0.0144172	0.551434	0.0250891	0.0115694	-0.000659822	-0.000328388	3.20464e-05	0.855253	0.510939	0.929062	0.533467	5.11295e-05	0.95295	0.746475	0.990653	0.74843
A5.858	A5	1	[30356932 30357010]	[30356931 30357010]	+	AT1G80770	0.0779154	0.0114033	0.136886	0.00119312	-0.00368564	-6.31607e-05	0.416576	1.98872e-21	0.517255	2.7131e-06	0.249919	0.460818	1.21733e-19	0.750933	0.000113274	0.504599
A5.1227	A5	1	[30359736 30359870]	[30359697 30359870]	+	AT1G80790_and_AT1G80780_and_MSTRG.8259	0.0159883	0.709578	0.0640567	0.0014102	-0.00300427	0.000121476	2.24759e-19	0.428361	0.8916	0.495949	0.693589	5.19264e-19	0.692757	0.962853	0.796865	0.856438
A5.860	A5	1	[30365334 30365526]	[30365289 30365526]	+	AT1G80810	0.000978244	0.994135	0.00573111	-0.00342996	-0.000297054	0.000126002	0	0.691643	0.0635495	0.706298	0.022168	0	0.869733	0.224376	0.905619	0.103562
A5.2181	A5	1	[30388302 30388383]	[30388302 30388378]	-	AT1G80860	0.10096	0.839075	0.141894	0.000437513	-0.00255834	8.41686e-05	0	1.01164e-11	0.869734	0.0245149	0.289662	0	2.77945e-10	0.953166	0.167997	0.549429
A5.2182	A5	1	[30399889 30400216]	[30399889 30400176]	-	AT1G80900	0.0198145	0.0111676	0.0324597	0.00162293	-0.000790327	-5.46721e-05	0.52714	0.0731874	0.483825	0.423927	0.428588	0.568834	0.22838	0.726555	0.747016	0.670314
A5.862	A5	1	[30411259 30411348]	[30411073 30411348]	+	AT1G80940	0.00855676	0.970857	0.0115721	0.000116752	-0.000188457	1.98453e-05	0	0.00120415	0.798467	0.333758	0.145224	0	0.00849801	0.919185	0.679924	0.364865
A5.861	A5	1	[30411603 30411748]	[30411680 30411748]	+	AT1G80940	0.0450236	0.946791	0.0487134	-0.00105547	-0.000230612	4.02156e-05	0	5.02534e-09	0.322135	0.611927	0.205481	0	1.00473e-07	0.592293	0.862541	0.449861
A5.2183	A5	1	[30422671 30422769]	[30422671 30422765]	-	AT1G80980	0.00409453	0.972583	0.0195938	0.000743491	-0.000968706	1.16386e-05	0	0.00562631	0.411546	0.0121007	0.666157	0	0.0312328	0.669222	0.10529	0.8402
A5.2184	A5	1	[30423644 30423804]	[30423644 30423724]	-	AT1G80980	0.0229702	0.950413	0.0590914	0.000169331	-0.00203805	5.42649e-05	0	0.0053331	0.948845	0.0629072	0.466832	0	0.0298346	0.987151	0.29785	0.697977
A5.3074	A5	2	[77281 77474]	[77400 77474]	+	AT2G01070_and_AT2G01080_and_AT2G01090_and_AT2G01100	0.0023278	0.00524233	0.00555333	0.000233592	-0.000201596	-8.72052e-06	0.162283	0.14903	0.635211	0.336964	0.552244	0.191469	0.370587	0.830074	0.682398	0.761887
A5.3075	A5	2	[79805 79944]	[79852 79944]	+	AT2G01070_and_AT2G01080_and_AT2G01090_and_AT2G01100	0.0181312	0.624185	0.0274555	0.0168626	-0.000582769	-0.000290152	1.3862e-61	0.477726	0.000653994	0.78237	0.049046	4.42427e-61	0.7326	0.00712036	0.939209	0.181555
A5.3076	A5	2	[80181 80605]	[80180 80605]	+	AT2G01070_and_AT2G01080_and_AT2G01090_and_AT2G01100	0.0207855	0.994774	0.0102698	-0.00345531	0.000657234	9.91941e-05	0	0.625033	0.198708	0.566427	0.215602	0	0.829553	0.452051	0.838391	0.462813
A5.3822	A5	2	[108114 108208]	[108114 108504]	-	AT2G01170_and_AT2G01180_and_AT2G01175	0.00145039	0.994797	-0.00601281	5.44767e-05	0.00046645	-1.71217e-05	0	0.236264	0.933159	0.0921481	0.376321	0	0.49834	0.979902	0.368617	0.626537
A5.2512	A5	2	[123379 123482]	[123390 123482]	+	AT2G01220	0.0466959	0.846032	0.157343	-0.00386544	-0.00691545	-0.000221121	2.83141e-55	0.00452666	0.585671	0.0221868	0.295296	8.77748e-55	0.0260703	0.797545	0.157249	0.555319
A5.2513	A5	2	[124296 124550]	[124269 124550]	+	AT2G01220	0.0203942	0.966179	0.0131215	-0.00424786	0.000454538	1.12911e-05	0	0.266052	0.00488965	0.480053	0.801772	0	0.535733	0.0352085	0.786395	0.916402
A5.2514	A5	2	[139650 139915]	[139770 139915]	+	AT2G01270	0.00416131	0.00292761	-0.00191692	0.000124842	0.000379889	-7.58324e-06	0.306496	0.513969	0.739715	0.0177441	0.498218	0.347269	0.754303	0.888756	0.135524	0.722403
A5.3824	A5	2	[154500 154610]	[154500 154676]	-	AT2G01320_and_AT2G01330	0.0361599	0.297322	-0.011412	-0.0147739	0.00297324	0.000393256	2.45234e-16	0.759071	0.00191301	0.142997	0.00556343	5.38403e-16	0.905509	0.0170995	0.463393	0.0373191
A5.3825	A5	2	[160203 160363]	[160203 160297]	-	AT2G01320_and_AT2G01330	0.0175476	0.0508406	0.0117765	-0.00495388	0.000360694	0.000209863	0.0185499	0.594997	0.0804867	0.765353	0.0129511	0.0243428	0.810273	0.260423	0.932526	0.0704723
A5.3078	A5	2	[174148 174281]	[174162 174281]	+	AT2G01390_and_AT2G01400_and_AT2G03975	0.160698	0.234998	0.00601391	-0.00544023	0.00923123	3.96198e-05	5.28972e-06	0.91087	0.412388	0.00116977	0.839339	8.7521e-06	0.975098	0.6703	0.0188797	0.936485
A5.3279	A5	2	[180977 181354]	[180977 181057]	-	AT2G01420	0.00082725	-0.000115092	0.000910176	0.000336764	-5.18289e-06	-3.34655e-06	0.958213	0.686285	0.242784	0.966372	0.696857	0.972635	0.86746	0.507737	1	0.85826
A5.3278	A5	2	[181847 182016]	[181847 182004]	-	AT2G01420	0.331426	0.681444	0.284144	-0.00966676	0.00295517	0.000186791	0	9.45836e-61	1.22973e-05	0.00172067	0.00457569	0	2.76425e-58	0.000246525	0.0254304	0.0319965
A5.3280	A5	2	[201488 201683]	[201488 201604]	-	AT2G01450	0.0574874	0.947248	0.0394004	-0.00845911	0.00113044	0.000209255	0	5.34661e-05	1.20737e-11	0.0336147	1.81913e-08	0	0.000543968	1.04324e-09	0.204126	7.24011e-07
A5.3281	A5	2	[290983 291155]	[290983 291161]	-	AT2G01660	0.0132728	0.0550939	0.0107044	0.00222706	0.000160529	-0.000112333	0.00916331	0.621641	0.422236	0.892085	0.174272	0.0123791	0.827486	0.678916	0.977532	0.407008
A5.3284	A5	2	[367436 367553]	[367436 367954]	-	AT2G01830	0.135822	0.668694	0.230056	-0.00710302	-0.00732117	-0.000131085	2.0176e-14	0.00714124	0.515504	0.139487	0.691878	4.26831e-14	0.0379263	0.749978	0.458597	0.855713
A5.3285	A5	2	[397855 398006]	[397855 397922]	-	AT2G01890	0.00070045	0.997034	0.00305487	-0.000140474	-0.000147151	7.78873e-06	0	0.207372	0.650438	0.265598	0.399081	0	0.458247	0.838465	0.61581	0.646644
A5.3080	A5	2	[419020 419113]	[419035 419113]	+	AT2G01905_and_AT2G01910	0.00280061	0.342859	-0.0196659	0.0035711	0.00140415	-0.000175251	2.05321e-63	0.347284	0.182214	0.218661	0.0280132	6.60119e-63	0.62129	0.430413	0.561147	0.122841
A5.2517	A5	2	[458553 458639]	[458549 458639]	+	AT2G01980	0.0197083	0.00605967	0.013015	0.000636958	0.00041833	-3.4932e-05	0.631875	0.315855	0.70122	0.554553	0.480071	0.670328	0.589251	0.86668	0.832824	0.708497
[truncated: 26,925 more rows]
